# Supplementary material for: Independent COL5A1 Variants in Cats with Ehlers-Danlos Syndrome
Source: Genes (Basel). 2022 Apr 29;13(5):797. doi: 10.3390/genes13050797 (PMC9140822; doi:10.3390/genes13050797)
Supplement: Supplementary file 1 [file genes-13-00797-s001.zip]

Archive with 5 entries (5 files):
- Figure_S1.pdf
- Table_S1_Candidate_Genes.xlsx
- Table_S2_Public_Genomes.xlsx
- Table_S3_Primer_Sequences.xlsx
- Table_S4_Private_Variants.xlsx
