# Supplementary material for: Independent COL5A1 Variants in Cats with Ehlers-Danlos Syndrome
Source: Genes (Basel). 2022 Apr 29;13(5):797. doi: 10.3390/genes13050797 (PMC9140822; doi:10.3390/genes13050797)
Supplement: Supplementary file 1 [file genes-13-00797-s001.zip › Table_S1_Candidate_Genes.xlsx]

## Sheet: candidate genes
Table S1. 20 known functional candidate genes for Ehlers-Danlos syndrome in humans.
Gene	Full Name	EDS type	Mode of inheritance
ADAMTS2	A disintegrin and metalloproteinase with thrombospondin motifs 2	Dermatosparaxis	autosomal recessive
AEBP1	Adipocyte enhancer-binding protein 1	Classical-like type 2	autosomal recessive
B3GALT6	Beta-1,3-galactosyltransferase 6	Spondylo-dysplastic	autosomal recessive
B4GALT7	Beta-1,4-galactosyltransferase 7	Spondylo-dysplastic	autosomal dominant
CHST14	Carbohydrate sulfotransferase 14	Musculocontractural	autosomal recessive
COL1A1	Collagen, type I, alpha-1	Classical, Vascular, Artrochalasia	autosomal dominant
COL1A2	Collagen, type I, alpha-2	Artrochalasia, Cardiac valvular	autosomal dominant
COL3A1	Collagen, type III, alpha-1	Vascular	autosomal dominant
COL5A1	Collagen, type V, alpha-1	Classical	autosomal dominant
COL5A2	Collagen, type V, alpha-2	Classical	autosomal dominant
COL12A1	Collagen, type XII, alpha-1	Myopathic	autosomal dominant
C1R	Complement component 1, r subcomponent	Periodontal	autosomal dominant
C1S	Complement component 1, s subcomponent	Periodontal	autosomal dominant
DSE	Dermatan sulfate epimerase	Musculocontractural	autosomal recessive
FKBP14	FK506-binding protein 14	Kyphoscoliotic	autosomal recessive
PLOD1	Procollagen-lysine, 2-oxoglutarate 5-dioxygenase	Kyphoscoliotic	autosomal recessive
PRDM5	PR/SET domain 5	Brittle cornea syndrome	autosomal recessive
SLC39A13	Solute carrier family 39 (zinc transporter), member 13	Spondylo-dysplastic	autosomal recessive
TNXB	Tenascin XB	Classical-like	autosomal recessive
ZNF469	Zinc finger protein 469	Brittle cornea syndrome	autosomal recessive
Reference:
Malfait F, Castori M, Francomano CA, Giunta C, Kosho T, Byers PH. The Ehlers-Danlos syndromes. Nat Rev Dis Primers. 2020 Jul 30;6(1):64. doi: 10.1038/s41572-020-0194-9.
