# Supplementary material for: Independent COL5A1 Variants in Cats with Ehlers-Danlos Syndrome
Source: Genes (Basel). 2022 Apr 29;13(5):797. doi: 10.3390/genes13050797 (PMC9140822; doi:10.3390/genes13050797)
Supplement: Supplementary file 1 [file genes-13-00797-s001.zip › Table_S2_Public_Genomes.xlsx]

## Sheet: Sheet1
Table S2. Accession numbers of 57 cat genome sequences. The affected cats are highlighted in red. The other 54 genome sequences were used as controls in variant filtering.
Sample ID	Breed	Study accession	Sample accession	Remark
K350	Norwegian Forest Cat	PRJEB7401	SAMEA5885912
K443	Maine Coon	PRJEB7401	SAMEA1061682
K450	Domestic shorthair	PRJEB7401	SAMEA2785958
K452	Bengal	PRJEB7401	SAMEA1061681
K469	Egyptian Mau	PRJEB7401	SAMEA1061683
K471	Domestic shorthair	PRJEB7401	SAMEA1061684
K472	Domestic shorthair	PRJEB7401	SAMEA1061685
K473	Domestic shorthair	PRJEB7401	SAMEA1061686
K484	Bengal	PRJEB7401	SAMEA5885917
K485	Bengal	PRJEB7401	SAMEA5885918
K486	Bengal	PRJEB7401	SAMEA5885919
K488	Toyger	PRJEB7401	SAMEA5885925
K494	Maine Coon	PRJEB7401	SAMEA5885913
K499	unknown/mixed breed	PRJEB7401	SAMEA1061687
K502	British Shorthair	PRJEB7401	SAMEA1061688
K509	Bengal	PRJEB7401	SAMEA5885921	affected with Ehlers-Danlos syndrome, case no. 1
K510	Domestic shorthair	PRJEB7401	SAMEA104694019
K513	British Shorthair	PRJEB7401	SAMEA5885914
K514	British Shorthair	PRJEB7401	SAMEA5885915
K515	Persian	PRJEB7401	SAMEA1061689
K516	Maine Coon	PRJEB7401	SAMEA5885928
K517	British Shorthair	PRJEB7401	SAMEA5885916
K518	Domestic shorthair	PRJEB7401	SAMEA5885922
K519	Maine Coon	PRJEB7401	SAMEA5885923
K520	Bengal	PRJEB7401	SAMEA5885926
K528	Persian	PRJEB7401	SAMEA5885983
K529	Persian	PRJEB7401	SAMEA5885984
K530	Persian	PRJEB7401	SAMEA5885985
K531	Persian	PRJEB7401	SAMEA5885986
K532	Domestic shorthair	PRJEB7401	SAMEA5885924
K533	Not purebred (Bombay ?)	PRJEB7401	SAMEA5885927	affected with Ehlers-Danlos syndrome, case no. 2
K544	Domestic longhair	PRJEB7401	SAMEA5885929
K548	Domestic shorthair	PRJEB7401	SAMEA5885930
K549	Domestic shorthair	PRJEB7401	SAMEA5905717
K553	Domestic shorthair	ERS5599860	SAMEA7853381	affected with Ehlers-Danlos syndrome, case no. 4
K556	Domestic shorthair	ERS5599861	SAMEA7853382
K560	Domestic shorthair	PRJEB7401	SAMEA8952636
K563	Domestic shorthair	PRJEB7401	SAMEA6085996
K564	Domestic shorthair	ERS5599862	SAMEA7853383
K566	Maine Coon	PRJEB7401	SAMEA7376281
K573	Domestic longhair	PRJEB7403	SAMEA7376283
K578	Domestic longhair	PRJEB7404	SAMEA7376284
K580	Domestic shorthair	PRJEB7405	SAMEA7376285
K581	Domestic shorthair	PRJEB7406	SAMEA7376286
K583	Domestic shorthair	PRJEB7401	SAMEA7853384
K584	Domestic shorthair	PRJEB7401	SAMEA7853385
K591	Turkish Van	PRJEB7401	SAMEA8609184
K596	British Shorthair	PRJEB7401	SAMEA8609185
K601	Maine Coon	PRJEB7401	SAMEA8952637
K602	Domestic shorthair	PRJEB7401	SAMEA8609186
K610	Siberian	PRJEB7401	SAMEA8952638
K620	Ragdoll	PRJEB7401	SAMEA8952639
K626	Domestic shorthair	PRJEB7401	SAMEA8952640
K627	Domestic shorthair	PRJEB7401	SAMEA8952641
K629	Domestic shorthair	PRJEB7401	SAMEA8952642
K646	Maine Coon	PRJEB7401	SAMEA8952643
S19190_Tessa	Burmese	PRJNA288177	SAMN05980350
