# Supplementary material for: Independent COL5A1 Variants in Cats with Ehlers-Danlos Syndrome
Source: Genes (Basel). 2022 Apr 29;13(5):797. doi: 10.3390/genes13050797 (PMC9140822; doi:10.3390/genes13050797)
Supplement: Supplementary file 1 [file genes-13-00797-s001.zip › Table_S3_Primer_Sequences.xlsx]

## Sheet: Sheet1
Table S3. Details of the primers used for Sanger sequencing and PCR.
Variant	Primer name	Primer sequence (5' to 3')	Amplicon length (bp)	TM (°C)	Use
COL5A1:c.112_118+15del	COL5A1_F3	CTGCTCCCCATGACTTCCTA	243 (F3+wt) 227 (F3+del)	60	PCR on genomic DNA
	COL5A1_wt	CCCCAGCGCCTTACCT			PCR on genomic DNA
	COL5A1_del	CCCGCGCTCAGAGG			PCR on genomic DNA
COL5A1:c.3514A>T	COL5A1_F	GCGTCCCGTTCAGTATTGTATT	391	60	PCR on genomic DNA
	COL5A1_R	GCACAGACACACACACATGC			PCR on genomic DNA
COL5A1:c.3066del	COL5A1_F1	AAAACAGCCGGACAGAACAG	250	60	PCR on genomic DNA
	COL5A1_R1	CAGGGTTGTCCTTAGCTTGG			PCR on genomic DNA
TNXB:c.7084A>G	TNXB_F	GACAGGATCGTCCCCAGACT	407	60	PCR on genomic DNA
	TNXB_R	CTCAAAGGCTTCCACTCCAG			PCR on genomic DNA
TNXB:c.12047C>T	TNXB_F1	CAGCCCAGATTAAGCCTCAG	448	60	PCR on genomic DNA
	TNXB_R1	ACTCCCGTACAAACCCCTTC			PCR on genomic DNA
