# Supplementary material for: Independent COL5A1 Variants in Cats with Ehlers-Danlos Syndrome
Source: Genes (Basel). 2022 Apr 29;13(5):797. doi: 10.3390/genes13050797 (PMC9140822; doi:10.3390/genes13050797)
Supplement: Supplementary file 1 [file genes-13-00797-s001.zip › Table_S4_Private_Variants.xlsx]

## Sheet: priv.hom.prot.chang.var. case 1
Table S4. 91 protein changing private variants in the sequenced Bengal cat (case no. 1) with EDS. Private variants were obtained by filtering all variants that were present at least once in 54 control genomes. Variants are listed multiple times, if they have predicted effects on more than one transcript. Variants with a SnpEff predicted impact of "high" or "moderate" were considered protein chang…
#CHROM	POS	REF	ALT	FILTER	EFFECT	IMPACT	GENE	GENEID	FEATURE	FEATUREID	BIOTYPE	RANK	HGVS_C	HGVS_P
chrA1	109245609	G	T	PASS	splice_acceptor_variant&intron_variant	HIGH	KIAA1024L	101092330	transcript	XM_003980737.2	protein_coding	3	c.394-1G>T
chrA2	6433	T	C	PASS	missense_variant	MODERATE			transcript	TRANSCRIPT_	protein_coding	7	c.4073T>C	p.Val1358Ala
chrA2	6438	C	T	PASS	missense_variant	MODERATE			transcript	TRANSCRIPT_	protein_coding	7	c.4078C>T	p.Pro1360Ser
chrB1	65333372	T	C	PASS	missense_variant	MODERATE	LOC101097889	101097889	transcript	XM_019828738.2	protein_coding	1	c.409A>G	p.Thr137Ala
chrB1	65333429	C	T	PASS	missense_variant	MODERATE	LOC101097889	101097889	transcript	XM_019828738.2	protein_coding	1	c.352G>A	p.Ala118Thr
chrB1	65379825	T	A	PASS	splice_donor_variant&intron_variant	HIGH	LOC101082233	101082233	transcript	101082233	pseudogene	3	n.717+2T>A
chrB1	135616273	T	C	PASS	missense_variant	MODERATE	HSD17B11	101096312	transcript	XM_003985194.5	protein_coding	2	c.218T>C	p.Ile73Thr
chrB1	135876395	G	A	PASS	missense_variant	MODERATE	AFF1	101099959	transcript	XM_019829263.2	protein_coding	12	c.2243C>T	p.Pro748Leu
chrB1	135876395	G	A	PASS	missense_variant	MODERATE	AFF1	101099959	transcript	XM_011281773.2	protein_coding	11	c.2198C>T	p.Pro733Leu
chrB1	135876395	G	A	PASS	missense_variant	MODERATE	AFF1	101099959	transcript	XM_023252950.1	protein_coding	17	c.2243C>T	p.Pro748Leu
chrB1	175401820	T	C	PASS	missense_variant	MODERATE	FAM114A1	101085038	transcript	XM_003985439.3	protein_coding	13	c.1561A>G	p.Met521Val
chrB1	175401820	T	C	PASS	missense_variant	MODERATE	FAM114A1	101085038	transcript	XM_023253198.1	protein_coding	9	c.973A>G	p.Met325Val
chrB1	175401820	T	C	PASS	missense_variant	MODERATE	FAM114A1	101085038	transcript	XM_019829634.1	protein_coding	13	c.1561A>G	p.Met521Val
chrB1	175401820	T	C	PASS	missense_variant	MODERATE	FAM114A1	101085038	transcript	XM_023253196.1	protein_coding	13	c.1561A>G	p.Met521Val
chrB1	175401820	T	C	PASS	missense_variant	MODERATE	FAM114A1	101085038	transcript	XM_023253197.1	protein_coding	13	c.1558A>G	p.Met520Val
chrB2	151246072	C	T	PASS	missense_variant	MODERATE	CB2H6orf118	101098463	transcript	XM_023254559.1	protein_coding	6	c.1055G>A	p.Arg352Gln
chrB2	151246072	C	T	PASS	missense_variant	MODERATE	CB2H6orf118	101098463	transcript	XM_023254560.1	protein_coding	6	c.1055G>A	p.Arg352Gln
chrB2	151252523	T	C	PASS	missense_variant	MODERATE	CB2H6orf118	101098463	transcript	XM_023254559.1	protein_coding	5	c.959A>G	p.Lys320Arg
chrB2	151252523	T	C	PASS	missense_variant	MODERATE	CB2H6orf118	101098463	transcript	XM_023254560.1	protein_coding	5	c.959A>G	p.Lys320Arg
chrB2	151256497	C	T	PASS	missense_variant	MODERATE	CB2H6orf118	101098463	transcript	XM_023254559.1	protein_coding	2	c.539G>A	p.Arg180His
chrB2	151256497	C	T	PASS	missense_variant	MODERATE	CB2H6orf118	101098463	transcript	XM_023254560.1	protein_coding	2	c.539G>A	p.Arg180His
chrB2	151256812	G	T	PASS	missense_variant	MODERATE	CB2H6orf118	101098463	transcript	XM_023254559.1	protein_coding	2	c.224C>A	p.Ala75Glu
chrB2	151256812	G	T	PASS	missense_variant	MODERATE	CB2H6orf118	101098463	transcript	XM_023254560.1	protein_coding	2	c.224C>A	p.Ala75Glu
chrB2	151533197	T	TCTC	PASS	conservative_inframe_insertion	MODERATE	PDE10A	101098715	transcript	XM_023254561.1	protein_coding	1	c.100_101insGAG	p.Ala33_Glu34insGly
chrB2	151533197	T	TCTC	PASS	conservative_inframe_insertion	MODERATE	PDE10A	101098715	transcript	XM_023254562.1	protein_coding	1	c.100_101insGAG	p.Ala33_Glu34insGly
chrB2	151533197	T	TCTC	PASS	conservative_inframe_insertion	MODERATE	PDE10A	101098715	transcript	XM_023254565.1	protein_coding	1	c.100_101insGAG	p.Ala33_Glu34insGly
chrB2	151533201	C	T	PASS	missense_variant	MODERATE	PDE10A	101098715	transcript	XM_023254561.1	protein_coding	1	c.97G>A	p.Ala33Thr
chrB2	151533201	C	T	PASS	missense_variant	MODERATE	PDE10A	101098715	transcript	XM_023254562.1	protein_coding	1	c.97G>A	p.Ala33Thr
chrB2	151533201	C	T	PASS	missense_variant	MODERATE	PDE10A	101098715	transcript	XM_023254565.1	protein_coding	1	c.97G>A	p.Ala33Thr
chrB2	151680766	T	C	PASS	splice_acceptor_variant&intron_variant	HIGH	LOC101098956	101098956	transcript	101098956	pseudogene	1	n.34-2A>G
chrB2	152019504	C	T	PASS	missense_variant	MODERATE	T	101099211	transcript	XM_003986708.3	protein_coding	8	c.1084G>A	p.Ala362Thr
chrB2	152021464	G	A	PASS	missense_variant	MODERATE	T	101099211	transcript	XM_003986708.3	protein_coding	7	c.910C>T	p.Pro304Ser
chrB2	152026725	A	G	PASS	missense_variant	MODERATE	T	101099211	transcript	XM_003986708.3	protein_coding	2	c.268T>C	p.Phe90Leu
chrB2	152171485	C	G	PASS	missense_variant	MODERATE	PRR18	111560608	transcript	XM_023254743.1	protein_coding	2	c.661G>C	p.Gly221Arg
chrB2	152171746	G	A	PASS	missense_variant	MODERATE	PRR18	111560608	transcript	XM_023254743.1	protein_coding	2	c.400C>T	p.Pro134Ser
chrB2	152171762	G	GCGCGC	PASS	frameshift_variant	HIGH	PRR18	111560608	transcript	XM_023254743.1	protein_coding	2	c.383_384insGCGCG	p.Phe129fs
chrB2	152205277	TAG	T	PASS	splice_acceptor_variant&intron_variant	HIGH	LOC102899114	102899114	transcript	XR_440384.4	pseudogene	1	n.239-2_239-1delAG
chrB2	152653235	C	T	PASS	missense_variant	MODERATE	RNASET2	101080386	transcript	XM_023254571.1	protein_coding	7	c.397G>A	p.Gly133Ser
chrB2	152690098	G	C	PASS	missense_variant	MODERATE	FGFR1OP	101099885	transcript	XM_023254572.1	protein_coding	1	c.25G>C	p.Val9Leu
chrB2	152690098	G	C	PASS	missense_variant	MODERATE	FGFR1OP	101099885	transcript	XM_023254573.1	protein_coding	1	c.25G>C	p.Val9Leu
chrB2	152700652	A	G	PASS	missense_variant	MODERATE	FGFR1OP	101099885	transcript	XM_023254572.1	protein_coding	6	c.493A>G	p.Thr165Ala
chrB2	152700652	A	G	PASS	missense_variant	MODERATE	FGFR1OP	101099885	transcript	XM_023254573.1	protein_coding	6	c.493A>G	p.Thr165Ala
chrB2	152713410	A	G	PASS	missense_variant	MODERATE	FGFR1OP	101099885	transcript	XM_023254572.1	protein_coding	9	c.829A>G	p.Thr277Ala
chrB2	152713410	A	G	PASS	missense_variant	MODERATE	FGFR1OP	101099885	transcript	XM_023254573.1	protein_coding	8	c.769A>G	p.Thr257Ala
chrB2	152713446	T	G	PASS	missense_variant	MODERATE	FGFR1OP	101099885	transcript	XM_023254572.1	protein_coding	9	c.865T>G	p.Leu289Val
chrB2	152713446	T	G	PASS	missense_variant	MODERATE	FGFR1OP	101099885	transcript	XM_023254573.1	protein_coding	8	c.805T>G	p.Leu269Val
chrB2	152713481	CGGAGCCCCT	C	PASS	disruptive_inframe_deletion	MODERATE	FGFR1OP	101099885	transcript	XM_023254572.1	protein_coding	9	c.909_917delTGGAGCCCC	p.Gly304_Pro306del
chrB2	152713481	CGGAGCCCCT	C	PASS	disruptive_inframe_deletion	MODERATE	FGFR1OP	101099885	transcript	XM_023254573.1	protein_coding	8	c.849_857delTGGAGCCCC	p.Gly284_Pro286del
chrB2	152797650	T	C	PASS	missense_variant	MODERATE	CCR6	101100307	transcript	XM_011282547.3	protein_coding	3	c.508T>C	p.Phe170Leu
chrB2	152797650	T	C	PASS	missense_variant	MODERATE	CCR6	101100307	transcript	XM_023254575.1	protein_coding	3	c.508T>C	p.Phe170Leu
chrB2	152797650	T	C	PASS	missense_variant	MODERATE	CCR6	101100307	transcript	XM_023254574.1	protein_coding	3	c.508T>C	p.Phe170Leu
chrB2	152797728	C	T	PASS	missense_variant	MODERATE	CCR6	101100307	transcript	XM_011282547.3	protein_coding	3	c.586C>T	p.His196Tyr
chrB2	152797728	C	T	PASS	missense_variant	MODERATE	CCR6	101100307	transcript	XM_023254575.1	protein_coding	3	c.586C>T	p.His196Tyr
chrB2	152797728	C	T	PASS	missense_variant	MODERATE	CCR6	101100307	transcript	XM_023254574.1	protein_coding	3	c.586C>T	p.His196Tyr
chrB2	152797771	A	G	PASS	missense_variant	MODERATE	CCR6	101100307	transcript	XM_011282547.3	protein_coding	3	c.629A>G	p.Lys210Arg
chrB2	152797771	A	G	PASS	missense_variant	MODERATE	CCR6	101100307	transcript	XM_023254575.1	protein_coding	3	c.629A>G	p.Lys210Arg
chrB2	152797771	A	G	PASS	missense_variant	MODERATE	CCR6	101100307	transcript	XM_023254574.1	protein_coding	3	c.629A>G	p.Lys210Arg
chrB2	152797838	C	G	PASS	missense_variant	MODERATE	CCR6	101100307	transcript	XM_011282547.3	protein_coding	3	c.696C>G	p.Ile232Met
chrB2	152797838	C	G	PASS	missense_variant	MODERATE	CCR6	101100307	transcript	XM_023254575.1	protein_coding	3	c.696C>G	p.Ile232Met
chrB2	152797838	C	G	PASS	missense_variant	MODERATE	CCR6	101100307	transcript	XM_023254574.1	protein_coding	3	c.696C>G	p.Ile232Met
chrB2	152797849	T	C	PASS	missense_variant	MODERATE	CCR6	101100307	transcript	XM_011282547.3	protein_coding	3	c.707T>C	p.Met236Thr
chrB2	152797849	T	C	PASS	missense_variant	MODERATE	CCR6	101100307	transcript	XM_023254575.1	protein_coding	3	c.707T>C	p.Met236Thr
chrB2	152797849	T	C	PASS	missense_variant	MODERATE	CCR6	101100307	transcript	XM_023254574.1	protein_coding	3	c.707T>C	p.Met236Thr
chrB2	152797930	T	C	PASS	missense_variant	MODERATE	CCR6	101100307	transcript	XM_011282547.3	protein_coding	3	c.788T>C	p.Val263Ala
chrB2	152797930	T	C	PASS	missense_variant	MODERATE	CCR6	101100307	transcript	XM_023254575.1	protein_coding	3	c.788T>C	p.Val263Ala
chrB2	152797930	T	C	PASS	missense_variant	MODERATE	CCR6	101100307	transcript	XM_023254574.1	protein_coding	3	c.788T>C	p.Val263Ala
chrB2	152798110	A	G	PASS	missense_variant	MODERATE	CCR6	101100307	transcript	XM_011282547.3	protein_coding	3	c.968A>G	p.Lys323Arg
chrB2	152798110	A	G	PASS	missense_variant	MODERATE	CCR6	101100307	transcript	XM_023254575.1	protein_coding	3	c.968A>G	p.Lys323Arg
chrB2	152798110	A	G	PASS	missense_variant	MODERATE	CCR6	101100307	transcript	XM_023254574.1	protein_coding	3	c.968A>G	p.Lys323Arg
chrB2	152798173	C	T	PASS	missense_variant	MODERATE	CCR6	101100307	transcript	XM_011282547.3	protein_coding	3	c.1031C>T	p.Ala344Val
chrB2	152798173	C	T	PASS	missense_variant	MODERATE	CCR6	101100307	transcript	XM_023254575.1	protein_coding	3	c.1031C>T	p.Ala344Val
chrB2	152798173	C	T	PASS	missense_variant	MODERATE	CCR6	101100307	transcript	XM_023254574.1	protein_coding	3	c.1031C>T	p.Ala344Val
chrB2	152813037	T	G	PASS	missense_variant	MODERATE	GPR31	101080638	transcript	XM_003986719.3	protein_coding	1	c.1052A>C	p.Tyr351Ser
chrB2	152813071	G	A	PASS	missense_variant	MODERATE	GPR31	101080638	transcript	XM_003986719.3	protein_coding	1	c.1018C>T	p.His340Tyr
chrB2	152813220	G	A	PASS	missense_variant	MODERATE	GPR31	101080638	transcript	XM_003986719.3	protein_coding	1	c.869C>T	p.Ala290Val
chrB2	152813344	CG	C	PASS	frameshift_variant	HIGH	GPR31	101080638	transcript	XM_003986719.3	protein_coding	1	c.744delC	p.Phe248fs
chrB2	152813386	A	G	PASS	missense_variant	MODERATE	GPR31	101080638	transcript	XM_003986719.3	protein_coding	1	c.703T>C	p.Trp235Arg
chrB2	152813506	G	A	PASS	missense_variant	MODERATE	GPR31	101080638	transcript	XM_003986719.3	protein_coding	1	c.583C>T	p.Arg195Trp
chrB2	152813526	G	A	PASS	missense_variant	MODERATE	GPR31	101080638	transcript	XM_003986719.3	protein_coding	1	c.563C>T	p.Pro188Leu
chrB2	152813532	G	A	PASS	missense_variant	MODERATE	GPR31	101080638	transcript	XM_003986719.3	protein_coding	1	c.557C>T	p.Ala186Val
chrB2	152813667	TCG	T	PASS	frameshift_variant	HIGH	GPR31	101080638	transcript	XM_003986719.3	protein_coding	1	c.420_421delCG	p.His140fs
chrB2	152813672	G	GGA	PASS	frameshift_variant	HIGH	GPR31	101080638	transcript	XM_003986719.3	protein_coding	1	c.416_417insTC	p.His140fs
chrB2	152813695	A	G	PASS	missense_variant	MODERATE	GPR31	101080638	transcript	XM_003986719.3	protein_coding	1	c.394T>C	p.Phe132Leu
chrB2	152813784	AAGGGCCAC	A	PASS	frameshift_variant	HIGH	GPR31	101080638	transcript	XM_003986719.3	protein_coding	1	c.297_304delGTGGCCCT	p.Trp100fs
chrB2	152813841	G	A	PASS	missense_variant	MODERATE	GPR31	101080638	transcript	XM_003986719.3	protein_coding	1	c.248C>T	p.Pro83Leu
chrB2	152813884	C	A	PASS	missense_variant	MODERATE	GPR31	101080638	transcript	XM_003986719.3	protein_coding	1	c.205G>T	p.Gly69Cys
chrB2	152813892	C	G	PASS	missense_variant	MODERATE	GPR31	101080638	transcript	XM_003986719.3	protein_coding	1	c.197G>C	p.Gly66Ala
chrB2	152813929	C	T	PASS	missense_variant	MODERATE	GPR31	101080638	transcript	XM_003986719.3	protein_coding	1	c.160G>A	p.Gly54Arg
chrB2	152813931	C	T	PASS	missense_variant	MODERATE	GPR31	101080638	transcript	XM_003986719.3	protein_coding	1	c.158G>A	p.Arg53His
chrB2	152813970	G	A	PASS	missense_variant	MODERATE	GPR31	101080638	transcript	XM_003986719.3	protein_coding	1	c.119C>T	p.Ala40Val
chrB2	152814003	T	C	PASS	missense_variant	MODERATE	GPR31	101080638	transcript	XM_003986719.3	protein_coding	1	c.86A>G	p.Glu29Gly
chrB2	152864436	A	G	PASS	missense_variant	MODERATE	TTLL2	101080892	transcript	XM_023253561.1	protein_coding	1	c.392T>C	p.Val131Ala
chrB2	152864704	T	C	PASS	missense_variant	MODERATE	TTLL2	101080892	transcript	XM_023253561.1	protein_coding	1	c.124A>G	p.Ser42Gly
chrB2	152864815	C	T	PASS	missense_variant	MODERATE	TTLL2	101080892	transcript	XM_023253561.1	protein_coding	1	c.13G>A	p.Asp5Asn
chrB2	152864818	C	A	PASS	missense_variant	MODERATE	TTLL2	101080892	transcript	XM_023253561.1	protein_coding	1	c.10G>T	p.Asp4Tyr
chrB2	152864821	C	CTG	PASS	frameshift_variant	HIGH	TTLL2	101080892	transcript	XM_023253561.1	protein_coding	1	c.6_7insCA	p.Asp3fs
chrB2	152872804	A	G	PASS	splice_donor_variant&intron_variant	HIGH	LOC111560555	111560555	transcript	XR_002742557.1	pseudogene	2	n.6705+2T>C
chrB2	152884975	G	T	PASS	missense_variant	MODERATE	UNC93A	101081141	transcript	XM_023254577.1	protein_coding	9	c.1484C>A	p.Ala495Glu
chrB2	152884975	G	T	PASS	missense_variant	MODERATE	UNC93A	101081141	transcript	XM_003986720.5	protein_coding	9	c.1304C>A	p.Ala435Glu
chrB2	152884976	C	T	PASS	missense_variant	MODERATE	UNC93A	101081141	transcript	XM_023254577.1	protein_coding	9	c.1483G>A	p.Ala495Thr
chrB2	152884976	C	T	PASS	missense_variant	MODERATE	UNC93A	101081141	transcript	XM_003986720.5	protein_coding	9	c.1303G>A	p.Ala435Thr
chrB2	152885056	C	T	PASS	missense_variant	MODERATE	UNC93A	101081141	transcript	XM_023254577.1	protein_coding	9	c.1403G>A	p.Ser468Asn
chrB2	152885056	C	T	PASS	missense_variant	MODERATE	UNC93A	101081141	transcript	XM_003986720.5	protein_coding	9	c.1223G>A	p.Ser408Asn
chrB2	152885095	C	A	PASS	missense_variant	MODERATE	UNC93A	101081141	transcript	XM_023254577.1	protein_coding	9	c.1364G>T	p.Cys455Phe
chrB2	152885095	C	A	PASS	missense_variant	MODERATE	UNC93A	101081141	transcript	XM_003986720.5	protein_coding	9	c.1184G>T	p.Cys395Phe
chrB2	152896984	G	C	PASS	missense_variant	MODERATE	UNC93A	101081141	transcript	XM_023254577.1	protein_coding	6	c.980C>G	p.Thr327Ser
chrB2	152896984	G	C	PASS	missense_variant	MODERATE	UNC93A	101081141	transcript	XM_003986720.5	protein_coding	6	c.800C>G	p.Thr267Ser
chrB2	152897101	T	C	PASS	missense_variant	MODERATE	UNC93A	101081141	transcript	XM_023254577.1	protein_coding	6	c.863A>G	p.Asp288Gly
chrB2	152897101	T	C	PASS	missense_variant	MODERATE	UNC93A	101081141	transcript	XM_003986720.5	protein_coding	6	c.683A>G	p.Asp228Gly
chrB2	152903106	G	C	PASS	missense_variant	MODERATE	UNC93A	101081141	transcript	XM_023254577.1	protein_coding	4	c.478C>G	p.Leu160Val
chrB2	152903106	G	C	PASS	missense_variant	MODERATE	UNC93A	101081141	transcript	XM_003986720.5	protein_coding	4	c.298C>G	p.Leu100Val
chrB2	152910379	C	T	PASS	missense_variant	MODERATE	UNC93A	101081141	transcript	XM_023254577.1	protein_coding	2	c.205G>A	p.Val69Ile
chrB2	152910379	C	T	PASS	missense_variant	MODERATE	UNC93A	101081141	transcript	XM_003986720.5	protein_coding	2	c.25G>A	p.Val9Ile
chrB2	152910425	C	T	PASS	stop_gained	HIGH	UNC93A	101081141	transcript	XM_023254577.1	protein_coding	2	c.159G>A	p.Trp53*
chrB2	152921757	C	T	PASS	missense_variant	MODERATE	UNC93A	101081141	transcript	XM_023254577.1	protein_coding	1	c.59G>A	p.Arg20His
chrB2	152921785	G	A	PASS	missense_variant	MODERATE	UNC93A	101081141	transcript	XM_023254577.1	protein_coding	1	c.31C>T	p.Arg11Trp
chrC1	95465859	C	T	PASS	missense_variant	MODERATE	OVGP1	101094196	transcript	XM_023257812.1	protein_coding	6	c.760G>A	p.Val254Ile
chrC1	95465859	C	T	PASS	missense_variant	MODERATE	OVGP1	101094196	transcript	XM_023257811.1	protein_coding	6	c.772G>A	p.Val258Ile
chrC1	162030673	C	G	PASS	missense_variant	MODERATE	ERICH2	101088867	transcript	XM_023259448.1	protein_coding	2	c.389C>G	p.Pro130Arg
chrC1	162030673	C	G	PASS	missense_variant	MODERATE	ERICH2	101088867	transcript	XM_023259450.1	protein_coding	2	c.389C>G	p.Pro130Arg
chrC1	162030673	C	G	PASS	missense_variant	MODERATE	ERICH2	101088867	transcript	XM_023259451.1	protein_coding	2	c.389C>G	p.Pro130Arg
chrC1	162030673	C	G	PASS	missense_variant	MODERATE	ERICH2	101088867	transcript	XM_023259449.1	protein_coding	2	c.389C>G	p.Pro130Arg
chrC1	162030673	C	G	PASS	missense_variant	MODERATE	ERICH2	101088867	transcript	XM_019838243.2	protein_coding	1	c.175C>G	p.Pro59Ala
chrC1	162030673	C	G	PASS	missense_variant	MODERATE	ERICH2	101088867	transcript	XM_019838242.2	protein_coding	1	c.175C>G	p.Pro59Ala
chrC1	162671813	A	AT	PASS	frameshift_variant	HIGH	DCAF17	101089030	transcript	XM_023259453.1	protein_coding	12	c.1157dupT	p.Leu386fs
chrC2	9462582	G	A	PASS	missense_variant	MODERATE	LOC101084134	101084134	transcript	XM_003991446.4	protein_coding	3	c.740C>T	p.Pro247Leu
chrC2	9462716	C	A	PASS	missense_variant	MODERATE	LOC101084134	101084134	transcript	XM_003991446.4	protein_coding	3	c.606G>T	p.Met202Ile
chrC2	145522799	C	CAGA	PASS	conservative_inframe_insertion	MODERATE	LOC101086839	101086839	transcript	XM_023238572.1	protein_coding	2	c.502_504dupAAG	p.Lys168dup
chrD1	92177700	T	C	PASS	missense_variant	MODERATE	CD1H11orf74	101100001	transcript	XM_006937201.4	protein_coding	2	c.127T>C	p.Ser43Pro
chrD1	92177700	T	C	PASS	missense_variant	MODERATE	CD1H11orf74	101100001	transcript	XM_006937206.4	protein_coding	2	c.127T>C	p.Ser43Pro
chrD1	92177700	T	C	PASS	missense_variant	MODERATE	CD1H11orf74	101100001	transcript	XM_006937204.4	protein_coding	2	c.127T>C	p.Ser43Pro
chrD1	92177700	T	C	PASS	missense_variant	MODERATE	CD1H11orf74	101100001	transcript	XM_006937205.4	protein_coding	2	c.127T>C	p.Ser43Pro
chrD1	92177700	T	C	PASS	missense_variant	MODERATE	CD1H11orf74	101100001	transcript	XM_023239773.1	protein_coding	2	c.127T>C	p.Ser43Pro
chrD1	92177700	T	C	PASS	missense_variant	MODERATE	CD1H11orf74	101100001	transcript	XM_006937202.3	protein_coding	2	c.127T>C	p.Ser43Pro
chrD1	92177700	T	C	PASS	missense_variant	MODERATE	CD1H11orf74	101100001	transcript	XM_006937203.4	protein_coding	2	c.127T>C	p.Ser43Pro
chrD1	102390151	T	C	PASS	missense_variant	MODERATE	LOC111556539	111556539	transcript	XM_023239011.1	protein_coding	2	c.389T>C	p.Leu130Ser
chrD1	108320190	G	GGCCAGACACATTAATGTCA	PASS	frameshift_variant&stop_gained	HIGH	AHNAK	101087783	transcript	XM_023239943.1	protein_coding	7	c.6057_6058insTGACATTAATGTGTCTGGC	p.Pro2020fs
chrD1	108320196	T	G	PASS	missense_variant	MODERATE	AHNAK	101087783	transcript	XM_023239943.1	protein_coding	7	c.6052A>C	p.Lys2018Gln
chrE1	47852028	G	GT	PASS	frameshift_variant	HIGH	LOC101083124	101083124	transcript	XM_023244023.1	protein_coding	12	c.1489dupT	p.Cys497fs
chrE1	58122028	C	T	PASS	missense_variant	MODERATE	QRICH2	101097437	transcript	XM_023244032.1	protein_coding	5	c.3544G>A	p.Gly1182Ser
chrE1	59229247	C	T,*	PASS	splice_donor_variant&intron_variant	HIGH	LOC102900882	102900882	transcript	XR_002738236.1	pseudogene	2	n.394+1G>A
chrE3	42092098	G	C	PASS	missense_variant	MODERATE	MMP25	101097941	transcript	XM_023246956.1	protein_coding	3	c.229C>G	p.Leu77Val
chrF1	24255471	G	C	PASS	missense_variant	MODERATE	PRG4	101085684	transcript	XM_023247798.1	protein_coding	10	c.2475C>G	p.Ile825Met
chrF1	68462059	G	C	PASS	missense_variant	MODERATE	LOC101100784	101100784	transcript	XM_023247474.1	protein_coding	3	c.524C>G	p.Pro175Arg
NW_019365546.1	6386	C	T	PASS	missense_variant	MODERATE	LOC111559167	111559167	transcript	XM_023249729.1	protein_coding	6	c.1028C>T	p.Ala343Val
NW_019365546.1	6416	G	A	PASS	missense_variant	MODERATE	LOC111559167	111559167	transcript	XM_023249729.1	protein_coding	6	c.1058G>A	p.Arg353His

## Sheet: priv.het.prot.chang.var. case 1
Table S4. 2901 protein changing private variants in the sequenced Bengal cat (case no. 1) with EDS. Private variants were obtained by filtering all variants that were present at least once in 54 control genomes. Variants are listed multiple times, if they have predicted effects on more than one transcript. Variants with a SnpEff predicted impact of "high" or "moderate" were considered protein cha…
#CHROM	POS	REF	ALT	FILTER	EFFECT	IMPACT	GENE	GENEID	FEATURE	FEATUREID	BIOTYPE	RANK	HGVS_C	HGVS_P
chrA1	6922183	G	C	PASS	missense_variant	MODERATE	LOC111559476	111559476	transcript	XM_023250247.1	protein_coding	1	c.197G>C	p.Arg66Pro
chrA1	6922401	T	C	PASS	missense_variant	MODERATE	LOC111559476	111559476	transcript	XM_023250247.1	protein_coding	1	c.415T>C	p.Ser139Pro
chrA1	19417144	G	A	QD2	missense_variant	MODERATE	CKAP2	101097367	transcript	XM_011284205.3	protein_coding	4	c.319G>A	p.Glu107Lys
chrA1	88200386	A	T	QD2	start_lost	HIGH	OBSCN	101101539	transcript	XM_023253724.1	protein_coding	2	c.2T>A	p.Met1?
chrA1	138492811	T	C	PASS	missense_variant	MODERATE	NAIP	101090330	transcript	XM_019835218.1	protein_coding	10	c.1397T>C	p.Met466Thr
chrA1	138492922	A	G	PASS	missense_variant	MODERATE	NAIP	101090330	transcript	XM_019835218.1	protein_coding	10	c.1508A>G	p.Tyr503Cys
chrA1	138494297	T	A	PASS	missense_variant	MODERATE	NAIP	101090330	transcript	XM_019835218.1	protein_coding	10	c.2883T>A	p.Asp961Glu
chrA1	138614912	A	C	PASS	missense_variant	MODERATE	BDP1	101095226	transcript	XM_011283883.2	protein_coding	17	c.3560A>C	p.Glu1187Ala
chrA1	138614912	A	C	PASS	missense_variant	MODERATE	BDP1	101095226	transcript	XM_019835223.2	protein_coding	20	c.3560A>C	p.Glu1187Ala
chrA1	138614912	A	C	PASS	missense_variant	MODERATE	BDP1	101095226	transcript	XM_019835227.2	protein_coding	20	c.3560A>C	p.Glu1187Ala
chrA1	138614912	A	C	PASS	missense_variant	MODERATE	BDP1	101095226	transcript	XM_019835230.2	protein_coding	18	c.3560A>C	p.Glu1187Ala
chrA1	138614912	A	C	PASS	missense_variant	MODERATE	BDP1	101095226	transcript	XM_019835246.2	protein_coding	17	c.3560A>C	p.Glu1187Ala
chrA1	138614912	A	C	PASS	missense_variant	MODERATE	BDP1	101095226	transcript	XM_019835240.2	protein_coding	17	c.3557A>C	p.Glu1186Ala
chrA1	138614912	A	C	PASS	missense_variant	MODERATE	BDP1	101095226	transcript	XM_019835244.2	protein_coding	17	c.3560A>C	p.Glu1187Ala
chrA1	138619912	G	T	PASS	missense_variant	MODERATE	BDP1	101095226	transcript	XM_011283883.2	protein_coding	20	c.4366G>T	p.Val1456Leu
chrA1	138619912	G	T	PASS	missense_variant	MODERATE	BDP1	101095226	transcript	XM_019835223.2	protein_coding	23	c.4366G>T	p.Val1456Leu
chrA1	138619912	G	T	PASS	missense_variant	MODERATE	BDP1	101095226	transcript	XM_019835227.2	protein_coding	23	c.4366G>T	p.Val1456Leu
chrA1	138619912	G	T	PASS	missense_variant	MODERATE	BDP1	101095226	transcript	XM_019835230.2	protein_coding	21	c.4366G>T	p.Val1456Leu
chrA1	138619912	G	T	PASS	missense_variant	MODERATE	BDP1	101095226	transcript	XM_019835246.2	protein_coding	20	c.4366G>T	p.Val1456Leu
chrA1	138619912	G	T	PASS	missense_variant	MODERATE	BDP1	101095226	transcript	XM_019835240.2	protein_coding	20	c.4363G>T	p.Val1455Leu
chrA1	138619912	G	T	PASS	missense_variant	MODERATE	BDP1	101095226	transcript	XM_019835244.2	protein_coding	20	c.4366G>T	p.Val1456Leu
chrA1	138651926	A	T	PASS	missense_variant	MODERATE	BDP1	101095226	transcript	XM_011283883.2	protein_coding	37	c.7323A>T	p.Leu2441Phe
chrA1	138651926	A	T	PASS	missense_variant	MODERATE	BDP1	101095226	transcript	XM_019835223.2	protein_coding	40	c.7323A>T	p.Leu2441Phe
chrA1	138651926	A	T	PASS	missense_variant	MODERATE	BDP1	101095226	transcript	XM_019835227.2	protein_coding	40	c.7323A>T	p.Leu2441Phe
chrA1	138651926	A	T	PASS	missense_variant	MODERATE	BDP1	101095226	transcript	XM_019835230.2	protein_coding	38	c.7323A>T	p.Leu2441Phe
chrA1	138651926	A	T	PASS	missense_variant	MODERATE	BDP1	101095226	transcript	XM_019835240.2	protein_coding	37	c.7320A>T	p.Leu2440Phe
chrA1	138651926	A	T	PASS	missense_variant	MODERATE	BDP1	101095226	transcript	XM_019835244.2	protein_coding	37	c.7254A>T	p.Leu2418Phe
chrA1	175552893	C	T	PASS	missense_variant	MODERATE	NSD1	101100618	transcript	XM_006927884.4	protein_coding	5	c.1405G>A	p.Asp469Asn
chrA1	175552893	C	T	PASS	missense_variant	MODERATE	NSD1	101100618	transcript	XM_023259150.1	protein_coding	6	c.598G>A	p.Asp200Asn
chrA1	175552893	C	T	PASS	missense_variant	MODERATE	NSD1	101100618	transcript	XM_023259132.1	protein_coding	5	c.1405G>A	p.Asp469Asn
chrA1	175552893	C	T	PASS	missense_variant	MODERATE	NSD1	101100618	transcript	XM_023259134.1	protein_coding	6	c.598G>A	p.Asp200Asn
chrA1	175552893	C	T	PASS	missense_variant	MODERATE	NSD1	101100618	transcript	XM_023259129.1	protein_coding	5	c.1405G>A	p.Asp469Asn
chrA1	175552893	C	T	PASS	missense_variant	MODERATE	NSD1	101100618	transcript	XM_023259154.1	protein_coding	6	c.598G>A	p.Asp200Asn
chrA1	175552893	C	T	PASS	missense_variant	MODERATE	NSD1	101100618	transcript	XM_023259133.1	protein_coding	5	c.1405G>A	p.Asp469Asn
chrA1	175552893	C	T	PASS	missense_variant	MODERATE	NSD1	101100618	transcript	XM_019838275.2	protein_coding	6	c.598G>A	p.Asp200Asn
chrA1	181729493	A	G	PASS	missense_variant	MODERATE	DOCK2	101097544	transcript	XM_003981290.3	protein_coding	18	c.1766T>C	p.Val589Ala
chrA1	182974930	C	G	PASS	missense_variant	MODERATE	WWC1	101092738	transcript	XM_023259830.1	protein_coding	12	c.1843G>C	p.Val615Leu
chrA1	182974930	C	G	PASS	missense_variant	MODERATE	WWC1	101092738	transcript	XM_023259831.1	protein_coding	11	c.1576G>C	p.Val526Leu
chrA1	198357035	G	C	PASS	missense_variant	MODERATE	LOC101085183	101085183	transcript	XM_019810527.2	protein_coding	3	c.246C>G	p.Ile82Met
chrA1	198839530	C	G	PASS	missense_variant	MODERATE	TCOF1	101083909	transcript	XM_006927991.4	protein_coding	12	c.1573G>C	p.Gly525Arg
chrA1	205537246	C	T	PASS	missense_variant	MODERATE	LOC105260991	105260991	transcript	XM_019811152.2	protein_coding	1	c.211C>T	p.Pro71Ser
chrA1	205537262	A	C	PASS	missense_variant	MODERATE	LOC105260991	105260991	transcript	XM_019811152.2	protein_coding	1	c.227A>C	p.His76Pro
chrA1	205537264	T	C	PASS	missense_variant	MODERATE	LOC105260991	105260991	transcript	XM_019811152.2	protein_coding	1	c.229T>C	p.Ser77Pro
chrA1	205537277	C	T	QD2	missense_variant	MODERATE	LOC105260991	105260991	transcript	XM_019811152.2	protein_coding	1	c.242C>T	p.Pro81Leu
chrA1	205537591	G	A	QD2	missense_variant	MODERATE	LOC105260991	105260991	transcript	XM_019811152.2	protein_coding	1	c.556G>A	p.Val186Ile
chrA1	209302769	T	C	PASS	splice_acceptor_variant&intron_variant	HIGH	LOC109491896	109491896	transcript	XR_002145479.2	pseudogene	2	n.417-2A>G
chrA2	816520	A	C	PASS	missense_variant	MODERATE	LOC101086040	101086040	transcript	XM_023242871.1	protein_coding	5	c.375A>C	p.Glu125Asp
chrA2	901422	TCCTCCCCGG	T	PASS	disruptive_inframe_deletion	MODERATE	APC2	101097211	transcript	XM_023242913.1	protein_coding	15	c.5654_5662delCGGCCTCCC	p.Pro1885_Ser1887del
chrA2	901422	TCCTCCCCGG	T	PASS	disruptive_inframe_deletion	MODERATE	APC2	101097211	transcript	XM_023242922.1	protein_coding	15	c.5651_5659delCGGCCTCCC	p.Pro1884_Ser1886del
chrA2	901422	TCCTCCCCGG	T	PASS	disruptive_inframe_deletion	MODERATE	APC2	101097211	transcript	XM_023242923.1	protein_coding	15	c.5582_5590delCGGCCTCCC	p.Pro1861_Ser1863del
chrA2	902635	C	G	PASS	missense_variant	MODERATE	APC2	101097211	transcript	XM_023242913.1	protein_coding	15	c.6851C>G	p.Ala2284Gly
chrA2	902635	C	G	PASS	missense_variant	MODERATE	APC2	101097211	transcript	XM_023242922.1	protein_coding	15	c.6848C>G	p.Ala2283Gly
chrA2	902635	C	G	PASS	missense_variant	MODERATE	APC2	101097211	transcript	XM_023242923.1	protein_coding	15	c.6779C>G	p.Ala2260Gly
chrA2	912632	G	A	PASS	missense_variant	MODERATE	PCSK4	101097704	transcript	XM_023242932.1	protein_coding	12	c.1703C>T	p.Ser568Leu
chrA2	912632	G	A	PASS	missense_variant	MODERATE	PCSK4	101097704	transcript	XM_023242936.1	protein_coding	12	c.1703C>T	p.Ser568Leu
chrA2	912632	G	A	PASS	missense_variant	MODERATE	PCSK4	101097704	transcript	XM_023242938.1	protein_coding	12	c.1664C>T	p.Ser555Leu
chrA2	912632	G	A	PASS	missense_variant	MODERATE	PCSK4	101097704	transcript	XM_023242943.1	protein_coding	12	c.1703C>T	p.Ser568Leu
chrA2	912632	G	A	PASS	missense_variant	MODERATE	PCSK4	101097704	transcript	XM_023242946.1	protein_coding	12	c.1664C>T	p.Ser555Leu
chrA2	912632	G	A	PASS	missense_variant	MODERATE	PCSK4	101097704	transcript	XM_023242952.1	protein_coding	12	c.1703C>T	p.Ser568Leu
chrA2	912632	G	A	PASS	missense_variant	MODERATE	PCSK4	101097704	transcript	XM_023242954.1	protein_coding	12	c.1703C>T	p.Ser568Leu
chrA2	917423	C	CA	PASS	frameshift_variant	HIGH	PCSK4	101097704	transcript	XM_023242932.1	protein_coding	1	c.70_71insT	p.Gly24fs
chrA2	917423	C	CA	PASS	frameshift_variant	HIGH	PCSK4	101097704	transcript	XM_023242936.1	protein_coding	1	c.70_71insT	p.Gly24fs
chrA2	917423	C	CA	PASS	frameshift_variant	HIGH	PCSK4	101097704	transcript	XM_023242938.1	protein_coding	1	c.70_71insT	p.Gly24fs
chrA2	917423	C	CA	PASS	frameshift_variant	HIGH	PCSK4	101097704	transcript	XM_023242943.1	protein_coding	1	c.70_71insT	p.Gly24fs
chrA2	917423	C	CA	PASS	frameshift_variant	HIGH	PCSK4	101097704	transcript	XM_023242946.1	protein_coding	1	c.70_71insT	p.Gly24fs
chrA2	917423	C	CA	PASS	frameshift_variant	HIGH	PCSK4	101097704	transcript	XM_023242952.1	protein_coding	1	c.70_71insT	p.Gly24fs
chrA2	917423	C	CA	PASS	frameshift_variant	HIGH	PCSK4	101097704	transcript	XM_023242954.1	protein_coding	1	c.70_71insT	p.Gly24fs
chrA2	917424	C	CCT	PASS	frameshift_variant	HIGH	PCSK4	101097704	transcript	XM_023242932.1	protein_coding	1	c.69_70insAG	p.Gly24fs
chrA2	917424	C	CCT	PASS	frameshift_variant	HIGH	PCSK4	101097704	transcript	XM_023242936.1	protein_coding	1	c.69_70insAG	p.Gly24fs
chrA2	917424	C	CCT	PASS	frameshift_variant	HIGH	PCSK4	101097704	transcript	XM_023242938.1	protein_coding	1	c.69_70insAG	p.Gly24fs
chrA2	917424	C	CCT	PASS	frameshift_variant	HIGH	PCSK4	101097704	transcript	XM_023242943.1	protein_coding	1	c.69_70insAG	p.Gly24fs
chrA2	917424	C	CCT	PASS	frameshift_variant	HIGH	PCSK4	101097704	transcript	XM_023242946.1	protein_coding	1	c.69_70insAG	p.Gly24fs
chrA2	917424	C	CCT	PASS	frameshift_variant	HIGH	PCSK4	101097704	transcript	XM_023242952.1	protein_coding	1	c.69_70insAG	p.Gly24fs
chrA2	917424	C	CCT	PASS	frameshift_variant	HIGH	PCSK4	101097704	transcript	XM_023242954.1	protein_coding	1	c.69_70insAG	p.Gly24fs
chrA2	6777502	G	A	PASS	missense_variant	MODERATE	LOC111557120	111557120	transcript	XM_023240926.1	protein_coding	1	c.2636C>T	p.Ser879Phe
chrA2	6777503	A	T	PASS	missense_variant	MODERATE	LOC111557120	111557120	transcript	XM_023240926.1	protein_coding	1	c.2635T>A	p.Ser879Thr
chrA2	6778508	C	G	PASS	missense_variant	MODERATE	LOC111557120	111557120	transcript	XM_023240926.1	protein_coding	1	c.1630G>C	p.Glu544Gln
chrA2	6778595	A	T	PASS	missense_variant	MODERATE	LOC111557120	111557120	transcript	XM_023240926.1	protein_coding	1	c.1543T>A	p.Ser515Thr
chrA2	7689101	A	ATGTCCGGGCCAACATGCTGGCCCCGTTGGCGAACAGCTGAAGGAGAACCCAGG	QD2	frameshift_variant	HIGH	DNMT1	101093502	transcript	XM_023245156.1	protein_coding	36	c.4315_4316insCCTGGGTTCTCCTTCAGCTGTTCGCCAACGGGGCCAGCATGTTGGCCCGGACA	p.Ile1439fs
chrA2	7689101	A	ATGTCCGGGCCAACATGCTGGCCCCGTTGGCGAACAGCTGAAGGAGAACCCAGG	QD2	frameshift_variant	HIGH	DNMT1	101093502	transcript	XM_019817312.1	protein_coding	34	c.3952_3953insCCTGGGTTCTCCTTCAGCTGTTCGCCAACGGGGCCAGCATGTTGGCCCGGACA	p.Ile1318fs
chrA2	7689101	A	ATGTCCGGGCCAACATGCTGGCCCCGTTGGCGAACAGCTGAAGGAGAACCCAGG	QD2	frameshift_variant	HIGH	DNMT1	101093502	transcript	XM_006928387.4	protein_coding	36	c.4279_4280insCCTGGGTTCTCCTTCAGCTGTTCGCCAACGGGGCCAGCATGTTGGCCCGGACA	p.Ile1427fs
chrA2	7689101	A	ATGTCCGGGCCAACATGCTGGCCCCGTTGGCGAACAGCTGAAGGAGAACCCAGG	QD2	frameshift_variant	HIGH	DNMT1	101093502	transcript	XM_023245159.1	protein_coding	36	c.4291_4292insCCTGGGTTCTCCTTCAGCTGTTCGCCAACGGGGCCAGCATGTTGGCCCGGACA	p.Ile1431fs
chrA2	11783091	T	C	QD2	missense_variant	MODERATE	LOC101091766	101091766	transcript	XM_003982015.2	protein_coding	1	c.350T>C	p.Met117Thr
chrA2	11783092	G	C	QD2	missense_variant	MODERATE	LOC101091766	101091766	transcript	XM_003982015.2	protein_coding	1	c.351G>C	p.Met117Ile
chrA2	16329456	G	C	PASS	missense_variant	MODERATE	PTH1R	101095960	transcript	XM_023248158.1	protein_coding	9	c.830G>C	p.Gly277Ala
chrA2	38643719	A	T	PASS	splice_acceptor_variant&intron_variant	HIGH	LOC102900768	102900768	transcript	XM_023241872.1	protein_coding	1	c.346-2A>T
chrA2	62405573	G	A	PASS	missense_variant	MODERATE	POLD2	101095089	transcript	XM_003982577.5	protein_coding	10	c.1175C>T	p.Pro392Leu
chrA2	62405573	G	A	PASS	missense_variant	MODERATE	POLD2	101095089	transcript	XM_006929050.4	protein_coding	10	c.1175C>T	p.Pro392Leu
chrA2	62405573	G	A	PASS	missense_variant	MODERATE	POLD2	101095089	transcript	XM_023250111.1	protein_coding	10	c.1175C>T	p.Pro392Leu
chrA2	62405573	G	A	PASS	missense_variant	MODERATE	POLD2	101095089	transcript	XM_006929051.4	protein_coding	10	c.1175C>T	p.Pro392Leu
chrA2	62712688	A	AC	PASS	frameshift_variant	HIGH	DDX56	101099362	transcript	XM_003982594.4	protein_coding	14	c.1633dupG	p.Val545fs
chrA2	62712694	G	T	QD2	missense_variant	MODERATE	DDX56	101099362	transcript	XM_003982594.4	protein_coding	14	c.1628C>A	p.Thr543Asn
chrA2	62712704	G	A	PASS	missense_variant	MODERATE	DDX56	101099362	transcript	XM_003982594.4	protein_coding	14	c.1618C>T	p.Arg540Cys
chrA2	62712730	C	G	PASS	missense_variant	MODERATE	DDX56	101099362	transcript	XM_003982594.4	protein_coding	14	c.1592G>C	p.Arg531Pro
chrA2	62712736	G	A	PASS	missense_variant	MODERATE	DDX56	101099362	transcript	XM_003982594.4	protein_coding	14	c.1586C>T	p.Pro529Leu
chrA2	62712742	C	T	PASS	missense_variant	MODERATE	DDX56	101099362	transcript	XM_003982594.4	protein_coding	14	c.1580G>A	p.Arg527Gln
chrA2	64899740	G	A	PASS	missense_variant	MODERATE	ABCA13	101082477	transcript	XM_023241981.1	protein_coding	59	c.14932G>A	p.Val4978Met
chrA2	85937168	T	C	PASS	missense_variant	MODERATE	LOC111557341	111557341	transcript	XM_023242045.1	protein_coding	4	c.1438A>G	p.Ile480Val
chrA2	85937419	T	C	PASS	missense_variant	MODERATE	LOC111557341	111557341	transcript	XM_023242045.1	protein_coding	4	c.1187A>G	p.Gln396Arg
chrA2	85937534	T	C	PASS	missense_variant	MODERATE	LOC111557341	111557341	transcript	XM_023242045.1	protein_coding	4	c.1072A>G	p.Ser358Gly
chrA2	85937597	A	G	PASS	missense_variant	MODERATE	LOC111557341	111557341	transcript	XM_023242045.1	protein_coding	3	c.1010T>C	p.Val337Ala
chrA2	85937613	G	A	PASS	missense_variant	MODERATE	LOC111557341	111557341	transcript	XM_023242045.1	protein_coding	3	c.994C>T	p.Arg332Cys
chrA2	85937837	T	C	PASS	missense_variant	MODERATE	LOC111557341	111557341	transcript	XM_023242045.1	protein_coding	3	c.770A>G	p.Gln257Arg
chrA2	85937912	G	A	PASS	missense_variant	MODERATE	LOC111557341	111557341	transcript	XM_023242045.1	protein_coding	3	c.695C>T	p.Ala232Val
chrA2	85938095	C	T	PASS	missense_variant	MODERATE	LOC111557341	111557341	transcript	XM_023242045.1	protein_coding	3	c.512G>A	p.Ser171Asn
chrA2	85938096	T	C	PASS	missense_variant	MODERATE	LOC111557341	111557341	transcript	XM_023242045.1	protein_coding	3	c.511A>G	p.Ser171Gly
chrA2	85938201	T	C	PASS	missense_variant	MODERATE	LOC111557341	111557341	transcript	XM_023242045.1	protein_coding	3	c.406A>G	p.Arg136Gly
chrA2	85938808	A	G	QD2	missense_variant	MODERATE	LOC111557341	111557341	transcript	XM_023242045.1	protein_coding	1	c.145T>C	p.Tyr49His
chrA2	85938811	C	T	PASS	missense_variant	MODERATE	LOC111557341	111557341	transcript	XM_023242045.1	protein_coding	1	c.142G>A	p.Asp48Asn
chrA2	85938870	C	T	PASS	missense_variant	MODERATE	LOC111557341	111557341	transcript	XM_023242045.1	protein_coding	1	c.83G>A	p.Arg28Gln
chrA2	168243632	T	G	PASS	missense_variant	MODERATE	PAXIP1	101087392	transcript	XM_023242347.1	protein_coding	8	c.1520A>C	p.Gln507Pro
chrA3	4345975	T	C	PASS	missense_variant	MODERATE	ZNF831	101087468	transcript	XM_019826291.2	protein_coding	3	c.3739A>G	p.Lys1247Glu
chrA3	4345975	T	C	PASS	missense_variant	MODERATE	ZNF831	101087468	transcript	XM_019826290.2	protein_coding	4	c.3724A>G	p.Lys1242Glu
chrA3	4345975	T	C	PASS	missense_variant	MODERATE	ZNF831	101087468	transcript	XM_023251056.1	protein_coding	4	c.3739A>G	p.Lys1247Glu
chrA3	4348020	G	T	PASS	missense_variant	MODERATE	ZNF831	101087468	transcript	XM_019826291.2	protein_coding	2	c.2735C>A	p.Thr912Asn
chrA3	4348020	G	T	PASS	missense_variant	MODERATE	ZNF831	101087468	transcript	XM_019826290.2	protein_coding	3	c.2735C>A	p.Thr912Asn
chrA3	4348020	G	T	PASS	missense_variant	MODERATE	ZNF831	101087468	transcript	XM_023251056.1	protein_coding	3	c.2735C>A	p.Thr912Asn
chrA3	4665053	G	A	PASS	missense_variant	MODERATE	LOC101098453	101098453	transcript	XM_023251063.1	protein_coding	1	c.656C>T	p.Pro219Leu
chrA3	27154136	T	G	PASS	missense_variant	MODERATE	LOC101080774	101080774	transcript	XM_023251355.1	protein_coding	9	c.1136T>G	p.Val379Gly
chrA3	103889842	C	T	PASS	missense_variant	MODERATE	LOC101098787	101098787	transcript	XM_023252190.1	protein_coding	1	c.403G>A	p.Glu135Lys
chrA3	130257747	T	C	PASS	missense_variant	MODERATE	LOC111559873	111559873	transcript	XM_023252086.1	protein_coding	1	c.524A>G	p.Tyr175Cys
chrB1	6288352	CTG	C	PASS	frameshift_variant	HIGH	MCPH1	493941	transcript	NM_001009348.1	protein_coding	8	c.852_853delTG	p.Ala285fs
chrB1	6288355	CTGGTCCTTCAGCTTCTCTAAAGACCGGTAGTGTTCATTCATCGGCACCT	C	PASS	frameshift_variant	HIGH	MCPH1	493941	transcript	NM_001009348.1	protein_coding	8	c.855_903delTGGTCCTTCAGCTTCTCTAAAGACCGGTAGTGTTCATTCATCGGCACCT	p.Gly286fs
chrB1	7060425	C	T	PASS	missense_variant	MODERATE	LOC109499336	109499336	transcript	XM_023252246.1	protein_coding	2	c.538C>T	p.Arg180Cys
chrB1	7117092	C	T	PASS	missense_variant	MODERATE	LOC105260280	105260280	transcript	XM_011280069.2	protein_coding	1	c.1066G>A	p.Ala356Thr
chrB1	7117541	T	C	QD2	missense_variant	MODERATE	LOC105260280	105260280	transcript	XM_011280069.2	protein_coding	1	c.617A>G	p.Gln206Arg
chrB1	16617592	A	C	PASS	missense_variant	MODERATE	SORBS2	101093349	transcript	XM_023252324.1	protein_coding	7	c.685T>G	p.Trp229Gly
chrB1	16617592	A	C	PASS	missense_variant	MODERATE	SORBS2	101093349	transcript	XM_019830038.2	protein_coding	7	c.685T>G	p.Trp229Gly
chrB1	16617592	A	C	PASS	missense_variant	MODERATE	SORBS2	101093349	transcript	XM_019830039.2	protein_coding	7	c.685T>G	p.Trp229Gly
chrB1	16617592	A	C	PASS	missense_variant	MODERATE	SORBS2	101093349	transcript	XM_019830023.2	protein_coding	7	c.685T>G	p.Trp229Gly
chrB1	16617592	A	C	PASS	missense_variant	MODERATE	SORBS2	101093349	transcript	XM_019830025.2	protein_coding	7	c.685T>G	p.Trp229Gly
chrB1	16617592	A	C	PASS	missense_variant	MODERATE	SORBS2	101093349	transcript	XM_023252325.1	protein_coding	7	c.685T>G	p.Trp229Gly
chrB1	16617592	A	C	PASS	missense_variant	MODERATE	SORBS2	101093349	transcript	XM_023252353.1	protein_coding	7	c.685T>G	p.Trp229Gly
chrB1	16617592	A	C	PASS	missense_variant	MODERATE	SORBS2	101093349	transcript	XM_023252329.1	protein_coding	6	c.592T>G	p.Trp198Gly
chrB1	16617592	A	C	PASS	missense_variant	MODERATE	SORBS2	101093349	transcript	XM_023252330.1	protein_coding	6	c.523T>G	p.Trp175Gly
chrB1	16617592	A	C	PASS	missense_variant	MODERATE	SORBS2	101093349	transcript	XM_023252328.1	protein_coding	7	c.685T>G	p.Trp229Gly
chrB1	16617592	A	C	PASS	missense_variant	MODERATE	SORBS2	101093349	transcript	XM_023252326.1	protein_coding	6	c.643T>G	p.Trp215Gly
chrB1	16617592	A	C	PASS	missense_variant	MODERATE	SORBS2	101093349	transcript	XM_023252327.1	protein_coding	7	c.616T>G	p.Trp206Gly
chrB1	66975332	C	G	QD2	missense_variant	MODERATE	LOC111560221	111560221	transcript	XM_023253391.1	protein_coding	1	c.352G>C	p.Glu118Gln
chrB1	124398686	C	T	PASS	stop_gained	HIGH	LOC102902241	102902241	transcript	XM_006930945.4	protein_coding	1	c.4921C>T	p.Arg1641*
chrB1	157544200	T	G	PASS	splice_donor_variant&intron_variant	HIGH	LOC109499146	109499146	transcript	XR_002156313.2	pseudogene	1	n.1769+2T>G
chrB1	198229008	A	G	PASS	missense_variant	MODERATE	BOD1L1	101092265	transcript	XM_019829965.2	protein_coding	10	c.2012A>G	p.Asp671Gly
chrB1	198229008	A	G	PASS	missense_variant	MODERATE	BOD1L1	101092265	transcript	XM_023253306.1	protein_coding	10	c.2012A>G	p.Asp671Gly
chrB2	4313098	G	A	PASS	missense_variant	MODERATE	SLC17A4	101085718	transcript	XM_023253587.1	protein_coding	12	c.1504C>T	p.Arg502Cys
chrB2	4313098	G	A	PASS	missense_variant	MODERATE	SLC17A4	101085718	transcript	XM_023253589.1	protein_coding	11	c.1252C>T	p.Arg418Cys
chrB2	23465323	C	G	PASS	missense_variant	MODERATE	FARS2	101081296	transcript	XM_019830281.2	protein_coding	6	c.648G>C	p.Gln216His
chrB2	23465323	C	G	PASS	missense_variant	MODERATE	FARS2	101081296	transcript	XM_019830295.2	protein_coding	6	c.648G>C	p.Gln216His
chrB2	23465323	C	G	PASS	missense_variant	MODERATE	FARS2	101081296	transcript	XM_019830299.2	protein_coding	6	c.648G>C	p.Gln216His
chrB2	23465323	C	G	PASS	missense_variant	MODERATE	FARS2	101081296	transcript	XM_019830296.2	protein_coding	6	c.648G>C	p.Gln216His
chrB2	23465323	C	G	PASS	missense_variant	MODERATE	FARS2	101081296	transcript	XM_011282158.3	protein_coding	6	c.648G>C	p.Gln216His
chrB2	23465323	C	G	PASS	missense_variant	MODERATE	FARS2	101081296	transcript	XM_019830292.2	protein_coding	6	c.648G>C	p.Gln216His
chrB2	23465323	C	G	PASS	missense_variant	MODERATE	FARS2	101081296	transcript	XM_019830297.2	protein_coding	6	c.648G>C	p.Gln216His
chrB2	23465323	C	G	PASS	missense_variant	MODERATE	FARS2	101081296	transcript	XM_019830282.2	protein_coding	5	c.648G>C	p.Gln216His
chrB2	23465323	C	G	PASS	missense_variant	MODERATE	FARS2	101081296	transcript	XM_019830283.2	protein_coding	6	c.648G>C	p.Gln216His
chrB2	23465323	C	G	PASS	missense_variant	MODERATE	FARS2	101081296	transcript	XM_019830284.2	protein_coding	7	c.648G>C	p.Gln216His
chrB2	23465323	C	G	PASS	missense_variant	MODERATE	FARS2	101081296	transcript	XM_019830287.2	protein_coding	6	c.648G>C	p.Gln216His
chrB2	23465323	C	G	PASS	missense_variant	MODERATE	FARS2	101081296	transcript	XM_019830288.2	protein_coding	5	c.648G>C	p.Gln216His
chrB2	23465323	C	G	PASS	missense_variant	MODERATE	FARS2	101081296	transcript	XM_019830290.2	protein_coding	4	c.648G>C	p.Gln216His
chrB2	23465323	C	G	PASS	missense_variant	MODERATE	FARS2	101081296	transcript	XM_019830291.2	protein_coding	6	c.648G>C	p.Gln216His
chrB2	23465323	C	G	PASS	missense_variant	MODERATE	FARS2	101081296	transcript	XM_019830286.2	protein_coding	6	c.648G>C	p.Gln216His
chrB2	23465323	C	G	PASS	missense_variant	MODERATE	FARS2	101081296	transcript	XM_019830285.1	protein_coding	6	c.648G>C	p.Gln216His
chrB2	23465323	C	G	PASS	missense_variant	MODERATE	FARS2	101081296	transcript	XM_019830294.2	protein_coding	6	c.648G>C	p.Gln216His
chrB2	23465323	C	G	PASS	missense_variant	MODERATE	FARS2	101081296	transcript	XM_023253710.1	protein_coding	6	c.648G>C	p.Gln216His
chrB2	23465323	C	G	PASS	missense_variant	MODERATE	FARS2	101081296	transcript	XM_023253711.1	protein_coding	6	c.648G>C	p.Gln216His
chrB2	23508750	A	C	PASS	missense_variant	MODERATE	FARS2	101081296	transcript	XM_019830281.2	protein_coding	5	c.90T>G	p.His30Gln
chrB2	23508750	A	C	PASS	missense_variant	MODERATE	FARS2	101081296	transcript	XM_019830295.2	protein_coding	5	c.90T>G	p.His30Gln
chrB2	23508750	A	C	PASS	missense_variant	MODERATE	FARS2	101081296	transcript	XM_019830299.2	protein_coding	5	c.90T>G	p.His30Gln
chrB2	23508750	A	C	PASS	missense_variant	MODERATE	FARS2	101081296	transcript	XM_019830296.2	protein_coding	5	c.90T>G	p.His30Gln
chrB2	23508750	A	C	PASS	missense_variant	MODERATE	FARS2	101081296	transcript	XM_011282158.3	protein_coding	5	c.90T>G	p.His30Gln
chrB2	23508750	A	C	PASS	missense_variant	MODERATE	FARS2	101081296	transcript	XM_019830292.2	protein_coding	5	c.90T>G	p.His30Gln
chrB2	23508750	A	C	PASS	missense_variant	MODERATE	FARS2	101081296	transcript	XM_019830297.2	protein_coding	5	c.90T>G	p.His30Gln
chrB2	23508750	A	C	PASS	missense_variant	MODERATE	FARS2	101081296	transcript	XM_019830282.2	protein_coding	4	c.90T>G	p.His30Gln
chrB2	23508750	A	C	PASS	missense_variant	MODERATE	FARS2	101081296	transcript	XM_019830283.2	protein_coding	5	c.90T>G	p.His30Gln
chrB2	23508750	A	C	PASS	missense_variant	MODERATE	FARS2	101081296	transcript	XM_019830284.2	protein_coding	6	c.90T>G	p.His30Gln
chrB2	23508750	A	C	PASS	missense_variant	MODERATE	FARS2	101081296	transcript	XM_019830287.2	protein_coding	5	c.90T>G	p.His30Gln
chrB2	23508750	A	C	PASS	missense_variant	MODERATE	FARS2	101081296	transcript	XM_019830288.2	protein_coding	4	c.90T>G	p.His30Gln
chrB2	23508750	A	C	PASS	missense_variant	MODERATE	FARS2	101081296	transcript	XM_019830290.2	protein_coding	3	c.90T>G	p.His30Gln
chrB2	23508750	A	C	PASS	missense_variant	MODERATE	FARS2	101081296	transcript	XM_019830291.2	protein_coding	5	c.90T>G	p.His30Gln
chrB2	23508750	A	C	PASS	missense_variant	MODERATE	FARS2	101081296	transcript	XM_019830286.2	protein_coding	5	c.90T>G	p.His30Gln
chrB2	23508750	A	C	PASS	missense_variant	MODERATE	FARS2	101081296	transcript	XM_019830285.1	protein_coding	5	c.90T>G	p.His30Gln
chrB2	23508750	A	C	PASS	missense_variant	MODERATE	FARS2	101081296	transcript	XM_019830294.2	protein_coding	5	c.90T>G	p.His30Gln
chrB2	23508750	A	C	PASS	missense_variant	MODERATE	FARS2	101081296	transcript	XM_023253710.1	protein_coding	5	c.90T>G	p.His30Gln
chrB2	23508750	A	C	PASS	missense_variant	MODERATE	FARS2	101081296	transcript	XM_023253711.1	protein_coding	5	c.90T>G	p.His30Gln
chrB2	23508806	T	C	PASS	missense_variant	MODERATE	FARS2	101081296	transcript	XM_019830281.2	protein_coding	5	c.34A>G	p.Met12Val
chrB2	23508806	T	C	PASS	missense_variant	MODERATE	FARS2	101081296	transcript	XM_019830295.2	protein_coding	5	c.34A>G	p.Met12Val
chrB2	23508806	T	C	PASS	missense_variant	MODERATE	FARS2	101081296	transcript	XM_019830299.2	protein_coding	5	c.34A>G	p.Met12Val
chrB2	23508806	T	C	PASS	missense_variant	MODERATE	FARS2	101081296	transcript	XM_019830296.2	protein_coding	5	c.34A>G	p.Met12Val
chrB2	23508806	T	C	PASS	missense_variant	MODERATE	FARS2	101081296	transcript	XM_011282158.3	protein_coding	5	c.34A>G	p.Met12Val
chrB2	23508806	T	C	PASS	missense_variant	MODERATE	FARS2	101081296	transcript	XM_019830292.2	protein_coding	5	c.34A>G	p.Met12Val
chrB2	23508806	T	C	PASS	missense_variant	MODERATE	FARS2	101081296	transcript	XM_019830297.2	protein_coding	5	c.34A>G	p.Met12Val
chrB2	23508806	T	C	PASS	missense_variant	MODERATE	FARS2	101081296	transcript	XM_019830282.2	protein_coding	4	c.34A>G	p.Met12Val
chrB2	23508806	T	C	PASS	missense_variant	MODERATE	FARS2	101081296	transcript	XM_019830283.2	protein_coding	5	c.34A>G	p.Met12Val
chrB2	23508806	T	C	PASS	missense_variant	MODERATE	FARS2	101081296	transcript	XM_019830284.2	protein_coding	6	c.34A>G	p.Met12Val
chrB2	23508806	T	C	PASS	missense_variant	MODERATE	FARS2	101081296	transcript	XM_019830287.2	protein_coding	5	c.34A>G	p.Met12Val
chrB2	23508806	T	C	PASS	missense_variant	MODERATE	FARS2	101081296	transcript	XM_019830288.2	protein_coding	4	c.34A>G	p.Met12Val
chrB2	23508806	T	C	PASS	missense_variant	MODERATE	FARS2	101081296	transcript	XM_019830290.2	protein_coding	3	c.34A>G	p.Met12Val
chrB2	23508806	T	C	PASS	missense_variant	MODERATE	FARS2	101081296	transcript	XM_019830291.2	protein_coding	5	c.34A>G	p.Met12Val
chrB2	23508806	T	C	PASS	missense_variant	MODERATE	FARS2	101081296	transcript	XM_019830286.2	protein_coding	5	c.34A>G	p.Met12Val
chrB2	23508806	T	C	PASS	missense_variant	MODERATE	FARS2	101081296	transcript	XM_019830285.1	protein_coding	5	c.34A>G	p.Met12Val
chrB2	23508806	T	C	PASS	missense_variant	MODERATE	FARS2	101081296	transcript	XM_019830294.2	protein_coding	5	c.34A>G	p.Met12Val
chrB2	23508806	T	C	PASS	missense_variant	MODERATE	FARS2	101081296	transcript	XM_023253710.1	protein_coding	5	c.34A>G	p.Met12Val
chrB2	23508806	T	C	PASS	missense_variant	MODERATE	FARS2	101081296	transcript	XM_023253711.1	protein_coding	5	c.34A>G	p.Met12Val
chrB2	23762745	G	A	PASS	missense_variant	MODERATE	LYRM4	101081544	transcript	XM_006931479.3	protein_coding	3	c.274G>A	p.Ala92Thr
chrB2	23762745	G	A	PASS	missense_variant	MODERATE	LYRM4	101081544	transcript	XM_019830300.1	protein_coding	4	c.223G>A	p.Ala75Thr
chrB2	23851103	G	T	PASS	missense_variant	MODERATE	PPP1R3G	105260562	transcript	XM_023253712.1	protein_coding	1	c.553C>A	p.Pro185Thr
chrB2	23851133	C	T	PASS	missense_variant	MODERATE	PPP1R3G	105260562	transcript	XM_023253712.1	protein_coding	1	c.523G>A	p.Ala175Thr
chrB2	23851361	G	C	PASS	missense_variant	MODERATE	PPP1R3G	105260562	transcript	XM_023253712.1	protein_coding	1	c.295C>G	p.Gln99Glu
chrB2	23851498	A	G	PASS	missense_variant	MODERATE	PPP1R3G	105260562	transcript	XM_023253712.1	protein_coding	1	c.158T>C	p.Val53Ala
chrB2	23942736	T	G	PASS	missense_variant	MODERATE	RPP40	101082058	transcript	XM_003985838.4	protein_coding	6	c.592T>G	p.Ser198Ala
chrB2	24197416	C	G	PASS	missense_variant	MODERATE	CDYL	101082311	transcript	XM_019830302.2	protein_coding	3	c.60G>C	p.Glu20Asp
chrB2	24197416	C	G	PASS	missense_variant	MODERATE	CDYL	101082311	transcript	XM_019830306.2	protein_coding	3	c.60G>C	p.Glu20Asp
chrB2	24197416	C	G	PASS	missense_variant	MODERATE	CDYL	101082311	transcript	XM_023253713.1	protein_coding	3	c.60G>C	p.Glu20Asp
chrB2	24733418	A	C	PASS	missense_variant	MODERATE	ECI2	101083589	transcript	XM_003985843.4	protein_coding	4	c.431A>C	p.Tyr144Ser
chrB2	24733418	A	C	PASS	missense_variant	MODERATE	ECI2	101083589	transcript	XM_019830318.2	protein_coding	5	c.329A>C	p.Tyr110Ser
chrB2	24740576	A	T	PASS	missense_variant	MODERATE	ECI2	101083589	transcript	XM_003985843.4	protein_coding	6	c.601A>T	p.Thr201Ser
chrB2	24740576	A	T	PASS	missense_variant	MODERATE	ECI2	101083589	transcript	XM_019830318.2	protein_coding	7	c.499A>T	p.Thr167Ser
chrB2	24746656	A	T	PASS	missense_variant	MODERATE	ECI2	101083589	transcript	XM_003985843.4	protein_coding	9	c.910A>T	p.Ile304Leu
chrB2	24746656	A	T	PASS	missense_variant	MODERATE	ECI2	101083589	transcript	XM_019830318.2	protein_coding	10	c.808A>T	p.Ile270Leu
chrB2	24747695	A	G	PASS	missense_variant	MODERATE	ECI2	101083589	transcript	XM_003985843.4	protein_coding	10	c.1076A>G	p.His359Arg
chrB2	24747695	A	G	PASS	missense_variant	MODERATE	ECI2	101083589	transcript	XM_019830318.2	protein_coding	11	c.974A>G	p.His325Arg
chrB2	24805054	A	T	PASS	missense_variant	MODERATE	PRPF4B	101082567	transcript	XM_019830307.1	protein_coding	3	c.1414T>A	p.Ser472Thr
chrB2	24805054	A	T	PASS	missense_variant	MODERATE	PRPF4B	101082567	transcript	XM_019830308.1	protein_coding	3	c.1414T>A	p.Ser472Thr
chrB2	24805054	A	T	PASS	missense_variant	MODERATE	PRPF4B	101082567	transcript	XM_019830309.1	protein_coding	3	c.1414T>A	p.Ser472Thr
chrB2	24805054	A	T	PASS	missense_variant	MODERATE	PRPF4B	101082567	transcript	XM_019830310.1	protein_coding	3	c.1414T>A	p.Ser472Thr
chrB2	24805054	A	T	PASS	missense_variant	MODERATE	PRPF4B	101082567	transcript	XM_019830311.1	protein_coding	3	c.1414T>A	p.Ser472Thr
chrB2	24805054	A	T	PASS	missense_variant	MODERATE	PRPF4B	101082567	transcript	XM_019830312.1	protein_coding	3	c.1414T>A	p.Ser472Thr
chrB2	24805054	A	T	PASS	missense_variant	MODERATE	PRPF4B	101082567	transcript	XM_019830313.1	protein_coding	3	c.1414T>A	p.Ser472Thr
chrB2	24805054	A	T	PASS	missense_variant	MODERATE	PRPF4B	101082567	transcript	XM_019830314.1	protein_coding	3	c.1414T>A	p.Ser472Thr
chrB2	24805054	A	T	PASS	missense_variant	MODERATE	PRPF4B	101082567	transcript	XM_019830315.1	protein_coding	3	c.1414T>A	p.Ser472Thr
chrB2	24805054	A	T	PASS	missense_variant	MODERATE	PRPF4B	101082567	transcript	XM_019830316.1	protein_coding	3	c.1414T>A	p.Ser472Thr
chrB2	24805054	A	T	PASS	missense_variant	MODERATE	PRPF4B	101082567	transcript	XM_006931480.4	protein_coding	3	c.1414T>A	p.Ser472Thr
chrB2	25482609	G	C	PASS	missense_variant	MODERATE	SLC22A23	101084625	transcript	XM_023253717.1	protein_coding	1	c.182G>C	p.Gly61Ala
chrB2	25482609	G	C	PASS	missense_variant	MODERATE	SLC22A23	101084625	transcript	XM_023253718.1	protein_coding	1	c.182G>C	p.Gly61Ala
chrB2	25482870	G	A	PASS	missense_variant	MODERATE	SLC22A23	101084625	transcript	XM_023253717.1	protein_coding	1	c.443G>A	p.Arg148Gln
chrB2	25482870	G	A	PASS	missense_variant	MODERATE	SLC22A23	101084625	transcript	XM_023253718.1	protein_coding	1	c.443G>A	p.Arg148Gln
chrB2	25670573	G	A	PASS	missense_variant	MODERATE	PSMG4	101086905	transcript	XM_023253719.1	protein_coding	2	c.203C>T	p.Ser68Leu
chrB2	25732842	C	A	PASS	splice_acceptor_variant&intron_variant	HIGH	LOC101087156	101087156	transcript	101087156	pseudogene	1	n.136-1G>T
chrB2	31899709	AG	A	PASS	frameshift_variant	HIGH	POU5F1	100174788	transcript	NM_001173441.1	protein_coding	5	c.987delC	p.Phe330fs
chrB2	31899716	G	GGTAC	PASS	frameshift_variant	HIGH	POU5F1	100174788	transcript	NM_001173441.1	protein_coding	5	c.980_981insGTAC	p.Ser327fs
chrB2	40751258	T	C	PASS	missense_variant	MODERATE	KIF6	101096233	transcript	XM_006931669.4	protein_coding	10	c.1106A>G	p.Gln369Arg
chrB2	40751258	T	C	PASS	missense_variant	MODERATE	KIF6	101096233	transcript	XM_019830555.2	protein_coding	8	c.881A>G	p.Gln294Arg
chrB2	40751258	T	C	PASS	missense_variant	MODERATE	KIF6	101096233	transcript	XM_019830554.2	protein_coding	9	c.1031A>G	p.Gln344Arg
chrB2	40807600	C	T	PASS	missense_variant	MODERATE	KIF6	101096233	transcript	XM_006931669.4	protein_coding	5	c.425G>A	p.Arg142His
chrB2	40807600	C	T	PASS	missense_variant	MODERATE	KIF6	101096233	transcript	XM_019830555.2	protein_coding	3	c.200G>A	p.Arg67His
chrB2	40807600	C	T	PASS	missense_variant	MODERATE	KIF6	101096233	transcript	XM_019830554.2	protein_coding	4	c.350G>A	p.Arg117His
chrB2	41050314	A	G	PASS	missense_variant	MODERATE	DAAM2	101086145	transcript	XM_019830558.2	protein_coding	15	c.1613A>G	p.Asn538Ser
chrB2	41050314	A	G	PASS	missense_variant	MODERATE	DAAM2	101086145	transcript	XM_006931672.4	protein_coding	15	c.1613A>G	p.Asn538Ser
chrB2	41050314	A	G	PASS	missense_variant	MODERATE	DAAM2	101086145	transcript	XM_019830560.2	protein_coding	14	c.1613A>G	p.Asn538Ser
chrB2	41050314	A	G	PASS	missense_variant	MODERATE	DAAM2	101086145	transcript	XM_019830559.2	protein_coding	15	c.1613A>G	p.Asn538Ser
chrB2	41050314	A	G	PASS	missense_variant	MODERATE	DAAM2	101086145	transcript	XM_019830561.2	protein_coding	14	c.1613A>G	p.Asn538Ser
chrB2	41050314	A	G	PASS	missense_variant	MODERATE	DAAM2	101086145	transcript	XM_019830562.2	protein_coding	14	c.1613A>G	p.Asn538Ser
chrB2	41081336	G	A	PASS	missense_variant	MODERATE	MOCS1	101086723	transcript	XM_011282235.3	protein_coding	11	c.1216C>T	p.Arg406Cys
chrB2	41081336	G	A	PASS	missense_variant	MODERATE	MOCS1	101086723	transcript	XM_011282236.3	protein_coding	10	c.1168C>T	p.Arg390Cys
chrB2	41081336	G	A	PASS	missense_variant	MODERATE	MOCS1	101086723	transcript	XM_023253940.1	protein_coding	12	c.955C>T	p.Arg319Cys
chrB2	42086019	T	C	PASS	missense_variant	MODERATE	UNC5CL	101097396	transcript	XM_003986122.5	protein_coding	6	c.1184A>G	p.Asn395Ser
chrB2	42087262	G	A	PASS	missense_variant	MODERATE	UNC5CL	101097396	transcript	XM_003986122.5	protein_coding	4	c.820C>T	p.Arg274Trp
chrB2	42163518	C	T	PASS	missense_variant	MODERATE	LOC101090105	101090105	transcript	XM_023253941.1	protein_coding	1	c.28C>T	p.Pro10Ser
chrB2	42180039	C	A	PASS	missense_variant	MODERATE	LOC101090105	101090105	transcript	XM_006931757.4	protein_coding	6	c.689C>A	p.Ala230Asp
chrB2	42180039	C	A	PASS	missense_variant	MODERATE	LOC101090105	101090105	transcript	XM_023253946.1	protein_coding	6	c.689C>A	p.Ala230Asp
chrB2	42180039	C	A	PASS	missense_variant	MODERATE	LOC101090105	101090105	transcript	XM_023253947.1	protein_coding	6	c.689C>A	p.Ala230Asp
chrB2	42180039	C	A	PASS	missense_variant	MODERATE	LOC101090105	101090105	transcript	XM_023253944.1	protein_coding	6	c.689C>A	p.Ala230Asp
chrB2	42180039	C	A	PASS	missense_variant	MODERATE	LOC101090105	101090105	transcript	XM_023253948.1	protein_coding	6	c.689C>A	p.Ala230Asp
chrB2	42180039	C	A	PASS	missense_variant	MODERATE	LOC101090105	101090105	transcript	XM_023253943.1	protein_coding	6	c.689C>A	p.Ala230Asp
chrB2	42180039	C	A	PASS	missense_variant	MODERATE	LOC101090105	101090105	transcript	XM_023253942.1	protein_coding	5	c.545C>A	p.Ala182Asp
chrB2	42180039	C	A	PASS	missense_variant	MODERATE	LOC101090105	101090105	transcript	XM_023253941.1	protein_coding	6	c.563C>A	p.Ala188Asp
chrB2	42187035	C	A	PASS	missense_variant	MODERATE	LOC101090105	101090105	transcript	XM_006931757.4	protein_coding	12	c.1447C>A	p.His483Asn
chrB2	42187035	C	A	PASS	missense_variant	MODERATE	LOC101090105	101090105	transcript	XM_023253946.1	protein_coding	12	c.1447C>A	p.His483Asn
chrB2	42187035	C	A	PASS	missense_variant	MODERATE	LOC101090105	101090105	transcript	XM_023253947.1	protein_coding	12	c.1447C>A	p.His483Asn
chrB2	42187035	C	A	PASS	missense_variant	MODERATE	LOC101090105	101090105	transcript	XM_023253944.1	protein_coding	12	c.1447C>A	p.His483Asn
chrB2	42187035	C	A	PASS	missense_variant	MODERATE	LOC101090105	101090105	transcript	XM_023253948.1	protein_coding	12	c.1447C>A	p.His483Asn
chrB2	42187035	C	A	PASS	missense_variant	MODERATE	LOC101090105	101090105	transcript	XM_023253943.1	protein_coding	12	c.1447C>A	p.His483Asn
chrB2	42187035	C	A	PASS	missense_variant	MODERATE	LOC101090105	101090105	transcript	XM_023253942.1	protein_coding	11	c.1303C>A	p.His435Asn
chrB2	42187035	C	A	PASS	missense_variant	MODERATE	LOC101090105	101090105	transcript	XM_023253941.1	protein_coding	12	c.1321C>A	p.His441Asn
chrB2	42187035	C	A	PASS	missense_variant	MODERATE	LOC101090105	101090105	transcript	XM_023253945.1	protein_coding	7	c.637C>A	p.His213Asn
chrB2	42188126	A	T	PASS	missense_variant	MODERATE	LOC101090105	101090105	transcript	XM_006931757.4	protein_coding	14	c.1633A>T	p.Met545Leu
chrB2	42188126	A	T	PASS	missense_variant	MODERATE	LOC101090105	101090105	transcript	XM_023253946.1	protein_coding	14	c.1633A>T	p.Met545Leu
chrB2	42188126	A	T	PASS	missense_variant	MODERATE	LOC101090105	101090105	transcript	XM_023253947.1	protein_coding	14	c.1633A>T	p.Met545Leu
chrB2	42188126	A	T	PASS	missense_variant	MODERATE	LOC101090105	101090105	transcript	XM_023253944.1	protein_coding	14	c.1633A>T	p.Met545Leu
chrB2	42188126	A	T	PASS	missense_variant	MODERATE	LOC101090105	101090105	transcript	XM_023253948.1	protein_coding	14	c.1633A>T	p.Met545Leu
chrB2	42188126	A	T	PASS	missense_variant	MODERATE	LOC101090105	101090105	transcript	XM_023253943.1	protein_coding	14	c.1633A>T	p.Met545Leu
chrB2	42188126	A	T	PASS	missense_variant	MODERATE	LOC101090105	101090105	transcript	XM_023253942.1	protein_coding	13	c.1489A>T	p.Met497Leu
chrB2	42188126	A	T	PASS	missense_variant	MODERATE	LOC101090105	101090105	transcript	XM_023253941.1	protein_coding	14	c.1507A>T	p.Met503Leu
chrB2	42188126	A	T	PASS	missense_variant	MODERATE	LOC101090105	101090105	transcript	XM_023253945.1	protein_coding	9	c.823A>T	p.Met275Leu
chrB2	42189488	C	A	PASS	missense_variant	MODERATE	LOC101090105	101090105	transcript	XM_006931757.4	protein_coding	15	c.1821C>A	p.Phe607Leu
chrB2	42189488	C	A	PASS	missense_variant	MODERATE	LOC101090105	101090105	transcript	XM_023253946.1	protein_coding	15	c.1821C>A	p.Phe607Leu
chrB2	42189488	C	A	PASS	missense_variant	MODERATE	LOC101090105	101090105	transcript	XM_023253947.1	protein_coding	15	c.1821C>A	p.Phe607Leu
chrB2	42189488	C	A	PASS	missense_variant	MODERATE	LOC101090105	101090105	transcript	XM_023253944.1	protein_coding	15	c.1821C>A	p.Phe607Leu
chrB2	42189488	C	A	PASS	missense_variant	MODERATE	LOC101090105	101090105	transcript	XM_023253948.1	protein_coding	15	c.1821C>A	p.Phe607Leu
chrB2	42189488	C	A	PASS	missense_variant	MODERATE	LOC101090105	101090105	transcript	XM_023253943.1	protein_coding	15	c.1821C>A	p.Phe607Leu
chrB2	42189488	C	A	PASS	missense_variant	MODERATE	LOC101090105	101090105	transcript	XM_023253942.1	protein_coding	14	c.1677C>A	p.Phe559Leu
chrB2	42189488	C	A	PASS	missense_variant	MODERATE	LOC101090105	101090105	transcript	XM_023253941.1	protein_coding	15	c.1695C>A	p.Phe565Leu
chrB2	42189488	C	A	PASS	missense_variant	MODERATE	LOC101090105	101090105	transcript	XM_023253945.1	protein_coding	10	c.1011C>A	p.Phe337Leu
chrB2	42192309	G	A	PASS	missense_variant	MODERATE	LOC101090105	101090105	transcript	XM_006931757.4	protein_coding	18	c.2314G>A	p.Val772Met
chrB2	42192309	G	A	PASS	missense_variant	MODERATE	LOC101090105	101090105	transcript	XM_023253946.1	protein_coding	18	c.2314G>A	p.Val772Met
chrB2	42192309	G	A	PASS	missense_variant	MODERATE	LOC101090105	101090105	transcript	XM_023253947.1	protein_coding	18	c.2314G>A	p.Val772Met
chrB2	42192309	G	A	PASS	missense_variant	MODERATE	LOC101090105	101090105	transcript	XM_023253944.1	protein_coding	18	c.2314G>A	p.Val772Met
chrB2	42192309	G	A	PASS	missense_variant	MODERATE	LOC101090105	101090105	transcript	XM_023253948.1	protein_coding	18	c.2314G>A	p.Val772Met
chrB2	42192309	G	A	PASS	missense_variant	MODERATE	LOC101090105	101090105	transcript	XM_023253943.1	protein_coding	18	c.2314G>A	p.Val772Met
chrB2	42192309	G	A	PASS	missense_variant	MODERATE	LOC101090105	101090105	transcript	XM_023253942.1	protein_coding	17	c.2170G>A	p.Val724Met
chrB2	42192309	G	A	PASS	missense_variant	MODERATE	LOC101090105	101090105	transcript	XM_023253941.1	protein_coding	18	c.2188G>A	p.Val730Met
chrB2	42192309	G	A	PASS	missense_variant	MODERATE	LOC101090105	101090105	transcript	XM_023253945.1	protein_coding	13	c.1504G>A	p.Val502Met
chrB2	42194888	A	T	PASS	missense_variant	MODERATE	LOC101090105	101090105	transcript	XM_006931757.4	protein_coding	19	c.2656A>T	p.Thr886Ser
chrB2	42194888	A	T	PASS	missense_variant	MODERATE	LOC101090105	101090105	transcript	XM_023253946.1	protein_coding	19	c.2656A>T	p.Thr886Ser
chrB2	42194888	A	T	PASS	missense_variant	MODERATE	LOC101090105	101090105	transcript	XM_023253947.1	protein_coding	19	c.2656A>T	p.Thr886Ser
chrB2	42194888	A	T	PASS	missense_variant	MODERATE	LOC101090105	101090105	transcript	XM_023253944.1	protein_coding	19	c.2656A>T	p.Thr886Ser
chrB2	42194888	A	T	PASS	missense_variant	MODERATE	LOC101090105	101090105	transcript	XM_023253948.1	protein_coding	19	c.2656A>T	p.Thr886Ser
chrB2	42194888	A	T	PASS	missense_variant	MODERATE	LOC101090105	101090105	transcript	XM_023253943.1	protein_coding	19	c.2656A>T	p.Thr886Ser
chrB2	42194888	A	T	PASS	missense_variant	MODERATE	LOC101090105	101090105	transcript	XM_023253942.1	protein_coding	18	c.2512A>T	p.Thr838Ser
chrB2	42194888	A	T	PASS	missense_variant	MODERATE	LOC101090105	101090105	transcript	XM_023253941.1	protein_coding	19	c.2530A>T	p.Thr844Ser
chrB2	42194888	A	T	PASS	missense_variant	MODERATE	LOC101090105	101090105	transcript	XM_023253945.1	protein_coding	14	c.1846A>T	p.Thr616Ser
chrB2	42201214	A	G	PASS	missense_variant	MODERATE	LOC101090105	101090105	transcript	XM_006931757.4	protein_coding	21	c.3071A>G	p.Asn1024Ser
chrB2	42201214	A	G	PASS	missense_variant	MODERATE	LOC101090105	101090105	transcript	XM_023253946.1	protein_coding	21	c.3071A>G	p.Asn1024Ser
chrB2	42201214	A	G	PASS	missense_variant	MODERATE	LOC101090105	101090105	transcript	XM_023253947.1	protein_coding	21	c.3071A>G	p.Asn1024Ser
chrB2	42201214	A	G	PASS	missense_variant	MODERATE	LOC101090105	101090105	transcript	XM_023253944.1	protein_coding	21	c.3071A>G	p.Asn1024Ser
chrB2	42201214	A	G	PASS	missense_variant	MODERATE	LOC101090105	101090105	transcript	XM_023253948.1	protein_coding	21	c.3071A>G	p.Asn1024Ser
chrB2	42201214	A	G	PASS	missense_variant	MODERATE	LOC101090105	101090105	transcript	XM_023253943.1	protein_coding	21	c.3071A>G	p.Asn1024Ser
chrB2	42201214	A	G	PASS	missense_variant	MODERATE	LOC101090105	101090105	transcript	XM_023253942.1	protein_coding	20	c.2927A>G	p.Asn976Ser
chrB2	42201214	A	G	PASS	missense_variant	MODERATE	LOC101090105	101090105	transcript	XM_023253941.1	protein_coding	21	c.2945A>G	p.Asn982Ser
chrB2	42201214	A	G	PASS	missense_variant	MODERATE	LOC101090105	101090105	transcript	XM_023253945.1	protein_coding	16	c.2261A>G	p.Asn754Ser
chrB2	42206572	G	A	PASS	missense_variant	MODERATE	LOC101090105	101090105	transcript	XM_006931757.4	protein_coding	24	c.3593G>A	p.Ser1198Asn
chrB2	42206572	G	A	PASS	missense_variant	MODERATE	LOC101090105	101090105	transcript	XM_023253946.1	protein_coding	24	c.3593G>A	p.Ser1198Asn
chrB2	42206572	G	A	PASS	missense_variant	MODERATE	LOC101090105	101090105	transcript	XM_023253947.1	protein_coding	24	c.3593G>A	p.Ser1198Asn
chrB2	42206572	G	A	PASS	missense_variant	MODERATE	LOC101090105	101090105	transcript	XM_023253944.1	protein_coding	24	c.3593G>A	p.Ser1198Asn
chrB2	42206572	G	A	PASS	missense_variant	MODERATE	LOC101090105	101090105	transcript	XM_023253948.1	protein_coding	24	c.3593G>A	p.Ser1198Asn
chrB2	42206572	G	A	PASS	missense_variant	MODERATE	LOC101090105	101090105	transcript	XM_023253943.1	protein_coding	24	c.3593G>A	p.Ser1198Asn
chrB2	42206572	G	A	PASS	missense_variant	MODERATE	LOC101090105	101090105	transcript	XM_023253942.1	protein_coding	23	c.3449G>A	p.Ser1150Asn
chrB2	42206572	G	A	PASS	missense_variant	MODERATE	LOC101090105	101090105	transcript	XM_023253941.1	protein_coding	24	c.3467G>A	p.Ser1156Asn
chrB2	42206572	G	A	PASS	missense_variant	MODERATE	LOC101090105	101090105	transcript	XM_023253945.1	protein_coding	19	c.2783G>A	p.Ser928Asn
chrB2	42209806	A	G	PASS	missense_variant	MODERATE	LOC101090105	101090105	transcript	XM_006931757.4	protein_coding	26	c.3959A>G	p.His1320Arg
chrB2	42209806	A	G	PASS	missense_variant	MODERATE	LOC101090105	101090105	transcript	XM_023253944.1	protein_coding	26	c.3959A>G	p.His1320Arg
chrB2	42209806	A	G	PASS	missense_variant	MODERATE	LOC101090105	101090105	transcript	XM_023253943.1	protein_coding	26	c.3959A>G	p.His1320Arg
chrB2	42209806	A	G	PASS	missense_variant	MODERATE	LOC101090105	101090105	transcript	XM_023253942.1	protein_coding	25	c.3815A>G	p.His1272Arg
chrB2	42209806	A	G	PASS	missense_variant	MODERATE	LOC101090105	101090105	transcript	XM_023253941.1	protein_coding	26	c.3833A>G	p.His1278Arg
chrB2	42209806	A	G	PASS	missense_variant	MODERATE	LOC101090105	101090105	transcript	XM_023253945.1	protein_coding	21	c.3149A>G	p.His1050Arg
chrB2	42209931	A	G	PASS	missense_variant	MODERATE	LOC101090105	101090105	transcript	XM_006931757.4	protein_coding	27	c.3995A>G	p.His1332Arg
chrB2	42209931	A	G	PASS	missense_variant	MODERATE	LOC101090105	101090105	transcript	XM_023253946.1	protein_coding	26	c.3790A>G	p.Met1264Val
chrB2	42209931	A	G	PASS	missense_variant	MODERATE	LOC101090105	101090105	transcript	XM_023253947.1	protein_coding	26	c.3790A>G	p.Met1264Val
chrB2	42209931	A	G	PASS	missense_variant	MODERATE	LOC101090105	101090105	transcript	XM_023253944.1	protein_coding	27	c.3995A>G	p.His1332Arg
chrB2	42209931	A	G	PASS	missense_variant	MODERATE	LOC101090105	101090105	transcript	XM_023253943.1	protein_coding	27	c.3995A>G	p.His1332Arg
chrB2	42209931	A	G	PASS	missense_variant	MODERATE	LOC101090105	101090105	transcript	XM_023253942.1	protein_coding	26	c.3851A>G	p.His1284Arg
chrB2	42209931	A	G	PASS	missense_variant	MODERATE	LOC101090105	101090105	transcript	XM_023253941.1	protein_coding	27	c.3869A>G	p.His1290Arg
chrB2	42209931	A	G	PASS	missense_variant	MODERATE	LOC101090105	101090105	transcript	XM_023253945.1	protein_coding	22	c.3185A>G	p.His1062Arg
chrB2	42212992	C	G	PASS	missense_variant	MODERATE	LOC101090105	101090105	transcript	XM_006931757.4	protein_coding	31	c.4616C>G	p.Ser1539Cys
chrB2	42212992	C	G	PASS	missense_variant	MODERATE	LOC101090105	101090105	transcript	XM_023253942.1	protein_coding	30	c.4472C>G	p.Ser1491Cys
chrB2	42212992	C	G	PASS	missense_variant	MODERATE	LOC101090105	101090105	transcript	XM_023253941.1	protein_coding	31	c.4490C>G	p.Ser1497Cys
chrB2	42212992	C	G	PASS	missense_variant	MODERATE	LOC101090105	101090105	transcript	XM_023253945.1	protein_coding	26	c.3806C>G	p.Ser1269Cys
chrB2	42213707	TG	T	PASS	frameshift_variant	HIGH	LOC101090105	101090105	transcript	XM_023253943.1	protein_coding	31	c.4608delG	p.Leu1536fs
chrB2	42222788	T	G	PASS	missense_variant	MODERATE	TREML1	101090357	transcript	XM_006931693.4	protein_coding	7	c.919A>C	p.Thr307Pro
chrB2	42222788	T	G	PASS	missense_variant	MODERATE	TREML1	101090357	transcript	XM_019830582.2	protein_coding	6	c.919A>C	p.Thr307Pro
chrB2	42222794	A	G	PASS	missense_variant	MODERATE	TREML1	101090357	transcript	XM_006931693.4	protein_coding	7	c.913T>C	p.Ser305Pro
chrB2	42222794	A	G	PASS	missense_variant	MODERATE	TREML1	101090357	transcript	XM_019830582.2	protein_coding	6	c.913T>C	p.Ser305Pro
chrB2	42222835	C	T	PASS	missense_variant	MODERATE	TREML1	101090357	transcript	XM_006931693.4	protein_coding	7	c.872G>A	p.Arg291Lys
chrB2	42222835	C	T	PASS	missense_variant	MODERATE	TREML1	101090357	transcript	XM_019830582.2	protein_coding	6	c.872G>A	p.Arg291Lys
chrB2	42227658	G	A	PASS	missense_variant	MODERATE	TREML1	101090357	transcript	XM_006931693.4	protein_coding	2	c.8C>T	p.Pro3Leu
chrB2	42227658	G	A	PASS	missense_variant	MODERATE	TREML1	101090357	transcript	XM_019830582.2	protein_coding	1	c.8C>T	p.Pro3Leu
chrB2	42232405	T	C	PASS	missense_variant	MODERATE	TREM2	101099297	transcript	XM_019830583.2	protein_coding	4	c.643A>G	p.Met215Val
chrB2	42232453	A	G	PASS	missense_variant	MODERATE	TREM2	101099297	transcript	XM_019830583.2	protein_coding	4	c.595T>C	p.Ser199Pro
chrB2	42232462	T	C	PASS	missense_variant	MODERATE	TREM2	101099297	transcript	XM_019830583.2	protein_coding	4	c.586A>G	p.Arg196Gly
chrB2	42232774	C	A	PASS	missense_variant	MODERATE	TREM2	101099297	transcript	XM_003986128.5	protein_coding	3	c.476G>T	p.Arg159Met
chrB2	42232774	C	A	PASS	missense_variant	MODERATE	TREM2	101099297	transcript	XM_019830583.2	protein_coding	3	c.476G>T	p.Arg159Met
chrB2	42248289	T	C	PASS	missense_variant	MODERATE	LOC101090615	101090615	transcript	XM_006931696.3	protein_coding	7	c.1234A>G	p.Asn412Asp
chrB2	42248289	T	C	PASS	missense_variant	MODERATE	LOC101090615	101090615	transcript	XM_006931697.3	protein_coding	7	c.1225A>G	p.Asn409Asp
chrB2	42248313	G	A	PASS	missense_variant	MODERATE	LOC101090615	101090615	transcript	XM_006931696.3	protein_coding	7	c.1210C>T	p.His404Tyr
chrB2	42248313	G	A	PASS	missense_variant	MODERATE	LOC101090615	101090615	transcript	XM_006931697.3	protein_coding	7	c.1201C>T	p.His401Tyr
chrB2	42249365	T	C	PASS	missense_variant	MODERATE	LOC101090615	101090615	transcript	XM_006931696.3	protein_coding	6	c.1030A>G	p.Ile344Val
chrB2	42249365	T	C	PASS	missense_variant	MODERATE	LOC101090615	101090615	transcript	XM_006931697.3	protein_coding	6	c.1030A>G	p.Ile344Val
chrB2	42249383	C	T	PASS	missense_variant	MODERATE	LOC101090615	101090615	transcript	XM_006931696.3	protein_coding	6	c.1012G>A	p.Val338Ile
chrB2	42249383	C	T	PASS	missense_variant	MODERATE	LOC101090615	101090615	transcript	XM_006931697.3	protein_coding	6	c.1012G>A	p.Val338Ile
chrB2	42251455	C	T	PASS	missense_variant	MODERATE	LOC101090615	101090615	transcript	XM_006931696.3	protein_coding	5	c.893G>A	p.Arg298His
chrB2	42251455	C	T	PASS	missense_variant	MODERATE	LOC101090615	101090615	transcript	XM_006931697.3	protein_coding	5	c.893G>A	p.Arg298His
chrB2	42252790	C	T	PASS	missense_variant	MODERATE	LOC101090615	101090615	transcript	XM_006931696.3	protein_coding	4	c.860G>A	p.Ser287Asn
chrB2	42252790	C	T	PASS	missense_variant	MODERATE	LOC101090615	101090615	transcript	XM_006931697.3	protein_coding	4	c.860G>A	p.Ser287Asn
chrB2	42252811	T	G	PASS	missense_variant	MODERATE	LOC101090615	101090615	transcript	XM_006931696.3	protein_coding	4	c.839A>C	p.Lys280Thr
chrB2	42252811	T	G	PASS	missense_variant	MODERATE	LOC101090615	101090615	transcript	XM_006931697.3	protein_coding	4	c.839A>C	p.Lys280Thr
chrB2	42254541	C	T	PASS	missense_variant	MODERATE	LOC101090615	101090615	transcript	XM_006931696.3	protein_coding	3	c.772G>A	p.Gly258Arg
chrB2	42254541	C	T	PASS	missense_variant	MODERATE	LOC101090615	101090615	transcript	XM_006931697.3	protein_coding	3	c.772G>A	p.Gly258Arg
chrB2	42254781	C	G	PASS	missense_variant	MODERATE	LOC101090615	101090615	transcript	XM_006931696.3	protein_coding	3	c.532G>C	p.Val178Leu
chrB2	42254781	C	G	PASS	missense_variant	MODERATE	LOC101090615	101090615	transcript	XM_006931697.3	protein_coding	3	c.532G>C	p.Val178Leu
chrB2	42254832	G	T	PASS	missense_variant	MODERATE	LOC101090615	101090615	transcript	XM_006931696.3	protein_coding	3	c.481C>A	p.Gln161Lys
chrB2	42254832	G	T	PASS	missense_variant	MODERATE	LOC101090615	101090615	transcript	XM_006931697.3	protein_coding	3	c.481C>A	p.Gln161Lys
chrB2	42255087	T	C	PASS	missense_variant	MODERATE	LOC101090615	101090615	transcript	XM_006931696.3	protein_coding	2	c.419A>G	p.Asp140Gly
chrB2	42255087	T	C	PASS	missense_variant	MODERATE	LOC101090615	101090615	transcript	XM_006931697.3	protein_coding	2	c.419A>G	p.Asp140Gly
chrB2	42255217	G	A	PASS	missense_variant	MODERATE	LOC101090615	101090615	transcript	XM_006931696.3	protein_coding	2	c.289C>T	p.Arg97Cys
chrB2	42255217	G	A	PASS	missense_variant	MODERATE	LOC101090615	101090615	transcript	XM_006931697.3	protein_coding	2	c.289C>T	p.Arg97Cys
chrB2	42255295	G	A	PASS	missense_variant	MODERATE	LOC101090615	101090615	transcript	XM_006931696.3	protein_coding	2	c.211C>T	p.Arg71Cys
chrB2	42255295	G	A	PASS	missense_variant	MODERATE	LOC101090615	101090615	transcript	XM_006931697.3	protein_coding	2	c.211C>T	p.Arg71Cys
chrB2	42255324	A	G	PASS	missense_variant	MODERATE	LOC101090615	101090615	transcript	XM_006931696.3	protein_coding	2	c.182T>C	p.Leu61Pro
chrB2	42255324	A	G	PASS	missense_variant	MODERATE	LOC101090615	101090615	transcript	XM_006931697.3	protein_coding	2	c.182T>C	p.Leu61Pro
chrB2	42255348	G	GCT	PASS	frameshift_variant	HIGH	LOC101090615	101090615	transcript	XM_006931696.3	protein_coding	2	c.156_157dupAG	p.Ala53fs
chrB2	42255348	G	GCT	PASS	frameshift_variant	HIGH	LOC101090615	101090615	transcript	XM_006931697.3	protein_coding	2	c.156_157dupAG	p.Ala53fs
chrB2	42260421	C	T	PASS	missense_variant	MODERATE	TREML2	102902253	transcript	XM_023253951.1	protein_coding	3	c.778G>A	p.Val260Ile
chrB2	42260421	C	T	PASS	missense_variant	MODERATE	TREML2	102902253	transcript	XM_023253952.1	protein_coding	3	c.778G>A	p.Val260Ile
chrB2	42260433	G	T	PASS	missense_variant	MODERATE	TREML2	102902253	transcript	XM_023253951.1	protein_coding	3	c.766C>A	p.Arg256Ser
chrB2	42260433	G	T	PASS	missense_variant	MODERATE	TREML2	102902253	transcript	XM_023253952.1	protein_coding	3	c.766C>A	p.Arg256Ser
chrB2	42293267	G	T	PASS	missense_variant	MODERATE	TREM1	101099551	transcript	XM_003986129.4	protein_coding	4	c.700C>A	p.Gln234Lys
chrB2	42297752	G	C	PASS	missense_variant	MODERATE	TREM1	101099551	transcript	XM_003986129.4	protein_coding	3	c.416C>G	p.Thr139Ser
chrB2	42299186	G	A	PASS	missense_variant	MODERATE	TREM1	101099551	transcript	XM_003986129.4	protein_coding	2	c.350C>T	p.Pro117Leu
chrB2	42356449	T	C	PASS	missense_variant	MODERATE	NCR2	101090864	transcript	XM_003986182.2	protein_coding	1	c.17T>C	p.Leu6Pro
chrB2	42356469	C	G	PASS	missense_variant	MODERATE	NCR2	101090864	transcript	XM_003986182.2	protein_coding	1	c.37C>G	p.Leu13Val
chrB2	42363108	G	A	PASS	missense_variant	MODERATE	NCR2	101090864	transcript	XM_003986182.2	protein_coding	3	c.481G>A	p.Ala161Thr
chrB2	42363126	G	A	PASS	missense_variant	MODERATE	NCR2	101090864	transcript	XM_003986182.2	protein_coding	3	c.499G>A	p.Ala167Thr
chrB2	42363303	A	G	PASS	missense_variant	MODERATE	NCR2	101090864	transcript	XM_003986182.2	protein_coding	4	c.569A>G	p.His190Arg
chrB2	42363332	C	G	PASS	missense_variant	MODERATE	NCR2	101090864	transcript	XM_003986182.2	protein_coding	4	c.598C>G	p.Leu200Val
chrB2	42363995	G	T	PASS	missense_variant	MODERATE	NCR2	101090864	transcript	XM_003986182.2	protein_coding	5	c.674G>T	p.Gly225Val
chrB2	42364021	T	C	PASS	missense_variant	MODERATE	NCR2	101090864	transcript	XM_003986182.2	protein_coding	5	c.700T>C	p.Ser234Pro
chrB2	42364024	A	G	PASS	missense_variant	MODERATE	NCR2	101090864	transcript	XM_003986182.2	protein_coding	5	c.703A>G	p.Arg235Gly
chrB2	42364034	C	A	PASS	missense_variant	MODERATE	NCR2	101090864	transcript	XM_003986182.2	protein_coding	5	c.713C>A	p.Ala238Asp
chrB2	42364069	G	A	PASS	missense_variant	MODERATE	NCR2	101090864	transcript	XM_003986182.2	protein_coding	5	c.748G>A	p.Gly250Ser
chrB2	42566225	G	A	PASS	missense_variant	MODERATE	FOXP4	101091110	transcript	XM_023253953.1	protein_coding	2	c.97G>A	p.Gly33Ser
chrB2	42566225	G	A	PASS	missense_variant	MODERATE	FOXP4	101091110	transcript	XM_023253954.1	protein_coding	2	c.97G>A	p.Gly33Ser
chrB2	42566225	G	A	PASS	missense_variant	MODERATE	FOXP4	101091110	transcript	XM_006931703.3	protein_coding	1	c.97G>A	p.Gly33Ser
chrB2	42566225	G	A	PASS	missense_variant	MODERATE	FOXP4	101091110	transcript	XM_006931705.4	protein_coding	1	c.97G>A	p.Gly33Ser
chrB2	42566225	G	A	PASS	missense_variant	MODERATE	FOXP4	101091110	transcript	XM_006931706.4	protein_coding	1	c.97G>A	p.Gly33Ser
chrB2	42566225	G	A	PASS	missense_variant	MODERATE	FOXP4	101091110	transcript	XM_023253955.1	protein_coding	1	c.97G>A	p.Gly33Ser
chrB2	42566225	G	A	PASS	missense_variant	MODERATE	FOXP4	101091110	transcript	XM_006931700.3	protein_coding	1	c.97G>A	p.Gly33Ser
chrB2	42566225	G	A	PASS	missense_variant	MODERATE	FOXP4	101091110	transcript	XM_006931702.3	protein_coding	1	c.97G>A	p.Gly33Ser
chrB2	42566273	G	A	PASS	missense_variant	MODERATE	FOXP4	101091110	transcript	XM_023253953.1	protein_coding	2	c.145G>A	p.Ala49Thr
chrB2	42566273	G	A	PASS	missense_variant	MODERATE	FOXP4	101091110	transcript	XM_023253954.1	protein_coding	2	c.145G>A	p.Ala49Thr
chrB2	42566273	G	A	PASS	missense_variant	MODERATE	FOXP4	101091110	transcript	XM_006931703.3	protein_coding	1	c.145G>A	p.Ala49Thr
chrB2	42566273	G	A	PASS	missense_variant	MODERATE	FOXP4	101091110	transcript	XM_006931705.4	protein_coding	1	c.145G>A	p.Ala49Thr
chrB2	42566273	G	A	PASS	missense_variant	MODERATE	FOXP4	101091110	transcript	XM_006931706.4	protein_coding	1	c.145G>A	p.Ala49Thr
chrB2	42566273	G	A	PASS	missense_variant	MODERATE	FOXP4	101091110	transcript	XM_023253955.1	protein_coding	1	c.145G>A	p.Ala49Thr
chrB2	42566273	G	A	PASS	missense_variant	MODERATE	FOXP4	101091110	transcript	XM_006931700.3	protein_coding	1	c.145G>A	p.Ala49Thr
chrB2	42566273	G	A	PASS	missense_variant	MODERATE	FOXP4	101091110	transcript	XM_006931702.3	protein_coding	1	c.145G>A	p.Ala49Thr
chrB2	43047479	G	A	PASS	missense_variant	MODERATE	CB2H6orf132	101092111	transcript	XM_023253972.1	protein_coding	4	c.1052C>T	p.Pro351Leu
chrB2	43047479	G	A	PASS	missense_variant	MODERATE	CB2H6orf132	101092111	transcript	XM_023253973.1	protein_coding	4	c.1052C>T	p.Pro351Leu
chrB2	46043592	ATCAGTGTATTACC	A	PASS	splice_donor_variant&splice_region_variant&5_prime_UTR_variant&intron_variant	HIGH	SUPT3H	101098540	transcript	XM_023254038.1	protein_coding	1	c.-1_-1+12delGGTAATACACTGA
chrB2	46198716	CACACAAATACTTA	C	PASS	splice_donor_variant&splice_region_variant&intron_variant	HIGH	LOC109499686	109499686	transcript	XR_002157106.2	pseudogene	1	n.259+2_259+14delTAAGTATTTGTGT
chrB2	47196679	T	C	PASS	missense_variant	MODERATE	LOC101100564	101100564	transcript	XM_003986216.5	protein_coding	7	c.844A>G	p.Thr282Ala
chrB2	47212945	G	T	PASS	missense_variant	MODERATE	LOC101100564	101100564	transcript	XM_003986216.5	protein_coding	3	c.386C>A	p.Thr129Asn
chrB2	47212966	G	A	PASS	missense_variant	MODERATE	LOC101100564	101100564	transcript	XM_003986216.5	protein_coding	3	c.365C>T	p.Thr122Met
chrB2	47230110	G	A	PASS	missense_variant	MODERATE	LOC101100564	101100564	transcript	XM_003986216.5	protein_coding	1	c.14C>T	p.Ser5Phe
chrB2	47230889	G	T	PASS	missense_variant	MODERATE	SLC25A27	101100134	transcript	XM_019830680.2	protein_coding	1	c.76G>T	p.Ala26Ser
chrB2	47232418	G	T	PASS	missense_variant	MODERATE	SLC25A27	101100134	transcript	XM_019830681.2	protein_coding	1	c.77G>T	p.Cys26Phe
chrB2	47252072	C	T	PASS	missense_variant	MODERATE	SLC25A27	101100134	transcript	XM_019830679.2	protein_coding	8	c.920C>T	p.Ser307Phe
chrB2	47252072	C	T	PASS	missense_variant	MODERATE	SLC25A27	101100134	transcript	XM_019830680.2	protein_coding	8	c.917C>T	p.Ser306Phe
chrB2	47252072	C	T	PASS	missense_variant	MODERATE	SLC25A27	101100134	transcript	XM_019830682.2	protein_coding	8	c.839C>T	p.Ser280Phe
chrB2	47252072	C	T	PASS	missense_variant	MODERATE	SLC25A27	101100134	transcript	XM_019830681.2	protein_coding	8	c.905C>T	p.Ser302Phe
chrB2	47252119	T	G	PASS	missense_variant	MODERATE	SLC25A27	101100134	transcript	XM_019830679.2	protein_coding	8	c.967T>G	p.Phe323Val
chrB2	47252119	T	G	PASS	missense_variant	MODERATE	SLC25A27	101100134	transcript	XM_019830680.2	protein_coding	8	c.964T>G	p.Phe322Val
chrB2	47252119	T	G	PASS	missense_variant	MODERATE	SLC25A27	101100134	transcript	XM_019830682.2	protein_coding	8	c.886T>G	p.Phe296Val
chrB2	47252119	T	G	PASS	missense_variant	MODERATE	SLC25A27	101100134	transcript	XM_019830681.2	protein_coding	8	c.952T>G	p.Phe318Val
chrB2	47267155	GCGA	G	PASS	disruptive_inframe_deletion	MODERATE	TDRD6	101090106	transcript	XM_023254042.1	protein_coding	1	c.419_421delACG	p.Asp140del
chrB2	47267188	A	C	PASS	missense_variant	MODERATE	TDRD6	101090106	transcript	XM_023254042.1	protein_coding	1	c.449A>C	p.His150Pro
chrB2	47267199	G	A	PASS	missense_variant	MODERATE	TDRD6	101090106	transcript	XM_023254042.1	protein_coding	1	c.460G>A	p.Gly154Ser
chrB2	47267398	G	A	PASS	missense_variant	MODERATE	TDRD6	101090106	transcript	XM_023254042.1	protein_coding	1	c.659G>A	p.Gly220Asp
chrB2	47268018	G	A	PASS	missense_variant	MODERATE	TDRD6	101090106	transcript	XM_023254042.1	protein_coding	1	c.1279G>A	p.Glu427Lys
chrB2	47268183	G	A	PASS	missense_variant	MODERATE	TDRD6	101090106	transcript	XM_023254042.1	protein_coding	1	c.1444G>A	p.Ala482Thr
chrB2	47268816	A	G	PASS	missense_variant	MODERATE	TDRD6	101090106	transcript	XM_023254042.1	protein_coding	1	c.2077A>G	p.Ile693Val
chrB2	47268820	C	T	PASS	missense_variant	MODERATE	TDRD6	101090106	transcript	XM_023254042.1	protein_coding	1	c.2081C>T	p.Pro694Leu
chrB2	47268822	G	A	PASS	missense_variant	MODERATE	TDRD6	101090106	transcript	XM_023254042.1	protein_coding	1	c.2083G>A	p.Val695Ile
chrB2	47268933	G	A	PASS	missense_variant	MODERATE	TDRD6	101090106	transcript	XM_023254042.1	protein_coding	1	c.2194G>A	p.Ala732Thr
chrB2	47269272	C	T	PASS	missense_variant	MODERATE	TDRD6	101090106	transcript	XM_023254042.1	protein_coding	2	c.2531C>T	p.Ala844Val
chrB2	47269508	A	G	PASS	missense_variant	MODERATE	TDRD6	101090106	transcript	XM_023254042.1	protein_coding	2	c.2767A>G	p.Lys923Glu
chrB2	47269965	C	A	PASS	missense_variant	MODERATE	TDRD6	101090106	transcript	XM_023254042.1	protein_coding	2	c.3224C>A	p.Pro1075Gln
chrB2	47270102	G	A	PASS	missense_variant	MODERATE	TDRD6	101090106	transcript	XM_023254042.1	protein_coding	2	c.3361G>A	p.Asp1121Asn
chrB2	47270285	C	A	PASS	missense_variant	MODERATE	TDRD6	101090106	transcript	XM_023254042.1	protein_coding	2	c.3544C>A	p.Gln1182Lys
chrB2	47270286	A	G	PASS	missense_variant	MODERATE	TDRD6	101090106	transcript	XM_023254042.1	protein_coding	2	c.3545A>G	p.Gln1182Arg
chrB2	47270601	T	C	PASS	missense_variant	MODERATE	TDRD6	101090106	transcript	XM_023254042.1	protein_coding	2	c.3860T>C	p.Val1287Ala
chrB2	47271102	A	G	PASS	missense_variant	MODERATE	TDRD6	101090106	transcript	XM_023254042.1	protein_coding	2	c.4361A>G	p.His1454Arg
chrB2	47271219	G	A	PASS	missense_variant	MODERATE	TDRD6	101090106	transcript	XM_023254042.1	protein_coding	2	c.4478G>A	p.Ser1493Asn
chrB2	47271321	T	G	PASS	missense_variant	MODERATE	TDRD6	101090106	transcript	XM_023254042.1	protein_coding	2	c.4580T>G	p.Leu1527Arg
chrB2	47271461	G	C	PASS	missense_variant	MODERATE	TDRD6	101090106	transcript	XM_023254042.1	protein_coding	2	c.4720G>C	p.Glu1574Gln
chrB2	47271492	C	T	PASS	missense_variant	MODERATE	TDRD6	101090106	transcript	XM_023254042.1	protein_coding	2	c.4751C>T	p.Pro1584Leu
chrB2	47272005	T	C	PASS	missense_variant	MODERATE	TDRD6	101090106	transcript	XM_023254042.1	protein_coding	2	c.5264T>C	p.Val1755Ala
chrB2	47272094	C	G	PASS	missense_variant	MODERATE	TDRD6	101090106	transcript	XM_023254042.1	protein_coding	2	c.5353C>G	p.Pro1785Ala
chrB2	47272242	T	C	PASS	missense_variant	MODERATE	TDRD6	101090106	transcript	XM_023254042.1	protein_coding	2	c.5501T>C	p.Met1834Thr
chrB2	47272499	G	C	PASS	missense_variant	MODERATE	TDRD6	101090106	transcript	XM_023254042.1	protein_coding	2	c.5758G>C	p.Glu1920Gln
chrB2	47272617	G	A	PASS	missense_variant	MODERATE	TDRD6	101090106	transcript	XM_023254042.1	protein_coding	2	c.5876G>A	p.Gly1959Asp
chrB2	47272637	G	A	PASS	missense_variant	MODERATE	TDRD6	101090106	transcript	XM_023254042.1	protein_coding	2	c.5896G>A	p.Val1966Met
chrB2	47272745	C	T	PASS	missense_variant	MODERATE	TDRD6	101090106	transcript	XM_023254042.1	protein_coding	2	c.6004C>T	p.His2002Tyr
chrB2	47272836	A	G	PASS	missense_variant	MODERATE	TDRD6	101090106	transcript	XM_023254042.1	protein_coding	2	c.6095A>G	p.His2032Arg
chrB2	47275228	G	A	PASS	missense_variant	MODERATE	TDRD6	101090106	transcript	XM_023254042.1	protein_coding	3	c.6208G>A	p.Val2070Ile
chrB2	47296453	T	G	PASS	missense_variant	MODERATE	PLA2G7	101100812	transcript	XM_023254043.1	protein_coding	8	c.717A>C	p.Glu239Asp
chrB2	47296453	T	G	PASS	missense_variant	MODERATE	PLA2G7	101100812	transcript	XM_023254044.1	protein_coding	8	c.717A>C	p.Glu239Asp
chrB2	47308057	G	C	PASS	missense_variant	MODERATE	PLA2G7	101100812	transcript	XM_023254043.1	protein_coding	2	c.39C>G	p.Cys13Trp
chrB2	47308057	G	C	PASS	missense_variant	MODERATE	PLA2G7	101100812	transcript	XM_023254044.1	protein_coding	2	c.39C>G	p.Cys13Trp
chrB2	47347691	C	A	PASS	missense_variant	MODERATE	ANKRD66	101090358	transcript	XM_023254045.1	protein_coding	2	c.195C>A	p.Asp65Glu
chrB2	47347692	A	T	PASS	missense_variant	MODERATE	ANKRD66	101090358	transcript	XM_023254045.1	protein_coding	2	c.196A>T	p.Asn66Tyr
chrB2	47352513	A	C	PASS	missense_variant	MODERATE	ANKRD66	101090358	transcript	XM_023254045.1	protein_coding	3	c.536A>C	p.Lys179Thr
chrB2	47384074	G	A	PASS	missense_variant	MODERATE	MEP1A	101101056	transcript	XM_003986218.5	protein_coding	2	c.85G>A	p.Glu29Lys
chrB2	47414883	T	G	PASS	missense_variant	MODERATE	MEP1A	101101056	transcript	XM_003986218.5	protein_coding	11	c.1439T>G	p.Ile480Ser
chrB2	47415052	G	T	PASS	missense_variant	MODERATE	MEP1A	101101056	transcript	XM_003986218.5	protein_coding	11	c.1608G>T	p.Gln536His
chrB2	47415796	A	C	PASS	missense_variant	MODERATE	MEP1A	101101056	transcript	XM_003986218.5	protein_coding	12	c.1628A>C	p.Asp543Ala
chrB2	47416565	C	A	PASS	missense_variant	MODERATE	MEP1A	101101056	transcript	XM_003986218.5	protein_coding	13	c.1882C>A	p.Pro628Thr
chrB2	47416629	A	G	PASS	missense_variant	MODERATE	MEP1A	101101056	transcript	XM_003986218.5	protein_coding	13	c.1946A>G	p.Glu649Gly
chrB2	47416742	T	A	PASS	missense_variant	MODERATE	MEP1A	101101056	transcript	XM_003986218.5	protein_coding	13	c.2059T>A	p.Phe687Ile
chrB2	47420141	A	G	PASS	missense_variant	MODERATE	MEP1A	101101056	transcript	XM_003986218.5	protein_coding	14	c.2191A>G	p.Ser731Gly
chrB2	47440838	T	C	PASS	missense_variant	MODERATE	ADGRF5	101101312	transcript	XM_006931786.4	protein_coding	18	c.3776A>G	p.Asn1259Ser
chrB2	47440838	T	C	PASS	missense_variant	MODERATE	ADGRF5	101101312	transcript	XM_003986219.5	protein_coding	17	c.3653A>G	p.Asn1218Ser
chrB2	47440838	T	C	PASS	missense_variant	MODERATE	ADGRF5	101101312	transcript	XM_006931788.4	protein_coding	18	c.3773A>G	p.Asn1258Ser
chrB2	47440838	T	C	PASS	missense_variant	MODERATE	ADGRF5	101101312	transcript	XM_006931790.4	protein_coding	17	c.3656A>G	p.Asn1219Ser
chrB2	47440838	T	C	PASS	missense_variant	MODERATE	ADGRF5	101101312	transcript	XM_023254046.1	protein_coding	18	c.3776A>G	p.Asn1259Ser
chrB2	47440838	T	C	PASS	missense_variant	MODERATE	ADGRF5	101101312	transcript	XM_006931787.4	protein_coding	18	c.3776A>G	p.Asn1259Ser
chrB2	47440838	T	C	PASS	missense_variant	MODERATE	ADGRF5	101101312	transcript	XM_019830688.2	protein_coding	18	c.3776A>G	p.Asn1259Ser
chrB2	47441021	A	G	PASS	missense_variant	MODERATE	ADGRF5	101101312	transcript	XM_006931786.4	protein_coding	18	c.3593T>C	p.Met1198Thr
chrB2	47441021	A	G	PASS	missense_variant	MODERATE	ADGRF5	101101312	transcript	XM_003986219.5	protein_coding	17	c.3470T>C	p.Met1157Thr
chrB2	47441021	A	G	PASS	missense_variant	MODERATE	ADGRF5	101101312	transcript	XM_006931788.4	protein_coding	18	c.3590T>C	p.Met1197Thr
chrB2	47441021	A	G	PASS	missense_variant	MODERATE	ADGRF5	101101312	transcript	XM_006931790.4	protein_coding	17	c.3473T>C	p.Met1158Thr
chrB2	47441021	A	G	PASS	missense_variant	MODERATE	ADGRF5	101101312	transcript	XM_023254046.1	protein_coding	18	c.3593T>C	p.Met1198Thr
chrB2	47441021	A	G	PASS	missense_variant	MODERATE	ADGRF5	101101312	transcript	XM_006931787.4	protein_coding	18	c.3593T>C	p.Met1198Thr
chrB2	47441021	A	G	PASS	missense_variant	MODERATE	ADGRF5	101101312	transcript	XM_019830688.2	protein_coding	18	c.3593T>C	p.Met1198Thr
chrB2	47441678	A	ATAC	PASS	conservative_inframe_insertion	MODERATE	ADGRF5	101101312	transcript	XM_006931786.4	protein_coding	18	c.2935_2936insGTA	p.Asn978_Ile979insSer
chrB2	47441678	A	ATAC	PASS	conservative_inframe_insertion	MODERATE	ADGRF5	101101312	transcript	XM_003986219.5	protein_coding	17	c.2812_2813insGTA	p.Asn937_Ile938insSer
chrB2	47441678	A	ATAC	PASS	conservative_inframe_insertion	MODERATE	ADGRF5	101101312	transcript	XM_006931788.4	protein_coding	18	c.2932_2933insGTA	p.Asn977_Ile978insSer
chrB2	47441678	A	ATAC	PASS	conservative_inframe_insertion	MODERATE	ADGRF5	101101312	transcript	XM_006931790.4	protein_coding	17	c.2815_2816insGTA	p.Asn938_Ile939insSer
chrB2	47441678	A	ATAC	PASS	conservative_inframe_insertion	MODERATE	ADGRF5	101101312	transcript	XM_023254046.1	protein_coding	18	c.2935_2936insGTA	p.Asn978_Ile979insSer
chrB2	47441678	A	ATAC	PASS	conservative_inframe_insertion	MODERATE	ADGRF5	101101312	transcript	XM_006931787.4	protein_coding	18	c.2935_2936insGTA	p.Asn978_Ile979insSer
chrB2	47441678	A	ATAC	PASS	conservative_inframe_insertion	MODERATE	ADGRF5	101101312	transcript	XM_019830688.2	protein_coding	18	c.2935_2936insGTA	p.Asn978_Ile979insSer
chrB2	47441681	T	A	PASS	missense_variant	MODERATE	ADGRF5	101101312	transcript	XM_006931786.4	protein_coding	18	c.2933A>T	p.Asn978Ile
chrB2	47441681	T	A	PASS	missense_variant	MODERATE	ADGRF5	101101312	transcript	XM_003986219.5	protein_coding	17	c.2810A>T	p.Asn937Ile
chrB2	47441681	T	A	PASS	missense_variant	MODERATE	ADGRF5	101101312	transcript	XM_006931788.4	protein_coding	18	c.2930A>T	p.Asn977Ile
chrB2	47441681	T	A	PASS	missense_variant	MODERATE	ADGRF5	101101312	transcript	XM_006931790.4	protein_coding	17	c.2813A>T	p.Asn938Ile
chrB2	47441681	T	A	PASS	missense_variant	MODERATE	ADGRF5	101101312	transcript	XM_023254046.1	protein_coding	18	c.2933A>T	p.Asn978Ile
chrB2	47441681	T	A	PASS	missense_variant	MODERATE	ADGRF5	101101312	transcript	XM_006931787.4	protein_coding	18	c.2933A>T	p.Asn978Ile
chrB2	47441681	T	A	PASS	missense_variant	MODERATE	ADGRF5	101101312	transcript	XM_019830688.2	protein_coding	18	c.2933A>T	p.Asn978Ile
chrB2	47441682	T	A	PASS	missense_variant	MODERATE	ADGRF5	101101312	transcript	XM_006931786.4	protein_coding	18	c.2932A>T	p.Asn978Tyr
chrB2	47441682	T	A	PASS	missense_variant	MODERATE	ADGRF5	101101312	transcript	XM_003986219.5	protein_coding	17	c.2809A>T	p.Asn937Tyr
chrB2	47441682	T	A	PASS	missense_variant	MODERATE	ADGRF5	101101312	transcript	XM_006931788.4	protein_coding	18	c.2929A>T	p.Asn977Tyr
chrB2	47441682	T	A	PASS	missense_variant	MODERATE	ADGRF5	101101312	transcript	XM_006931790.4	protein_coding	17	c.2812A>T	p.Asn938Tyr
chrB2	47441682	T	A	PASS	missense_variant	MODERATE	ADGRF5	101101312	transcript	XM_023254046.1	protein_coding	18	c.2932A>T	p.Asn978Tyr
chrB2	47441682	T	A	PASS	missense_variant	MODERATE	ADGRF5	101101312	transcript	XM_006931787.4	protein_coding	18	c.2932A>T	p.Asn978Tyr
chrB2	47441682	T	A	PASS	missense_variant	MODERATE	ADGRF5	101101312	transcript	XM_019830688.2	protein_coding	18	c.2932A>T	p.Asn978Tyr
chrB2	47441827	G	C	PASS	missense_variant	MODERATE	ADGRF5	101101312	transcript	XM_006931786.4	protein_coding	18	c.2787C>G	p.His929Gln
chrB2	47441827	G	C	PASS	missense_variant	MODERATE	ADGRF5	101101312	transcript	XM_003986219.5	protein_coding	17	c.2664C>G	p.His888Gln
chrB2	47441827	G	C	PASS	missense_variant	MODERATE	ADGRF5	101101312	transcript	XM_006931788.4	protein_coding	18	c.2784C>G	p.His928Gln
chrB2	47441827	G	C	PASS	missense_variant	MODERATE	ADGRF5	101101312	transcript	XM_006931790.4	protein_coding	17	c.2667C>G	p.His889Gln
chrB2	47441827	G	C	PASS	missense_variant	MODERATE	ADGRF5	101101312	transcript	XM_023254046.1	protein_coding	18	c.2787C>G	p.His929Gln
chrB2	47441827	G	C	PASS	missense_variant	MODERATE	ADGRF5	101101312	transcript	XM_006931787.4	protein_coding	18	c.2787C>G	p.His929Gln
chrB2	47441827	G	C	PASS	missense_variant	MODERATE	ADGRF5	101101312	transcript	XM_019830688.2	protein_coding	18	c.2787C>G	p.His929Gln
chrB2	47444047	T	G	PASS	missense_variant	MODERATE	ADGRF5	101101312	transcript	XM_006931786.4	protein_coding	17	c.2366A>C	p.Lys789Thr
chrB2	47444047	T	G	PASS	missense_variant	MODERATE	ADGRF5	101101312	transcript	XM_003986219.5	protein_coding	16	c.2243A>C	p.Lys748Thr
chrB2	47444047	T	G	PASS	missense_variant	MODERATE	ADGRF5	101101312	transcript	XM_006931788.4	protein_coding	17	c.2363A>C	p.Lys788Thr
chrB2	47444047	T	G	PASS	missense_variant	MODERATE	ADGRF5	101101312	transcript	XM_006931790.4	protein_coding	16	c.2246A>C	p.Lys749Thr
chrB2	47444047	T	G	PASS	missense_variant	MODERATE	ADGRF5	101101312	transcript	XM_023254046.1	protein_coding	17	c.2366A>C	p.Lys789Thr
chrB2	47444047	T	G	PASS	missense_variant	MODERATE	ADGRF5	101101312	transcript	XM_006931787.4	protein_coding	17	c.2366A>C	p.Lys789Thr
chrB2	47444047	T	G	PASS	missense_variant	MODERATE	ADGRF5	101101312	transcript	XM_019830688.2	protein_coding	17	c.2366A>C	p.Lys789Thr
chrB2	47446178	T	C	PASS	missense_variant	MODERATE	ADGRF5	101101312	transcript	XM_006931786.4	protein_coding	16	c.2261A>G	p.Gln754Arg
chrB2	47446178	T	C	PASS	missense_variant	MODERATE	ADGRF5	101101312	transcript	XM_003986219.5	protein_coding	15	c.2138A>G	p.Gln713Arg
chrB2	47446178	T	C	PASS	missense_variant	MODERATE	ADGRF5	101101312	transcript	XM_006931788.4	protein_coding	16	c.2258A>G	p.Gln753Arg
chrB2	47446178	T	C	PASS	missense_variant	MODERATE	ADGRF5	101101312	transcript	XM_006931790.4	protein_coding	15	c.2141A>G	p.Gln714Arg
chrB2	47446178	T	C	PASS	missense_variant	MODERATE	ADGRF5	101101312	transcript	XM_023254046.1	protein_coding	16	c.2261A>G	p.Gln754Arg
chrB2	47446178	T	C	PASS	missense_variant	MODERATE	ADGRF5	101101312	transcript	XM_006931787.4	protein_coding	16	c.2261A>G	p.Gln754Arg
chrB2	47446178	T	C	PASS	missense_variant	MODERATE	ADGRF5	101101312	transcript	XM_019830688.2	protein_coding	16	c.2261A>G	p.Gln754Arg
chrB2	47446203	T	C	PASS	missense_variant	MODERATE	ADGRF5	101101312	transcript	XM_006931786.4	protein_coding	16	c.2236A>G	p.Ile746Val
chrB2	47446203	T	C	PASS	missense_variant	MODERATE	ADGRF5	101101312	transcript	XM_003986219.5	protein_coding	15	c.2113A>G	p.Ile705Val
chrB2	47446203	T	C	PASS	missense_variant	MODERATE	ADGRF5	101101312	transcript	XM_006931788.4	protein_coding	16	c.2233A>G	p.Ile745Val
chrB2	47446203	T	C	PASS	missense_variant	MODERATE	ADGRF5	101101312	transcript	XM_006931790.4	protein_coding	15	c.2116A>G	p.Ile706Val
chrB2	47446203	T	C	PASS	missense_variant	MODERATE	ADGRF5	101101312	transcript	XM_023254046.1	protein_coding	16	c.2236A>G	p.Ile746Val
chrB2	47446203	T	C	PASS	missense_variant	MODERATE	ADGRF5	101101312	transcript	XM_006931787.4	protein_coding	16	c.2236A>G	p.Ile746Val
chrB2	47446203	T	C	PASS	missense_variant	MODERATE	ADGRF5	101101312	transcript	XM_019830688.2	protein_coding	16	c.2236A>G	p.Ile746Val
chrB2	47446240	T	A	PASS	missense_variant	MODERATE	ADGRF5	101101312	transcript	XM_006931786.4	protein_coding	16	c.2199A>T	p.Arg733Ser
chrB2	47446240	T	A	PASS	missense_variant	MODERATE	ADGRF5	101101312	transcript	XM_003986219.5	protein_coding	15	c.2076A>T	p.Arg692Ser
chrB2	47446240	T	A	PASS	missense_variant	MODERATE	ADGRF5	101101312	transcript	XM_006931788.4	protein_coding	16	c.2196A>T	p.Arg732Ser
chrB2	47446240	T	A	PASS	missense_variant	MODERATE	ADGRF5	101101312	transcript	XM_006931790.4	protein_coding	15	c.2079A>T	p.Arg693Ser
chrB2	47446240	T	A	PASS	missense_variant	MODERATE	ADGRF5	101101312	transcript	XM_023254046.1	protein_coding	16	c.2199A>T	p.Arg733Ser
chrB2	47446240	T	A	PASS	missense_variant	MODERATE	ADGRF5	101101312	transcript	XM_006931787.4	protein_coding	16	c.2199A>T	p.Arg733Ser
chrB2	47446240	T	A	PASS	missense_variant	MODERATE	ADGRF5	101101312	transcript	XM_019830688.2	protein_coding	16	c.2199A>T	p.Arg733Ser
chrB2	47446266	T	C	PASS	missense_variant	MODERATE	ADGRF5	101101312	transcript	XM_006931786.4	protein_coding	16	c.2173A>G	p.Ile725Val
chrB2	47446266	T	C	PASS	missense_variant	MODERATE	ADGRF5	101101312	transcript	XM_003986219.5	protein_coding	15	c.2050A>G	p.Ile684Val
chrB2	47446266	T	C	PASS	missense_variant	MODERATE	ADGRF5	101101312	transcript	XM_006931788.4	protein_coding	16	c.2170A>G	p.Ile724Val
chrB2	47446266	T	C	PASS	missense_variant	MODERATE	ADGRF5	101101312	transcript	XM_006931790.4	protein_coding	15	c.2053A>G	p.Ile685Val
chrB2	47446266	T	C	PASS	missense_variant	MODERATE	ADGRF5	101101312	transcript	XM_023254046.1	protein_coding	16	c.2173A>G	p.Ile725Val
chrB2	47446266	T	C	PASS	missense_variant	MODERATE	ADGRF5	101101312	transcript	XM_006931787.4	protein_coding	16	c.2173A>G	p.Ile725Val
chrB2	47446266	T	C	PASS	missense_variant	MODERATE	ADGRF5	101101312	transcript	XM_019830688.2	protein_coding	16	c.2173A>G	p.Ile725Val
chrB2	47450138	T	A	PASS	missense_variant	MODERATE	ADGRF5	101101312	transcript	XM_006931786.4	protein_coding	14	c.1875A>T	p.Lys625Asn
chrB2	47450138	T	A	PASS	missense_variant	MODERATE	ADGRF5	101101312	transcript	XM_003986219.5	protein_coding	13	c.1752A>T	p.Lys584Asn
chrB2	47450138	T	A	PASS	missense_variant	MODERATE	ADGRF5	101101312	transcript	XM_006931788.4	protein_coding	14	c.1872A>T	p.Lys624Asn
chrB2	47450138	T	A	PASS	missense_variant	MODERATE	ADGRF5	101101312	transcript	XM_006931790.4	protein_coding	13	c.1755A>T	p.Lys585Asn
chrB2	47450138	T	A	PASS	missense_variant	MODERATE	ADGRF5	101101312	transcript	XM_023254046.1	protein_coding	14	c.1875A>T	p.Lys625Asn
chrB2	47450138	T	A	PASS	missense_variant	MODERATE	ADGRF5	101101312	transcript	XM_006931787.4	protein_coding	14	c.1875A>T	p.Lys625Asn
chrB2	47450138	T	A	PASS	missense_variant	MODERATE	ADGRF5	101101312	transcript	XM_019830688.2	protein_coding	14	c.1875A>T	p.Lys625Asn
chrB2	47454978	T	C	PASS	missense_variant	MODERATE	ADGRF5	101101312	transcript	XM_006931786.4	protein_coding	11	c.1333A>G	p.Met445Val
chrB2	47454978	T	C	PASS	missense_variant	MODERATE	ADGRF5	101101312	transcript	XM_003986219.5	protein_coding	11	c.1330A>G	p.Met444Val
chrB2	47454978	T	C	PASS	missense_variant	MODERATE	ADGRF5	101101312	transcript	XM_006931788.4	protein_coding	11	c.1330A>G	p.Met444Val
chrB2	47454978	T	C	PASS	missense_variant	MODERATE	ADGRF5	101101312	transcript	XM_006931790.4	protein_coding	11	c.1333A>G	p.Met445Val
chrB2	47454978	T	C	PASS	missense_variant	MODERATE	ADGRF5	101101312	transcript	XM_023254046.1	protein_coding	11	c.1333A>G	p.Met445Val
chrB2	47454978	T	C	PASS	missense_variant	MODERATE	ADGRF5	101101312	transcript	XM_006931787.4	protein_coding	11	c.1333A>G	p.Met445Val
chrB2	47454978	T	C	PASS	missense_variant	MODERATE	ADGRF5	101101312	transcript	XM_019830688.2	protein_coding	11	c.1333A>G	p.Met445Val
chrB2	47460566	C	T	PASS	missense_variant	MODERATE	ADGRF5	101101312	transcript	XM_006931786.4	protein_coding	10	c.1210G>A	p.Val404Ile
chrB2	47460566	C	T	PASS	missense_variant	MODERATE	ADGRF5	101101312	transcript	XM_003986219.5	protein_coding	10	c.1207G>A	p.Val403Ile
chrB2	47460566	C	T	PASS	missense_variant	MODERATE	ADGRF5	101101312	transcript	XM_006931788.4	protein_coding	10	c.1207G>A	p.Val403Ile
chrB2	47460566	C	T	PASS	missense_variant	MODERATE	ADGRF5	101101312	transcript	XM_006931790.4	protein_coding	10	c.1210G>A	p.Val404Ile
chrB2	47460566	C	T	PASS	missense_variant	MODERATE	ADGRF5	101101312	transcript	XM_023254046.1	protein_coding	10	c.1210G>A	p.Val404Ile
chrB2	47460566	C	T	PASS	missense_variant	MODERATE	ADGRF5	101101312	transcript	XM_006931787.4	protein_coding	10	c.1210G>A	p.Val404Ile
chrB2	47460566	C	T	PASS	missense_variant	MODERATE	ADGRF5	101101312	transcript	XM_019830688.2	protein_coding	10	c.1210G>A	p.Val404Ile
chrB2	47468739	G	T	PASS	missense_variant	MODERATE	ADGRF5	101101312	transcript	XM_006931786.4	protein_coding	5	c.410C>A	p.Thr137Asn
chrB2	47468739	G	T	PASS	missense_variant	MODERATE	ADGRF5	101101312	transcript	XM_003986219.5	protein_coding	5	c.410C>A	p.Thr137Asn
chrB2	47468739	G	T	PASS	missense_variant	MODERATE	ADGRF5	101101312	transcript	XM_006931788.4	protein_coding	5	c.410C>A	p.Thr137Asn
chrB2	47468739	G	T	PASS	missense_variant	MODERATE	ADGRF5	101101312	transcript	XM_006931790.4	protein_coding	5	c.410C>A	p.Thr137Asn
chrB2	47468739	G	T	PASS	missense_variant	MODERATE	ADGRF5	101101312	transcript	XM_023254046.1	protein_coding	5	c.410C>A	p.Thr137Asn
chrB2	47468739	G	T	PASS	missense_variant	MODERATE	ADGRF5	101101312	transcript	XM_006931787.4	protein_coding	5	c.410C>A	p.Thr137Asn
chrB2	47468739	G	T	PASS	missense_variant	MODERATE	ADGRF5	101101312	transcript	XM_019830688.2	protein_coding	5	c.410C>A	p.Thr137Asn
chrB2	47470939	C	A	PASS	missense_variant	MODERATE	ADGRF5	101101312	transcript	XM_006931786.4	protein_coding	4	c.173G>T	p.Gly58Val
chrB2	47470939	C	A	PASS	missense_variant	MODERATE	ADGRF5	101101312	transcript	XM_003986219.5	protein_coding	4	c.173G>T	p.Gly58Val
chrB2	47470939	C	A	PASS	missense_variant	MODERATE	ADGRF5	101101312	transcript	XM_006931788.4	protein_coding	4	c.173G>T	p.Gly58Val
chrB2	47470939	C	A	PASS	missense_variant	MODERATE	ADGRF5	101101312	transcript	XM_006931790.4	protein_coding	4	c.173G>T	p.Gly58Val
chrB2	47470939	C	A	PASS	missense_variant	MODERATE	ADGRF5	101101312	transcript	XM_023254046.1	protein_coding	4	c.173G>T	p.Gly58Val
chrB2	47470939	C	A	PASS	missense_variant	MODERATE	ADGRF5	101101312	transcript	XM_006931787.4	protein_coding	4	c.173G>T	p.Gly58Val
chrB2	47470939	C	A	PASS	missense_variant	MODERATE	ADGRF5	101101312	transcript	XM_019830688.2	protein_coding	4	c.173G>T	p.Gly58Val
chrB2	47481697	G	T	PASS	missense_variant	MODERATE	ADGRF5	101101312	transcript	XM_006931786.4	protein_coding	3	c.125C>A	p.Ala42Glu
chrB2	47481697	G	T	PASS	missense_variant	MODERATE	ADGRF5	101101312	transcript	XM_003986219.5	protein_coding	3	c.125C>A	p.Ala42Glu
chrB2	47481697	G	T	PASS	missense_variant	MODERATE	ADGRF5	101101312	transcript	XM_006931788.4	protein_coding	3	c.125C>A	p.Ala42Glu
chrB2	47481697	G	T	PASS	missense_variant	MODERATE	ADGRF5	101101312	transcript	XM_006931790.4	protein_coding	3	c.125C>A	p.Ala42Glu
chrB2	47481697	G	T	PASS	missense_variant	MODERATE	ADGRF5	101101312	transcript	XM_023254046.1	protein_coding	3	c.125C>A	p.Ala42Glu
chrB2	47481697	G	T	PASS	missense_variant	MODERATE	ADGRF5	101101312	transcript	XM_006931787.4	protein_coding	3	c.125C>A	p.Ala42Glu
chrB2	47481697	G	T	PASS	missense_variant	MODERATE	ADGRF5	101101312	transcript	XM_019830688.2	protein_coding	3	c.125C>A	p.Ala42Glu
chrB2	47488761	C	A	PASS	missense_variant	MODERATE	ADGRF5	101101312	transcript	XM_006931786.4	protein_coding	2	c.54G>T	p.Leu18Phe
chrB2	47488761	C	A	PASS	missense_variant	MODERATE	ADGRF5	101101312	transcript	XM_003986219.5	protein_coding	2	c.54G>T	p.Leu18Phe
chrB2	47488761	C	A	PASS	missense_variant	MODERATE	ADGRF5	101101312	transcript	XM_006931788.4	protein_coding	2	c.54G>T	p.Leu18Phe
chrB2	47488761	C	A	PASS	missense_variant	MODERATE	ADGRF5	101101312	transcript	XM_006931790.4	protein_coding	2	c.54G>T	p.Leu18Phe
chrB2	47488761	C	A	PASS	missense_variant	MODERATE	ADGRF5	101101312	transcript	XM_023254046.1	protein_coding	2	c.54G>T	p.Leu18Phe
chrB2	47488761	C	A	PASS	missense_variant	MODERATE	ADGRF5	101101312	transcript	XM_006931787.4	protein_coding	2	c.54G>T	p.Leu18Phe
chrB2	47488761	C	A	PASS	missense_variant	MODERATE	ADGRF5	101101312	transcript	XM_019830688.2	protein_coding	2	c.54G>T	p.Leu18Phe
chrB2	47583056	G	A	PASS	missense_variant	MODERATE	ADGRF1	101101565	transcript	XM_006931791.4	protein_coding	15	c.2630C>T	p.Pro877Leu
chrB2	47590938	T	C	PASS	missense_variant	MODERATE	ADGRF1	101101565	transcript	XM_006931791.4	protein_coding	12	c.2450A>G	p.Asn817Ser
chrB2	47591301	A	G	PASS	missense_variant	MODERATE	ADGRF1	101101565	transcript	XM_006931791.4	protein_coding	12	c.2087T>C	p.Met696Thr
chrB2	47591484	A	G	PASS	missense_variant	MODERATE	ADGRF1	101101565	transcript	XM_006931791.4	protein_coding	12	c.1904T>C	p.Leu635Ser
chrB2	47592058	A	C	PASS	missense_variant	MODERATE	ADGRF1	101101565	transcript	XM_006931791.4	protein_coding	11	c.1331T>G	p.Leu444Arg
chrB2	47595016	C	T	PASS	missense_variant	MODERATE	ADGRF1	101101565	transcript	XM_006931791.4	protein_coding	10	c.1072G>A	p.Val358Ile
chrB2	47597573	C	A	PASS	missense_variant	MODERATE	ADGRF1	101101565	transcript	XM_006931791.4	protein_coding	8	c.636G>T	p.Met212Ile
chrB2	47606079	A	G	PASS	missense_variant	MODERATE	ADGRF1	101101565	transcript	XM_006931791.4	protein_coding	4	c.263T>C	p.Val88Ala
chrB2	47608223	T	C	PASS	missense_variant	MODERATE	ADGRF1	101101565	transcript	XM_006931791.4	protein_coding	3	c.73A>G	p.Asn25Asp
chrB2	140994899	T	C	PASS	missense_variant	MODERATE	LOC111560607	111560607	transcript	XM_023254741.1	protein_coding	7	c.2957A>G	p.Gln986Arg
chrB2	140997713	G	A	PASS	missense_variant	MODERATE	LOC111560607	111560607	transcript	XM_023254741.1	protein_coding	1	c.740C>T	p.Pro247Leu
chrB2	151325503	C	T	PASS	missense_variant	MODERATE	PDE10A	101098715	transcript	XM_023254561.1	protein_coding	15	c.1555G>A	p.Val519Ile
chrB2	151325503	C	T	PASS	missense_variant	MODERATE	PDE10A	101098715	transcript	XM_019831471.2	protein_coding	14	c.1324G>A	p.Val442Ile
chrB2	151325503	C	T	PASS	missense_variant	MODERATE	PDE10A	101098715	transcript	XM_006932134.4	protein_coding	15	c.1429G>A	p.Val477Ile
chrB2	151325503	C	T	PASS	missense_variant	MODERATE	PDE10A	101098715	transcript	XM_023254562.1	protein_coding	15	c.1507G>A	p.Val503Ile
chrB2	151325503	C	T	PASS	missense_variant	MODERATE	PDE10A	101098715	transcript	XM_023254563.1	protein_coding	15	c.1480G>A	p.Val494Ile
chrB2	151325503	C	T	PASS	missense_variant	MODERATE	PDE10A	101098715	transcript	XM_023254564.1	protein_coding	16	c.1462G>A	p.Val488Ile
chrB2	151325503	C	T	PASS	missense_variant	MODERATE	PDE10A	101098715	transcript	XM_023254565.1	protein_coding	15	c.1555G>A	p.Val519Ile
chrB2	151401518	G	A	PASS	missense_variant	MODERATE	PDE10A	101098715	transcript	XM_019831471.2	protein_coding	1	c.17C>T	p.Thr6Met
chrB2	153301977	G	A	PASS	missense_variant	MODERATE	AFDN	101081386	transcript	XM_023254578.1	protein_coding	13	c.1678G>A	p.Gly560Ser
chrB2	153301977	G	A	PASS	missense_variant	MODERATE	AFDN	101081386	transcript	XM_023254579.1	protein_coding	13	c.1675G>A	p.Gly559Ser
chrB2	153301977	G	A	PASS	missense_variant	MODERATE	AFDN	101081386	transcript	XM_023254580.1	protein_coding	13	c.1675G>A	p.Gly559Ser
chrB2	153301977	G	A	PASS	missense_variant	MODERATE	AFDN	101081386	transcript	XM_023254581.1	protein_coding	13	c.1678G>A	p.Gly560Ser
chrB2	153301977	G	A	PASS	missense_variant	MODERATE	AFDN	101081386	transcript	XM_023254582.1	protein_coding	13	c.1678G>A	p.Gly560Ser
chrB2	153301977	G	A	PASS	missense_variant	MODERATE	AFDN	101081386	transcript	XM_023254585.1	protein_coding	13	c.1678G>A	p.Gly560Ser
chrB2	153301977	G	A	PASS	missense_variant	MODERATE	AFDN	101081386	transcript	XM_023254587.1	protein_coding	12	c.1621G>A	p.Gly541Ser
chrB2	153301977	G	A	PASS	missense_variant	MODERATE	AFDN	101081386	transcript	XM_023254592.1	protein_coding	13	c.1675G>A	p.Gly559Ser
chrB2	153301977	G	A	PASS	missense_variant	MODERATE	AFDN	101081386	transcript	XM_023254583.1	protein_coding	13	c.1678G>A	p.Gly560Ser
chrB2	153301977	G	A	PASS	missense_variant	MODERATE	AFDN	101081386	transcript	XM_023254584.1	protein_coding	13	c.1678G>A	p.Gly560Ser
chrB2	153301977	G	A	PASS	missense_variant	MODERATE	AFDN	101081386	transcript	XM_023254586.1	protein_coding	12	c.1627G>A	p.Gly543Ser
chrB2	153301977	G	A	PASS	missense_variant	MODERATE	AFDN	101081386	transcript	XM_023254588.1	protein_coding	13	c.1678G>A	p.Gly560Ser
chrB2	153301977	G	A	PASS	missense_variant	MODERATE	AFDN	101081386	transcript	XM_023254589.1	protein_coding	13	c.1678G>A	p.Gly560Ser
chrB2	153301977	G	A	PASS	missense_variant	MODERATE	AFDN	101081386	transcript	XM_023254590.1	protein_coding	13	c.1675G>A	p.Gly559Ser
chrB2	153301977	G	A	PASS	missense_variant	MODERATE	AFDN	101081386	transcript	XM_023254591.1	protein_coding	12	c.1621G>A	p.Gly541Ser
chrB2	153318302	G	A	PASS	missense_variant	MODERATE	AFDN	101081386	transcript	XM_023254578.1	protein_coding	20	c.2707G>A	p.Val903Ile
chrB2	153318302	G	A	PASS	missense_variant	MODERATE	AFDN	101081386	transcript	XM_023254579.1	protein_coding	20	c.2704G>A	p.Val902Ile
chrB2	153318302	G	A	PASS	missense_variant	MODERATE	AFDN	101081386	transcript	XM_023254580.1	protein_coding	20	c.2704G>A	p.Val902Ile
chrB2	153318302	G	A	PASS	missense_variant	MODERATE	AFDN	101081386	transcript	XM_023254581.1	protein_coding	20	c.2707G>A	p.Val903Ile
chrB2	153318302	G	A	PASS	missense_variant	MODERATE	AFDN	101081386	transcript	XM_023254582.1	protein_coding	19	c.2686G>A	p.Val896Ile
chrB2	153318302	G	A	PASS	missense_variant	MODERATE	AFDN	101081386	transcript	XM_023254585.1	protein_coding	20	c.2707G>A	p.Val903Ile
chrB2	153318302	G	A	PASS	missense_variant	MODERATE	AFDN	101081386	transcript	XM_023254587.1	protein_coding	18	c.2629G>A	p.Val877Ile
chrB2	153318302	G	A	PASS	missense_variant	MODERATE	AFDN	101081386	transcript	XM_023254592.1	protein_coding	19	c.2683G>A	p.Val895Ile
chrB2	153318302	G	A	PASS	missense_variant	MODERATE	AFDN	101081386	transcript	XM_023254583.1	protein_coding	20	c.2707G>A	p.Val903Ile
chrB2	153318302	G	A	PASS	missense_variant	MODERATE	AFDN	101081386	transcript	XM_023254584.1	protein_coding	20	c.2707G>A	p.Val903Ile
chrB2	153318302	G	A	PASS	missense_variant	MODERATE	AFDN	101081386	transcript	XM_023254586.1	protein_coding	19	c.2656G>A	p.Val886Ile
chrB2	153318302	G	A	PASS	missense_variant	MODERATE	AFDN	101081386	transcript	XM_023254588.1	protein_coding	19	c.2686G>A	p.Val896Ile
chrB2	153318302	G	A	PASS	missense_variant	MODERATE	AFDN	101081386	transcript	XM_023254589.1	protein_coding	19	c.2686G>A	p.Val896Ile
chrB2	153318302	G	A	PASS	missense_variant	MODERATE	AFDN	101081386	transcript	XM_023254590.1	protein_coding	19	c.2683G>A	p.Val895Ile
chrB2	153318302	G	A	PASS	missense_variant	MODERATE	AFDN	101081386	transcript	XM_023254591.1	protein_coding	18	c.2629G>A	p.Val877Ile
chrB2	153339943	T	G	PASS	missense_variant	MODERATE	AFDN	101081386	transcript	XM_023254578.1	protein_coding	24	c.3120T>G	p.Asp1040Glu
chrB2	153339943	T	G	PASS	missense_variant	MODERATE	AFDN	101081386	transcript	XM_023254579.1	protein_coding	24	c.3117T>G	p.Asp1039Glu
chrB2	153339943	T	G	PASS	missense_variant	MODERATE	AFDN	101081386	transcript	XM_023254580.1	protein_coding	24	c.3117T>G	p.Asp1039Glu
chrB2	153339943	T	G	PASS	missense_variant	MODERATE	AFDN	101081386	transcript	XM_023254581.1	protein_coding	24	c.3120T>G	p.Asp1040Glu
chrB2	153339943	T	G	PASS	missense_variant	MODERATE	AFDN	101081386	transcript	XM_023254582.1	protein_coding	23	c.3099T>G	p.Asp1033Glu
chrB2	153339943	T	G	PASS	missense_variant	MODERATE	AFDN	101081386	transcript	XM_023254585.1	protein_coding	24	c.3120T>G	p.Asp1040Glu
chrB2	153339943	T	G	PASS	missense_variant	MODERATE	AFDN	101081386	transcript	XM_023254587.1	protein_coding	22	c.3042T>G	p.Asp1014Glu
chrB2	153339943	T	G	PASS	missense_variant	MODERATE	AFDN	101081386	transcript	XM_023254592.1	protein_coding	23	c.3096T>G	p.Asp1032Glu
chrB2	153339943	T	G	PASS	missense_variant	MODERATE	AFDN	101081386	transcript	XM_023254583.1	protein_coding	24	c.3120T>G	p.Asp1040Glu
chrB2	153339943	T	G	PASS	missense_variant	MODERATE	AFDN	101081386	transcript	XM_023254584.1	protein_coding	24	c.3120T>G	p.Asp1040Glu
chrB2	153339943	T	G	PASS	missense_variant	MODERATE	AFDN	101081386	transcript	XM_023254586.1	protein_coding	23	c.3069T>G	p.Asp1023Glu
chrB2	153339943	T	G	PASS	missense_variant	MODERATE	AFDN	101081386	transcript	XM_023254588.1	protein_coding	23	c.3099T>G	p.Asp1033Glu
chrB2	153339943	T	G	PASS	missense_variant	MODERATE	AFDN	101081386	transcript	XM_023254589.1	protein_coding	23	c.3099T>G	p.Asp1033Glu
chrB2	153339943	T	G	PASS	missense_variant	MODERATE	AFDN	101081386	transcript	XM_023254590.1	protein_coding	23	c.3096T>G	p.Asp1032Glu
chrB2	153339943	T	G	PASS	missense_variant	MODERATE	AFDN	101081386	transcript	XM_023254591.1	protein_coding	22	c.3042T>G	p.Asp1014Glu
chrB2	153343789	A	G	PASS	missense_variant	MODERATE	AFDN	101081386	transcript	XM_023254578.1	protein_coding	29	c.3779A>G	p.Asn1260Ser
chrB2	153343789	A	G	PASS	missense_variant	MODERATE	AFDN	101081386	transcript	XM_023254579.1	protein_coding	29	c.3776A>G	p.Asn1259Ser
chrB2	153343789	A	G	PASS	missense_variant	MODERATE	AFDN	101081386	transcript	XM_023254580.1	protein_coding	29	c.3776A>G	p.Asn1259Ser
chrB2	153343789	A	G	PASS	missense_variant	MODERATE	AFDN	101081386	transcript	XM_023254581.1	protein_coding	29	c.3779A>G	p.Asn1260Ser
chrB2	153343789	A	G	PASS	missense_variant	MODERATE	AFDN	101081386	transcript	XM_023254582.1	protein_coding	28	c.3758A>G	p.Asn1253Ser
chrB2	153343789	A	G	PASS	missense_variant	MODERATE	AFDN	101081386	transcript	XM_023254585.1	protein_coding	29	c.3779A>G	p.Asn1260Ser
chrB2	153343789	A	G	PASS	missense_variant	MODERATE	AFDN	101081386	transcript	XM_023254587.1	protein_coding	27	c.3701A>G	p.Asn1234Ser
chrB2	153343789	A	G	PASS	missense_variant	MODERATE	AFDN	101081386	transcript	XM_023254592.1	protein_coding	28	c.3755A>G	p.Asn1252Ser
chrB2	153343789	A	G	PASS	missense_variant	MODERATE	AFDN	101081386	transcript	XM_023254583.1	protein_coding	29	c.3779A>G	p.Asn1260Ser
chrB2	153343789	A	G	PASS	missense_variant	MODERATE	AFDN	101081386	transcript	XM_023254584.1	protein_coding	29	c.3779A>G	p.Asn1260Ser
chrB2	153343789	A	G	PASS	missense_variant	MODERATE	AFDN	101081386	transcript	XM_023254586.1	protein_coding	28	c.3728A>G	p.Asn1243Ser
chrB2	153343789	A	G	PASS	missense_variant	MODERATE	AFDN	101081386	transcript	XM_023254588.1	protein_coding	28	c.3758A>G	p.Asn1253Ser
chrB2	153343789	A	G	PASS	missense_variant	MODERATE	AFDN	101081386	transcript	XM_023254589.1	protein_coding	28	c.3758A>G	p.Asn1253Ser
chrB2	153343789	A	G	PASS	missense_variant	MODERATE	AFDN	101081386	transcript	XM_023254590.1	protein_coding	28	c.3755A>G	p.Asn1252Ser
chrB2	153343789	A	G	PASS	missense_variant	MODERATE	AFDN	101081386	transcript	XM_023254591.1	protein_coding	27	c.3701A>G	p.Asn1234Ser
chrB2	153359236	G	C	PASS	missense_variant	MODERATE	AFDN	101081386	transcript	XM_023254578.1	protein_coding	33	c.5098G>C	p.Ala1700Pro
chrB2	153359236	G	C	PASS	missense_variant	MODERATE	AFDN	101081386	transcript	XM_023254579.1	protein_coding	33	c.5095G>C	p.Ala1699Pro
chrB2	153359236	G	C	PASS	missense_variant	MODERATE	AFDN	101081386	transcript	XM_023254580.1	protein_coding	33	c.5095G>C	p.Ala1699Pro
chrB2	153359236	G	C	PASS	missense_variant	MODERATE	AFDN	101081386	transcript	XM_023254581.1	protein_coding	33	c.5092G>C	p.Ala1698Pro
chrB2	153359236	G	C	PASS	missense_variant	MODERATE	AFDN	101081386	transcript	XM_023254582.1	protein_coding	32	c.5077G>C	p.Ala1693Pro
chrB2	153359236	G	C	PASS	missense_variant	MODERATE	AFDN	101081386	transcript	XM_023254585.1	protein_coding	32	c.5056G>C	p.Ala1686Pro
chrB2	153359236	G	C	PASS	missense_variant	MODERATE	AFDN	101081386	transcript	XM_023254587.1	protein_coding	31	c.5020G>C	p.Ala1674Pro
chrB2	153359236	G	C	PASS	missense_variant	MODERATE	AFDN	101081386	transcript	XM_023254583.1	protein_coding	33	c.5098G>C	p.Ala1700Pro
chrB2	153359236	G	C	PASS	missense_variant	MODERATE	AFDN	101081386	transcript	XM_023254584.1	protein_coding	32	c.5062G>C	p.Ala1688Pro
chrB2	153359236	G	C	PASS	missense_variant	MODERATE	AFDN	101081386	transcript	XM_023254586.1	protein_coding	32	c.5047G>C	p.Ala1683Pro
chrB2	153359236	G	C	PASS	missense_variant	MODERATE	AFDN	101081386	transcript	XM_023254588.1	protein_coding	31	c.5041G>C	p.Ala1681Pro
chrB2	153359236	G	C	PASS	missense_variant	MODERATE	AFDN	101081386	transcript	XM_023254589.1	protein_coding	31	c.5035G>C	p.Ala1679Pro
chrB2	153359236	G	C	PASS	missense_variant	MODERATE	AFDN	101081386	transcript	XM_023254590.1	protein_coding	31	c.5038G>C	p.Ala1680Pro
chrB2	153370218	G	GCGA	PASS	conservative_inframe_insertion	MODERATE	KIF25	101081637	transcript	XM_023254593.1	protein_coding	1	c.9_10insACG	p.Ala3_Ala4insThr
chrB2	153370218	G	GCGA	PASS	conservative_inframe_insertion	MODERATE	KIF25	101081637	transcript	XM_023254594.1	protein_coding	1	c.9_10insACG	p.Ala3_Ala4insThr
chrB2	153370218	G	GCGA	PASS	conservative_inframe_insertion	MODERATE	KIF25	101081637	transcript	XM_023254595.1	protein_coding	1	c.9_10insACG	p.Ala3_Ala4insThr
chrB2	153370239	G	A	PASS	missense_variant	MODERATE	KIF25	101081637	transcript	XM_023254593.1	protein_coding	1	c.28G>A	p.Gly10Arg
chrB2	153370239	G	A	PASS	missense_variant	MODERATE	KIF25	101081637	transcript	XM_023254594.1	protein_coding	1	c.28G>A	p.Gly10Arg
chrB2	153370239	G	A	PASS	missense_variant	MODERATE	KIF25	101081637	transcript	XM_023254595.1	protein_coding	1	c.28G>A	p.Gly10Arg
chrB2	153379691	T	A	PASS	missense_variant	MODERATE	KIF25	101081637	transcript	XM_023254593.1	protein_coding	2	c.88T>A	p.Trp30Arg
chrB2	153379691	T	A	PASS	missense_variant	MODERATE	KIF25	101081637	transcript	XM_023254594.1	protein_coding	2	c.88T>A	p.Trp30Arg
chrB2	153379691	T	A	PASS	missense_variant	MODERATE	KIF25	101081637	transcript	XM_023254595.1	protein_coding	2	c.88T>A	p.Trp30Arg
chrB2	153388893	T	C	PASS	missense_variant	MODERATE	KIF25	101081637	transcript	XM_023254593.1	protein_coding	5	c.436T>C	p.Cys146Arg
chrB2	153388893	T	C	PASS	missense_variant	MODERATE	KIF25	101081637	transcript	XM_023254594.1	protein_coding	5	c.436T>C	p.Cys146Arg
chrB2	153388893	T	C	PASS	missense_variant	MODERATE	KIF25	101081637	transcript	XM_023254595.1	protein_coding	5	c.436T>C	p.Cys146Arg
chrB2	153390477	A	G	PASS	missense_variant	MODERATE	KIF25	101081637	transcript	XM_023254593.1	protein_coding	6	c.590A>G	p.Gln197Arg
chrB2	153390477	A	G	PASS	missense_variant	MODERATE	KIF25	101081637	transcript	XM_023254594.1	protein_coding	6	c.590A>G	p.Gln197Arg
chrB2	153390477	A	G	PASS	missense_variant	MODERATE	KIF25	101081637	transcript	XM_023254595.1	protein_coding	6	c.590A>G	p.Gln197Arg
chrB2	153400619	A	G	PASS	missense_variant	MODERATE	KIF25	101081637	transcript	XM_023254593.1	protein_coding	8	c.676A>G	p.Ile226Val
chrB2	153400619	A	G	PASS	missense_variant	MODERATE	KIF25	101081637	transcript	XM_023254594.1	protein_coding	8	c.676A>G	p.Ile226Val
chrB2	153400619	A	G	PASS	missense_variant	MODERATE	KIF25	101081637	transcript	XM_023254595.1	protein_coding	8	c.676A>G	p.Ile226Val
chrB2	153407842	C	T	PASS	missense_variant	MODERATE	KIF25	101081637	transcript	XM_023254593.1	protein_coding	9	c.770C>T	p.Ser257Leu
chrB2	153407842	C	T	PASS	missense_variant	MODERATE	KIF25	101081637	transcript	XM_023254594.1	protein_coding	9	c.770C>T	p.Ser257Leu
chrB2	153407842	C	T	PASS	missense_variant	MODERATE	KIF25	101081637	transcript	XM_023254595.1	protein_coding	9	c.770C>T	p.Ser257Leu
chrB2	153413946	T	G	PASS	missense_variant	MODERATE	KIF25	101081637	transcript	XM_023254593.1	protein_coding	11	c.1087T>G	p.Cys363Gly
chrB2	153413946	T	G	PASS	missense_variant	MODERATE	KIF25	101081637	transcript	XM_023254594.1	protein_coding	10	c.937T>G	p.Cys313Gly
chrB2	153413946	T	G	PASS	missense_variant	MODERATE	KIF25	101081637	transcript	XM_023254595.1	protein_coding	11	c.1087T>G	p.Cys363Gly
chrB2	153416220	A	G	PASS	missense_variant	MODERATE	KIF25	101081637	transcript	XM_023254593.1	protein_coding	13	c.1262A>G	p.His421Arg
chrB2	153416220	A	G	PASS	missense_variant	MODERATE	KIF25	101081637	transcript	XM_023254594.1	protein_coding	12	c.1112A>G	p.His371Arg
chrB2	153416220	A	G	PASS	missense_variant	MODERATE	KIF25	101081637	transcript	XM_023254595.1	protein_coding	13	c.1262A>G	p.His421Arg
chrB2	153416229	C	G	PASS	missense_variant	MODERATE	KIF25	101081637	transcript	XM_023254593.1	protein_coding	13	c.1271C>G	p.Pro424Arg
chrB2	153416229	C	G	PASS	missense_variant	MODERATE	KIF25	101081637	transcript	XM_023254594.1	protein_coding	12	c.1121C>G	p.Pro374Arg
chrB2	153416229	C	G	PASS	missense_variant	MODERATE	KIF25	101081637	transcript	XM_023254595.1	protein_coding	13	c.1271C>G	p.Pro424Arg
chrB2	153416276	C	T	PASS	missense_variant	MODERATE	KIF25	101081637	transcript	XM_023254593.1	protein_coding	13	c.1318C>T	p.Arg440Trp
chrB2	153416276	C	T	PASS	missense_variant	MODERATE	KIF25	101081637	transcript	XM_023254594.1	protein_coding	12	c.1168C>T	p.Arg390Trp
chrB2	153416276	C	T	PASS	missense_variant	MODERATE	KIF25	101081637	transcript	XM_023254595.1	protein_coding	13	c.1318C>T	p.Arg440Trp
chrB2	153416281	A	C	PASS	missense_variant	MODERATE	KIF25	101081637	transcript	XM_023254593.1	protein_coding	13	c.1323A>C	p.Arg441Ser
chrB2	153416281	A	C	PASS	missense_variant	MODERATE	KIF25	101081637	transcript	XM_023254594.1	protein_coding	12	c.1173A>C	p.Arg391Ser
chrB2	153416281	A	C	PASS	missense_variant	MODERATE	KIF25	101081637	transcript	XM_023254595.1	protein_coding	13	c.1323A>C	p.Arg441Ser
chrB2	153417057	T	C	PASS	missense_variant	MODERATE	KIF25	101081637	transcript	XM_023254593.1	protein_coding	14	c.1766T>C	p.Leu589Ser
chrB2	153417057	T	C	PASS	missense_variant	MODERATE	KIF25	101081637	transcript	XM_023254594.1	protein_coding	13	c.1616T>C	p.Leu539Ser
chrB2	153417085	C	G	PASS	missense_variant	MODERATE	KIF25	101081637	transcript	XM_023254593.1	protein_coding	14	c.1794C>G	p.Phe598Leu
chrB2	153417085	C	G	PASS	missense_variant	MODERATE	KIF25	101081637	transcript	XM_023254594.1	protein_coding	13	c.1644C>G	p.Phe548Leu
chrB2	153417240	C	G	PASS	missense_variant	MODERATE	KIF25	101081637	transcript	XM_023254593.1	protein_coding	14	c.1949C>G	p.Pro650Arg
chrB2	153417240	C	G	PASS	missense_variant	MODERATE	KIF25	101081637	transcript	XM_023254594.1	protein_coding	13	c.1799C>G	p.Pro600Arg
chrB2	153417242	G	T	PASS	missense_variant	MODERATE	KIF25	101081637	transcript	XM_023254593.1	protein_coding	14	c.1951G>T	p.Ala651Ser
chrB2	153417242	G	T	PASS	missense_variant	MODERATE	KIF25	101081637	transcript	XM_023254594.1	protein_coding	13	c.1801G>T	p.Ala601Ser
chrB2	153417243	C	T	PASS	missense_variant	MODERATE	KIF25	101081637	transcript	XM_023254593.1	protein_coding	14	c.1952C>T	p.Ala651Val
chrB2	153417243	C	T	PASS	missense_variant	MODERATE	KIF25	101081637	transcript	XM_023254594.1	protein_coding	13	c.1802C>T	p.Ala601Val
chrB2	153426353	T	G	PASS	missense_variant	MODERATE	FRMD1	101081897	transcript	XM_023254596.1	protein_coding	10	c.1748A>C	p.Glu583Ala
chrB2	153426353	T	G	PASS	missense_variant	MODERATE	FRMD1	101081897	transcript	XM_023254597.1	protein_coding	10	c.1748A>C	p.Glu583Ala
chrB2	153426353	T	G	PASS	missense_variant	MODERATE	FRMD1	101081897	transcript	XM_023254598.1	protein_coding	10	c.1748A>C	p.Glu583Ala
chrB2	153426353	T	G	PASS	missense_variant	MODERATE	FRMD1	101081897	transcript	XM_023254599.1	protein_coding	10	c.1739A>C	p.Glu580Ala
chrB2	153426353	T	G	PASS	missense_variant	MODERATE	FRMD1	101081897	transcript	XM_019831640.2	protein_coding	13	c.1379A>C	p.Glu460Ala
chrB2	153426353	T	G	PASS	missense_variant	MODERATE	FRMD1	101081897	transcript	XM_023254602.1	protein_coding	11	c.1217A>C	p.Glu406Ala
chrB2	153426353	T	G	PASS	missense_variant	MODERATE	FRMD1	101081897	transcript	XM_023254600.1	protein_coding	13	c.1388A>C	p.Glu463Ala
chrB2	153426353	T	G	PASS	missense_variant	MODERATE	FRMD1	101081897	transcript	XM_023254601.1	protein_coding	12	c.1388A>C	p.Glu463Ala
chrB2	153430137	C	A	PASS	missense_variant	MODERATE	FRMD1	101081897	transcript	XM_023254596.1	protein_coding	9	c.1661G>T	p.Gly554Val
chrB2	153430137	C	A	PASS	missense_variant	MODERATE	FRMD1	101081897	transcript	XM_023254597.1	protein_coding	9	c.1661G>T	p.Gly554Val
chrB2	153430137	C	A	PASS	missense_variant	MODERATE	FRMD1	101081897	transcript	XM_023254598.1	protein_coding	9	c.1661G>T	p.Gly554Val
chrB2	153430137	C	A	PASS	missense_variant	MODERATE	FRMD1	101081897	transcript	XM_023254599.1	protein_coding	9	c.1652G>T	p.Gly551Val
chrB2	153430137	C	A	PASS	missense_variant	MODERATE	FRMD1	101081897	transcript	XM_019831640.2	protein_coding	12	c.1292G>T	p.Gly431Val
chrB2	153430137	C	A	PASS	missense_variant	MODERATE	FRMD1	101081897	transcript	XM_023254602.1	protein_coding	10	c.1130G>T	p.Gly377Val
chrB2	153430137	C	A	PASS	missense_variant	MODERATE	FRMD1	101081897	transcript	XM_023254600.1	protein_coding	12	c.1301G>T	p.Gly434Val
chrB2	153430137	C	A	PASS	missense_variant	MODERATE	FRMD1	101081897	transcript	XM_023254601.1	protein_coding	11	c.1301G>T	p.Gly434Val
chrB2	153430209	G	A	PASS	missense_variant	MODERATE	FRMD1	101081897	transcript	XM_023254596.1	protein_coding	9	c.1589C>T	p.Ala530Val
chrB2	153430209	G	A	PASS	missense_variant	MODERATE	FRMD1	101081897	transcript	XM_023254597.1	protein_coding	9	c.1589C>T	p.Ala530Val
chrB2	153430209	G	A	PASS	missense_variant	MODERATE	FRMD1	101081897	transcript	XM_023254598.1	protein_coding	9	c.1589C>T	p.Ala530Val
chrB2	153430209	G	A	PASS	missense_variant	MODERATE	FRMD1	101081897	transcript	XM_023254599.1	protein_coding	9	c.1580C>T	p.Ala527Val
chrB2	153430209	G	A	PASS	missense_variant	MODERATE	FRMD1	101081897	transcript	XM_019831640.2	protein_coding	12	c.1220C>T	p.Ala407Val
chrB2	153430209	G	A	PASS	missense_variant	MODERATE	FRMD1	101081897	transcript	XM_023254602.1	protein_coding	10	c.1058C>T	p.Ala353Val
chrB2	153430209	G	A	PASS	missense_variant	MODERATE	FRMD1	101081897	transcript	XM_023254600.1	protein_coding	12	c.1229C>T	p.Ala410Val
chrB2	153430209	G	A	PASS	missense_variant	MODERATE	FRMD1	101081897	transcript	XM_023254601.1	protein_coding	11	c.1229C>T	p.Ala410Val
chrB2	153430218	C	A	PASS	missense_variant	MODERATE	FRMD1	101081897	transcript	XM_023254596.1	protein_coding	9	c.1580G>T	p.Cys527Phe
chrB2	153430218	C	A	PASS	missense_variant	MODERATE	FRMD1	101081897	transcript	XM_023254597.1	protein_coding	9	c.1580G>T	p.Cys527Phe
chrB2	153430218	C	A	PASS	missense_variant	MODERATE	FRMD1	101081897	transcript	XM_023254598.1	protein_coding	9	c.1580G>T	p.Cys527Phe
chrB2	153430218	C	A	PASS	missense_variant	MODERATE	FRMD1	101081897	transcript	XM_023254599.1	protein_coding	9	c.1571G>T	p.Cys524Phe
chrB2	153430218	C	A	PASS	missense_variant	MODERATE	FRMD1	101081897	transcript	XM_019831640.2	protein_coding	12	c.1211G>T	p.Cys404Phe
chrB2	153430218	C	A	PASS	missense_variant	MODERATE	FRMD1	101081897	transcript	XM_023254602.1	protein_coding	10	c.1049G>T	p.Cys350Phe
chrB2	153430218	C	A	PASS	missense_variant	MODERATE	FRMD1	101081897	transcript	XM_023254600.1	protein_coding	12	c.1220G>T	p.Cys407Phe
chrB2	153430218	C	A	PASS	missense_variant	MODERATE	FRMD1	101081897	transcript	XM_023254601.1	protein_coding	11	c.1220G>T	p.Cys407Phe
chrB2	153430219	A	G	PASS	missense_variant	MODERATE	FRMD1	101081897	transcript	XM_023254596.1	protein_coding	9	c.1579T>C	p.Cys527Arg
chrB2	153430219	A	G	PASS	missense_variant	MODERATE	FRMD1	101081897	transcript	XM_023254597.1	protein_coding	9	c.1579T>C	p.Cys527Arg
chrB2	153430219	A	G	PASS	missense_variant	MODERATE	FRMD1	101081897	transcript	XM_023254598.1	protein_coding	9	c.1579T>C	p.Cys527Arg
chrB2	153430219	A	G	PASS	missense_variant	MODERATE	FRMD1	101081897	transcript	XM_023254599.1	protein_coding	9	c.1570T>C	p.Cys524Arg
chrB2	153430219	A	G	PASS	missense_variant	MODERATE	FRMD1	101081897	transcript	XM_019831640.2	protein_coding	12	c.1210T>C	p.Cys404Arg
chrB2	153430219	A	G	PASS	missense_variant	MODERATE	FRMD1	101081897	transcript	XM_023254602.1	protein_coding	10	c.1048T>C	p.Cys350Arg
chrB2	153430219	A	G	PASS	missense_variant	MODERATE	FRMD1	101081897	transcript	XM_023254600.1	protein_coding	12	c.1219T>C	p.Cys407Arg
chrB2	153430219	A	G	PASS	missense_variant	MODERATE	FRMD1	101081897	transcript	XM_023254601.1	protein_coding	11	c.1219T>C	p.Cys407Arg
chrB2	153430315	T	C	PASS	missense_variant	MODERATE	FRMD1	101081897	transcript	XM_023254596.1	protein_coding	9	c.1483A>G	p.Ser495Gly
chrB2	153430315	T	C	PASS	missense_variant	MODERATE	FRMD1	101081897	transcript	XM_023254597.1	protein_coding	9	c.1483A>G	p.Ser495Gly
chrB2	153430315	T	C	PASS	missense_variant	MODERATE	FRMD1	101081897	transcript	XM_023254598.1	protein_coding	9	c.1483A>G	p.Ser495Gly
chrB2	153430315	T	C	PASS	missense_variant	MODERATE	FRMD1	101081897	transcript	XM_023254599.1	protein_coding	9	c.1474A>G	p.Ser492Gly
chrB2	153430315	T	C	PASS	missense_variant	MODERATE	FRMD1	101081897	transcript	XM_019831640.2	protein_coding	12	c.1114A>G	p.Ser372Gly
chrB2	153430315	T	C	PASS	missense_variant	MODERATE	FRMD1	101081897	transcript	XM_023254602.1	protein_coding	10	c.952A>G	p.Ser318Gly
chrB2	153430315	T	C	PASS	missense_variant	MODERATE	FRMD1	101081897	transcript	XM_023254600.1	protein_coding	12	c.1123A>G	p.Ser375Gly
chrB2	153430315	T	C	PASS	missense_variant	MODERATE	FRMD1	101081897	transcript	XM_023254601.1	protein_coding	11	c.1123A>G	p.Ser375Gly
chrB2	153432264	C	T	PASS	missense_variant&splice_region_variant	MODERATE	FRMD1	101081897	transcript	XM_023254596.1	protein_coding	6	c.1027G>A	p.Asp343Asn
chrB2	153432264	C	T	PASS	missense_variant&splice_region_variant	MODERATE	FRMD1	101081897	transcript	XM_023254597.1	protein_coding	6	c.1027G>A	p.Asp343Asn
chrB2	153432264	C	T	PASS	missense_variant&splice_region_variant	MODERATE	FRMD1	101081897	transcript	XM_023254598.1	protein_coding	6	c.1027G>A	p.Asp343Asn
chrB2	153432264	C	T	PASS	missense_variant&splice_region_variant	MODERATE	FRMD1	101081897	transcript	XM_023254599.1	protein_coding	6	c.1018G>A	p.Asp340Asn
chrB2	153432264	C	T	PASS	missense_variant&splice_region_variant	MODERATE	FRMD1	101081897	transcript	XM_019831640.2	protein_coding	9	c.658G>A	p.Asp220Asn
chrB2	153432264	C	T	PASS	missense_variant&splice_region_variant	MODERATE	FRMD1	101081897	transcript	XM_023254602.1	protein_coding	7	c.496G>A	p.Asp166Asn
chrB2	153432264	C	T	PASS	missense_variant&splice_region_variant	MODERATE	FRMD1	101081897	transcript	XM_023254600.1	protein_coding	9	c.667G>A	p.Asp223Asn
chrB2	153432264	C	T	PASS	missense_variant&splice_region_variant	MODERATE	FRMD1	101081897	transcript	XM_023254601.1	protein_coding	8	c.667G>A	p.Asp223Asn
chrB2	153432606	C	T	PASS	missense_variant	MODERATE	FRMD1	101081897	transcript	XM_023254596.1	protein_coding	5	c.1021G>A	p.Asp341Asn
chrB2	153432606	C	T	PASS	missense_variant	MODERATE	FRMD1	101081897	transcript	XM_023254597.1	protein_coding	5	c.1021G>A	p.Asp341Asn
chrB2	153432606	C	T	PASS	missense_variant	MODERATE	FRMD1	101081897	transcript	XM_023254598.1	protein_coding	5	c.1021G>A	p.Asp341Asn
chrB2	153432606	C	T	PASS	missense_variant	MODERATE	FRMD1	101081897	transcript	XM_023254602.1	protein_coding	6	c.490G>A	p.Asp164Asn
chrB2	153432606	C	T	PASS	missense_variant	MODERATE	FRMD1	101081897	transcript	XM_023254600.1	protein_coding	8	c.661G>A	p.Asp221Asn
chrB2	153432606	C	T	PASS	missense_variant	MODERATE	FRMD1	101081897	transcript	XM_023254601.1	protein_coding	7	c.661G>A	p.Asp221Asn
chrB2	153433087	G	C	PASS	missense_variant	MODERATE	FRMD1	101081897	transcript	XM_023254596.1	protein_coding	4	c.683C>G	p.Thr228Arg
chrB2	153433087	G	C	PASS	missense_variant	MODERATE	FRMD1	101081897	transcript	XM_023254597.1	protein_coding	4	c.683C>G	p.Thr228Arg
chrB2	153433087	G	C	PASS	missense_variant	MODERATE	FRMD1	101081897	transcript	XM_023254598.1	protein_coding	4	c.683C>G	p.Thr228Arg
chrB2	153433087	G	C	PASS	missense_variant	MODERATE	FRMD1	101081897	transcript	XM_023254599.1	protein_coding	4	c.683C>G	p.Thr228Arg
chrB2	153433087	G	C	PASS	missense_variant	MODERATE	FRMD1	101081897	transcript	XM_019831640.2	protein_coding	7	c.323C>G	p.Thr108Arg
chrB2	153433087	G	C	PASS	missense_variant	MODERATE	FRMD1	101081897	transcript	XM_023254602.1	protein_coding	5	c.152C>G	p.Thr51Arg
chrB2	153433087	G	C	PASS	missense_variant	MODERATE	FRMD1	101081897	transcript	XM_023254600.1	protein_coding	7	c.323C>G	p.Thr108Arg
chrB2	153433087	G	C	PASS	missense_variant	MODERATE	FRMD1	101081897	transcript	XM_023254601.1	protein_coding	6	c.323C>G	p.Thr108Arg
chrB2	153434495	CCTT	C	PASS	disruptive_inframe_deletion	MODERATE	FRMD1	101081897	transcript	XM_023254596.1	protein_coding	1	c.515_517delAAG	p.Glu172del
chrB2	153434495	CCTT	C	PASS	disruptive_inframe_deletion	MODERATE	FRMD1	101081897	transcript	XM_023254597.1	protein_coding	1	c.515_517delAAG	p.Glu172del
chrB2	153434495	CCTT	C	PASS	disruptive_inframe_deletion	MODERATE	FRMD1	101081897	transcript	XM_023254598.1	protein_coding	1	c.515_517delAAG	p.Glu172del
chrB2	153434495	CCTT	C	PASS	disruptive_inframe_deletion	MODERATE	FRMD1	101081897	transcript	XM_023254599.1	protein_coding	1	c.515_517delAAG	p.Glu172del
chrB2	153434525	T	C	PASS	missense_variant	MODERATE	FRMD1	101081897	transcript	XM_023254596.1	protein_coding	1	c.488A>G	p.Glu163Gly
chrB2	153434525	T	C	PASS	missense_variant	MODERATE	FRMD1	101081897	transcript	XM_023254597.1	protein_coding	1	c.488A>G	p.Glu163Gly
chrB2	153434525	T	C	PASS	missense_variant	MODERATE	FRMD1	101081897	transcript	XM_023254598.1	protein_coding	1	c.488A>G	p.Glu163Gly
chrB2	153434525	T	C	PASS	missense_variant	MODERATE	FRMD1	101081897	transcript	XM_023254599.1	protein_coding	1	c.488A>G	p.Glu163Gly
chrB2	153434604	A	G	PASS	missense_variant	MODERATE	FRMD1	101081897	transcript	XM_023254596.1	protein_coding	1	c.409T>C	p.Cys137Arg
chrB2	153434604	A	G	PASS	missense_variant	MODERATE	FRMD1	101081897	transcript	XM_023254597.1	protein_coding	1	c.409T>C	p.Cys137Arg
chrB2	153434604	A	G	PASS	missense_variant	MODERATE	FRMD1	101081897	transcript	XM_023254598.1	protein_coding	1	c.409T>C	p.Cys137Arg
chrB2	153434604	A	G	PASS	missense_variant	MODERATE	FRMD1	101081897	transcript	XM_023254599.1	protein_coding	1	c.409T>C	p.Cys137Arg
chrB2	153434648	T	C	PASS	missense_variant	MODERATE	FRMD1	101081897	transcript	XM_023254596.1	protein_coding	1	c.365A>G	p.Gln122Arg
chrB2	153434648	T	C	PASS	missense_variant	MODERATE	FRMD1	101081897	transcript	XM_023254597.1	protein_coding	1	c.365A>G	p.Gln122Arg
chrB2	153434648	T	C	PASS	missense_variant	MODERATE	FRMD1	101081897	transcript	XM_023254598.1	protein_coding	1	c.365A>G	p.Gln122Arg
chrB2	153434648	T	C	PASS	missense_variant	MODERATE	FRMD1	101081897	transcript	XM_023254599.1	protein_coding	1	c.365A>G	p.Gln122Arg
chrB2	153434654	C	T	PASS	missense_variant	MODERATE	FRMD1	101081897	transcript	XM_023254596.1	protein_coding	1	c.359G>A	p.Gly120Glu
chrB2	153434654	C	T	PASS	missense_variant	MODERATE	FRMD1	101081897	transcript	XM_023254597.1	protein_coding	1	c.359G>A	p.Gly120Glu
chrB2	153434654	C	T	PASS	missense_variant	MODERATE	FRMD1	101081897	transcript	XM_023254598.1	protein_coding	1	c.359G>A	p.Gly120Glu
chrB2	153434654	C	T	PASS	missense_variant	MODERATE	FRMD1	101081897	transcript	XM_023254599.1	protein_coding	1	c.359G>A	p.Gly120Glu
chrB2	153434757	A	T	PASS	missense_variant	MODERATE	FRMD1	101081897	transcript	XM_023254596.1	protein_coding	1	c.256T>A	p.Leu86Ile
chrB2	153434757	A	T	PASS	missense_variant	MODERATE	FRMD1	101081897	transcript	XM_023254597.1	protein_coding	1	c.256T>A	p.Leu86Ile
chrB2	153434757	A	T	PASS	missense_variant	MODERATE	FRMD1	101081897	transcript	XM_023254598.1	protein_coding	1	c.256T>A	p.Leu86Ile
chrB2	153434757	A	T	PASS	missense_variant	MODERATE	FRMD1	101081897	transcript	XM_023254599.1	protein_coding	1	c.256T>A	p.Leu86Ile
chrB2	153434780	T	C	PASS	missense_variant	MODERATE	FRMD1	101081897	transcript	XM_023254596.1	protein_coding	1	c.233A>G	p.Tyr78Cys
chrB2	153434780	T	C	PASS	missense_variant	MODERATE	FRMD1	101081897	transcript	XM_023254597.1	protein_coding	1	c.233A>G	p.Tyr78Cys
chrB2	153434780	T	C	PASS	missense_variant	MODERATE	FRMD1	101081897	transcript	XM_023254598.1	protein_coding	1	c.233A>G	p.Tyr78Cys
chrB2	153434780	T	C	PASS	missense_variant	MODERATE	FRMD1	101081897	transcript	XM_023254599.1	protein_coding	1	c.233A>G	p.Tyr78Cys
chrB2	153434782	G	C	PASS	missense_variant	MODERATE	FRMD1	101081897	transcript	XM_023254596.1	protein_coding	1	c.231C>G	p.His77Gln
chrB2	153434782	G	C	PASS	missense_variant	MODERATE	FRMD1	101081897	transcript	XM_023254597.1	protein_coding	1	c.231C>G	p.His77Gln
chrB2	153434782	G	C	PASS	missense_variant	MODERATE	FRMD1	101081897	transcript	XM_023254598.1	protein_coding	1	c.231C>G	p.His77Gln
chrB2	153434782	G	C	PASS	missense_variant	MODERATE	FRMD1	101081897	transcript	XM_023254599.1	protein_coding	1	c.231C>G	p.His77Gln
chrB2	153434792	GT	G	PASS	frameshift_variant	HIGH	FRMD1	101081897	transcript	XM_023254596.1	protein_coding	1	c.220delA	p.Thr74fs
chrB2	153434792	GT	G	PASS	frameshift_variant	HIGH	FRMD1	101081897	transcript	XM_023254597.1	protein_coding	1	c.220delA	p.Thr74fs
chrB2	153434792	GT	G	PASS	frameshift_variant	HIGH	FRMD1	101081897	transcript	XM_023254598.1	protein_coding	1	c.220delA	p.Thr74fs
chrB2	153434792	GT	G	PASS	frameshift_variant	HIGH	FRMD1	101081897	transcript	XM_023254599.1	protein_coding	1	c.220delA	p.Thr74fs
chrB2	153434814	C	A	PASS	missense_variant	MODERATE	FRMD1	101081897	transcript	XM_023254596.1	protein_coding	1	c.199G>T	p.Gly67Cys
chrB2	153434814	C	A	PASS	missense_variant	MODERATE	FRMD1	101081897	transcript	XM_023254597.1	protein_coding	1	c.199G>T	p.Gly67Cys
chrB2	153434814	C	A	PASS	missense_variant	MODERATE	FRMD1	101081897	transcript	XM_023254598.1	protein_coding	1	c.199G>T	p.Gly67Cys
chrB2	153434814	C	A	PASS	missense_variant	MODERATE	FRMD1	101081897	transcript	XM_023254599.1	protein_coding	1	c.199G>T	p.Gly67Cys
chrB2	153434924	C	T	PASS	missense_variant	MODERATE	FRMD1	101081897	transcript	XM_023254596.1	protein_coding	1	c.89G>A	p.Gly30Asp
chrB2	153434924	C	T	PASS	missense_variant	MODERATE	FRMD1	101081897	transcript	XM_023254597.1	protein_coding	1	c.89G>A	p.Gly30Asp
chrB2	153434924	C	T	PASS	missense_variant	MODERATE	FRMD1	101081897	transcript	XM_023254598.1	protein_coding	1	c.89G>A	p.Gly30Asp
chrB2	153434924	C	T	PASS	missense_variant	MODERATE	FRMD1	101081897	transcript	XM_023254599.1	protein_coding	1	c.89G>A	p.Gly30Asp
chrB2	153434943	A	G	PASS	missense_variant	MODERATE	FRMD1	101081897	transcript	XM_023254596.1	protein_coding	1	c.70T>C	p.Tyr24His
chrB2	153434943	A	G	PASS	missense_variant	MODERATE	FRMD1	101081897	transcript	XM_023254597.1	protein_coding	1	c.70T>C	p.Tyr24His
chrB2	153434943	A	G	PASS	missense_variant	MODERATE	FRMD1	101081897	transcript	XM_023254598.1	protein_coding	1	c.70T>C	p.Tyr24His
chrB2	153434943	A	G	PASS	missense_variant	MODERATE	FRMD1	101081897	transcript	XM_023254599.1	protein_coding	1	c.70T>C	p.Tyr24His
chrB2	153434978	G	A	PASS	missense_variant	MODERATE	FRMD1	101081897	transcript	XM_023254596.1	protein_coding	1	c.35C>T	p.Thr12Ile
chrB2	153434978	G	A	PASS	missense_variant	MODERATE	FRMD1	101081897	transcript	XM_023254597.1	protein_coding	1	c.35C>T	p.Thr12Ile
chrB2	153434978	G	A	PASS	missense_variant	MODERATE	FRMD1	101081897	transcript	XM_023254598.1	protein_coding	1	c.35C>T	p.Thr12Ile
chrB2	153434978	G	A	PASS	missense_variant	MODERATE	FRMD1	101081897	transcript	XM_023254599.1	protein_coding	1	c.35C>T	p.Thr12Ile
chrB2	153437720	G	A	PASS	missense_variant	MODERATE	FRMD1	101081897	transcript	XM_023254603.1	protein_coding	3	c.1238C>T	p.Ser413Phe
chrB2	153437859	C	T	PASS	missense_variant	MODERATE	FRMD1	101081897	transcript	XM_023254603.1	protein_coding	3	c.1099G>A	p.Ala367Thr
chrB2	153437925	C	T	PASS	missense_variant	MODERATE	FRMD1	101081897	transcript	XM_023254603.1	protein_coding	3	c.1033G>A	p.Val345Met
chrB2	153437972	G	C	PASS	missense_variant	MODERATE	FRMD1	101081897	transcript	XM_023254603.1	protein_coding	3	c.986C>G	p.Pro329Arg
chrB2	153438137	G	A	PASS	missense_variant	MODERATE	FRMD1	101081897	transcript	XM_023254603.1	protein_coding	3	c.821C>T	p.Ala274Val
chrB2	153438175	C	A	PASS	missense_variant	MODERATE	FRMD1	101081897	transcript	XM_023254603.1	protein_coding	3	c.783G>T	p.Lys261Asn
chrB2	153438557	G	A	PASS	missense_variant	MODERATE	FRMD1	101081897	transcript	XM_023254603.1	protein_coding	3	c.401C>T	p.Pro134Leu
chrB2	153438665	C	T	PASS	missense_variant	MODERATE	FRMD1	101081897	transcript	XM_023254603.1	protein_coding	3	c.293G>A	p.Arg98His
chrB2	153438675	A	G	PASS	missense_variant	MODERATE	FRMD1	101081897	transcript	XM_023254603.1	protein_coding	3	c.283T>C	p.Cys95Arg
chrB2	153438819	GA	G	PASS	frameshift_variant	HIGH	FRMD1	101081897	transcript	XM_023254603.1	protein_coding	3	c.138delT	p.His47fs
chrB2	153567690	A	C	PASS	missense_variant	MODERATE	LOC111560556	111560556	transcript	XM_023254604.1	protein_coding	1	c.937T>G	p.Trp313Gly
chrB2	153567705	G	A	PASS	missense_variant	MODERATE	LOC111560556	111560556	transcript	XM_023254604.1	protein_coding	1	c.922C>T	p.Arg308Trp
chrB2	153567757	C	CAG	PASS	frameshift_variant	HIGH	LOC111560556	111560556	transcript	XM_023254604.1	protein_coding	1	c.868_869dupCT	p.Val291fs
chrB2	153567821	A	G	PASS	missense_variant	MODERATE	LOC111560556	111560556	transcript	XM_023254604.1	protein_coding	1	c.806T>C	p.Leu269Pro
chrB2	153567887	A	C	PASS	missense_variant	MODERATE	LOC111560556	111560556	transcript	XM_023254604.1	protein_coding	1	c.740T>G	p.Val247Gly
chrB2	153567901	AG	A	PASS	frameshift_variant	HIGH	LOC111560556	111560556	transcript	XM_023254604.1	protein_coding	1	c.725delC	p.Ala242fs
chrB2	153567912	G	C	PASS	missense_variant	MODERATE	LOC111560556	111560556	transcript	XM_023254604.1	protein_coding	1	c.715C>G	p.Leu239Val
chrB2	153567969	C	G	PASS	missense_variant	MODERATE	LOC111560556	111560556	transcript	XM_023254604.1	protein_coding	1	c.658G>C	p.Asp220His
chrB2	153568021	C	CCTCCAGCTCACTGCAGGACGAGCCTCCG	PASS	frameshift_variant	HIGH	LOC111560556	111560556	transcript	XM_023254604.1	protein_coding	1	c.605_606insCGGAGGCTCGTCCTGCAGTGAGCTGGAG	p.Arg202fs
chrB2	153568083	G	C	PASS	missense_variant	MODERATE	LOC111560556	111560556	transcript	XM_023254604.1	protein_coding	1	c.544C>G	p.Leu182Val
chrB2	153568136	G	GCCCCCCC,GC	PASS	frameshift_variant	HIGH	LOC111560556	111560556	transcript	XM_023254604.1	protein_coding	1	c.490dupG	p.Ala164fs
chrB2	153568136	G	GCCCCCCC,GC	PASS	frameshift_variant	HIGH	LOC111560556	111560556	transcript	XM_023254604.1	protein_coding	1	c.484_490dupGGGGGGG	p.Ala164fs
chrB2	153568163	G	T	PASS	missense_variant	MODERATE	LOC111560556	111560556	transcript	XM_023254604.1	protein_coding	1	c.464C>A	p.Pro155His
chrB2	153568226	TGACTC	T	PASS	frameshift_variant	HIGH	LOC111560556	111560556	transcript	XM_023254604.1	protein_coding	1	c.396_400delGAGTC	p.Ser133fs
chrB2	153568256	A	C	PASS	missense_variant	MODERATE	LOC111560556	111560556	transcript	XM_023254604.1	protein_coding	1	c.371T>G	p.Leu124Arg
chrB2	153568266	A	ACGAGTGTCCGATCGC	PASS	conservative_inframe_insertion	MODERATE	LOC111560556	111560556	transcript	XM_023254604.1	protein_coding	1	c.360_361insGCGATCGGACACTCG	p.Ser120_Ser121insAlaIleGlyHisSer
chrB2	153568273	T	G	PASS	missense_variant	MODERATE	LOC111560556	111560556	transcript	XM_023254604.1	protein_coding	1	c.354A>C	p.Gln118His
chrB2	153568364	G	A	PASS	missense_variant	MODERATE	LOC111560556	111560556	transcript	XM_023254604.1	protein_coding	1	c.263C>T	p.Thr88Met
chrB2	153568464	CT	C	PASS	frameshift_variant	HIGH	LOC111560556	111560556	transcript	XM_023254604.1	protein_coding	1	c.162delA	p.Gly55fs
chrB2	153568469	C	T	PASS	missense_variant	MODERATE	LOC111560556	111560556	transcript	XM_023254604.1	protein_coding	1	c.158G>A	p.Arg53His
chrB2	153568520	C	CTG	PASS	frameshift_variant	HIGH	LOC111560556	111560556	transcript	XM_023254604.1	protein_coding	1	c.106_107insCA	p.Gly36fs
chrB2	153568577	A	T	PASS	stop_gained	HIGH	LOC111560556	111560556	transcript	XM_023254604.1	protein_coding	1	c.50T>A	p.Leu17*
chrB2	153568604	A	C	PASS	missense_variant	MODERATE	LOC111560556	111560556	transcript	XM_023254604.1	protein_coding	1	c.23T>G	p.Leu8Arg
chrB2	153569425	T	A	PASS	missense_variant	MODERATE	DACT2	101082157	transcript	XM_023254605.1	protein_coding	4	c.1969A>T	p.Arg657Trp
chrB2	153569425	T	A	PASS	missense_variant	MODERATE	DACT2	101082157	transcript	XM_023254608.1	protein_coding	4	c.1750A>T	p.Arg584Trp
chrB2	153569425	T	A	PASS	missense_variant	MODERATE	DACT2	101082157	transcript	XM_023254607.1	protein_coding	4	c.1843A>T	p.Arg615Trp
chrB2	153569425	T	A	PASS	missense_variant	MODERATE	DACT2	101082157	transcript	XM_023254606.1	protein_coding	5	c.1924A>T	p.Arg642Trp
chrB2	153569884	C	T	PASS	missense_variant	MODERATE	DACT2	101082157	transcript	XM_023254605.1	protein_coding	4	c.1510G>A	p.Ala504Thr
chrB2	153569884	C	T	PASS	missense_variant	MODERATE	DACT2	101082157	transcript	XM_023254608.1	protein_coding	4	c.1291G>A	p.Ala431Thr
chrB2	153569884	C	T	PASS	missense_variant	MODERATE	DACT2	101082157	transcript	XM_023254607.1	protein_coding	4	c.1384G>A	p.Ala462Thr
chrB2	153569884	C	T	PASS	missense_variant	MODERATE	DACT2	101082157	transcript	XM_023254606.1	protein_coding	5	c.1465G>A	p.Ala489Thr
chrB2	153569950	C	T	PASS	missense_variant	MODERATE	DACT2	101082157	transcript	XM_023254605.1	protein_coding	4	c.1444G>A	p.Ala482Thr
chrB2	153569950	C	T	PASS	missense_variant	MODERATE	DACT2	101082157	transcript	XM_023254608.1	protein_coding	4	c.1225G>A	p.Ala409Thr
chrB2	153569950	C	T	PASS	missense_variant	MODERATE	DACT2	101082157	transcript	XM_023254607.1	protein_coding	4	c.1318G>A	p.Ala440Thr
chrB2	153569950	C	T	PASS	missense_variant	MODERATE	DACT2	101082157	transcript	XM_023254606.1	protein_coding	5	c.1399G>A	p.Ala467Thr
chrB2	153570163	C	T	PASS	missense_variant	MODERATE	DACT2	101082157	transcript	XM_023254605.1	protein_coding	4	c.1231G>A	p.Ala411Thr
chrB2	153570163	C	T	PASS	missense_variant	MODERATE	DACT2	101082157	transcript	XM_023254608.1	protein_coding	4	c.1012G>A	p.Ala338Thr
chrB2	153570163	C	T	PASS	missense_variant	MODERATE	DACT2	101082157	transcript	XM_023254607.1	protein_coding	4	c.1105G>A	p.Ala369Thr
chrB2	153570163	C	T	PASS	missense_variant	MODERATE	DACT2	101082157	transcript	XM_023254606.1	protein_coding	5	c.1186G>A	p.Ala396Thr
chrB2	153570277	T	C	PASS	missense_variant	MODERATE	DACT2	101082157	transcript	XM_023254605.1	protein_coding	4	c.1117A>G	p.Ser373Gly
chrB2	153570277	T	C	PASS	missense_variant	MODERATE	DACT2	101082157	transcript	XM_023254608.1	protein_coding	4	c.898A>G	p.Ser300Gly
chrB2	153570277	T	C	PASS	missense_variant	MODERATE	DACT2	101082157	transcript	XM_023254607.1	protein_coding	4	c.991A>G	p.Ser331Gly
chrB2	153570277	T	C	PASS	missense_variant	MODERATE	DACT2	101082157	transcript	XM_023254606.1	protein_coding	5	c.1072A>G	p.Ser358Gly
chrB2	153570405	G	A	PASS	missense_variant	MODERATE	DACT2	101082157	transcript	XM_023254605.1	protein_coding	4	c.989C>T	p.Pro330Leu
chrB2	153570405	G	A	PASS	missense_variant	MODERATE	DACT2	101082157	transcript	XM_023254608.1	protein_coding	4	c.770C>T	p.Pro257Leu
chrB2	153570405	G	A	PASS	missense_variant	MODERATE	DACT2	101082157	transcript	XM_023254607.1	protein_coding	4	c.863C>T	p.Pro288Leu
chrB2	153570405	G	A	PASS	missense_variant	MODERATE	DACT2	101082157	transcript	XM_023254606.1	protein_coding	5	c.944C>T	p.Pro315Leu
chrB2	153570757	C	T	PASS	missense_variant	MODERATE	DACT2	101082157	transcript	XM_023254605.1	protein_coding	4	c.637G>A	p.Ala213Thr
chrB2	153570757	C	T	PASS	missense_variant	MODERATE	DACT2	101082157	transcript	XM_023254608.1	protein_coding	4	c.418G>A	p.Ala140Thr
chrB2	153570757	C	T	PASS	missense_variant	MODERATE	DACT2	101082157	transcript	XM_023254607.1	protein_coding	4	c.511G>A	p.Ala171Thr
chrB2	153570757	C	T	PASS	missense_variant	MODERATE	DACT2	101082157	transcript	XM_023254606.1	protein_coding	5	c.592G>A	p.Ala198Thr
chrB2	153571697	A	G	PASS	missense_variant	MODERATE	DACT2	101082157	transcript	XM_023254605.1	protein_coding	3	c.523T>C	p.Ser175Pro
chrB2	153571697	A	G	PASS	missense_variant	MODERATE	DACT2	101082157	transcript	XM_023254608.1	protein_coding	3	c.304T>C	p.Ser102Pro
chrB2	153571697	A	G	PASS	missense_variant	MODERATE	DACT2	101082157	transcript	XM_023254607.1	protein_coding	3	c.397T>C	p.Ser133Pro
chrB2	153571697	A	G	PASS	missense_variant	MODERATE	DACT2	101082157	transcript	XM_023254606.1	protein_coding	4	c.478T>C	p.Ser160Pro
chrB2	153572806	G	A	PASS	missense_variant	MODERATE	DACT2	101082157	transcript	XM_023254605.1	protein_coding	2	c.304C>T	p.Arg102Cys
chrB2	153572806	G	A	PASS	missense_variant	MODERATE	DACT2	101082157	transcript	XM_023254608.1	protein_coding	2	c.85C>T	p.Arg29Cys
chrB2	153572806	G	A	PASS	missense_variant	MODERATE	DACT2	101082157	transcript	XM_023254607.1	protein_coding	2	c.178C>T	p.Arg60Cys
chrB2	153572806	G	A	PASS	missense_variant	MODERATE	DACT2	101082157	transcript	XM_023254606.1	protein_coding	3	c.259C>T	p.Arg87Cys
chrB2	153574502	CCAAAGGGAA	C	PASS	stop_gained&disruptive_inframe_deletion	HIGH	DACT2	101082157	transcript	XM_023254608.1	protein_coding	1	c.5_13delTTCCCTTTG	p.Phe2_Gly5delinsTer
chrB2	153574513	C	CCTTG	PASS	frameshift_variant&start_lost	HIGH	DACT2	101082157	transcript	XM_023254608.1	protein_coding	1	c.2_3insCAAG	p.Met1fs
chrB2	153575160	G	A	PASS	missense_variant	MODERATE	DACT2	101082157	transcript	XM_023254607.1	protein_coding	1	c.43C>T	p.Arg15Trp
chrB2	153575574	C	T	PASS	missense_variant	MODERATE	DACT2	101082157	transcript	XM_023254606.1	protein_coding	2	c.85G>A	p.Val29Ile
chrB2	153752759	A	G	PASS	splice_donor_variant&intron_variant	HIGH	LOC109500055	109500055	transcript	XR_002157709.2	pseudogene	1	n.2657+2T>C
chrB2	153821969	A	G	PASS	missense_variant	MODERATE	SMOC2	101082409	transcript	XM_023254609.1	protein_coding	11	c.1301A>G	p.Lys434Arg
chrB2	153821969	A	G	PASS	missense_variant	MODERATE	SMOC2	101082409	transcript	XM_023254613.1	protein_coding	8	c.1094A>G	p.Lys365Arg
chrB2	153821969	A	G	PASS	missense_variant	MODERATE	SMOC2	101082409	transcript	XM_023254611.1	protein_coding	11	c.1268A>G	p.Lys423Arg
chrB2	154170607	T	C	PASS	splice_acceptor_variant&intron_variant	HIGH	LOC109500057	109500057	transcript	XR_002157711.2	pseudogene	1	n.463-2A>G
chrB2	154200623	T	C	PASS	missense_variant	MODERATE	THBS2	101100567	transcript	XM_006932146.4	protein_coding	20	c.3304A>G	p.Ile1102Val
chrB2	154200623	T	C	PASS	missense_variant	MODERATE	THBS2	101100567	transcript	XM_006932147.4	protein_coding	20	c.3304A>G	p.Ile1102Val
chrB2	154200623	T	C	PASS	missense_variant	MODERATE	THBS2	101100567	transcript	XM_019831507.2	protein_coding	20	c.3304A>G	p.Ile1102Val
chrB2	154208321	C	T	PASS	missense_variant	MODERATE	THBS2	101100567	transcript	XM_006932146.4	protein_coding	12	c.1807G>A	p.Ala603Thr
chrB2	154208321	C	T	PASS	missense_variant	MODERATE	THBS2	101100567	transcript	XM_006932147.4	protein_coding	12	c.1807G>A	p.Ala603Thr
chrB2	154208321	C	T	PASS	missense_variant	MODERATE	THBS2	101100567	transcript	XM_019831507.2	protein_coding	12	c.1807G>A	p.Ala603Thr
chrB2	154210552	A	G	PASS	missense_variant	MODERATE	THBS2	101100567	transcript	XM_006932146.4	protein_coding	8	c.1133T>C	p.Leu378Pro
chrB2	154210552	A	G	PASS	missense_variant	MODERATE	THBS2	101100567	transcript	XM_006932147.4	protein_coding	8	c.1133T>C	p.Leu378Pro
chrB2	154210552	A	G	PASS	missense_variant	MODERATE	THBS2	101100567	transcript	XM_019831507.2	protein_coding	8	c.1133T>C	p.Leu378Pro
chrB2	154346796	C	T	PASS	missense_variant	MODERATE	WDR27	101082660	transcript	XM_019831511.2	protein_coding	26	c.2669G>A	p.Arg890His
chrB2	154369809	G	A	PASS	missense_variant	MODERATE	WDR27	101082660	transcript	XM_019831508.2	protein_coding	27	c.2957C>T	p.Thr986Met
chrB2	154369809	G	A	PASS	missense_variant	MODERATE	WDR27	101082660	transcript	XM_023254615.1	protein_coding	26	c.2801C>T	p.Thr934Met
chrB2	154369809	G	A	PASS	missense_variant	MODERATE	WDR27	101082660	transcript	XM_019831510.2	protein_coding	26	c.2801C>T	p.Thr934Met
chrB2	154369816	A	G	PASS	missense_variant	MODERATE	WDR27	101082660	transcript	XM_019831508.2	protein_coding	27	c.2950T>C	p.Cys984Arg
chrB2	154369816	A	G	PASS	missense_variant	MODERATE	WDR27	101082660	transcript	XM_023254615.1	protein_coding	26	c.2794T>C	p.Cys932Arg
chrB2	154369816	A	G	PASS	missense_variant	MODERATE	WDR27	101082660	transcript	XM_019831510.2	protein_coding	26	c.2794T>C	p.Cys932Arg
chrB2	154369900	G	A	PASS	missense_variant	MODERATE	WDR27	101082660	transcript	XM_019831508.2	protein_coding	27	c.2866C>T	p.Pro956Ser
chrB2	154369900	G	A	PASS	missense_variant	MODERATE	WDR27	101082660	transcript	XM_023254615.1	protein_coding	26	c.2710C>T	p.Pro904Ser
chrB2	154369900	G	A	PASS	missense_variant	MODERATE	WDR27	101082660	transcript	XM_019831510.2	protein_coding	26	c.2710C>T	p.Pro904Ser
chrB2	154371896	T	G	PASS	missense_variant	MODERATE	LOC111560558	111560558	transcript	XM_023254622.1	protein_coding	2	c.888A>C	p.Glu296Asp
chrB2	154372080	C	CCA	PASS	frameshift_variant	HIGH	LOC111560558	111560558	transcript	XM_023254622.1	protein_coding	2	c.703_704insTG	p.Gly235fs
chrB2	154372158	A	G	PASS	missense_variant	MODERATE	LOC111560558	111560558	transcript	XM_023254622.1	protein_coding	2	c.626T>C	p.Val209Ala
chrB2	154372276	G	A	PASS	stop_gained	HIGH	LOC111560558	111560558	transcript	XM_023254622.1	protein_coding	2	c.508C>T	p.Gln170*
chrB2	154372336	T	A	PASS	missense_variant	MODERATE	LOC111560558	111560558	transcript	XM_023254622.1	protein_coding	2	c.448A>T	p.Thr150Ser
chrB2	154372387	T	C	PASS	missense_variant	MODERATE	LOC111560558	111560558	transcript	XM_023254622.1	protein_coding	2	c.397A>G	p.Lys133Glu
chrB2	154372404	T	C	PASS	missense_variant	MODERATE	LOC111560558	111560558	transcript	XM_023254622.1	protein_coding	2	c.380A>G	p.Gln127Arg
chrB2	154372464	T	C	PASS	missense_variant	MODERATE	LOC111560558	111560558	transcript	XM_023254622.1	protein_coding	2	c.320A>G	p.His107Arg
chrB2	154372539	A	G	PASS	missense_variant	MODERATE	LOC111560558	111560558	transcript	XM_023254622.1	protein_coding	2	c.245T>C	p.Val82Ala
chrB2	154372542	C	T	PASS	missense_variant	MODERATE	LOC111560558	111560558	transcript	XM_023254622.1	protein_coding	2	c.242G>A	p.Arg81Gln
chrB2	154372642	C	G	PASS	missense_variant	MODERATE	LOC111560558	111560558	transcript	XM_023254622.1	protein_coding	2	c.142G>C	p.Gly48Arg
chrB2	154372702	G	A	PASS	missense_variant	MODERATE	LOC111560558	111560558	transcript	XM_023254622.1	protein_coding	2	c.82C>T	p.Pro28Ser
chrB2	154375457	A	G	PASS	splice_donor_variant&intron_variant	HIGH	LOC111560558	111560558	transcript	XM_023254622.1	protein_coding	1	c.-2553+2T>C
chrB2	154383996	A	G	PASS	splice_donor_variant&intron_variant	HIGH	WDR27	101082660	transcript	XR_002157717.2	pseudogene	26	n.3514+2T>C
chrB2	154383996	A	G	PASS	splice_donor_variant&intron_variant	HIGH	WDR27	101082660	transcript	XR_002157718.2	pseudogene	25	n.3418+2T>C
chrB2	154445272	T	C	PASS	missense_variant	MODERATE	WDR27	101082660	transcript	XM_019831508.2	protein_coding	26	c.2614A>G	p.Asn872Asp
chrB2	154445272	T	C	PASS	missense_variant	MODERATE	WDR27	101082660	transcript	XM_023254615.1	protein_coding	25	c.2458A>G	p.Asn820Asp
chrB2	154445272	T	C	PASS	missense_variant	MODERATE	WDR27	101082660	transcript	XM_019831510.2	protein_coding	25	c.2458A>G	p.Asn820Asp
chrB2	154445486	G	A	PASS	missense_variant	MODERATE	WDR27	101082660	transcript	XM_019831508.2	protein_coding	25	c.2528C>T	p.Thr843Met
chrB2	154445486	G	A	PASS	missense_variant	MODERATE	WDR27	101082660	transcript	XM_019831511.2	protein_coding	25	c.2540C>T	p.Thr847Met
chrB2	154445486	G	A	PASS	missense_variant	MODERATE	WDR27	101082660	transcript	XM_023254615.1	protein_coding	24	c.2372C>T	p.Thr791Met
chrB2	154445486	G	A	PASS	missense_variant	MODERATE	WDR27	101082660	transcript	XM_019831510.2	protein_coding	24	c.2372C>T	p.Thr791Met
chrB2	154445486	G	A	PASS	missense_variant	MODERATE	WDR27	101082660	transcript	XM_019831517.2	protein_coding	25	c.2540C>T	p.Thr847Met
chrB2	154445486	G	A	PASS	missense_variant	MODERATE	WDR27	101082660	transcript	XM_019831519.2	protein_coding	25	c.2540C>T	p.Thr847Met
chrB2	154460461	C	T	PASS	missense_variant	MODERATE	WDR27	101082660	transcript	XM_019831508.2	protein_coding	23	c.2350G>A	p.Ala784Thr
chrB2	154460461	C	T	PASS	missense_variant	MODERATE	WDR27	101082660	transcript	XM_019831511.2	protein_coding	23	c.2362G>A	p.Ala788Thr
chrB2	154460461	C	T	PASS	missense_variant	MODERATE	WDR27	101082660	transcript	XM_023254615.1	protein_coding	22	c.2194G>A	p.Ala732Thr
chrB2	154460461	C	T	PASS	missense_variant	MODERATE	WDR27	101082660	transcript	XM_019831510.2	protein_coding	22	c.2194G>A	p.Ala732Thr
chrB2	154460461	C	T	PASS	missense_variant	MODERATE	WDR27	101082660	transcript	XM_019831517.2	protein_coding	23	c.2362G>A	p.Ala788Thr
chrB2	154460461	C	T	PASS	missense_variant	MODERATE	WDR27	101082660	transcript	XM_019831520.2	protein_coding	23	c.2362G>A	p.Ala788Thr
chrB2	154460461	C	T	PASS	missense_variant	MODERATE	WDR27	101082660	transcript	XM_019831519.2	protein_coding	23	c.2362G>A	p.Ala788Thr
chrB2	154470652	A	C	PASS	stop_lost	HIGH	WDR27	101082660	transcript	XM_019831522.2	protein_coding	23	c.2479T>G	p.Ter827Glyext*?
chrB2	154470708	T	G	PASS	missense_variant	MODERATE	WDR27	101082660	transcript	XM_019831522.2	protein_coding	23	c.2423A>C	p.Lys808Thr
chrB2	154470780	G	T	PASS	missense_variant	MODERATE	WDR27	101082660	transcript	XM_019831522.2	protein_coding	23	c.2351C>A	p.Pro784Gln
chrB2	154475743	C	T	PASS	missense_variant	MODERATE	WDR27	101082660	transcript	XM_019831508.2	protein_coding	22	c.2188G>A	p.Ala730Thr
chrB2	154475743	C	T	PASS	missense_variant	MODERATE	WDR27	101082660	transcript	XM_019831511.2	protein_coding	22	c.2200G>A	p.Ala734Thr
chrB2	154475743	C	T	PASS	missense_variant	MODERATE	WDR27	101082660	transcript	XM_023254615.1	protein_coding	21	c.2032G>A	p.Ala678Thr
chrB2	154475743	C	T	PASS	missense_variant	MODERATE	WDR27	101082660	transcript	XM_019831510.2	protein_coding	21	c.2032G>A	p.Ala678Thr
chrB2	154475743	C	T	PASS	missense_variant	MODERATE	WDR27	101082660	transcript	XM_019831517.2	protein_coding	22	c.2200G>A	p.Ala734Thr
chrB2	154475743	C	T	PASS	missense_variant	MODERATE	WDR27	101082660	transcript	XM_019831520.2	protein_coding	22	c.2200G>A	p.Ala734Thr
chrB2	154475743	C	T	PASS	missense_variant	MODERATE	WDR27	101082660	transcript	XM_019831519.2	protein_coding	22	c.2200G>A	p.Ala734Thr
chrB2	154475743	C	T	PASS	missense_variant	MODERATE	WDR27	101082660	transcript	XM_019831522.2	protein_coding	22	c.2200G>A	p.Ala734Thr
chrB2	154476867	G	A	PASS	missense_variant	MODERATE	WDR27	101082660	transcript	XM_019831508.2	protein_coding	21	c.2159C>T	p.Ala720Val
chrB2	154476867	G	A	PASS	missense_variant	MODERATE	WDR27	101082660	transcript	XM_019831511.2	protein_coding	21	c.2171C>T	p.Ala724Val
chrB2	154476867	G	A	PASS	missense_variant	MODERATE	WDR27	101082660	transcript	XM_023254615.1	protein_coding	20	c.2003C>T	p.Ala668Val
chrB2	154476867	G	A	PASS	missense_variant	MODERATE	WDR27	101082660	transcript	XM_019831510.2	protein_coding	20	c.2003C>T	p.Ala668Val
chrB2	154476867	G	A	PASS	missense_variant	MODERATE	WDR27	101082660	transcript	XM_019831517.2	protein_coding	21	c.2171C>T	p.Ala724Val
chrB2	154476867	G	A	PASS	missense_variant	MODERATE	WDR27	101082660	transcript	XM_019831520.2	protein_coding	21	c.2171C>T	p.Ala724Val
chrB2	154476867	G	A	PASS	missense_variant	MODERATE	WDR27	101082660	transcript	XM_019831519.2	protein_coding	21	c.2171C>T	p.Ala724Val
chrB2	154476867	G	A	PASS	missense_variant	MODERATE	WDR27	101082660	transcript	XM_019831522.2	protein_coding	21	c.2171C>T	p.Ala724Val
chrB2	154481500	T	C	PASS	missense_variant	MODERATE	WDR27	101082660	transcript	XM_019831508.2	protein_coding	20	c.2073A>G	p.Ile691Met
chrB2	154481500	T	C	PASS	missense_variant	MODERATE	WDR27	101082660	transcript	XM_019831511.2	protein_coding	20	c.2085A>G	p.Ile695Met
chrB2	154481500	T	C	PASS	missense_variant	MODERATE	WDR27	101082660	transcript	XM_023254615.1	protein_coding	19	c.1917A>G	p.Ile639Met
chrB2	154481500	T	C	PASS	missense_variant	MODERATE	WDR27	101082660	transcript	XM_019831510.2	protein_coding	19	c.1917A>G	p.Ile639Met
chrB2	154481500	T	C	PASS	missense_variant	MODERATE	WDR27	101082660	transcript	XM_019831517.2	protein_coding	20	c.2085A>G	p.Ile695Met
chrB2	154481500	T	C	PASS	missense_variant	MODERATE	WDR27	101082660	transcript	XM_019831520.2	protein_coding	20	c.2085A>G	p.Ile695Met
chrB2	154481500	T	C	PASS	missense_variant	MODERATE	WDR27	101082660	transcript	XM_019831519.2	protein_coding	20	c.2085A>G	p.Ile695Met
chrB2	154481500	T	C	PASS	missense_variant	MODERATE	WDR27	101082660	transcript	XM_019831522.2	protein_coding	20	c.2085A>G	p.Ile695Met
chrB2	154486870	A	G	PASS	missense_variant	MODERATE	WDR27	101082660	transcript	XM_019831508.2	protein_coding	18	c.1811T>C	p.Val604Ala
chrB2	154486870	A	G	PASS	missense_variant	MODERATE	WDR27	101082660	transcript	XM_019831511.2	protein_coding	18	c.1823T>C	p.Val608Ala
chrB2	154486870	A	G	PASS	missense_variant	MODERATE	WDR27	101082660	transcript	XM_023254615.1	protein_coding	17	c.1655T>C	p.Val552Ala
chrB2	154486870	A	G	PASS	missense_variant	MODERATE	WDR27	101082660	transcript	XM_019831510.2	protein_coding	17	c.1655T>C	p.Val552Ala
chrB2	154486870	A	G	PASS	missense_variant	MODERATE	WDR27	101082660	transcript	XM_019831517.2	protein_coding	18	c.1823T>C	p.Val608Ala
chrB2	154486870	A	G	PASS	missense_variant	MODERATE	WDR27	101082660	transcript	XM_019831520.2	protein_coding	18	c.1823T>C	p.Val608Ala
chrB2	154486870	A	G	PASS	missense_variant	MODERATE	WDR27	101082660	transcript	XM_019831519.2	protein_coding	18	c.1823T>C	p.Val608Ala
chrB2	154486870	A	G	PASS	missense_variant	MODERATE	WDR27	101082660	transcript	XM_019831522.2	protein_coding	18	c.1823T>C	p.Val608Ala
chrB2	154500154	T	C	PASS	missense_variant	MODERATE	WDR27	101082660	transcript	XM_019831508.2	protein_coding	12	c.1222A>G	p.Ile408Val
chrB2	154500154	T	C	PASS	missense_variant	MODERATE	WDR27	101082660	transcript	XM_019831511.2	protein_coding	12	c.1234A>G	p.Ile412Val
chrB2	154500154	T	C	PASS	missense_variant	MODERATE	WDR27	101082660	transcript	XM_023254615.1	protein_coding	11	c.1066A>G	p.Ile356Val
chrB2	154500154	T	C	PASS	missense_variant	MODERATE	WDR27	101082660	transcript	XM_019831510.2	protein_coding	11	c.1066A>G	p.Ile356Val
chrB2	154500154	T	C	PASS	missense_variant	MODERATE	WDR27	101082660	transcript	XM_019831517.2	protein_coding	12	c.1234A>G	p.Ile412Val
chrB2	154500154	T	C	PASS	missense_variant	MODERATE	WDR27	101082660	transcript	XM_019831520.2	protein_coding	12	c.1234A>G	p.Ile412Val
chrB2	154500154	T	C	PASS	missense_variant	MODERATE	WDR27	101082660	transcript	XM_019831519.2	protein_coding	12	c.1234A>G	p.Ile412Val
chrB2	154500154	T	C	PASS	missense_variant	MODERATE	WDR27	101082660	transcript	XM_019831522.2	protein_coding	12	c.1234A>G	p.Ile412Val
chrB2	154502672	A	C	PASS	missense_variant	MODERATE	WDR27	101082660	transcript	XM_019831508.2	protein_coding	10	c.1087T>G	p.Ser363Ala
chrB2	154502672	A	C	PASS	missense_variant	MODERATE	WDR27	101082660	transcript	XM_019831511.2	protein_coding	10	c.1099T>G	p.Ser367Ala
chrB2	154502672	A	C	PASS	missense_variant	MODERATE	WDR27	101082660	transcript	XM_023254615.1	protein_coding	9	c.931T>G	p.Ser311Ala
chrB2	154502672	A	C	PASS	missense_variant	MODERATE	WDR27	101082660	transcript	XM_019831510.2	protein_coding	9	c.931T>G	p.Ser311Ala
chrB2	154502672	A	C	PASS	missense_variant	MODERATE	WDR27	101082660	transcript	XM_019831517.2	protein_coding	10	c.1099T>G	p.Ser367Ala
chrB2	154502672	A	C	PASS	missense_variant	MODERATE	WDR27	101082660	transcript	XM_019831520.2	protein_coding	10	c.1099T>G	p.Ser367Ala
chrB2	154502672	A	C	PASS	missense_variant	MODERATE	WDR27	101082660	transcript	XM_019831519.2	protein_coding	10	c.1099T>G	p.Ser367Ala
chrB2	154502672	A	C	PASS	missense_variant	MODERATE	WDR27	101082660	transcript	XM_019831522.2	protein_coding	10	c.1099T>G	p.Ser367Ala
chrB2	154502677	G	A	PASS	missense_variant	MODERATE	WDR27	101082660	transcript	XM_019831508.2	protein_coding	10	c.1082C>T	p.Pro361Leu
chrB2	154502677	G	A	PASS	missense_variant	MODERATE	WDR27	101082660	transcript	XM_019831511.2	protein_coding	10	c.1094C>T	p.Pro365Leu
chrB2	154502677	G	A	PASS	missense_variant	MODERATE	WDR27	101082660	transcript	XM_023254615.1	protein_coding	9	c.926C>T	p.Pro309Leu
chrB2	154502677	G	A	PASS	missense_variant	MODERATE	WDR27	101082660	transcript	XM_019831510.2	protein_coding	9	c.926C>T	p.Pro309Leu
chrB2	154502677	G	A	PASS	missense_variant	MODERATE	WDR27	101082660	transcript	XM_019831517.2	protein_coding	10	c.1094C>T	p.Pro365Leu
chrB2	154502677	G	A	PASS	missense_variant	MODERATE	WDR27	101082660	transcript	XM_019831520.2	protein_coding	10	c.1094C>T	p.Pro365Leu
chrB2	154502677	G	A	PASS	missense_variant	MODERATE	WDR27	101082660	transcript	XM_019831519.2	protein_coding	10	c.1094C>T	p.Pro365Leu
chrB2	154502677	G	A	PASS	missense_variant	MODERATE	WDR27	101082660	transcript	XM_019831522.2	protein_coding	10	c.1094C>T	p.Pro365Leu
chrB2	154502732	C	T	PASS	missense_variant	MODERATE	WDR27	101082660	transcript	XM_019831508.2	protein_coding	10	c.1027G>A	p.Val343Met
chrB2	154502732	C	T	PASS	missense_variant	MODERATE	WDR27	101082660	transcript	XM_019831511.2	protein_coding	10	c.1039G>A	p.Val347Met
chrB2	154502732	C	T	PASS	missense_variant	MODERATE	WDR27	101082660	transcript	XM_023254615.1	protein_coding	9	c.871G>A	p.Val291Met
chrB2	154502732	C	T	PASS	missense_variant	MODERATE	WDR27	101082660	transcript	XM_019831510.2	protein_coding	9	c.871G>A	p.Val291Met
chrB2	154502732	C	T	PASS	missense_variant	MODERATE	WDR27	101082660	transcript	XM_019831517.2	protein_coding	10	c.1039G>A	p.Val347Met
chrB2	154502732	C	T	PASS	missense_variant	MODERATE	WDR27	101082660	transcript	XM_019831520.2	protein_coding	10	c.1039G>A	p.Val347Met
chrB2	154502732	C	T	PASS	missense_variant	MODERATE	WDR27	101082660	transcript	XM_019831519.2	protein_coding	10	c.1039G>A	p.Val347Met
chrB2	154502732	C	T	PASS	missense_variant	MODERATE	WDR27	101082660	transcript	XM_019831522.2	protein_coding	10	c.1039G>A	p.Val347Met
chrB2	154502767	C	T	PASS	missense_variant	MODERATE	WDR27	101082660	transcript	XM_019831508.2	protein_coding	10	c.992G>A	p.Arg331His
chrB2	154502767	C	T	PASS	missense_variant	MODERATE	WDR27	101082660	transcript	XM_019831511.2	protein_coding	10	c.1004G>A	p.Arg335His
chrB2	154502767	C	T	PASS	missense_variant	MODERATE	WDR27	101082660	transcript	XM_023254615.1	protein_coding	9	c.836G>A	p.Arg279His
chrB2	154502767	C	T	PASS	missense_variant	MODERATE	WDR27	101082660	transcript	XM_019831510.2	protein_coding	9	c.836G>A	p.Arg279His
chrB2	154502767	C	T	PASS	missense_variant	MODERATE	WDR27	101082660	transcript	XM_019831517.2	protein_coding	10	c.1004G>A	p.Arg335His
chrB2	154502767	C	T	PASS	missense_variant	MODERATE	WDR27	101082660	transcript	XM_019831520.2	protein_coding	10	c.1004G>A	p.Arg335His
chrB2	154502767	C	T	PASS	missense_variant	MODERATE	WDR27	101082660	transcript	XM_019831519.2	protein_coding	10	c.1004G>A	p.Arg335His
chrB2	154502767	C	T	PASS	missense_variant	MODERATE	WDR27	101082660	transcript	XM_019831522.2	protein_coding	10	c.1004G>A	p.Arg335His
chrB2	154502777	T	C	PASS	missense_variant&splice_region_variant	MODERATE	WDR27	101082660	transcript	XM_019831508.2	protein_coding	10	c.982A>G	p.Lys328Glu
chrB2	154502777	T	C	PASS	missense_variant	MODERATE	WDR27	101082660	transcript	XM_019831511.2	protein_coding	10	c.994A>G	p.Lys332Glu
chrB2	154502777	T	C	PASS	missense_variant	MODERATE	WDR27	101082660	transcript	XM_023254615.1	protein_coding	9	c.826A>G	p.Lys276Glu
chrB2	154502777	T	C	PASS	missense_variant	MODERATE	WDR27	101082660	transcript	XM_019831510.2	protein_coding	9	c.826A>G	p.Lys276Glu
chrB2	154502777	T	C	PASS	missense_variant	MODERATE	WDR27	101082660	transcript	XM_019831517.2	protein_coding	10	c.994A>G	p.Lys332Glu
chrB2	154502777	T	C	PASS	missense_variant	MODERATE	WDR27	101082660	transcript	XM_019831520.2	protein_coding	10	c.994A>G	p.Lys332Glu
chrB2	154502777	T	C	PASS	missense_variant	MODERATE	WDR27	101082660	transcript	XM_019831519.2	protein_coding	10	c.994A>G	p.Lys332Glu
chrB2	154502777	T	C	PASS	missense_variant	MODERATE	WDR27	101082660	transcript	XM_019831522.2	protein_coding	10	c.994A>G	p.Lys332Glu
chrB2	154506413	A	T	PASS	missense_variant	MODERATE	WDR27	101082660	transcript	XM_019831508.2	protein_coding	8	c.812T>A	p.Leu271His
chrB2	154506413	A	T	PASS	missense_variant	MODERATE	WDR27	101082660	transcript	XM_019831511.2	protein_coding	8	c.812T>A	p.Leu271His
chrB2	154506413	A	T	PASS	missense_variant	MODERATE	WDR27	101082660	transcript	XM_023254615.1	protein_coding	7	c.644T>A	p.Leu215His
chrB2	154506413	A	T	PASS	missense_variant	MODERATE	WDR27	101082660	transcript	XM_019831510.2	protein_coding	7	c.644T>A	p.Leu215His
chrB2	154506413	A	T	PASS	missense_variant	MODERATE	WDR27	101082660	transcript	XM_019831517.2	protein_coding	8	c.812T>A	p.Leu271His
chrB2	154506413	A	T	PASS	missense_variant	MODERATE	WDR27	101082660	transcript	XM_019831520.2	protein_coding	8	c.812T>A	p.Leu271His
chrB2	154506413	A	T	PASS	missense_variant	MODERATE	WDR27	101082660	transcript	XM_019831519.2	protein_coding	8	c.812T>A	p.Leu271His
chrB2	154506413	A	T	PASS	missense_variant	MODERATE	WDR27	101082660	transcript	XM_019831522.2	protein_coding	8	c.812T>A	p.Leu271His
chrB2	154511574	G	A	PASS	missense_variant	MODERATE	WDR27	101082660	transcript	XM_019831508.2	protein_coding	5	c.545C>T	p.Ala182Val
chrB2	154511574	G	A	PASS	missense_variant	MODERATE	WDR27	101082660	transcript	XM_019831511.2	protein_coding	5	c.545C>T	p.Ala182Val
chrB2	154511574	G	A	PASS	missense_variant	MODERATE	WDR27	101082660	transcript	XM_023254615.1	protein_coding	4	c.377C>T	p.Ala126Val
chrB2	154511574	G	A	PASS	missense_variant	MODERATE	WDR27	101082660	transcript	XM_019831510.2	protein_coding	4	c.377C>T	p.Ala126Val
chrB2	154511574	G	A	PASS	missense_variant	MODERATE	WDR27	101082660	transcript	XM_019831517.2	protein_coding	5	c.545C>T	p.Ala182Val
chrB2	154511574	G	A	PASS	missense_variant	MODERATE	WDR27	101082660	transcript	XM_019831520.2	protein_coding	5	c.545C>T	p.Ala182Val
chrB2	154511574	G	A	PASS	missense_variant	MODERATE	WDR27	101082660	transcript	XM_019831519.2	protein_coding	5	c.545C>T	p.Ala182Val
chrB2	154511574	G	A	PASS	missense_variant	MODERATE	WDR27	101082660	transcript	XM_019831522.2	protein_coding	5	c.545C>T	p.Ala182Val
chrB2	154511593	T	C	PASS	missense_variant	MODERATE	WDR27	101082660	transcript	XM_019831508.2	protein_coding	5	c.526A>G	p.Ser176Gly
chrB2	154511593	T	C	PASS	missense_variant	MODERATE	WDR27	101082660	transcript	XM_019831511.2	protein_coding	5	c.526A>G	p.Ser176Gly
chrB2	154511593	T	C	PASS	missense_variant	MODERATE	WDR27	101082660	transcript	XM_023254615.1	protein_coding	4	c.358A>G	p.Ser120Gly
chrB2	154511593	T	C	PASS	missense_variant	MODERATE	WDR27	101082660	transcript	XM_019831510.2	protein_coding	4	c.358A>G	p.Ser120Gly
chrB2	154511593	T	C	PASS	missense_variant	MODERATE	WDR27	101082660	transcript	XM_019831517.2	protein_coding	5	c.526A>G	p.Ser176Gly
chrB2	154511593	T	C	PASS	missense_variant	MODERATE	WDR27	101082660	transcript	XM_019831520.2	protein_coding	5	c.526A>G	p.Ser176Gly
chrB2	154511593	T	C	PASS	missense_variant	MODERATE	WDR27	101082660	transcript	XM_019831519.2	protein_coding	5	c.526A>G	p.Ser176Gly
chrB2	154511593	T	C	PASS	missense_variant	MODERATE	WDR27	101082660	transcript	XM_019831522.2	protein_coding	5	c.526A>G	p.Ser176Gly
chrB2	154516011	A	C	PASS	missense_variant	MODERATE	WDR27	101082660	transcript	XM_019831508.2	protein_coding	4	c.416T>G	p.Val139Gly
chrB2	154516011	A	C	PASS	missense_variant	MODERATE	WDR27	101082660	transcript	XM_019831511.2	protein_coding	4	c.416T>G	p.Val139Gly
chrB2	154516011	A	C	PASS	missense_variant	MODERATE	WDR27	101082660	transcript	XM_023254615.1	protein_coding	3	c.248T>G	p.Val83Gly
chrB2	154516011	A	C	PASS	missense_variant	MODERATE	WDR27	101082660	transcript	XM_019831510.2	protein_coding	3	c.248T>G	p.Val83Gly
chrB2	154516011	A	C	PASS	missense_variant	MODERATE	WDR27	101082660	transcript	XM_019831517.2	protein_coding	4	c.416T>G	p.Val139Gly
chrB2	154516011	A	C	PASS	missense_variant	MODERATE	WDR27	101082660	transcript	XM_019831520.2	protein_coding	4	c.416T>G	p.Val139Gly
chrB2	154516011	A	C	PASS	missense_variant	MODERATE	WDR27	101082660	transcript	XM_019831519.2	protein_coding	4	c.416T>G	p.Val139Gly
chrB2	154516011	A	C	PASS	missense_variant	MODERATE	WDR27	101082660	transcript	XM_019831522.2	protein_coding	4	c.416T>G	p.Val139Gly
chrB2	154516062	A	G	PASS	missense_variant	MODERATE	WDR27	101082660	transcript	XM_019831508.2	protein_coding	4	c.365T>C	p.Ile122Thr
chrB2	154516062	A	G	PASS	missense_variant	MODERATE	WDR27	101082660	transcript	XM_019831511.2	protein_coding	4	c.365T>C	p.Ile122Thr
chrB2	154516062	A	G	PASS	missense_variant	MODERATE	WDR27	101082660	transcript	XM_023254615.1	protein_coding	3	c.197T>C	p.Ile66Thr
chrB2	154516062	A	G	PASS	missense_variant	MODERATE	WDR27	101082660	transcript	XM_019831510.2	protein_coding	3	c.197T>C	p.Ile66Thr
chrB2	154516062	A	G	PASS	missense_variant	MODERATE	WDR27	101082660	transcript	XM_019831517.2	protein_coding	4	c.365T>C	p.Ile122Thr
chrB2	154516062	A	G	PASS	missense_variant	MODERATE	WDR27	101082660	transcript	XM_019831520.2	protein_coding	4	c.365T>C	p.Ile122Thr
chrB2	154516062	A	G	PASS	missense_variant	MODERATE	WDR27	101082660	transcript	XM_019831519.2	protein_coding	4	c.365T>C	p.Ile122Thr
chrB2	154516062	A	G	PASS	missense_variant	MODERATE	WDR27	101082660	transcript	XM_019831522.2	protein_coding	4	c.365T>C	p.Ile122Thr
chrB2	154522032	G	T	PASS	missense_variant	MODERATE	WDR27	101082660	transcript	XM_019831508.2	protein_coding	3	c.196C>A	p.Pro66Thr
chrB2	154522032	G	T	PASS	missense_variant	MODERATE	WDR27	101082660	transcript	XM_019831511.2	protein_coding	3	c.196C>A	p.Pro66Thr
chrB2	154522032	G	T	PASS	missense_variant	MODERATE	WDR27	101082660	transcript	XM_023254615.1	protein_coding	2	c.28C>A	p.Pro10Thr
chrB2	154522032	G	T	PASS	missense_variant	MODERATE	WDR27	101082660	transcript	XM_019831510.2	protein_coding	2	c.28C>A	p.Pro10Thr
chrB2	154522032	G	T	PASS	missense_variant	MODERATE	WDR27	101082660	transcript	XM_019831517.2	protein_coding	3	c.196C>A	p.Pro66Thr
chrB2	154522032	G	T	PASS	missense_variant	MODERATE	WDR27	101082660	transcript	XM_019831520.2	protein_coding	3	c.196C>A	p.Pro66Thr
chrB2	154522032	G	T	PASS	missense_variant	MODERATE	WDR27	101082660	transcript	XM_019831519.2	protein_coding	3	c.196C>A	p.Pro66Thr
chrB2	154522032	G	T	PASS	missense_variant	MODERATE	WDR27	101082660	transcript	XM_019831522.2	protein_coding	3	c.196C>A	p.Pro66Thr
chrB2	154522287	A	G	PASS	splice_donor_variant&intron_variant	HIGH	WDR27	101082660	transcript	XM_019831508.2	protein_coding	2	c.161+2T>C
chrB2	154522287	A	G	PASS	splice_donor_variant&intron_variant	HIGH	WDR27	101082660	transcript	XM_019831511.2	protein_coding	2	c.161+2T>C
chrB2	154522287	A	G	PASS	splice_donor_variant&intron_variant	HIGH	WDR27	101082660	transcript	XM_019831517.2	protein_coding	2	c.161+2T>C
chrB2	154522287	A	G	PASS	splice_donor_variant&intron_variant	HIGH	WDR27	101082660	transcript	XM_019831520.2	protein_coding	2	c.161+2T>C
chrB2	154522287	A	G	PASS	splice_donor_variant&intron_variant	HIGH	WDR27	101082660	transcript	XR_002157717.2	pseudogene	2	n.944+2T>C
chrB2	154522287	A	G	PASS	splice_donor_variant&intron_variant	HIGH	WDR27	101082660	transcript	XR_002157718.2	pseudogene	2	n.947+2T>C
chrB2	154522287	A	G	PASS	splice_donor_variant&intron_variant	HIGH	WDR27	101082660	transcript	XR_002742562.1	pseudogene	2	n.944+2T>C
chrB2	154522287	A	G	PASS	splice_donor_variant&intron_variant	HIGH	WDR27	101082660	transcript	XR_002742561.1	pseudogene	2	n.944+2T>C
chrB2	154522287	A	G	PASS	splice_donor_variant&intron_variant	HIGH	WDR27	101082660	transcript	XR_002742563.1	pseudogene	2	n.947+2T>C
chrB2	154522287	A	G	PASS	splice_donor_variant&intron_variant	HIGH	WDR27	101082660	transcript	XM_019831519.2	protein_coding	2	c.161+2T>C
chrB2	154522287	A	G	PASS	splice_donor_variant&intron_variant	HIGH	WDR27	101082660	transcript	XM_019831522.2	protein_coding	2	c.161+2T>C
chrB2	154522310	G	C	PASS	missense_variant	MODERATE	WDR27	101082660	transcript	XM_019831508.2	protein_coding	2	c.140C>G	p.Ala47Gly
chrB2	154522310	G	C	PASS	missense_variant	MODERATE	WDR27	101082660	transcript	XM_019831511.2	protein_coding	2	c.140C>G	p.Ala47Gly
chrB2	154522310	G	C	PASS	missense_variant	MODERATE	WDR27	101082660	transcript	XM_019831517.2	protein_coding	2	c.140C>G	p.Ala47Gly
chrB2	154522310	G	C	PASS	missense_variant	MODERATE	WDR27	101082660	transcript	XM_019831520.2	protein_coding	2	c.140C>G	p.Ala47Gly
chrB2	154522310	G	C	PASS	missense_variant	MODERATE	WDR27	101082660	transcript	XM_019831519.2	protein_coding	2	c.140C>G	p.Ala47Gly
chrB2	154522310	G	C	PASS	missense_variant	MODERATE	WDR27	101082660	transcript	XM_019831522.2	protein_coding	2	c.140C>G	p.Ala47Gly
chrB2	154522398	T	C	PASS	missense_variant	MODERATE	WDR27	101082660	transcript	XM_019831508.2	protein_coding	2	c.52A>G	p.Ile18Val
chrB2	154522398	T	C	PASS	missense_variant	MODERATE	WDR27	101082660	transcript	XM_019831511.2	protein_coding	2	c.52A>G	p.Ile18Val
chrB2	154522398	T	C	PASS	missense_variant	MODERATE	WDR27	101082660	transcript	XM_019831517.2	protein_coding	2	c.52A>G	p.Ile18Val
chrB2	154522398	T	C	PASS	missense_variant	MODERATE	WDR27	101082660	transcript	XM_019831520.2	protein_coding	2	c.52A>G	p.Ile18Val
chrB2	154522398	T	C	PASS	missense_variant	MODERATE	WDR27	101082660	transcript	XM_019831519.2	protein_coding	2	c.52A>G	p.Ile18Val
chrB2	154522398	T	C	PASS	missense_variant	MODERATE	WDR27	101082660	transcript	XM_019831522.2	protein_coding	2	c.52A>G	p.Ile18Val
chrB2	154522412	A	G	PASS	missense_variant	MODERATE	WDR27	101082660	transcript	XM_019831508.2	protein_coding	2	c.38T>C	p.Val13Ala
chrB2	154522412	A	G	PASS	missense_variant	MODERATE	WDR27	101082660	transcript	XM_019831511.2	protein_coding	2	c.38T>C	p.Val13Ala
chrB2	154522412	A	G	PASS	missense_variant	MODERATE	WDR27	101082660	transcript	XM_019831517.2	protein_coding	2	c.38T>C	p.Val13Ala
chrB2	154522412	A	G	PASS	missense_variant	MODERATE	WDR27	101082660	transcript	XM_019831520.2	protein_coding	2	c.38T>C	p.Val13Ala
chrB2	154522412	A	G	PASS	missense_variant	MODERATE	WDR27	101082660	transcript	XM_019831519.2	protein_coding	2	c.38T>C	p.Val13Ala
chrB2	154522412	A	G	PASS	missense_variant	MODERATE	WDR27	101082660	transcript	XM_019831522.2	protein_coding	2	c.38T>C	p.Val13Ala
chrB2	154585541	C	G	PASS	missense_variant	MODERATE	ERMARD	101083430	transcript	XM_019831525.2	protein_coding	3	c.235C>G	p.Gln79Glu
chrB2	154585541	C	G	PASS	missense_variant	MODERATE	ERMARD	101083430	transcript	XM_019831530.2	protein_coding	3	c.235C>G	p.Gln79Glu
chrB2	154585541	C	G	PASS	missense_variant	MODERATE	ERMARD	101083430	transcript	XM_019831529.2	protein_coding	3	c.235C>G	p.Gln79Glu
chrB2	154585541	C	G	PASS	missense_variant	MODERATE	ERMARD	101083430	transcript	XM_019831527.2	protein_coding	3	c.235C>G	p.Gln79Glu
chrB2	154585541	C	G	PASS	missense_variant	MODERATE	ERMARD	101083430	transcript	XM_019831528.2	protein_coding	2	c.163C>G	p.Gln55Glu
chrB2	154585541	C	G	PASS	missense_variant	MODERATE	ERMARD	101083430	transcript	XM_023254617.1	protein_coding	3	c.235C>G	p.Gln79Glu
chrB2	154586118	T	C	PASS	missense_variant	MODERATE	ERMARD	101083430	transcript	XM_019831525.2	protein_coding	4	c.299T>C	p.Val100Ala
chrB2	154586118	T	C	PASS	missense_variant	MODERATE	ERMARD	101083430	transcript	XM_019831530.2	protein_coding	4	c.299T>C	p.Val100Ala
chrB2	154586118	T	C	PASS	missense_variant	MODERATE	ERMARD	101083430	transcript	XM_019831529.2	protein_coding	4	c.299T>C	p.Val100Ala
chrB2	154586118	T	C	PASS	missense_variant	MODERATE	ERMARD	101083430	transcript	XM_019831527.2	protein_coding	4	c.299T>C	p.Val100Ala
chrB2	154586118	T	C	PASS	missense_variant	MODERATE	ERMARD	101083430	transcript	XM_019831528.2	protein_coding	3	c.227T>C	p.Val76Ala
chrB2	154586118	T	C	PASS	missense_variant	MODERATE	ERMARD	101083430	transcript	XM_023254617.1	protein_coding	4	c.299T>C	p.Val100Ala
chrB2	154588318	G	A	PASS	missense_variant	MODERATE	ERMARD	101083430	transcript	XM_019831525.2	protein_coding	6	c.541G>A	p.Glu181Lys
chrB2	154588318	G	A	PASS	missense_variant	MODERATE	ERMARD	101083430	transcript	XM_019831530.2	protein_coding	6	c.541G>A	p.Glu181Lys
chrB2	154588318	G	A	PASS	missense_variant	MODERATE	ERMARD	101083430	transcript	XM_019831529.2	protein_coding	6	c.541G>A	p.Glu181Lys
chrB2	154588318	G	A	PASS	missense_variant	MODERATE	ERMARD	101083430	transcript	XM_019831527.2	protein_coding	6	c.541G>A	p.Glu181Lys
chrB2	154588318	G	A	PASS	missense_variant	MODERATE	ERMARD	101083430	transcript	XM_019831528.2	protein_coding	5	c.469G>A	p.Glu157Lys
chrB2	154588318	G	A	PASS	missense_variant	MODERATE	ERMARD	101083430	transcript	XM_023254617.1	protein_coding	6	c.541G>A	p.Glu181Lys
chrB2	154588318	G	A	PASS	missense_variant	MODERATE	ERMARD	101083430	transcript	XM_019831531.2	protein_coding	2	c.178G>A	p.Glu60Lys
chrB2	154589762	A	G	PASS	missense_variant	MODERATE	ERMARD	101083430	transcript	XM_019831532.2	protein_coding	3	c.88A>G	p.Ile30Val
chrB2	154593860	G	A	PASS	missense_variant	MODERATE	ERMARD	101083430	transcript	XM_019831525.2	protein_coding	10	c.1007G>A	p.Arg336Gln
chrB2	154593860	G	A	PASS	missense_variant	MODERATE	ERMARD	101083430	transcript	XM_019831530.2	protein_coding	10	c.1007G>A	p.Arg336Gln
chrB2	154593860	G	A	PASS	missense_variant	MODERATE	ERMARD	101083430	transcript	XM_019831529.2	protein_coding	10	c.1007G>A	p.Arg336Gln
chrB2	154593860	G	A	PASS	missense_variant	MODERATE	ERMARD	101083430	transcript	XM_019831527.2	protein_coding	10	c.1007G>A	p.Arg336Gln
chrB2	154593860	G	A	PASS	missense_variant	MODERATE	ERMARD	101083430	transcript	XM_019831528.2	protein_coding	9	c.935G>A	p.Arg312Gln
chrB2	154593860	G	A	PASS	missense_variant	MODERATE	ERMARD	101083430	transcript	XM_023254617.1	protein_coding	10	c.1007G>A	p.Arg336Gln
chrB2	154593860	G	A	PASS	missense_variant	MODERATE	ERMARD	101083430	transcript	XM_019831532.2	protein_coding	7	c.545G>A	p.Arg182Gln
chrB2	154593860	G	A	PASS	missense_variant	MODERATE	ERMARD	101083430	transcript	XM_019831531.2	protein_coding	6	c.644G>A	p.Arg215Gln
chrB2	154594835	T	C	PASS	missense_variant	MODERATE	ERMARD	101083430	transcript	XM_019831530.2	protein_coding	11	c.1115T>C	p.Leu372Pro
chrB2	154594870	T	C	PASS	missense_variant	MODERATE	ERMARD	101083430	transcript	XM_019831530.2	protein_coding	11	c.1150T>C	p.Ser384Pro
chrB2	154594877	T	C	PASS	missense_variant	MODERATE	ERMARD	101083430	transcript	XM_019831530.2	protein_coding	11	c.1157T>C	p.Leu386Pro
chrB2	154594880	C	G	PASS	missense_variant	MODERATE	ERMARD	101083430	transcript	XM_019831530.2	protein_coding	11	c.1160C>G	p.Ser387Cys
chrB2	154594895	C	T	PASS	missense_variant	MODERATE	ERMARD	101083430	transcript	XM_019831530.2	protein_coding	11	c.1175C>T	p.Ser392Leu
chrB2	154594942	A	C	PASS	missense_variant	MODERATE	ERMARD	101083430	transcript	XM_019831530.2	protein_coding	11	c.1222A>C	p.Thr408Pro
chrB2	154594987	T	G	PASS	missense_variant	MODERATE	ERMARD	101083430	transcript	XM_019831530.2	protein_coding	11	c.1267T>G	p.Phe423Val
chrB2	154595149	T	C	PASS	missense_variant	MODERATE	ERMARD	101083430	transcript	XM_019831530.2	protein_coding	11	c.1429T>C	p.Trp477Arg
chrB2	154595368	A	G	PASS	missense_variant	MODERATE	ERMARD	101083430	transcript	XM_019831530.2	protein_coding	11	c.1648A>G	p.Thr550Ala
chrB2	154595474	T	G	PASS	missense_variant	MODERATE	ERMARD	101083430	transcript	XM_019831530.2	protein_coding	11	c.1754T>G	p.Val585Gly
chrB2	154595486	T	C	PASS	missense_variant	MODERATE	ERMARD	101083430	transcript	XM_019831530.2	protein_coding	11	c.1766T>C	p.Phe589Ser
chrB2	154595537	T	C	PASS	missense_variant	MODERATE	ERMARD	101083430	transcript	XM_019831530.2	protein_coding	11	c.1817T>C	p.Val606Ala
chrB2	154598506	G	A	PASS	missense_variant	MODERATE	ERMARD	101083430	transcript	XM_019831525.2	protein_coding	12	c.1076G>A	p.Ser359Asn
chrB2	154598506	G	A	PASS	missense_variant	MODERATE	ERMARD	101083430	transcript	XM_019831529.2	protein_coding	12	c.1076G>A	p.Ser359Asn
chrB2	154598506	G	A	PASS	missense_variant	MODERATE	ERMARD	101083430	transcript	XM_019831527.2	protein_coding	12	c.1076G>A	p.Ser359Asn
chrB2	154598506	G	A	PASS	missense_variant	MODERATE	ERMARD	101083430	transcript	XM_019831528.2	protein_coding	11	c.1004G>A	p.Ser335Asn
chrB2	154598506	G	A	PASS	missense_variant	MODERATE	ERMARD	101083430	transcript	XM_023254617.1	protein_coding	11	c.1046G>A	p.Ser349Asn
chrB2	154598506	G	A	PASS	missense_variant	MODERATE	ERMARD	101083430	transcript	XM_019831532.2	protein_coding	9	c.614G>A	p.Ser205Asn
chrB2	154598506	G	A	PASS	missense_variant	MODERATE	ERMARD	101083430	transcript	XM_019831531.2	protein_coding	8	c.713G>A	p.Ser238Asn
chrB2	154599958	T	C	PASS	missense_variant	MODERATE	ERMARD	101083430	transcript	XM_019831525.2	protein_coding	13	c.1169T>C	p.Val390Ala
chrB2	154599958	T	C	PASS	missense_variant	MODERATE	ERMARD	101083430	transcript	XM_019831529.2	protein_coding	13	c.1169T>C	p.Val390Ala
chrB2	154599958	T	C	PASS	missense_variant	MODERATE	ERMARD	101083430	transcript	XM_019831527.2	protein_coding	13	c.1169T>C	p.Val390Ala
chrB2	154599958	T	C	PASS	missense_variant	MODERATE	ERMARD	101083430	transcript	XM_019831528.2	protein_coding	12	c.1097T>C	p.Val366Ala
chrB2	154599958	T	C	PASS	missense_variant	MODERATE	ERMARD	101083430	transcript	XM_023254617.1	protein_coding	12	c.1139T>C	p.Val380Ala
chrB2	154599958	T	C	PASS	missense_variant	MODERATE	ERMARD	101083430	transcript	XM_019831532.2	protein_coding	10	c.707T>C	p.Val236Ala
chrB2	154599958	T	C	PASS	missense_variant	MODERATE	ERMARD	101083430	transcript	XM_019831531.2	protein_coding	9	c.806T>C	p.Val269Ala
chrB2	154599988	G	A	PASS	missense_variant	MODERATE	ERMARD	101083430	transcript	XM_019831525.2	protein_coding	13	c.1199G>A	p.Ser400Asn
chrB2	154599988	G	A	PASS	missense_variant	MODERATE	ERMARD	101083430	transcript	XM_019831529.2	protein_coding	13	c.1199G>A	p.Ser400Asn
chrB2	154599988	G	A	PASS	missense_variant	MODERATE	ERMARD	101083430	transcript	XM_019831527.2	protein_coding	13	c.1199G>A	p.Ser400Asn
chrB2	154599988	G	A	PASS	missense_variant	MODERATE	ERMARD	101083430	transcript	XM_019831528.2	protein_coding	12	c.1127G>A	p.Ser376Asn
chrB2	154599988	G	A	PASS	missense_variant	MODERATE	ERMARD	101083430	transcript	XM_023254617.1	protein_coding	12	c.1169G>A	p.Ser390Asn
chrB2	154599988	G	A	PASS	missense_variant	MODERATE	ERMARD	101083430	transcript	XM_019831532.2	protein_coding	10	c.737G>A	p.Ser246Asn
chrB2	154599988	G	A	PASS	missense_variant	MODERATE	ERMARD	101083430	transcript	XM_019831531.2	protein_coding	9	c.836G>A	p.Ser279Asn
chrB2	154603195	G	A	PASS	missense_variant	MODERATE	ERMARD	101083430	transcript	XM_019831525.2	protein_coding	14	c.1340G>A	p.Ser447Asn
chrB2	154603195	G	A	PASS	missense_variant	MODERATE	ERMARD	101083430	transcript	XM_019831529.2	protein_coding	14	c.1340G>A	p.Ser447Asn
chrB2	154603195	G	A	PASS	missense_variant	MODERATE	ERMARD	101083430	transcript	XM_019831527.2	protein_coding	14	c.1340G>A	p.Ser447Asn
chrB2	154603195	G	A	PASS	missense_variant	MODERATE	ERMARD	101083430	transcript	XM_019831528.2	protein_coding	13	c.1268G>A	p.Ser423Asn
chrB2	154603195	G	A	PASS	missense_variant	MODERATE	ERMARD	101083430	transcript	XM_023254617.1	protein_coding	13	c.1310G>A	p.Ser437Asn
chrB2	154603195	G	A	PASS	missense_variant	MODERATE	ERMARD	101083430	transcript	XM_019831532.2	protein_coding	11	c.878G>A	p.Ser293Asn
chrB2	154603195	G	A	PASS	missense_variant	MODERATE	ERMARD	101083430	transcript	XM_019831531.2	protein_coding	10	c.977G>A	p.Ser326Asn
chrB2	154605618	T	C	PASS	missense_variant	MODERATE	ERMARD	101083430	transcript	XM_019831525.2	protein_coding	16	c.1511T>C	p.Met504Thr
chrB2	154605618	T	C	PASS	missense_variant	MODERATE	ERMARD	101083430	transcript	XM_019831529.2	protein_coding	16	c.1511T>C	p.Met504Thr
chrB2	154605618	T	C	PASS	missense_variant	MODERATE	ERMARD	101083430	transcript	XM_019831527.2	protein_coding	16	c.1511T>C	p.Met504Thr
chrB2	154605618	T	C	PASS	missense_variant	MODERATE	ERMARD	101083430	transcript	XM_019831528.2	protein_coding	15	c.1439T>C	p.Met480Thr
chrB2	154605618	T	C	PASS	missense_variant	MODERATE	ERMARD	101083430	transcript	XM_023254617.1	protein_coding	15	c.1481T>C	p.Met494Thr
chrB2	154605618	T	C	PASS	missense_variant	MODERATE	ERMARD	101083430	transcript	XM_019831532.2	protein_coding	13	c.1049T>C	p.Met350Thr
chrB2	154605618	T	C	PASS	missense_variant	MODERATE	ERMARD	101083430	transcript	XM_019831531.2	protein_coding	12	c.1148T>C	p.Met383Thr
chrB2	154605648	A	G	PASS	missense_variant	MODERATE	ERMARD	101083430	transcript	XM_019831525.2	protein_coding	16	c.1541A>G	p.Asp514Gly
chrB2	154605648	A	G	PASS	missense_variant	MODERATE	ERMARD	101083430	transcript	XM_019831529.2	protein_coding	16	c.1541A>G	p.Asp514Gly
chrB2	154605648	A	G	PASS	missense_variant	MODERATE	ERMARD	101083430	transcript	XM_019831527.2	protein_coding	16	c.1541A>G	p.Asp514Gly
chrB2	154605648	A	G	PASS	missense_variant	MODERATE	ERMARD	101083430	transcript	XM_019831528.2	protein_coding	15	c.1469A>G	p.Asp490Gly
chrB2	154605648	A	G	PASS	missense_variant	MODERATE	ERMARD	101083430	transcript	XM_023254617.1	protein_coding	15	c.1511A>G	p.Asp504Gly
chrB2	154605648	A	G	PASS	missense_variant	MODERATE	ERMARD	101083430	transcript	XM_019831532.2	protein_coding	13	c.1079A>G	p.Asp360Gly
chrB2	154605648	A	G	PASS	missense_variant	MODERATE	ERMARD	101083430	transcript	XM_019831531.2	protein_coding	12	c.1178A>G	p.Asp393Gly
chrB2	154608849	G	A	PASS	missense_variant	MODERATE	ERMARD	101083430	transcript	XM_019831525.2	protein_coding	19	c.2071G>A	p.Gly691Arg
chrB2	154608849	G	A	PASS	missense_variant	MODERATE	ERMARD	101083430	transcript	XM_019831527.2	protein_coding	19	c.2011G>A	p.Gly671Arg
chrB2	154608849	G	A	PASS	missense_variant	MODERATE	ERMARD	101083430	transcript	XM_019831528.2	protein_coding	18	c.1999G>A	p.Gly667Arg
chrB2	154608849	G	A	PASS	missense_variant	MODERATE	ERMARD	101083430	transcript	XM_023254617.1	protein_coding	18	c.2041G>A	p.Gly681Arg
chrB2	154608849	G	A	PASS	missense_variant	MODERATE	ERMARD	101083430	transcript	XM_019831532.2	protein_coding	16	c.1609G>A	p.Gly537Arg
chrB2	154608849	G	A	PASS	missense_variant	MODERATE	ERMARD	101083430	transcript	XM_019831531.2	protein_coding	15	c.1708G>A	p.Gly570Arg
chrB2	154608858	G	A	PASS	missense_variant	MODERATE	ERMARD	101083430	transcript	XM_019831525.2	protein_coding	19	c.2080G>A	p.Ala694Thr
chrB2	154608858	G	A	PASS	missense_variant	MODERATE	ERMARD	101083430	transcript	XM_019831527.2	protein_coding	19	c.2020G>A	p.Ala674Thr
chrB2	154608858	G	A	PASS	missense_variant	MODERATE	ERMARD	101083430	transcript	XM_019831528.2	protein_coding	18	c.2008G>A	p.Ala670Thr
chrB2	154608858	G	A	PASS	missense_variant	MODERATE	ERMARD	101083430	transcript	XM_023254617.1	protein_coding	18	c.2050G>A	p.Ala684Thr
chrB2	154608858	G	A	PASS	missense_variant	MODERATE	ERMARD	101083430	transcript	XM_019831532.2	protein_coding	16	c.1618G>A	p.Ala540Thr
chrB2	154608858	G	A	PASS	missense_variant	MODERATE	ERMARD	101083430	transcript	XM_019831531.2	protein_coding	15	c.1717G>A	p.Ala573Thr
chrB2	154983162	A	G	PASS	missense_variant	MODERATE	DLL1	101083683	transcript	XM_023254631.1	protein_coding	9	c.1970T>C	p.Val657Ala
chrB2	154983166	C	T	PASS	missense_variant	MODERATE	DLL1	101083683	transcript	XM_023254631.1	protein_coding	9	c.1966G>A	p.Ala656Thr
chrB2	154985497	C	G	PASS	missense_variant	MODERATE	DLL1	101083683	transcript	XM_023254631.1	protein_coding	8	c.1183G>C	p.Val395Leu
chrB2	155008190	C	G	PASS	missense_variant	MODERATE	FAM120B	101083940	transcript	XM_019831534.2	protein_coding	1	c.32C>G	p.Thr11Arg
chrB2	155008190	C	G	PASS	missense_variant	MODERATE	FAM120B	101083940	transcript	XM_023254630.1	protein_coding	1	c.32C>G	p.Thr11Arg
chrB2	155008190	C	G	PASS	missense_variant	MODERATE	FAM120B	101083940	transcript	XM_019831536.2	protein_coding	1	c.32C>G	p.Thr11Arg
chrB2	155008190	C	G	PASS	missense_variant	MODERATE	FAM120B	101083940	transcript	XM_019831542.2	protein_coding	1	c.32C>G	p.Thr11Arg
chrB2	155008190	C	G	PASS	missense_variant	MODERATE	FAM120B	101083940	transcript	XM_019831540.2	protein_coding	1	c.32C>G	p.Thr11Arg
chrB2	155008190	C	G	PASS	missense_variant	MODERATE	FAM120B	101083940	transcript	XM_019831535.2	protein_coding	1	c.32C>G	p.Thr11Arg
chrB2	155008190	C	G	PASS	missense_variant	MODERATE	FAM120B	101083940	transcript	XM_023254629.1	protein_coding	1	c.32C>G	p.Thr11Arg
chrB2	155008190	C	G	PASS	missense_variant	MODERATE	FAM120B	101083940	transcript	XM_023254626.1	protein_coding	1	c.32C>G	p.Thr11Arg
chrB2	155008190	C	G	PASS	missense_variant	MODERATE	FAM120B	101083940	transcript	XM_019831541.2	protein_coding	1	c.32C>G	p.Thr11Arg
chrB2	155008190	C	G	PASS	missense_variant	MODERATE	FAM120B	101083940	transcript	XM_023254627.1	protein_coding	1	c.32C>G	p.Thr11Arg
chrB2	155008190	C	G	PASS	missense_variant	MODERATE	FAM120B	101083940	transcript	XM_023254628.1	protein_coding	1	c.32C>G	p.Thr11Arg
chrB2	155020501	C	G	PASS	missense_variant	MODERATE	FAM120B	101083940	transcript	XM_019831534.2	protein_coding	2	c.1213C>G	p.Pro405Ala
chrB2	155020501	C	G	PASS	missense_variant	MODERATE	FAM120B	101083940	transcript	XM_019831538.1	protein_coding	2	c.1111C>G	p.Pro371Ala
chrB2	155020501	C	G	PASS	missense_variant	MODERATE	FAM120B	101083940	transcript	XM_023254630.1	protein_coding	2	c.1213C>G	p.Pro405Ala
chrB2	155020501	C	G	PASS	missense_variant	MODERATE	FAM120B	101083940	transcript	XM_019831536.2	protein_coding	2	c.1213C>G	p.Pro405Ala
chrB2	155020501	C	G	PASS	missense_variant	MODERATE	FAM120B	101083940	transcript	XM_019831542.2	protein_coding	2	c.1213C>G	p.Pro405Ala
chrB2	155020501	C	G	PASS	missense_variant	MODERATE	FAM120B	101083940	transcript	XM_019831540.2	protein_coding	2	c.1213C>G	p.Pro405Ala
chrB2	155020501	C	G	PASS	missense_variant	MODERATE	FAM120B	101083940	transcript	XM_019831535.2	protein_coding	2	c.1213C>G	p.Pro405Ala
chrB2	155020501	C	G	PASS	missense_variant	MODERATE	FAM120B	101083940	transcript	XM_023254629.1	protein_coding	2	c.1213C>G	p.Pro405Ala
chrB2	155020501	C	G	PASS	missense_variant	MODERATE	FAM120B	101083940	transcript	XM_023254626.1	protein_coding	2	c.1213C>G	p.Pro405Ala
chrB2	155020501	C	G	PASS	missense_variant	MODERATE	FAM120B	101083940	transcript	XM_019831541.2	protein_coding	2	c.1213C>G	p.Pro405Ala
chrB2	155020501	C	G	PASS	missense_variant	MODERATE	FAM120B	101083940	transcript	XM_023254627.1	protein_coding	2	c.1213C>G	p.Pro405Ala
chrB2	155020501	C	G	PASS	missense_variant	MODERATE	FAM120B	101083940	transcript	XM_023254628.1	protein_coding	2	c.1213C>G	p.Pro405Ala
chrB2	155020501	C	G	PASS	missense_variant	MODERATE	FAM120B	101083940	transcript	XM_019831537.1	protein_coding	1	c.1111C>G	p.Pro371Ala
chrB2	155020530	G	T	PASS	missense_variant	MODERATE	FAM120B	101083940	transcript	XM_019831534.2	protein_coding	2	c.1242G>T	p.Trp414Cys
chrB2	155020530	G	T	PASS	missense_variant	MODERATE	FAM120B	101083940	transcript	XM_019831538.1	protein_coding	2	c.1140G>T	p.Trp380Cys
chrB2	155020530	G	T	PASS	missense_variant	MODERATE	FAM120B	101083940	transcript	XM_023254630.1	protein_coding	2	c.1242G>T	p.Trp414Cys
chrB2	155020530	G	T	PASS	missense_variant	MODERATE	FAM120B	101083940	transcript	XM_019831536.2	protein_coding	2	c.1242G>T	p.Trp414Cys
chrB2	155020530	G	T	PASS	missense_variant	MODERATE	FAM120B	101083940	transcript	XM_019831542.2	protein_coding	2	c.1242G>T	p.Trp414Cys
chrB2	155020530	G	T	PASS	missense_variant	MODERATE	FAM120B	101083940	transcript	XM_019831540.2	protein_coding	2	c.1242G>T	p.Trp414Cys
chrB2	155020530	G	T	PASS	missense_variant	MODERATE	FAM120B	101083940	transcript	XM_019831535.2	protein_coding	2	c.1242G>T	p.Trp414Cys
chrB2	155020530	G	T	PASS	missense_variant	MODERATE	FAM120B	101083940	transcript	XM_023254629.1	protein_coding	2	c.1242G>T	p.Trp414Cys
chrB2	155020530	G	T	PASS	missense_variant	MODERATE	FAM120B	101083940	transcript	XM_023254626.1	protein_coding	2	c.1242G>T	p.Trp414Cys
chrB2	155020530	G	T	PASS	missense_variant	MODERATE	FAM120B	101083940	transcript	XM_019831541.2	protein_coding	2	c.1242G>T	p.Trp414Cys
chrB2	155020530	G	T	PASS	missense_variant	MODERATE	FAM120B	101083940	transcript	XM_023254627.1	protein_coding	2	c.1242G>T	p.Trp414Cys
chrB2	155020530	G	T	PASS	missense_variant	MODERATE	FAM120B	101083940	transcript	XM_023254628.1	protein_coding	2	c.1242G>T	p.Trp414Cys
chrB2	155020530	G	T	PASS	missense_variant	MODERATE	FAM120B	101083940	transcript	XM_019831537.1	protein_coding	1	c.1140G>T	p.Trp380Cys
chrB2	155020570	G	A	PASS	missense_variant	MODERATE	FAM120B	101083940	transcript	XM_019831534.2	protein_coding	2	c.1282G>A	p.Asp428Asn
chrB2	155020570	G	A	PASS	missense_variant	MODERATE	FAM120B	101083940	transcript	XM_019831538.1	protein_coding	2	c.1180G>A	p.Asp394Asn
chrB2	155020570	G	A	PASS	missense_variant	MODERATE	FAM120B	101083940	transcript	XM_023254630.1	protein_coding	2	c.1282G>A	p.Asp428Asn
chrB2	155020570	G	A	PASS	missense_variant	MODERATE	FAM120B	101083940	transcript	XM_019831536.2	protein_coding	2	c.1282G>A	p.Asp428Asn
chrB2	155020570	G	A	PASS	missense_variant	MODERATE	FAM120B	101083940	transcript	XM_019831542.2	protein_coding	2	c.1282G>A	p.Asp428Asn
chrB2	155020570	G	A	PASS	missense_variant	MODERATE	FAM120B	101083940	transcript	XM_019831540.2	protein_coding	2	c.1282G>A	p.Asp428Asn
chrB2	155020570	G	A	PASS	missense_variant	MODERATE	FAM120B	101083940	transcript	XM_019831535.2	protein_coding	2	c.1282G>A	p.Asp428Asn
chrB2	155020570	G	A	PASS	missense_variant	MODERATE	FAM120B	101083940	transcript	XM_023254629.1	protein_coding	2	c.1282G>A	p.Asp428Asn
chrB2	155020570	G	A	PASS	missense_variant	MODERATE	FAM120B	101083940	transcript	XM_023254626.1	protein_coding	2	c.1282G>A	p.Asp428Asn
chrB2	155020570	G	A	PASS	missense_variant	MODERATE	FAM120B	101083940	transcript	XM_019831541.2	protein_coding	2	c.1282G>A	p.Asp428Asn
chrB2	155020570	G	A	PASS	missense_variant	MODERATE	FAM120B	101083940	transcript	XM_023254627.1	protein_coding	2	c.1282G>A	p.Asp428Asn
chrB2	155020570	G	A	PASS	missense_variant	MODERATE	FAM120B	101083940	transcript	XM_023254628.1	protein_coding	2	c.1282G>A	p.Asp428Asn
chrB2	155020570	G	A	PASS	missense_variant	MODERATE	FAM120B	101083940	transcript	XM_019831537.1	protein_coding	1	c.1180G>A	p.Asp394Asn
chrB2	155020618	A	C	PASS	missense_variant	MODERATE	FAM120B	101083940	transcript	XM_019831534.2	protein_coding	2	c.1330A>C	p.Lys444Gln
chrB2	155020618	A	C	PASS	missense_variant	MODERATE	FAM120B	101083940	transcript	XM_019831538.1	protein_coding	2	c.1228A>C	p.Lys410Gln
chrB2	155020618	A	C	PASS	missense_variant	MODERATE	FAM120B	101083940	transcript	XM_023254630.1	protein_coding	2	c.1330A>C	p.Lys444Gln
chrB2	155020618	A	C	PASS	missense_variant	MODERATE	FAM120B	101083940	transcript	XM_019831536.2	protein_coding	2	c.1330A>C	p.Lys444Gln
chrB2	155020618	A	C	PASS	missense_variant	MODERATE	FAM120B	101083940	transcript	XM_019831542.2	protein_coding	2	c.1330A>C	p.Lys444Gln
chrB2	155020618	A	C	PASS	missense_variant	MODERATE	FAM120B	101083940	transcript	XM_019831540.2	protein_coding	2	c.1330A>C	p.Lys444Gln
chrB2	155020618	A	C	PASS	missense_variant	MODERATE	FAM120B	101083940	transcript	XM_019831535.2	protein_coding	2	c.1330A>C	p.Lys444Gln
chrB2	155020618	A	C	PASS	missense_variant	MODERATE	FAM120B	101083940	transcript	XM_023254629.1	protein_coding	2	c.1330A>C	p.Lys444Gln
chrB2	155020618	A	C	PASS	missense_variant	MODERATE	FAM120B	101083940	transcript	XM_023254626.1	protein_coding	2	c.1330A>C	p.Lys444Gln
chrB2	155020618	A	C	PASS	missense_variant	MODERATE	FAM120B	101083940	transcript	XM_019831541.2	protein_coding	2	c.1330A>C	p.Lys444Gln
chrB2	155020618	A	C	PASS	missense_variant	MODERATE	FAM120B	101083940	transcript	XM_023254627.1	protein_coding	2	c.1330A>C	p.Lys444Gln
chrB2	155020618	A	C	PASS	missense_variant	MODERATE	FAM120B	101083940	transcript	XM_023254628.1	protein_coding	2	c.1330A>C	p.Lys444Gln
chrB2	155020618	A	C	PASS	missense_variant	MODERATE	FAM120B	101083940	transcript	XM_019831537.1	protein_coding	1	c.1228A>C	p.Lys410Gln
chrB2	155020640	C	T	PASS	missense_variant	MODERATE	FAM120B	101083940	transcript	XM_019831534.2	protein_coding	2	c.1352C>T	p.Thr451Ile
chrB2	155020640	C	T	PASS	missense_variant	MODERATE	FAM120B	101083940	transcript	XM_019831538.1	protein_coding	2	c.1250C>T	p.Thr417Ile
chrB2	155020640	C	T	PASS	missense_variant	MODERATE	FAM120B	101083940	transcript	XM_023254630.1	protein_coding	2	c.1352C>T	p.Thr451Ile
chrB2	155020640	C	T	PASS	missense_variant	MODERATE	FAM120B	101083940	transcript	XM_019831536.2	protein_coding	2	c.1352C>T	p.Thr451Ile
chrB2	155020640	C	T	PASS	missense_variant	MODERATE	FAM120B	101083940	transcript	XM_019831542.2	protein_coding	2	c.1352C>T	p.Thr451Ile
chrB2	155020640	C	T	PASS	missense_variant	MODERATE	FAM120B	101083940	transcript	XM_019831540.2	protein_coding	2	c.1352C>T	p.Thr451Ile
chrB2	155020640	C	T	PASS	missense_variant	MODERATE	FAM120B	101083940	transcript	XM_019831535.2	protein_coding	2	c.1352C>T	p.Thr451Ile
chrB2	155020640	C	T	PASS	missense_variant	MODERATE	FAM120B	101083940	transcript	XM_023254629.1	protein_coding	2	c.1352C>T	p.Thr451Ile
chrB2	155020640	C	T	PASS	missense_variant	MODERATE	FAM120B	101083940	transcript	XM_023254626.1	protein_coding	2	c.1352C>T	p.Thr451Ile
chrB2	155020640	C	T	PASS	missense_variant	MODERATE	FAM120B	101083940	transcript	XM_019831541.2	protein_coding	2	c.1352C>T	p.Thr451Ile
chrB2	155020640	C	T	PASS	missense_variant	MODERATE	FAM120B	101083940	transcript	XM_023254627.1	protein_coding	2	c.1352C>T	p.Thr451Ile
chrB2	155020640	C	T	PASS	missense_variant	MODERATE	FAM120B	101083940	transcript	XM_023254628.1	protein_coding	2	c.1352C>T	p.Thr451Ile
chrB2	155020640	C	T	PASS	missense_variant	MODERATE	FAM120B	101083940	transcript	XM_019831537.1	protein_coding	1	c.1250C>T	p.Thr417Ile
chrB2	155020669	A	G	PASS	missense_variant	MODERATE	FAM120B	101083940	transcript	XM_019831534.2	protein_coding	2	c.1381A>G	p.Met461Val
chrB2	155020669	A	G	PASS	missense_variant	MODERATE	FAM120B	101083940	transcript	XM_019831538.1	protein_coding	2	c.1279A>G	p.Met427Val
chrB2	155020669	A	G	PASS	missense_variant	MODERATE	FAM120B	101083940	transcript	XM_023254630.1	protein_coding	2	c.1381A>G	p.Met461Val
chrB2	155020669	A	G	PASS	missense_variant	MODERATE	FAM120B	101083940	transcript	XM_019831536.2	protein_coding	2	c.1381A>G	p.Met461Val
chrB2	155020669	A	G	PASS	missense_variant	MODERATE	FAM120B	101083940	transcript	XM_019831542.2	protein_coding	2	c.1381A>G	p.Met461Val
chrB2	155020669	A	G	PASS	missense_variant	MODERATE	FAM120B	101083940	transcript	XM_019831540.2	protein_coding	2	c.1381A>G	p.Met461Val
chrB2	155020669	A	G	PASS	missense_variant	MODERATE	FAM120B	101083940	transcript	XM_019831535.2	protein_coding	2	c.1381A>G	p.Met461Val
chrB2	155020669	A	G	PASS	missense_variant	MODERATE	FAM120B	101083940	transcript	XM_023254629.1	protein_coding	2	c.1381A>G	p.Met461Val
chrB2	155020669	A	G	PASS	missense_variant	MODERATE	FAM120B	101083940	transcript	XM_023254626.1	protein_coding	2	c.1381A>G	p.Met461Val
chrB2	155020669	A	G	PASS	missense_variant	MODERATE	FAM120B	101083940	transcript	XM_019831541.2	protein_coding	2	c.1381A>G	p.Met461Val
chrB2	155020669	A	G	PASS	missense_variant	MODERATE	FAM120B	101083940	transcript	XM_023254627.1	protein_coding	2	c.1381A>G	p.Met461Val
chrB2	155020669	A	G	PASS	missense_variant	MODERATE	FAM120B	101083940	transcript	XM_023254628.1	protein_coding	2	c.1381A>G	p.Met461Val
chrB2	155020669	A	G	PASS	missense_variant	MODERATE	FAM120B	101083940	transcript	XM_019831537.1	protein_coding	1	c.1279A>G	p.Met427Val
chrB2	155020687	T	A	PASS	missense_variant	MODERATE	FAM120B	101083940	transcript	XM_019831534.2	protein_coding	2	c.1399T>A	p.Ser467Thr
chrB2	155020687	T	A	PASS	missense_variant	MODERATE	FAM120B	101083940	transcript	XM_019831538.1	protein_coding	2	c.1297T>A	p.Ser433Thr
chrB2	155020687	T	A	PASS	missense_variant	MODERATE	FAM120B	101083940	transcript	XM_023254630.1	protein_coding	2	c.1399T>A	p.Ser467Thr
chrB2	155020687	T	A	PASS	missense_variant	MODERATE	FAM120B	101083940	transcript	XM_019831536.2	protein_coding	2	c.1399T>A	p.Ser467Thr
chrB2	155020687	T	A	PASS	missense_variant	MODERATE	FAM120B	101083940	transcript	XM_019831542.2	protein_coding	2	c.1399T>A	p.Ser467Thr
chrB2	155020687	T	A	PASS	missense_variant	MODERATE	FAM120B	101083940	transcript	XM_019831540.2	protein_coding	2	c.1399T>A	p.Ser467Thr
chrB2	155020687	T	A	PASS	missense_variant	MODERATE	FAM120B	101083940	transcript	XM_019831535.2	protein_coding	2	c.1399T>A	p.Ser467Thr
chrB2	155020687	T	A	PASS	missense_variant	MODERATE	FAM120B	101083940	transcript	XM_023254629.1	protein_coding	2	c.1399T>A	p.Ser467Thr
chrB2	155020687	T	A	PASS	missense_variant	MODERATE	FAM120B	101083940	transcript	XM_023254626.1	protein_coding	2	c.1399T>A	p.Ser467Thr
chrB2	155020687	T	A	PASS	missense_variant	MODERATE	FAM120B	101083940	transcript	XM_019831541.2	protein_coding	2	c.1399T>A	p.Ser467Thr
chrB2	155020687	T	A	PASS	missense_variant	MODERATE	FAM120B	101083940	transcript	XM_023254627.1	protein_coding	2	c.1399T>A	p.Ser467Thr
chrB2	155020687	T	A	PASS	missense_variant	MODERATE	FAM120B	101083940	transcript	XM_023254628.1	protein_coding	2	c.1399T>A	p.Ser467Thr
chrB2	155020687	T	A	PASS	missense_variant	MODERATE	FAM120B	101083940	transcript	XM_019831537.1	protein_coding	1	c.1297T>A	p.Ser433Thr
chrB2	155020702	T	C	PASS	missense_variant	MODERATE	FAM120B	101083940	transcript	XM_019831534.2	protein_coding	2	c.1414T>C	p.Phe472Leu
chrB2	155020702	T	C	PASS	missense_variant	MODERATE	FAM120B	101083940	transcript	XM_019831538.1	protein_coding	2	c.1312T>C	p.Phe438Leu
chrB2	155020702	T	C	PASS	missense_variant	MODERATE	FAM120B	101083940	transcript	XM_023254630.1	protein_coding	2	c.1414T>C	p.Phe472Leu
chrB2	155020702	T	C	PASS	missense_variant	MODERATE	FAM120B	101083940	transcript	XM_019831536.2	protein_coding	2	c.1414T>C	p.Phe472Leu
chrB2	155020702	T	C	PASS	missense_variant	MODERATE	FAM120B	101083940	transcript	XM_019831542.2	protein_coding	2	c.1414T>C	p.Phe472Leu
chrB2	155020702	T	C	PASS	missense_variant	MODERATE	FAM120B	101083940	transcript	XM_019831540.2	protein_coding	2	c.1414T>C	p.Phe472Leu
chrB2	155020702	T	C	PASS	missense_variant	MODERATE	FAM120B	101083940	transcript	XM_019831535.2	protein_coding	2	c.1414T>C	p.Phe472Leu
chrB2	155020702	T	C	PASS	missense_variant	MODERATE	FAM120B	101083940	transcript	XM_023254629.1	protein_coding	2	c.1414T>C	p.Phe472Leu
chrB2	155020702	T	C	PASS	missense_variant	MODERATE	FAM120B	101083940	transcript	XM_023254626.1	protein_coding	2	c.1414T>C	p.Phe472Leu
chrB2	155020702	T	C	PASS	missense_variant	MODERATE	FAM120B	101083940	transcript	XM_019831541.2	protein_coding	2	c.1414T>C	p.Phe472Leu
chrB2	155020702	T	C	PASS	missense_variant	MODERATE	FAM120B	101083940	transcript	XM_023254627.1	protein_coding	2	c.1414T>C	p.Phe472Leu
chrB2	155020702	T	C	PASS	missense_variant	MODERATE	FAM120B	101083940	transcript	XM_023254628.1	protein_coding	2	c.1414T>C	p.Phe472Leu
chrB2	155020702	T	C	PASS	missense_variant	MODERATE	FAM120B	101083940	transcript	XM_019831537.1	protein_coding	1	c.1312T>C	p.Phe438Leu
chrB2	155020871	GGCAAGGAGTTCCTATGTGTACATACTCTGAATCCAA	G	PASS	disruptive_inframe_deletion	MODERATE	FAM120B	101083940	transcript	XM_019831534.2	protein_coding	2	c.1596_1631delTATGTGTACATACTCTGAATCCAAGCAAGGAGTTCC	p.Met533_Pro544del
chrB2	155020871	GGCAAGGAGTTCCTATGTGTACATACTCTGAATCCAA	G	PASS	disruptive_inframe_deletion	MODERATE	FAM120B	101083940	transcript	XM_019831538.1	protein_coding	2	c.1494_1529delTATGTGTACATACTCTGAATCCAAGCAAGGAGTTCC	p.Met499_Pro510del
chrB2	155020871	GGCAAGGAGTTCCTATGTGTACATACTCTGAATCCAA	G	PASS	disruptive_inframe_deletion	MODERATE	FAM120B	101083940	transcript	XM_023254630.1	protein_coding	2	c.1596_1631delTATGTGTACATACTCTGAATCCAAGCAAGGAGTTCC	p.Met533_Pro544del
chrB2	155020871	GGCAAGGAGTTCCTATGTGTACATACTCTGAATCCAA	G	PASS	disruptive_inframe_deletion	MODERATE	FAM120B	101083940	transcript	XM_019831536.2	protein_coding	2	c.1596_1631delTATGTGTACATACTCTGAATCCAAGCAAGGAGTTCC	p.Met533_Pro544del
chrB2	155020871	GGCAAGGAGTTCCTATGTGTACATACTCTGAATCCAA	G	PASS	disruptive_inframe_deletion	MODERATE	FAM120B	101083940	transcript	XM_019831542.2	protein_coding	2	c.1596_1631delTATGTGTACATACTCTGAATCCAAGCAAGGAGTTCC	p.Met533_Pro544del
chrB2	155020871	GGCAAGGAGTTCCTATGTGTACATACTCTGAATCCAA	G	PASS	disruptive_inframe_deletion	MODERATE	FAM120B	101083940	transcript	XM_019831540.2	protein_coding	2	c.1596_1631delTATGTGTACATACTCTGAATCCAAGCAAGGAGTTCC	p.Met533_Pro544del
chrB2	155020871	GGCAAGGAGTTCCTATGTGTACATACTCTGAATCCAA	G	PASS	disruptive_inframe_deletion	MODERATE	FAM120B	101083940	transcript	XM_019831535.2	protein_coding	2	c.1596_1631delTATGTGTACATACTCTGAATCCAAGCAAGGAGTTCC	p.Met533_Pro544del
chrB2	155020871	GGCAAGGAGTTCCTATGTGTACATACTCTGAATCCAA	G	PASS	disruptive_inframe_deletion	MODERATE	FAM120B	101083940	transcript	XM_023254629.1	protein_coding	2	c.1596_1631delTATGTGTACATACTCTGAATCCAAGCAAGGAGTTCC	p.Met533_Pro544del
chrB2	155020871	GGCAAGGAGTTCCTATGTGTACATACTCTGAATCCAA	G	PASS	disruptive_inframe_deletion	MODERATE	FAM120B	101083940	transcript	XM_023254626.1	protein_coding	2	c.1596_1631delTATGTGTACATACTCTGAATCCAAGCAAGGAGTTCC	p.Met533_Pro544del
chrB2	155020871	GGCAAGGAGTTCCTATGTGTACATACTCTGAATCCAA	G	PASS	disruptive_inframe_deletion	MODERATE	FAM120B	101083940	transcript	XM_019831541.2	protein_coding	2	c.1596_1631delTATGTGTACATACTCTGAATCCAAGCAAGGAGTTCC	p.Met533_Pro544del
chrB2	155020871	GGCAAGGAGTTCCTATGTGTACATACTCTGAATCCAA	G	PASS	disruptive_inframe_deletion	MODERATE	FAM120B	101083940	transcript	XM_023254627.1	protein_coding	2	c.1596_1631delTATGTGTACATACTCTGAATCCAAGCAAGGAGTTCC	p.Met533_Pro544del
chrB2	155020871	GGCAAGGAGTTCCTATGTGTACATACTCTGAATCCAA	G	PASS	disruptive_inframe_deletion	MODERATE	FAM120B	101083940	transcript	XM_023254628.1	protein_coding	2	c.1596_1631delTATGTGTACATACTCTGAATCCAAGCAAGGAGTTCC	p.Met533_Pro544del
chrB2	155020871	GGCAAGGAGTTCCTATGTGTACATACTCTGAATCCAA	G	PASS	disruptive_inframe_deletion	MODERATE	FAM120B	101083940	transcript	XM_019831537.1	protein_coding	1	c.1494_1529delTATGTGTACATACTCTGAATCCAAGCAAGGAGTTCC	p.Met499_Pro510del
chrB2	155021049	G	C	PASS	missense_variant	MODERATE	FAM120B	101083940	transcript	XM_019831534.2	protein_coding	2	c.1761G>C	p.Met587Ile
chrB2	155021049	G	C	PASS	missense_variant	MODERATE	FAM120B	101083940	transcript	XM_019831538.1	protein_coding	2	c.1659G>C	p.Met553Ile
chrB2	155021049	G	C	PASS	missense_variant	MODERATE	FAM120B	101083940	transcript	XM_023254630.1	protein_coding	2	c.1761G>C	p.Met587Ile
chrB2	155021049	G	C	PASS	missense_variant	MODERATE	FAM120B	101083940	transcript	XM_019831536.2	protein_coding	2	c.1761G>C	p.Met587Ile
chrB2	155021049	G	C	PASS	missense_variant	MODERATE	FAM120B	101083940	transcript	XM_019831542.2	protein_coding	2	c.1761G>C	p.Met587Ile
chrB2	155021049	G	C	PASS	missense_variant	MODERATE	FAM120B	101083940	transcript	XM_019831540.2	protein_coding	2	c.1761G>C	p.Met587Ile
chrB2	155021049	G	C	PASS	missense_variant	MODERATE	FAM120B	101083940	transcript	XM_019831535.2	protein_coding	2	c.1761G>C	p.Met587Ile
chrB2	155021049	G	C	PASS	missense_variant	MODERATE	FAM120B	101083940	transcript	XM_023254629.1	protein_coding	2	c.1761G>C	p.Met587Ile
chrB2	155021049	G	C	PASS	missense_variant	MODERATE	FAM120B	101083940	transcript	XM_023254626.1	protein_coding	2	c.1761G>C	p.Met587Ile
chrB2	155021049	G	C	PASS	missense_variant	MODERATE	FAM120B	101083940	transcript	XM_019831541.2	protein_coding	2	c.1761G>C	p.Met587Ile
chrB2	155021049	G	C	PASS	missense_variant	MODERATE	FAM120B	101083940	transcript	XM_023254627.1	protein_coding	2	c.1761G>C	p.Met587Ile
chrB2	155021049	G	C	PASS	missense_variant	MODERATE	FAM120B	101083940	transcript	XM_023254628.1	protein_coding	2	c.1761G>C	p.Met587Ile
chrB2	155021049	G	C	PASS	missense_variant	MODERATE	FAM120B	101083940	transcript	XM_019831537.1	protein_coding	1	c.1659G>C	p.Met553Ile
chrB2	155064667	C	A	PASS	missense_variant	MODERATE	FAM120B	101083940	transcript	XM_019831542.2	protein_coding	7	c.2371C>A	p.Leu791Met
chrB2	155073917	A	G	PASS	missense_variant	MODERATE	FAM120B	101083940	transcript	XM_019831534.2	protein_coding	8	c.2614A>G	p.Met872Val
chrB2	155073917	A	G	PASS	missense_variant	MODERATE	FAM120B	101083940	transcript	XM_019831538.1	protein_coding	8	c.2512A>G	p.Met838Val
chrB2	155073917	A	G	PASS	missense_variant	MODERATE	FAM120B	101083940	transcript	XM_019831536.2	protein_coding	7	c.2512A>G	p.Met838Val
chrB2	155073917	A	G	PASS	missense_variant	MODERATE	FAM120B	101083940	transcript	XM_019831535.2	protein_coding	8	c.2614A>G	p.Met872Val
chrB2	155073917	A	G	PASS	missense_variant	MODERATE	FAM120B	101083940	transcript	XM_023254626.1	protein_coding	8	c.2614A>G	p.Met872Val
chrB2	155073917	A	G	PASS	missense_variant	MODERATE	FAM120B	101083940	transcript	XM_023254627.1	protein_coding	8	c.2614A>G	p.Met872Val
chrB2	155073917	A	G	PASS	missense_variant	MODERATE	FAM120B	101083940	transcript	XM_023254628.1	protein_coding	8	c.2614A>G	p.Met872Val
chrB2	155073917	A	G	PASS	missense_variant	MODERATE	FAM120B	101083940	transcript	XM_019831537.1	protein_coding	7	c.2512A>G	p.Met838Val
chrB2	155073917	A	G	PASS	missense_variant	MODERATE	FAM120B	101083940	transcript	XM_019831545.1	protein_coding	7	c.760A>G	p.Met254Val
chrB2	155093151	A	G	PASS	missense_variant	MODERATE	FAM120B	101083940	transcript	XM_019831534.2	protein_coding	11	c.2929A>G	p.Ser977Gly
chrB2	155093151	A	G	PASS	missense_variant	MODERATE	FAM120B	101083940	transcript	XM_019831538.1	protein_coding	11	c.2827A>G	p.Ser943Gly
chrB2	155093151	A	G	PASS	missense_variant	MODERATE	FAM120B	101083940	transcript	XM_019831536.2	protein_coding	10	c.2827A>G	p.Ser943Gly
chrB2	155093151	A	G	PASS	missense_variant	MODERATE	FAM120B	101083940	transcript	XM_019831535.2	protein_coding	10	c.2836A>G	p.Ser946Gly
chrB2	155093151	A	G	PASS	missense_variant	MODERATE	FAM120B	101083940	transcript	XM_023254626.1	protein_coding	11	c.2929A>G	p.Ser977Gly
chrB2	155093151	A	G	PASS	missense_variant	MODERATE	FAM120B	101083940	transcript	XM_019831545.1	protein_coding	10	c.1075A>G	p.Ser359Gly
chrB2	155177160	C	T	PASS	splice_donor_variant&intron_variant	HIGH	LOC102900422	102900422	transcript	XR_440397.3	pseudogene	1	n.1099+1G>A
chrB2	155197854	T	C	PASS	missense_variant	MODERATE	PSMB1	101101060	transcript	XM_003986715.4	protein_coding	1	c.61A>G	p.Ser21Gly
chrB2	155197871	A	C	PASS	missense_variant	MODERATE	PSMB1	101101060	transcript	XM_003986715.4	protein_coding	1	c.44T>G	p.Leu15Arg
chrB2	155237935	T	C	PASS	missense_variant	MODERATE	PDCD2	101084453	transcript	XM_023254632.1	protein_coding	2	c.358A>G	p.Thr120Ala
chrB3	1361735	G	A	PASS	missense_variant	MODERATE	LOC111560765	111560765	transcript	XM_023254797.1	protein_coding	1	c.160C>T	p.Arg54Cys
chrB3	1642473	G	A	PASS	missense_variant	MODERATE	LOC111560762	111560762	transcript	XM_023254765.1	protein_coding	1	c.790C>T	p.Arg264Cys
chrB3	65201382	C	G	PASS	missense_variant	MODERATE	EIF2AK4	101087928	transcript	XM_023255502.1	protein_coding	12	c.2027G>C	p.Gly676Ala
chrB3	65201382	C	G	PASS	missense_variant	MODERATE	EIF2AK4	101087928	transcript	XM_023255506.1	protein_coding	11	c.1691G>C	p.Gly564Ala
chrB3	65201382	C	G	PASS	missense_variant	MODERATE	EIF2AK4	101087928	transcript	XM_023255504.1	protein_coding	12	c.1910G>C	p.Gly637Ala
chrB3	65201382	C	G	PASS	missense_variant	MODERATE	EIF2AK4	101087928	transcript	XM_023255507.1	protein_coding	11	c.1691G>C	p.Gly564Ala
chrB3	65201382	C	G	PASS	missense_variant	MODERATE	EIF2AK4	101087928	transcript	XM_023255505.1	protein_coding	11	c.1691G>C	p.Gly564Ala
chrB3	65201382	C	G	PASS	missense_variant	MODERATE	EIF2AK4	101087928	transcript	XM_023255503.1	protein_coding	12	c.2027G>C	p.Gly676Ala
chrB3	65201382	C	G	PASS	missense_variant	MODERATE	EIF2AK4	101087928	transcript	XM_023255508.1	protein_coding	12	c.2027G>C	p.Gly676Ala
chrB3	65211514	C	T	PASS	missense_variant	MODERATE	EIF2AK4	101087928	transcript	XM_023255502.1	protein_coding	9	c.1489G>A	p.Gly497Arg
chrB3	65211514	C	T	PASS	missense_variant	MODERATE	EIF2AK4	101087928	transcript	XM_023255506.1	protein_coding	8	c.1153G>A	p.Gly385Arg
chrB3	65211514	C	T	PASS	missense_variant	MODERATE	EIF2AK4	101087928	transcript	XM_023255504.1	protein_coding	9	c.1372G>A	p.Gly458Arg
chrB3	65211514	C	T	PASS	missense_variant	MODERATE	EIF2AK4	101087928	transcript	XM_023255507.1	protein_coding	8	c.1153G>A	p.Gly385Arg
chrB3	65211514	C	T	PASS	missense_variant	MODERATE	EIF2AK4	101087928	transcript	XM_023255505.1	protein_coding	8	c.1153G>A	p.Gly385Arg
chrB3	65211514	C	T	PASS	missense_variant	MODERATE	EIF2AK4	101087928	transcript	XM_023255503.1	protein_coding	9	c.1489G>A	p.Gly497Arg
chrB3	65211514	C	T	PASS	missense_variant	MODERATE	EIF2AK4	101087928	transcript	XM_023255508.1	protein_coding	9	c.1489G>A	p.Gly497Arg
chrB3	65211621	T	C	PASS	missense_variant	MODERATE	EIF2AK4	101087928	transcript	XM_023255502.1	protein_coding	9	c.1382A>G	p.Asn461Ser
chrB3	65211621	T	C	PASS	missense_variant	MODERATE	EIF2AK4	101087928	transcript	XM_023255506.1	protein_coding	8	c.1046A>G	p.Asn349Ser
chrB3	65211621	T	C	PASS	missense_variant	MODERATE	EIF2AK4	101087928	transcript	XM_023255504.1	protein_coding	9	c.1265A>G	p.Asn422Ser
chrB3	65211621	T	C	PASS	missense_variant	MODERATE	EIF2AK4	101087928	transcript	XM_023255507.1	protein_coding	8	c.1046A>G	p.Asn349Ser
chrB3	65211621	T	C	PASS	missense_variant	MODERATE	EIF2AK4	101087928	transcript	XM_023255505.1	protein_coding	8	c.1046A>G	p.Asn349Ser
chrB3	65211621	T	C	PASS	missense_variant	MODERATE	EIF2AK4	101087928	transcript	XM_023255503.1	protein_coding	9	c.1382A>G	p.Asn461Ser
chrB3	65211621	T	C	PASS	missense_variant	MODERATE	EIF2AK4	101087928	transcript	XM_023255508.1	protein_coding	9	c.1382A>G	p.Asn461Ser
chrB3	65219860	G	C	PASS	missense_variant	MODERATE	EIF2AK4	101087928	transcript	XM_023255502.1	protein_coding	6	c.635C>G	p.Ser212Cys
chrB3	65219860	G	C	PASS	missense_variant	MODERATE	EIF2AK4	101087928	transcript	XM_023255506.1	protein_coding	5	c.299C>G	p.Ser100Cys
chrB3	65219860	G	C	PASS	missense_variant	MODERATE	EIF2AK4	101087928	transcript	XM_023255504.1	protein_coding	6	c.518C>G	p.Ser173Cys
chrB3	65219860	G	C	PASS	missense_variant	MODERATE	EIF2AK4	101087928	transcript	XM_023255507.1	protein_coding	5	c.299C>G	p.Ser100Cys
chrB3	65219860	G	C	PASS	missense_variant	MODERATE	EIF2AK4	101087928	transcript	XM_023255505.1	protein_coding	5	c.299C>G	p.Ser100Cys
chrB3	65219860	G	C	PASS	missense_variant	MODERATE	EIF2AK4	101087928	transcript	XM_023255503.1	protein_coding	6	c.635C>G	p.Ser212Cys
chrB3	65219860	G	C	PASS	missense_variant	MODERATE	EIF2AK4	101087928	transcript	XM_023255508.1	protein_coding	6	c.635C>G	p.Ser212Cys
chrB3	65392696	T	C	PASS	missense_variant	MODERATE	GPR176	101092188	transcript	XM_003987283.5	protein_coding	3	c.670T>C	p.Phe224Leu
chrB3	65393294	C	A	PASS	missense_variant	MODERATE	GPR176	101092188	transcript	XM_003987283.5	protein_coding	3	c.1268C>A	p.Pro423Gln
chrB3	65393317	C	G	PASS	missense_variant	MODERATE	GPR176	101092188	transcript	XM_003987283.5	protein_coding	3	c.1291C>G	p.Leu431Val
chrB3	65413110	A	G	PASS	missense_variant	MODERATE	FSIP1	101088168	transcript	XM_006932677.4	protein_coding	2	c.20A>G	p.Asn7Ser
chrB3	65420554	A	G	PASS	missense_variant	MODERATE	FSIP1	101088168	transcript	XM_006932677.4	protein_coding	3	c.224A>G	p.Asn75Ser
chrB3	65420602	C	T	PASS	missense_variant	MODERATE	FSIP1	101088168	transcript	XM_006932677.4	protein_coding	3	c.272C>T	p.Pro91Leu
chrB3	65452444	A	G	PASS	missense_variant	MODERATE	FSIP1	101088168	transcript	XM_006932677.4	protein_coding	6	c.653A>G	p.Asn218Ser
chrB3	65464466	A	G	PASS	missense_variant	MODERATE	FSIP1	101088168	transcript	XM_006932677.4	protein_coding	9	c.902A>G	p.Gln301Arg
chrB3	65464577	C	T	PASS	missense_variant	MODERATE	FSIP1	101088168	transcript	XM_006932677.4	protein_coding	9	c.1013C>T	p.Ala338Val
chrB3	73479245	A	G	PASS	missense_variant	MODERATE	LOC101090696	101090696	transcript	XM_011283351.2	protein_coding	2	c.173T>C	p.Ile58Thr
chrB3	73542869	G	A	PASS	missense_variant	MODERATE	TEP1	101091203	transcript	XM_023255550.1	protein_coding	34	c.4960C>T	p.Leu1654Phe
chrB3	73542869	G	A	PASS	missense_variant	MODERATE	TEP1	101091203	transcript	XM_023255557.1	protein_coding	33	c.4279C>T	p.Leu1427Phe
chrB3	73542869	G	A	PASS	missense_variant	MODERATE	TEP1	101091203	transcript	XM_023255552.1	protein_coding	34	c.4960C>T	p.Leu1654Phe
chrB3	73542869	G	A	PASS	missense_variant	MODERATE	TEP1	101091203	transcript	XM_023255551.1	protein_coding	34	c.4960C>T	p.Leu1654Phe
chrB3	73542869	G	A	PASS	missense_variant	MODERATE	TEP1	101091203	transcript	XM_023255554.1	protein_coding	34	c.4960C>T	p.Leu1654Phe
chrB3	73542869	G	A	PASS	missense_variant	MODERATE	TEP1	101091203	transcript	XM_023255553.1	protein_coding	34	c.4960C>T	p.Leu1654Phe
chrB3	73542869	G	A	PASS	missense_variant	MODERATE	TEP1	101091203	transcript	XM_023255555.1	protein_coding	34	c.4960C>T	p.Leu1654Phe
chrB3	73542869	G	A	PASS	missense_variant	MODERATE	TEP1	101091203	transcript	XM_023255559.1	protein_coding	34	c.4960C>T	p.Leu1654Phe
chrB3	73542869	G	A	PASS	missense_variant	MODERATE	TEP1	101091203	transcript	XM_023255558.1	protein_coding	34	c.4960C>T	p.Leu1654Phe
chrB3	73542869	G	A	PASS	missense_variant	MODERATE	TEP1	101091203	transcript	XM_023255561.1	protein_coding	34	c.4960C>T	p.Leu1654Phe
chrB3	73542869	G	A	PASS	missense_variant	MODERATE	TEP1	101091203	transcript	XM_023255560.1	protein_coding	34	c.4960C>T	p.Leu1654Phe
chrB3	73542869	G	A	PASS	missense_variant	MODERATE	TEP1	101091203	transcript	XM_023255562.1	protein_coding	34	c.4960C>T	p.Leu1654Phe
chrB3	109983585	G	A	PASS	missense_variant	MODERATE	SLC38A6	101082161	transcript	XM_019833092.2	protein_coding	16	c.1372G>A	p.Val458Met
chrB3	109983585	G	A	PASS	missense_variant	MODERATE	SLC38A6	101082161	transcript	XM_019833093.2	protein_coding	16	c.1369G>A	p.Val457Met
chrB3	109983585	G	A	PASS	missense_variant	MODERATE	SLC38A6	101082161	transcript	XM_019833095.2	protein_coding	15	c.1078G>A	p.Val360Met
chrB3	113237613	A	T	PASS	missense_variant	MODERATE	PLEKHG3	101088250	transcript	XM_011283267.2	protein_coding	17	c.1715A>T	p.Glu572Val
chrB3	113237613	A	T	PASS	missense_variant	MODERATE	PLEKHG3	101088250	transcript	XM_023255771.1	protein_coding	17	c.1715A>T	p.Glu572Val
chrB3	113237613	A	T	PASS	missense_variant	MODERATE	PLEKHG3	101088250	transcript	XM_011283266.2	protein_coding	16	c.1712A>T	p.Glu571Val
chrB3	113237613	A	T	PASS	missense_variant	MODERATE	PLEKHG3	101088250	transcript	XM_011283268.2	protein_coding	15	c.1625A>T	p.Glu542Val
chrB3	113237613	A	T	PASS	missense_variant	MODERATE	PLEKHG3	101088250	transcript	XM_011283269.2	protein_coding	15	c.1622A>T	p.Glu541Val
chrB3	116934390	G	A	PASS	missense_variant	MODERATE	ACTN1	101097986	transcript	XM_019833192.2	protein_coding	1	c.62C>T	p.Ala21Val
chrB3	116934390	G	A	PASS	missense_variant	MODERATE	ACTN1	101097986	transcript	XM_019833194.2	protein_coding	1	c.62C>T	p.Ala21Val
chrB3	116934390	G	A	PASS	missense_variant	MODERATE	ACTN1	101097986	transcript	XM_019833195.1	protein_coding	1	c.62C>T	p.Ala21Val
chrB3	118699013	G	A	PASS	missense_variant	MODERATE	PCNX1	105260647	transcript	XM_023255794.1	protein_coding	6	c.2134G>A	p.Glu712Lys
chrB3	118699013	G	A	PASS	missense_variant	MODERATE	PCNX1	105260647	transcript	XM_023255795.1	protein_coding	6	c.2134G>A	p.Glu712Lys
chrB3	118699013	G	A	PASS	missense_variant	MODERATE	PCNX1	105260647	transcript	XM_023255796.1	protein_coding	6	c.2134G>A	p.Glu712Lys
chrB3	118699013	G	A	PASS	missense_variant	MODERATE	PCNX1	105260647	transcript	XM_023255797.1	protein_coding	6	c.2134G>A	p.Glu712Lys
chrB3	118699013	G	A	PASS	missense_variant	MODERATE	PCNX1	105260647	transcript	XM_023255799.1	protein_coding	6	c.2134G>A	p.Glu712Lys
chrB3	118699013	G	A	PASS	missense_variant	MODERATE	PCNX1	105260647	transcript	XM_023255798.1	protein_coding	6	c.2134G>A	p.Glu712Lys
chrB3	118699013	G	A	PASS	missense_variant	MODERATE	PCNX1	105260647	transcript	XM_023255800.1	protein_coding	5	c.1750G>A	p.Glu584Lys
chrB3	144796416	CA	C	QD2	frameshift_variant	HIGH	EVL	101080297	transcript	XM_023256220.1	protein_coding	6	c.684delA	p.Pro230fs
chrB3	144796416	CA	C	QD2	frameshift_variant	HIGH	EVL	101080297	transcript	XM_019833629.1	protein_coding	6	c.639delA	p.Pro215fs
chrB3	144796416	CA	C	QD2	frameshift_variant	HIGH	EVL	101080297	transcript	XM_011283523.3	protein_coding	6	c.573delA	p.Pro193fs
chrB3	144796416	CA	C	QD2	frameshift_variant	HIGH	EVL	101080297	transcript	XM_023256219.1	protein_coding	6	c.600delA	p.Pro202fs
chrB3	144796416	CA	C	QD2	frameshift_variant	HIGH	EVL	101080297	transcript	XM_023256221.1	protein_coding	6	c.600delA	p.Pro202fs
chrB3	144796416	CA	C	QD2	frameshift_variant	HIGH	EVL	101080297	transcript	XM_003988023.4	protein_coding	6	c.561delA	p.Pro189fs
chrB3	148843841	G	T	PASS	missense_variant	MODERATE	AHNAK2	105259630	transcript	XM_023256202.1	protein_coding	7	c.2062C>A	p.Leu688Met
chrB3	148843856	T	C	PASS	missense_variant	MODERATE	AHNAK2	105259630	transcript	XM_023256202.1	protein_coding	7	c.2047A>G	p.Thr683Ala
chrB4	993345	A	G	PASS	missense_variant	MODERATE	LARP4B	101095267	transcript	XM_011283588.3	protein_coding	3	c.1384T>C	p.Ser462Pro
chrB4	1005338	T	C	PASS	missense_variant	MODERATE	LARP4B	101095267	transcript	XM_011283589.3	protein_coding	3	c.94A>G	p.Ile32Val
chrB4	1005338	T	C	PASS	missense_variant	MODERATE	LARP4B	101095267	transcript	XM_023256269.1	protein_coding	3	c.94A>G	p.Ile32Val
chrB4	25338865	G	A	PASS	missense_variant	MODERATE	LOC105260720	105260720	transcript	XM_019835807.2	protein_coding	3	c.2222C>T	p.Ala741Val
chrB4	25338898	C	T	PASS	missense_variant	MODERATE	LOC105260720	105260720	transcript	XM_019835807.2	protein_coding	3	c.2189G>A	p.Arg730Gln
chrB4	35252132	T	A	PASS	missense_variant&splice_region_variant	MODERATE	IL17RA	101095588	transcript	XM_023256595.1	protein_coding	11	c.1051A>T	p.Arg351Trp
chrB4	35252132	T	A	PASS	missense_variant&splice_region_variant	MODERATE	IL17RA	101095588	transcript	XM_023256596.1	protein_coding	10	c.1039A>T	p.Arg347Trp
chrB4	47963913	CTG	C	PASS	frameshift_variant	HIGH	ETV6	101081738	transcript	XM_023256781.1	protein_coding	6	c.1280_1281delTG	p.Leu427fs
chrB4	47963913	CTG	C	PASS	frameshift_variant	HIGH	ETV6	101081738	transcript	XM_023256782.1	protein_coding	6	c.1277_1278delTG	p.Leu426fs
chrB4	48114277	T	A	PASS	missense_variant	MODERATE	BCL2L14	101091028	transcript	XM_023256783.1	protein_coding	2	c.25T>A	p.Ser9Thr
chrB4	48135871	C	T	PASS	missense_variant	MODERATE	BCL2L14	101091028	transcript	XM_019834525.2	protein_coding	2	c.253C>T	p.Arg85Trp
chrB4	48135871	C	T	PASS	missense_variant	MODERATE	BCL2L14	101091028	transcript	XM_019834526.1	protein_coding	3	c.214C>T	p.Arg72Trp
chrB4	48135871	C	T	PASS	missense_variant	MODERATE	BCL2L14	101091028	transcript	XM_023256783.1	protein_coding	3	c.253C>T	p.Arg85Trp
chrB4	48135871	C	T	PASS	missense_variant	MODERATE	BCL2L14	101091028	transcript	XM_003988422.4	protein_coding	2	c.214C>T	p.Arg72Trp
chrB4	48140657	G	A	PASS	missense_variant	MODERATE	BCL2L14	101091028	transcript	XM_019834525.2	protein_coding	3	c.550G>A	p.Gly184Ser
chrB4	48140657	G	A	PASS	missense_variant	MODERATE	BCL2L14	101091028	transcript	XM_019834526.1	protein_coding	4	c.511G>A	p.Gly171Ser
chrB4	48140657	G	A	PASS	missense_variant	MODERATE	BCL2L14	101091028	transcript	XM_023256783.1	protein_coding	4	c.550G>A	p.Gly184Ser
chrB4	48140657	G	A	PASS	missense_variant	MODERATE	BCL2L14	101091028	transcript	XM_003988422.4	protein_coding	3	c.511G>A	p.Gly171Ser
chrB4	48140673	T	G	PASS	missense_variant	MODERATE	BCL2L14	101091028	transcript	XM_019834525.2	protein_coding	3	c.566T>G	p.Leu189Arg
chrB4	48140673	T	G	PASS	missense_variant	MODERATE	BCL2L14	101091028	transcript	XM_019834526.1	protein_coding	4	c.527T>G	p.Leu176Arg
chrB4	48140673	T	G	PASS	missense_variant	MODERATE	BCL2L14	101091028	transcript	XM_023256783.1	protein_coding	4	c.566T>G	p.Leu189Arg
chrB4	48140673	T	G	PASS	missense_variant	MODERATE	BCL2L14	101091028	transcript	XM_003988422.4	protein_coding	3	c.527T>G	p.Leu176Arg
chrB4	48140700	T	C	PASS	missense_variant	MODERATE	BCL2L14	101091028	transcript	XM_019834525.2	protein_coding	3	c.593T>C	p.Leu198Pro
chrB4	48140700	T	C	PASS	missense_variant	MODERATE	BCL2L14	101091028	transcript	XM_019834526.1	protein_coding	4	c.554T>C	p.Leu185Pro
chrB4	48140700	T	C	PASS	missense_variant	MODERATE	BCL2L14	101091028	transcript	XM_023256783.1	protein_coding	4	c.593T>C	p.Leu198Pro
chrB4	48140700	T	C	PASS	missense_variant	MODERATE	BCL2L14	101091028	transcript	XM_003988422.4	protein_coding	3	c.554T>C	p.Leu185Pro
chrB4	48144972	C	G	PASS	missense_variant	MODERATE	BCL2L14	101091028	transcript	XM_019834525.2	protein_coding	5	c.726C>G	p.Asp242Glu
chrB4	48144972	C	G	PASS	missense_variant	MODERATE	BCL2L14	101091028	transcript	XM_019834526.1	protein_coding	6	c.687C>G	p.Asp229Glu
chrB4	48144972	C	G	PASS	missense_variant	MODERATE	BCL2L14	101091028	transcript	XM_023256783.1	protein_coding	6	c.726C>G	p.Asp242Glu
chrB4	48144972	C	G	PASS	missense_variant	MODERATE	BCL2L14	101091028	transcript	XM_003988422.4	protein_coding	5	c.687C>G	p.Asp229Glu
chrB4	48382774	T	C	PASS	missense_variant	MODERATE	MANSC1	101091288	transcript	XM_003988423.5	protein_coding	5	c.1189A>G	p.Ile397Val
chrB4	48382899	T	G	PASS	missense_variant	MODERATE	MANSC1	101091288	transcript	XM_003988423.5	protein_coding	5	c.1064A>C	p.Asn355Thr
chrB4	48382953	A	G	PASS	missense_variant	MODERATE	MANSC1	101091288	transcript	XM_003988423.5	protein_coding	5	c.1010T>C	p.Val337Ala
chrB4	48382959	C	T	PASS	missense_variant	MODERATE	MANSC1	101091288	transcript	XM_003988423.5	protein_coding	5	c.1004G>A	p.Ser335Asn
chrB4	48382974	G	C	PASS	missense_variant	MODERATE	MANSC1	101091288	transcript	XM_003988423.5	protein_coding	5	c.989C>G	p.Ala330Gly
chrB4	48382975	C	T	PASS	missense_variant	MODERATE	MANSC1	101091288	transcript	XM_003988423.5	protein_coding	5	c.988G>A	p.Ala330Thr
chrB4	48383054	G	GGTGTTTGAGACT	PASS	disruptive_inframe_insertion	MODERATE	MANSC1	101091288	transcript	XM_003988423.5	protein_coding	5	c.908_909insAGTCTCAAACAC	p.Thr303_Ile304insValSerAsnThr
chrB4	48383239	C	T	PASS	missense_variant	MODERATE	MANSC1	101091288	transcript	XM_003988423.5	protein_coding	5	c.724G>A	p.Ala242Thr
chrB4	48383272	G	T	PASS	missense_variant	MODERATE	MANSC1	101091288	transcript	XM_003988423.5	protein_coding	5	c.691C>A	p.Gln231Lys
chrB4	48395306	A	G	PASS	missense_variant	MODERATE	MANSC1	101091288	transcript	XM_003988423.5	protein_coding	2	c.26T>C	p.Leu9Ser
chrB4	48517309	C	T	PASS	missense_variant	MODERATE	DUSP16	101091792	transcript	XM_011283771.3	protein_coding	8	c.1310G>A	p.Gly437Asp
chrB4	48517309	C	T	PASS	missense_variant	MODERATE	DUSP16	101091792	transcript	XM_019834529.2	protein_coding	8	c.1310G>A	p.Gly437Asp
chrB4	48517309	C	T	PASS	missense_variant	MODERATE	DUSP16	101091792	transcript	XM_019834530.2	protein_coding	9	c.1310G>A	p.Gly437Asp
chrB4	48517309	C	T	PASS	missense_variant	MODERATE	DUSP16	101091792	transcript	XM_023256786.1	protein_coding	8	c.1310G>A	p.Gly437Asp
chrB4	48517309	C	T	PASS	missense_variant	MODERATE	DUSP16	101091792	transcript	XM_023256788.1	protein_coding	10	c.1310G>A	p.Gly437Asp
chrB4	48517310	C	T	PASS	missense_variant	MODERATE	DUSP16	101091792	transcript	XM_011283771.3	protein_coding	8	c.1309G>A	p.Gly437Ser
chrB4	48517310	C	T	PASS	missense_variant	MODERATE	DUSP16	101091792	transcript	XM_019834529.2	protein_coding	8	c.1309G>A	p.Gly437Ser
chrB4	48517310	C	T	PASS	missense_variant	MODERATE	DUSP16	101091792	transcript	XM_019834530.2	protein_coding	9	c.1309G>A	p.Gly437Ser
chrB4	48517310	C	T	PASS	missense_variant	MODERATE	DUSP16	101091792	transcript	XM_023256786.1	protein_coding	8	c.1309G>A	p.Gly437Ser
chrB4	48517310	C	T	PASS	missense_variant	MODERATE	DUSP16	101091792	transcript	XM_023256788.1	protein_coding	10	c.1309G>A	p.Gly437Ser
chrB4	48517385	C	T	PASS	missense_variant	MODERATE	DUSP16	101091792	transcript	XM_011283771.3	protein_coding	8	c.1234G>A	p.Ala412Thr
chrB4	48517385	C	T	PASS	missense_variant	MODERATE	DUSP16	101091792	transcript	XM_019834529.2	protein_coding	8	c.1234G>A	p.Ala412Thr
chrB4	48517385	C	T	PASS	missense_variant	MODERATE	DUSP16	101091792	transcript	XM_019834530.2	protein_coding	9	c.1234G>A	p.Ala412Thr
chrB4	48517385	C	T	PASS	missense_variant	MODERATE	DUSP16	101091792	transcript	XM_023256786.1	protein_coding	8	c.1234G>A	p.Ala412Thr
chrB4	48517385	C	T	PASS	missense_variant	MODERATE	DUSP16	101091792	transcript	XM_023256788.1	protein_coding	10	c.1234G>A	p.Ala412Thr
chrB4	48527818	C	G	PASS	missense_variant&splice_region_variant	MODERATE	DUSP16	101091792	transcript	XM_011283771.3	protein_coding	6	c.534G>C	p.Glu178Asp
chrB4	48527818	C	G	PASS	missense_variant&splice_region_variant	MODERATE	DUSP16	101091792	transcript	XM_019834529.2	protein_coding	6	c.534G>C	p.Glu178Asp
chrB4	48527818	C	G	PASS	missense_variant&splice_region_variant	MODERATE	DUSP16	101091792	transcript	XM_019834530.2	protein_coding	7	c.534G>C	p.Glu178Asp
chrB4	48527818	C	G	PASS	missense_variant&splice_region_variant	MODERATE	DUSP16	101091792	transcript	XM_023256786.1	protein_coding	6	c.534G>C	p.Glu178Asp
chrB4	48527818	C	G	PASS	missense_variant&splice_region_variant	MODERATE	DUSP16	101091792	transcript	XM_023256788.1	protein_coding	8	c.534G>C	p.Glu178Asp
chrB4	48679618	A	G	PASS	missense_variant	MODERATE	GPR19	101092275	transcript	XM_006933523.4	protein_coding	3	c.610T>C	p.Ser204Pro
chrB4	48679618	A	G	PASS	missense_variant	MODERATE	GPR19	101092275	transcript	XM_019834534.1	protein_coding	2	c.610T>C	p.Ser204Pro
chrB4	48679618	A	G	PASS	missense_variant	MODERATE	GPR19	101092275	transcript	XM_019834532.2	protein_coding	3	c.610T>C	p.Ser204Pro
chrB4	48768757	G	T	PASS	missense_variant	MODERATE	APOLD1	102900532	transcript	XM_019834544.1	protein_coding	2	c.142G>T	p.Ala48Ser
chrB4	48768757	G	T	PASS	missense_variant	MODERATE	APOLD1	102900532	transcript	XM_006933525.3	protein_coding	2	c.61G>T	p.Ala21Ser
chrB4	48772485	C	T	PASS	missense_variant	MODERATE	APOLD1	102900532	transcript	XM_019834544.1	protein_coding	3	c.305C>T	p.Ser102Leu
chrB4	48772485	C	T	PASS	missense_variant	MODERATE	APOLD1	102900532	transcript	XM_006933525.3	protein_coding	3	c.224C>T	p.Ser75Leu
chrB4	48772678	C	A	PASS	stop_gained	HIGH	APOLD1	102900532	transcript	XM_019834544.1	protein_coding	3	c.498C>A	p.Cys166*
chrB4	48772678	C	A	PASS	stop_gained	HIGH	APOLD1	102900532	transcript	XM_006933525.3	protein_coding	3	c.417C>A	p.Cys139*
chrB4	48772839	T	A	PASS	missense_variant	MODERATE	APOLD1	102900532	transcript	XM_019834544.1	protein_coding	3	c.659T>A	p.Val220Glu
chrB4	48772839	T	A	PASS	missense_variant	MODERATE	APOLD1	102900532	transcript	XM_006933525.3	protein_coding	3	c.578T>A	p.Val193Glu
chrB4	48908647	T	A	PASS	missense_variant	MODERATE	GPRC5A	101093366	transcript	XM_003988432.4	protein_coding	2	c.388T>A	p.Ser130Thr
chrB4	48908647	T	A	PASS	missense_variant	MODERATE	GPRC5A	101093366	transcript	XM_019834547.1	protein_coding	3	c.388T>A	p.Ser130Thr
chrB4	48908825	C	T	PASS	missense_variant	MODERATE	GPRC5A	101093366	transcript	XM_003988432.4	protein_coding	2	c.566C>T	p.Ala189Val
chrB4	48908825	C	T	PASS	missense_variant	MODERATE	GPRC5A	101093366	transcript	XM_019834547.1	protein_coding	3	c.566C>T	p.Ala189Val
chrB4	48908839	G	A	PASS	missense_variant	MODERATE	GPRC5A	101093366	transcript	XM_003988432.4	protein_coding	2	c.580G>A	p.Ala194Thr
chrB4	48908839	G	A	PASS	missense_variant	MODERATE	GPRC5A	101093366	transcript	XM_019834547.1	protein_coding	3	c.580G>A	p.Ala194Thr
chrB4	48908941	G	A	PASS	missense_variant	MODERATE	GPRC5A	101093366	transcript	XM_003988432.4	protein_coding	2	c.682G>A	p.Val228Ile
chrB4	48908941	G	A	PASS	missense_variant	MODERATE	GPRC5A	101093366	transcript	XM_019834547.1	protein_coding	3	c.682G>A	p.Val228Ile
chrB4	48911858	A	C	PASS	missense_variant	MODERATE	GPRC5A	101093366	transcript	XM_003988432.4	protein_coding	4	c.995A>C	p.Gln332Pro
chrB4	48911858	A	C	PASS	missense_variant	MODERATE	GPRC5A	101093366	transcript	XM_019834547.1	protein_coding	5	c.995A>C	p.Gln332Pro
chrB4	48936142	C	A	PASS	missense_variant	MODERATE	GPRC5D	101082499	transcript	XM_003988470.4	protein_coding	3	c.1097G>T	p.Ser366Ile
chrB4	48936142	C	A	PASS	missense_variant	MODERATE	GPRC5D	101082499	transcript	XM_019834548.1	protein_coding	4	c.1010G>T	p.Ser337Ile
chrB4	48943272	C	T	PASS	missense_variant	MODERATE	GPRC5D	101082499	transcript	XM_003988470.4	protein_coding	1	c.589G>A	p.Val197Met
chrB4	48943272	C	T	PASS	missense_variant	MODERATE	GPRC5D	101082499	transcript	XM_011283806.2	protein_coding	1	c.589G>A	p.Val197Met
chrB4	48943272	C	T	PASS	missense_variant	MODERATE	GPRC5D	101082499	transcript	XM_019834548.1	protein_coding	2	c.502G>A	p.Val168Met
chrB4	48977480	G	A	PASS	missense_variant	MODERATE	HEBP1	101093618	transcript	XM_019834549.2	protein_coding	4	c.410C>T	p.Pro137Leu
chrB4	48977480	G	A	PASS	missense_variant	MODERATE	HEBP1	101093618	transcript	XM_019834550.2	protein_coding	5	c.236C>T	p.Pro79Leu
chrB4	48977481	G	A	PASS	missense_variant	MODERATE	HEBP1	101093618	transcript	XM_019834549.2	protein_coding	4	c.409C>T	p.Pro137Ser
chrB4	48977481	G	A	PASS	missense_variant	MODERATE	HEBP1	101093618	transcript	XM_019834550.2	protein_coding	5	c.235C>T	p.Pro79Ser
chrB4	49029842	G	A	PASS	missense_variant	MODERATE	FAM234B	101082757	transcript	XM_023256791.1	protein_coding	2	c.235G>A	p.Ala79Thr
chrB4	49038227	C	T	PASS	missense_variant	MODERATE	FAM234B	101082757	transcript	XM_023256791.1	protein_coding	5	c.851C>T	p.Ser284Leu
chrB4	49047019	T	TTGG	PASS	disruptive_inframe_insertion	MODERATE	FAM234B	101082757	transcript	XM_023256791.1	protein_coding	10	c.1507_1508insTGG	p.Ser503delinsLeuAla
chrB4	49049383	G	A	PASS	missense_variant	MODERATE	FAM234B	101082757	transcript	XM_023256791.1	protein_coding	11	c.1531G>A	p.Ala511Thr
chrB4	49055343	C	T	PASS	missense_variant	MODERATE	GSG1	101093869	transcript	XM_006933531.4	protein_coding	6	c.970G>A	p.Ala324Thr
chrB4	49055343	C	T	PASS	missense_variant	MODERATE	GSG1	101093869	transcript	XM_006933532.4	protein_coding	6	c.847G>A	p.Ala283Thr
chrB4	49055343	C	T	PASS	missense_variant	MODERATE	GSG1	101093869	transcript	XM_019834552.2	protein_coding	5	c.799G>A	p.Ala267Thr
chrB4	49055496	C	T	PASS	missense_variant	MODERATE	GSG1	101093869	transcript	XM_006933531.4	protein_coding	6	c.817G>A	p.Val273Ile
chrB4	49055496	C	T	PASS	missense_variant	MODERATE	GSG1	101093869	transcript	XM_006933532.4	protein_coding	6	c.694G>A	p.Val232Ile
chrB4	49055496	C	T	PASS	missense_variant	MODERATE	GSG1	101093869	transcript	XM_019834552.2	protein_coding	5	c.646G>A	p.Val216Ile
chrB4	49058308	G	A	PASS	missense_variant	MODERATE	GSG1	101093869	transcript	XM_006933531.4	protein_coding	4	c.628C>T	p.Leu210Phe
chrB4	49058308	G	A	PASS	missense_variant	MODERATE	GSG1	101093869	transcript	XM_006933532.4	protein_coding	4	c.505C>T	p.Leu169Phe
chrB4	49058308	G	A	PASS	missense_variant	MODERATE	GSG1	101093869	transcript	XM_019834552.2	protein_coding	3	c.457C>T	p.Leu153Phe
chrB4	49058340	G	A	PASS	missense_variant	MODERATE	GSG1	101093869	transcript	XM_006933531.4	protein_coding	4	c.596C>T	p.Ala199Val
chrB4	49058340	G	A	PASS	missense_variant	MODERATE	GSG1	101093869	transcript	XM_006933532.4	protein_coding	4	c.473C>T	p.Ala158Val
chrB4	49058340	G	A	PASS	missense_variant	MODERATE	GSG1	101093869	transcript	XM_019834552.2	protein_coding	3	c.425C>T	p.Ala142Val
chrB4	49059121	G	A	PASS	missense_variant	MODERATE	GSG1	101093869	transcript	XM_006933531.4	protein_coding	3	c.532C>T	p.Leu178Phe
chrB4	49059208	T	C	PASS	missense_variant	MODERATE	GSG1	101093869	transcript	XM_006933531.4	protein_coding	3	c.445A>G	p.Thr149Ala
chrB4	49174884	A	G	PASS	missense_variant	MODERATE	EMP1	101094110	transcript	XM_003988435.4	protein_coding	3	c.85A>G	p.Met29Val
chrB4	62474137	G	A	PASS	missense_variant	MODERATE	LOC111561451	111561451	transcript	XM_023257752.1	protein_coding	1	c.479C>T	p.Ser160Leu
chrB4	64573557	C	T	PASS	missense_variant	MODERATE	OVCH1	101087074	transcript	XM_023257753.1	protein_coding	18	c.2404G>A	p.Asp802Asn
chrB4	64580649	G	C	PASS	missense_variant	MODERATE	OVCH1	101087074	transcript	XM_023257753.1	protein_coding	16	c.2121C>G	p.Ile707Met
chrB4	77092073	G	A	PASS	missense_variant	MODERATE	LOC101097405	101097405	transcript	XM_023257003.1	protein_coding	1	c.136C>T	p.Leu46Phe
chrB4	77542912	G	A	PASS	missense_variant	MODERATE	LOC101100898	101100898	transcript	XM_003988654.1	protein_coding	1	c.883G>A	p.Val295Ile
chrB4	77604678	C	T	PASS	missense_variant	MODERATE	LOC109501563	109501563	transcript	XM_023257756.1	protein_coding	1	c.1147G>A	p.Glu383Lys
chrB4	79175990	C	T	PASS	missense_variant	MODERATE	FAM186A	101093949	transcript	XM_023257041.1	protein_coding	8	c.4588G>A	p.Gly1530Arg
chrB4	79175992	A	T	PASS	missense_variant	MODERATE	FAM186A	101093949	transcript	XM_023257041.1	protein_coding	8	c.4586T>A	p.Leu1529Gln
chrB4	80998334	C	T	PASS	missense_variant	MODERATE	LOC105259896	105259896	transcript	XM_023257100.1	protein_coding	1	c.271G>A	p.Gly91Ser
chrB4	85242007	T	C	PASS	missense_variant	MODERATE	LOC111561459	111561459	transcript	XM_023257762.1	protein_coding	1	c.1754A>G	p.Asp585Gly
chrB4	85272811	G	C	PASS	missense_variant	MODERATE	NACA	101087933	transcript	XM_023257147.1	protein_coding	3	c.3784C>G	p.Pro1262Ala
chrB4	126214798	C	CAAATT	PASS	frameshift_variant	HIGH	LOC101083779	101083779	transcript	XM_023257776.1	protein_coding	17	c.2750_2751insAATTT	p.Ser918fs
chrB4	126214799	G	T	PASS	missense_variant	MODERATE	LOC101083779	101083779	transcript	XM_023257776.1	protein_coding	17	c.2750C>A	p.Thr917Lys
chrB4	126214801	G	T	PASS	missense_variant	MODERATE	LOC101083779	101083779	transcript	XM_023257776.1	protein_coding	17	c.2748C>A	p.Asp916Glu
chrB4	126214804	TC	T	PASS	frameshift_variant	HIGH	LOC101083779	101083779	transcript	XM_023257776.1	protein_coding	17	c.2744delG	p.Gly915fs
chrB4	126216808	C	T	PASS	missense_variant	MODERATE	LOC101083779	101083779	transcript	XM_023257776.1	protein_coding	15	c.2560G>A	p.Val854Met
chrB4	126241066	G	C	PASS	missense_variant	MODERATE	LOC101083779	101083779	transcript	XM_023257776.1	protein_coding	8	c.1642C>G	p.Arg548Gly
chrB4	126446344	T	C	PASS	missense_variant	MODERATE	HCFC2	101084553	transcript	XM_023257381.1	protein_coding	17	c.2426T>C	p.Leu809Pro
chrC1	6832884	C	T	PASS	missense_variant	MODERATE	PIK3CD	101094274	transcript	XM_006934259.2	protein_coding	5	c.521C>T	p.Ser174Leu
chrC1	6832884	C	T	PASS	missense_variant	MODERATE	PIK3CD	101094274	transcript	XM_006934260.2	protein_coding	5	c.521C>T	p.Ser174Leu
chrC1	6832884	C	T	PASS	missense_variant	MODERATE	PIK3CD	101094274	transcript	XM_019836105.1	protein_coding	5	c.521C>T	p.Ser174Leu
chrC1	6832884	C	T	PASS	missense_variant	MODERATE	PIK3CD	101094274	transcript	XM_006934262.4	protein_coding	5	c.521C>T	p.Ser174Leu
chrC1	10834906	G	A	PASS	missense_variant	MODERATE	KAZN	101082422	transcript	XM_023260041.1	protein_coding	1	c.166G>A	p.Gly56Ser
chrC1	14033649	G	A	PASS	missense_variant	MODERATE	EMC1	101089281	transcript	XM_006934360.4	protein_coding	7	c.827C>T	p.Thr276Met
chrC1	14033649	G	A	PASS	missense_variant	MODERATE	EMC1	101089281	transcript	XM_003989612.4	protein_coding	7	c.761C>T	p.Thr254Met
chrC1	14033649	G	A	PASS	missense_variant	MODERATE	EMC1	101089281	transcript	XM_006934361.3	protein_coding	7	c.761C>T	p.Thr254Met
chrC1	14033649	G	A	PASS	missense_variant	MODERATE	EMC1	101089281	transcript	XM_006934362.3	protein_coding	7	c.761C>T	p.Thr254Met
chrC1	98669836	C	T	PASS	missense_variant	MODERATE	SYCP1	101097877	transcript	XM_023259019.1	protein_coding	32	c.2960C>T	p.Thr987Ile
chrC1	98669836	C	T	PASS	missense_variant	MODERATE	SYCP1	101097877	transcript	XM_023259021.1	protein_coding	33	c.2882C>T	p.Thr961Ile
chrC1	98669836	C	T	PASS	missense_variant	MODERATE	SYCP1	101097877	transcript	XM_023259020.1	protein_coding	31	c.2897C>T	p.Thr966Ile
chrC1	98669836	C	T	PASS	missense_variant	MODERATE	SYCP1	101097877	transcript	XM_023259022.1	protein_coding	27	c.2414C>T	p.Thr805Ile
chrC1	98713144	G	A	PASS	missense_variant	MODERATE	TSHB	554350	transcript	NM_001048015.1	protein_coding	2	c.355G>A	p.Ala119Thr
chrC1	98713144	G	A	PASS	missense_variant	MODERATE	TSHB	554350	transcript	XM_019835959.2	protein_coding	3	c.355G>A	p.Ala119Thr
chrC1	98713175	A	G	PASS	missense_variant	MODERATE	TSHB	554350	transcript	NM_001048015.1	protein_coding	2	c.386A>G	p.Gln129Arg
chrC1	98713175	A	G	PASS	missense_variant	MODERATE	TSHB	554350	transcript	XM_019835959.2	protein_coding	3	c.386A>G	p.Gln129Arg
chrC1	99274634	C	T	PASS	missense_variant	MODERATE	VANGL1	101082425	transcript	XM_023259024.1	protein_coding	8	c.1382C>T	p.Thr461Met
chrC1	107259855	C	G	PASS	missense_variant	MODERATE	FLG	101086079	transcript	XM_023257844.1	protein_coding	8	c.5945G>C	p.Arg1982Thr
chrC1	110886071	C	T	PASS	missense_variant	MODERATE	FAM168B	101090036	transcript	XM_023259193.1	protein_coding	5	c.430G>A	p.Val144Ile
chrC1	110886071	C	T	PASS	missense_variant	MODERATE	FAM168B	101090036	transcript	XM_023259194.1	protein_coding	5	c.427G>A	p.Val143Ile
chrC1	110886071	C	T	PASS	missense_variant	MODERATE	FAM168B	101090036	transcript	XM_023259195.1	protein_coding	5	c.430G>A	p.Val144Ile
chrC1	117969171	C	G	PASS	missense_variant	MODERATE	LOC109503035	109503035	transcript	XM_023259240.1	protein_coding	2	c.681C>G	p.Asn227Lys
chrC1	127469099	C	T	PASS	missense_variant	MODERATE	LOC111561638	111561638	transcript	XM_023257853.1	protein_coding	2	c.1229C>T	p.Thr410Ile
chrC1	128899646	T	C	PASS	missense_variant	MODERATE	ACMSD	101090201	transcript	XM_023259275.1	protein_coding	5	c.311T>C	p.Val104Ala
chrC1	128899646	T	C	PASS	missense_variant	MODERATE	ACMSD	101090201	transcript	XM_023259276.1	protein_coding	5	c.311T>C	p.Val104Ala
chrC1	128899646	T	C	PASS	missense_variant	MODERATE	ACMSD	101090201	transcript	XM_023259277.1	protein_coding	2	c.137T>C	p.Val46Ala
chrC1	129830635	G	T	PASS	missense_variant	MODERATE	LCT	101092452	transcript	XM_003990733.3	protein_coding	1	c.147C>A	p.Asn49Lys
chrC1	169218716	C	T	PASS	missense_variant	MODERATE	TTN	101080315	transcript	XM_023259509.1	protein_coding	290	c.66107G>A	p.Arg22036Gln
chrC1	169387196	T	A	PASS	missense_variant	MODERATE	LOC109502758	109502758	transcript	XM_019838314.2	protein_coding	2	c.2921A>T	p.Lys974Met
chrC1	169480221	C	T	PASS	missense_variant	MODERATE	CCDC141	101080563	transcript	XM_023259510.1	protein_coding	23	c.4015G>A	p.Ala1339Thr
chrC1	169480221	C	T	PASS	missense_variant	MODERATE	CCDC141	101080563	transcript	XM_019838318.2	protein_coding	22	c.3889G>A	p.Ala1297Thr
chrC1	169480221	C	T	PASS	missense_variant	MODERATE	CCDC141	101080563	transcript	XM_019838319.2	protein_coding	22	c.3835G>A	p.Ala1279Thr
chrC1	169480221	C	T	PASS	missense_variant	MODERATE	CCDC141	101080563	transcript	XM_019838320.2	protein_coding	22	c.3820G>A	p.Ala1274Thr
chrC1	169480221	C	T	PASS	missense_variant	MODERATE	CCDC141	101080563	transcript	XM_019838317.2	protein_coding	23	c.4012G>A	p.Ala1338Thr
chrC1	169480221	C	T	PASS	missense_variant	MODERATE	CCDC141	101080563	transcript	XM_019838321.2	protein_coding	23	c.4015G>A	p.Ala1339Thr
chrC1	172318441	G	A	PASS	missense_variant	MODERATE	SSFA2	101082254	transcript	XM_011285388.2	protein_coding	15	c.3125G>A	p.Arg1042His
chrC1	172318441	G	A	PASS	missense_variant	MODERATE	SSFA2	101082254	transcript	XM_011285389.2	protein_coding	14	c.3125G>A	p.Arg1042His
chrC2	2012316	G	A	PASS	missense_variant	MODERATE	LOC109503265	109503265	transcript	XM_023238646.1	protein_coding	1	c.55G>A	p.Val19Ile
chrC2	2249160	C	T	PASS	missense_variant	MODERATE	DNMT3L	101091300	transcript	XM_023260865.1	protein_coding	5	c.433C>T	p.His145Tyr
chrC2	2250171	C	T	PASS	missense_variant	MODERATE	DNMT3L	101091300	transcript	XM_023260865.1	protein_coding	7	c.631C>T	p.Pro211Ser
chrC2	2256874	C	T	PASS	missense_variant	MODERATE	DNMT3L	101091300	transcript	XM_023260865.1	protein_coding	11	c.1075C>T	p.Arg359Cys
chrC2	2492568	G	A	PASS	missense_variant	MODERATE	AGPAT3	101083195	transcript	XM_003991359.5	protein_coding	3	c.250C>T	p.Arg84Cys
chrC2	2492568	G	A	PASS	missense_variant	MODERATE	AGPAT3	101083195	transcript	XM_019839314.2	protein_coding	3	c.250C>T	p.Arg84Cys
chrC2	2492568	G	A	PASS	missense_variant	MODERATE	AGPAT3	101083195	transcript	XM_006935818.4	protein_coding	3	c.250C>T	p.Arg84Cys
chrC2	2492568	G	A	PASS	missense_variant	MODERATE	AGPAT3	101083195	transcript	XM_023238659.1	protein_coding	3	c.250C>T	p.Arg84Cys
chrC2	2492568	G	A	PASS	missense_variant	MODERATE	AGPAT3	101083195	transcript	XM_023238660.1	protein_coding	3	c.250C>T	p.Arg84Cys
chrC2	7372963	G	A	PASS	missense_variant	MODERATE	KCNJ15	101100322	transcript	XM_019839382.2	protein_coding	3	c.34C>T	p.Pro12Ser
chrC2	7372963	G	A	PASS	missense_variant	MODERATE	KCNJ15	101100322	transcript	XM_023238740.1	protein_coding	2	c.34C>T	p.Pro12Ser
chrC2	7372963	G	A	PASS	missense_variant	MODERATE	KCNJ15	101100322	transcript	XM_019839384.2	protein_coding	3	c.34C>T	p.Pro12Ser
chrC2	7372963	G	A	PASS	missense_variant	MODERATE	KCNJ15	101100322	transcript	XM_019839383.2	protein_coding	4	c.34C>T	p.Pro12Ser
chrC2	8094632	A	G	PASS	splice_acceptor_variant&intron_variant	HIGH	LOC109503314	109503314	transcript	XR_002162215.1	pseudogene	1	n.456-2A>G
chrC2	8378939	G	A	PASS	missense_variant	MODERATE	DSCR3	101081072	transcript	XM_019839392.2	protein_coding	8	c.826G>A	p.Asp276Asn
chrC2	8378942	A	G	PASS	missense_variant	MODERATE	DSCR3	101081072	transcript	XM_019839392.2	protein_coding	8	c.829A>G	p.Ser277Gly
chrC2	8424236	CCT	C	PASS	frameshift_variant	HIGH	TTC3	101081324	transcript	XM_023238746.1	protein_coding	47	c.6029_6030delAG	p.Glu2010fs
chrC2	8429216	T	G	PASS	missense_variant	MODERATE	TTC3	101081324	transcript	XM_023238746.1	protein_coding	45	c.5750A>C	p.Asp1917Ala
chrC2	8431411	C	A	PASS	missense_variant	MODERATE	TTC3	101081324	transcript	XM_023238746.1	protein_coding	43	c.5497G>T	p.Ala1833Ser
chrC2	8431479	C	T	PASS	missense_variant	MODERATE	TTC3	101081324	transcript	XM_023238746.1	protein_coding	43	c.5429G>A	p.Cys1810Tyr
chrC2	8431488	C	A	PASS	missense_variant	MODERATE	TTC3	101081324	transcript	XM_023238746.1	protein_coding	43	c.5420G>T	p.Arg1807Leu
chrC2	8431518	G	A	PASS	missense_variant	MODERATE	TTC3	101081324	transcript	XM_023238746.1	protein_coding	43	c.5390C>T	p.Ser1797Leu
chrC2	8431558	T	C	PASS	missense_variant	MODERATE	TTC3	101081324	transcript	XM_023238746.1	protein_coding	43	c.5350A>G	p.Ser1784Gly
chrC2	8431605	C	T	PASS	missense_variant	MODERATE	TTC3	101081324	transcript	XM_023238746.1	protein_coding	43	c.5303G>A	p.Gly1768Glu
chrC2	8431629	T	C	PASS	missense_variant	MODERATE	TTC3	101081324	transcript	XM_023238746.1	protein_coding	43	c.5279A>G	p.Asn1760Ser
chrC2	8434348	A	G	PASS	missense_variant	MODERATE	TTC3	101081324	transcript	XM_023238746.1	protein_coding	42	c.5200T>C	p.Phe1734Leu
chrC2	8461524	G	A	PASS	missense_variant	MODERATE	TTC3	101081324	transcript	XM_023238746.1	protein_coding	35	c.4415C>T	p.Thr1472Ile
chrC2	8461525	T	C	PASS	missense_variant	MODERATE	TTC3	101081324	transcript	XM_023238746.1	protein_coding	35	c.4414A>G	p.Thr1472Ala
chrC2	8462724	T	C	PASS	missense_variant	MODERATE	TTC3	101081324	transcript	XM_023238746.1	protein_coding	34	c.4144A>G	p.Ile1382Val
chrC2	8462810	C	T	PASS	missense_variant	MODERATE	TTC3	101081324	transcript	XM_023238746.1	protein_coding	34	c.4058G>A	p.Ser1353Asn
chrC2	8463012	G	C	PASS	missense_variant	MODERATE	TTC3	101081324	transcript	XM_023238746.1	protein_coding	34	c.3856C>G	p.Arg1286Gly
chrC2	8463196	C	G	PASS	missense_variant	MODERATE	TTC3	101081324	transcript	XM_023238746.1	protein_coding	34	c.3672G>C	p.Glu1224Asp
chrC2	8505306	G	A	PASS	missense_variant	MODERATE	TTC3	101081324	transcript	XM_023238746.1	protein_coding	14	c.1133C>T	p.Ala378Val
chrC2	8597649	A	T	PASS	missense_variant	MODERATE	RIPPLY3	101081826	transcript	XM_023238748.1	protein_coding	5	c.783T>A	p.Asn261Lys
chrC2	8597665	TTGGGAA	T	PASS	disruptive_inframe_deletion	MODERATE	RIPPLY3	101081826	transcript	XM_023238748.1	protein_coding	5	c.761_766delTTCCCA	p.Ile254_Pro255del
chrC2	8597727	G	C	PASS	stop_gained	HIGH	RIPPLY3	101081826	transcript	XM_023238748.1	protein_coding	5	c.705C>G	p.Tyr235*
chrC2	8597860	G	A	PASS	missense_variant	MODERATE	RIPPLY3	101081826	transcript	XM_023238748.1	protein_coding	5	c.572C>T	p.Thr191Ile
chrC2	8597905	C	T	PASS	missense_variant	MODERATE	RIPPLY3	101081826	transcript	XM_023238748.1	protein_coding	5	c.527G>A	p.Arg176Lys
chrC2	8597914	G	A	PASS	missense_variant	MODERATE	RIPPLY3	101081826	transcript	XM_023238748.1	protein_coding	5	c.518C>T	p.Pro173Leu
chrC2	8598175	C	T	PASS	missense_variant	MODERATE	RIPPLY3	101081826	transcript	XM_023238748.1	protein_coding	4	c.493G>A	p.Gly165Ser
chrC2	8598175	C	T	PASS	missense_variant	MODERATE	RIPPLY3	101081826	transcript	XM_023238749.1	protein_coding	4	c.493G>A	p.Gly165Ser
chrC2	8598270	T	C	PASS	missense_variant	MODERATE	RIPPLY3	101081826	transcript	XM_023238748.1	protein_coding	4	c.398A>G	p.Gln133Arg
chrC2	8598270	T	C	PASS	missense_variant	MODERATE	RIPPLY3	101081826	transcript	XM_023238749.1	protein_coding	4	c.398A>G	p.Gln133Arg
chrC2	8598283	A	G	PASS	missense_variant	MODERATE	RIPPLY3	101081826	transcript	XM_023238748.1	protein_coding	4	c.385T>C	p.Ser129Pro
chrC2	8598283	A	G	PASS	missense_variant	MODERATE	RIPPLY3	101081826	transcript	XM_023238749.1	protein_coding	4	c.385T>C	p.Ser129Pro
chrC2	8598289	TTTC	T	PASS	conservative_inframe_deletion	MODERATE	RIPPLY3	101081826	transcript	XM_023238748.1	protein_coding	4	c.376_378delGAA	p.Glu126del
chrC2	8598289	TTTC	T	PASS	conservative_inframe_deletion	MODERATE	RIPPLY3	101081826	transcript	XM_023238749.1	protein_coding	4	c.376_378delGAA	p.Glu126del
chrC2	8602230	G	A	PASS	missense_variant	MODERATE	RIPPLY3	101081826	transcript	XM_023238748.1	protein_coding	3	c.200C>T	p.Pro67Leu
chrC2	8602230	G	A	PASS	missense_variant	MODERATE	RIPPLY3	101081826	transcript	XM_023238749.1	protein_coding	3	c.200C>T	p.Pro67Leu
chrC2	8608487	T	C	PASS	missense_variant	MODERATE	RIPPLY3	101081826	transcript	XM_023238748.1	protein_coding	2	c.160A>G	p.Thr54Ala
chrC2	8608487	T	C	PASS	missense_variant	MODERATE	RIPPLY3	101081826	transcript	XM_023238749.1	protein_coding	2	c.160A>G	p.Thr54Ala
chrC2	8661636	T	G	PASS	missense_variant	MODERATE	HLCS	101100992	transcript	XM_023238750.1	protein_coding	4	c.421T>G	p.Ser141Ala
chrC2	8661636	T	G	PASS	missense_variant	MODERATE	HLCS	101100992	transcript	XM_023238751.1	protein_coding	3	c.346T>G	p.Ser116Ala
chrC2	8664670	G	T	PASS	missense_variant	MODERATE	HLCS	101100992	transcript	XM_023238750.1	protein_coding	5	c.1276G>T	p.Ala426Ser
chrC2	8664670	G	T	PASS	missense_variant	MODERATE	HLCS	101100992	transcript	XM_023238752.1	protein_coding	5	c.757G>T	p.Ala253Ser
chrC2	8664670	G	T	PASS	missense_variant	MODERATE	HLCS	101100992	transcript	XM_023238753.1	protein_coding	5	c.757G>T	p.Ala253Ser
chrC2	8664670	G	T	PASS	missense_variant	MODERATE	HLCS	101100992	transcript	XM_019839391.2	protein_coding	4	c.757G>T	p.Ala253Ser
chrC2	8664670	G	T	PASS	missense_variant	MODERATE	HLCS	101100992	transcript	XM_023238751.1	protein_coding	4	c.1201G>T	p.Ala401Ser
chrC2	8846010	C	A	PASS	missense_variant	MODERATE	HLCS	101100992	transcript	XM_023238750.1	protein_coding	8	c.1994C>A	p.Pro665Gln
chrC2	8846010	C	A	PASS	missense_variant	MODERATE	HLCS	101100992	transcript	XM_023238752.1	protein_coding	8	c.1475C>A	p.Pro492Gln
chrC2	8846010	C	A	PASS	missense_variant	MODERATE	HLCS	101100992	transcript	XM_023238753.1	protein_coding	8	c.1475C>A	p.Pro492Gln
chrC2	8846010	C	A	PASS	missense_variant	MODERATE	HLCS	101100992	transcript	XM_019839391.2	protein_coding	7	c.1475C>A	p.Pro492Gln
chrC2	8846010	C	A	PASS	missense_variant	MODERATE	HLCS	101100992	transcript	XM_023238751.1	protein_coding	7	c.1919C>A	p.Pro640Gln
chrC2	8866953	T	C	PASS	missense_variant	MODERATE	SIM2	101101246	transcript	XM_023238754.1	protein_coding	10	c.1555A>G	p.Ser519Gly
chrC2	8866965	T	C	PASS	missense_variant	MODERATE	SIM2	101101246	transcript	XM_023238754.1	protein_coding	10	c.1543A>G	p.Thr515Ala
chrC2	8908181	C	T	PASS	missense_variant	MODERATE	SIM2	101101246	transcript	XM_023238754.1	protein_coding	2	c.208G>A	p.Ala70Thr
chrC2	9100859	C	A	PASS	missense_variant	MODERATE	CLDN14	101082083	transcript	XM_019839394.2	protein_coding	1	c.17C>A	p.Thr6Lys
chrC2	9111907	A	G	PASS	missense_variant	MODERATE	CLDN14	101082083	transcript	XM_019839394.2	protein_coding	2	c.95A>G	p.Asn32Ser
chrC2	9111907	A	G	PASS	missense_variant	MODERATE	CLDN14	101082083	transcript	XM_003991439.3	protein_coding	2	c.8A>G	p.Asn3Ser
chrC2	9175552	T	C	PASS	missense_variant&splice_region_variant	MODERATE	CHAF1B	101082336	transcript	XM_006935899.3	protein_coding	11	c.922A>G	p.Arg308Gly
chrC2	9175552	T	C	PASS	missense_variant&splice_region_variant	MODERATE	CHAF1B	101082336	transcript	XM_019839397.2	protein_coding	11	c.922A>G	p.Arg308Gly
chrC2	9288924	T	C	PASS	missense_variant	MODERATE	DOPEY2	101082590	transcript	XM_023238757.1	protein_coding	19	c.4595A>G	p.Lys1532Arg
chrC2	9288924	T	C	PASS	missense_variant	MODERATE	DOPEY2	101082590	transcript	XM_023238758.1	protein_coding	19	c.4595A>G	p.Lys1532Arg
chrC2	9289143	T	G	PASS	missense_variant	MODERATE	DOPEY2	101082590	transcript	XM_023238757.1	protein_coding	19	c.4376A>C	p.Gln1459Pro
chrC2	9289143	T	G	PASS	missense_variant	MODERATE	DOPEY2	101082590	transcript	XM_023238758.1	protein_coding	19	c.4376A>C	p.Gln1459Pro
chrC2	9289262	G	A,C	PASS	missense_variant	MODERATE	DOPEY2	101082590	transcript	XM_023238757.1	protein_coding	19	c.4257C>G	p.Phe1419Leu
chrC2	9289262	G	A,C	PASS	missense_variant	MODERATE	DOPEY2	101082590	transcript	XM_023238758.1	protein_coding	19	c.4257C>G	p.Phe1419Leu
chrC2	9290082	G	A	PASS	missense_variant	MODERATE	DOPEY2	101082590	transcript	XM_023238757.1	protein_coding	19	c.3437C>T	p.Ala1146Val
chrC2	9290082	G	A	PASS	missense_variant	MODERATE	DOPEY2	101082590	transcript	XM_023238758.1	protein_coding	19	c.3437C>T	p.Ala1146Val
chrC2	9290236	A	G	PASS	missense_variant	MODERATE	DOPEY2	101082590	transcript	XM_023238757.1	protein_coding	19	c.3283T>C	p.Phe1095Leu
chrC2	9290236	A	G	PASS	missense_variant	MODERATE	DOPEY2	101082590	transcript	XM_023238758.1	protein_coding	19	c.3283T>C	p.Phe1095Leu
chrC2	9290374	C	T	PASS	missense_variant	MODERATE	DOPEY2	101082590	transcript	XM_023238757.1	protein_coding	19	c.3145G>A	p.Gly1049Ser
chrC2	9290374	C	T	PASS	missense_variant	MODERATE	DOPEY2	101082590	transcript	XM_023238758.1	protein_coding	19	c.3145G>A	p.Gly1049Ser
chrC2	9290386	G	C	PASS	missense_variant	MODERATE	DOPEY2	101082590	transcript	XM_023238757.1	protein_coding	19	c.3133C>G	p.Leu1045Val
chrC2	9290386	G	C	PASS	missense_variant	MODERATE	DOPEY2	101082590	transcript	XM_023238758.1	protein_coding	19	c.3133C>G	p.Leu1045Val
chrC2	9304078	G	C	PASS	missense_variant	MODERATE	DOPEY2	101082590	transcript	XM_023238757.1	protein_coding	15	c.2444C>G	p.Ser815Cys
chrC2	9304078	G	C	PASS	missense_variant	MODERATE	DOPEY2	101082590	transcript	XM_023238758.1	protein_coding	15	c.2444C>G	p.Ser815Cys
chrC2	9306545	C	G	PASS	missense_variant	MODERATE	DOPEY2	101082590	transcript	XM_023238757.1	protein_coding	14	c.1678G>C	p.Gly560Arg
chrC2	9306545	C	G	PASS	missense_variant	MODERATE	DOPEY2	101082590	transcript	XM_023238758.1	protein_coding	14	c.1678G>C	p.Gly560Arg
chrC2	9409861	A	G	PASS	missense_variant	MODERATE	LOC101083875	101083875	transcript	XM_003991445.3	protein_coding	3	c.631T>C	p.Tyr211His
chrC2	9412901	T	C	PASS	missense_variant	MODERATE	LOC101083875	101083875	transcript	XM_003991445.3	protein_coding	1	c.212A>G	p.His71Arg
chrC2	9412923	T	C	PASS	missense_variant	MODERATE	LOC101083875	101083875	transcript	XM_003991445.3	protein_coding	1	c.190A>G	p.Ile64Val
chrC2	9416001	C	T	PASS	missense_variant	MODERATE	LOC102901316	102901316	transcript	XM_011285830.3	protein_coding	3	c.763G>A	p.Val255Ile
chrC2	9416133	G	A	PASS	missense_variant	MODERATE	LOC102901316	102901316	transcript	XM_011285830.3	protein_coding	3	c.631C>T	p.His211Tyr
chrC2	9416158	C	A	QD2	missense_variant	MODERATE	LOC102901316	102901316	transcript	XM_011285830.3	protein_coding	3	c.606G>T	p.Met202Ile
chrC2	9416183	GCCCT	G	PASS	frameshift_variant	HIGH	LOC102901316	102901316	transcript	XM_011285830.3	protein_coding	3	c.577_580delAGGG	p.Arg193fs
chrC2	9416199	A	T	PASS	missense_variant	MODERATE	LOC102901316	102901316	transcript	XM_011285830.3	protein_coding	3	c.565T>A	p.Trp189Arg
chrC2	9416206	C	G	PASS	missense_variant	MODERATE	LOC102901316	102901316	transcript	XM_011285830.3	protein_coding	3	c.558G>C	p.Lys186Asn
chrC2	9416212	GT	G	PASS	frameshift_variant	HIGH	LOC102901316	102901316	transcript	XM_011285830.3	protein_coding	3	c.551delA	p.His184fs
chrC2	9416218	C	CACT	PASS	disruptive_inframe_insertion	MODERATE	LOC102901316	102901316	transcript	XM_011285830.3	protein_coding	3	c.545_546insAGT	p.Gly182_Leu183insVal
chrC2	9416228	G	A	PASS	missense_variant	MODERATE	LOC102901316	102901316	transcript	XM_011285830.3	protein_coding	3	c.536C>T	p.Thr179Ile
chrC2	9416229	T	C	PASS	missense_variant	MODERATE	LOC102901316	102901316	transcript	XM_011285830.3	protein_coding	3	c.535A>G	p.Thr179Ala
chrC2	9422708	T	C	PASS	missense_variant	MODERATE	LOC102901316	102901316	transcript	XM_011285830.3	protein_coding	2	c.331A>G	p.Met111Val
chrC2	9423323	G	A	PASS	missense_variant	MODERATE	LOC102901316	102901316	transcript	XM_011285830.3	protein_coding	1	c.283C>T	p.Leu95Phe
chrC2	9423331	G	C	PASS	missense_variant	MODERATE	LOC102901316	102901316	transcript	XM_011285830.3	protein_coding	1	c.275C>G	p.Ala92Gly
chrC2	9423343	A	G	PASS	missense_variant	MODERATE	LOC102901316	102901316	transcript	XM_011285830.3	protein_coding	1	c.263T>C	p.Val88Ala
chrC2	9423475	T	C	PASS	missense_variant	MODERATE	LOC102901316	102901316	transcript	XM_011285830.3	protein_coding	1	c.131A>G	p.Gln44Arg
chrC2	9462479	T	G	PASS	missense_variant	MODERATE	LOC101084134	101084134	transcript	XM_003991446.4	protein_coding	3	c.843A>C	p.Arg281Ser
chrC2	9462480	C	G	PASS	missense_variant	MODERATE	LOC101084134	101084134	transcript	XM_003991446.4	protein_coding	3	c.842G>C	p.Arg281Thr
chrC2	9462868	G	A	PASS	missense_variant	MODERATE	LOC101084134	101084134	transcript	XM_003991446.4	protein_coding	3	c.454C>T	p.Pro152Ser
chrC2	9462870	C	T	PASS	missense_variant	MODERATE	LOC101084134	101084134	transcript	XM_003991446.4	protein_coding	3	c.452G>A	p.Ser151Asn
chrC2	9468824	C	G	PASS	missense_variant	MODERATE	LOC101084134	101084134	transcript	XM_003991446.4	protein_coding	2	c.325G>C	p.Val109Leu
chrC2	9468851	A	G	PASS	missense_variant	MODERATE	LOC101084134	101084134	transcript	XM_003991446.4	protein_coding	2	c.298T>C	p.Ser100Pro
chrC2	9469406	G	T	PASS	missense_variant&splice_region_variant	MODERATE	LOC101084134	101084134	transcript	XM_003991446.4	protein_coding	1	c.287C>A	p.Ala96Asp
chrC2	9469410	G	A	PASS	missense_variant	MODERATE	LOC101084134	101084134	transcript	XM_003991446.4	protein_coding	1	c.283C>T	p.Leu95Phe
chrC2	9469482	C	G	PASS	missense_variant	MODERATE	LOC101084134	101084134	transcript	XM_003991446.4	protein_coding	1	c.211G>C	p.Gly71Arg
chrC2	9469562	A	C	PASS	missense_variant	MODERATE	LOC101084134	101084134	transcript	XM_003991446.4	protein_coding	1	c.131T>G	p.Leu44Arg
chrC2	9469604	G	A	PASS	missense_variant	MODERATE	LOC101084134	101084134	transcript	XM_003991446.4	protein_coding	1	c.89C>T	p.Ser30Phe
chrC2	9469610	C	T	PASS	missense_variant	MODERATE	LOC101084134	101084134	transcript	XM_003991446.4	protein_coding	1	c.83G>A	p.Arg28Gln
chrC2	9469623	C	T	PASS	missense_variant	MODERATE	LOC101084134	101084134	transcript	XM_003991446.4	protein_coding	1	c.70G>A	p.Asp24Asn
chrC2	9469631	A	G	PASS	missense_variant	MODERATE	LOC101084134	101084134	transcript	XM_003991446.4	protein_coding	1	c.62T>C	p.Ile21Thr
chrC2	9469636	C	G	PASS	missense_variant	MODERATE	LOC101084134	101084134	transcript	XM_003991446.4	protein_coding	1	c.57G>C	p.Leu19Phe
chrC2	9481599	A	T	PASS	missense_variant	MODERATE	LOC105260891	105260891	transcript	XM_023238763.1	protein_coding	3	c.536T>A	p.Val179Asp
chrC2	9481735	T	C	PASS	missense_variant	MODERATE	LOC105260891	105260891	transcript	XM_023238763.1	protein_coding	3	c.400A>G	p.Arg134Gly
chrC2	9481968	G	A	PASS	missense_variant	MODERATE	LOC105260891	105260891	transcript	XM_023238763.1	protein_coding	3	c.167C>T	p.Pro56Leu
chrC2	9493210	T	C	PASS	missense_variant	MODERATE	LOC101084388	101084388	transcript	XM_011285768.3	protein_coding	3	c.386A>G	p.Lys129Arg
chrC2	9493969	C	T	PASS	missense_variant	MODERATE	LOC101084388	101084388	transcript	XM_011285768.3	protein_coding	2	c.193G>A	p.Asp65Asn
chrC2	9493972	C	T	PASS	missense_variant	MODERATE	LOC101084388	101084388	transcript	XM_011285768.3	protein_coding	2	c.190G>A	p.Asp64Asn
chrC2	9500081	T	G	PASS	missense_variant	MODERATE	LOC109503322	109503322	transcript	XM_023238761.1	protein_coding	1	c.470A>C	p.Asp157Ala
chrC2	9500193	T	C	PASS	missense_variant	MODERATE	LOC109503322	109503322	transcript	XM_023238761.1	protein_coding	1	c.358A>G	p.Lys120Glu
chrC2	9500208	G	A	PASS	missense_variant	MODERATE	LOC109503322	109503322	transcript	XM_023238761.1	protein_coding	1	c.343C>T	p.Pro115Ser
chrC2	9500238	A	G	PASS	missense_variant	MODERATE	LOC109503322	109503322	transcript	XM_023238761.1	protein_coding	1	c.313T>C	p.Tyr105His
chrC2	9500275	A	ATG	PASS	frameshift_variant	HIGH	LOC109503322	109503322	transcript	XM_023238761.1	protein_coding	1	c.275_276insCA	p.Lys93fs
chrC2	9500276	A	AGTCCAAGAGTTTAG	PASS	frameshift_variant	HIGH	LOC109503322	109503322	transcript	XM_023238761.1	protein_coding	1	c.274_275insCTAAACTCTTGGAC	p.Phe92fs
chrC2	9500358	T	G	PASS	missense_variant	MODERATE	LOC109503322	109503322	transcript	XM_023238761.1	protein_coding	1	c.193A>C	p.Ile65Leu
chrC2	9500399	GC	G	PASS	frameshift_variant	HIGH	LOC109503322	109503322	transcript	XM_023238761.1	protein_coding	1	c.151delG	p.Ala51fs
chrC2	9500484	C	G	PASS	missense_variant	MODERATE	LOC109503322	109503322	transcript	XM_023238761.1	protein_coding	1	c.67G>C	p.Gly23Arg
chrC2	9500524	A	C	PASS	missense_variant	MODERATE	LOC109503322	109503322	transcript	XM_023238761.1	protein_coding	1	c.27T>G	p.Ser9Arg
chrC2	9523339	G	C	PASS	missense_variant	MODERATE	SETD4	101083104	transcript	XM_023238760.1	protein_coding	11	c.1261G>C	p.Glu421Gln
chrC2	9733005	G	C	PASS	missense_variant	MODERATE	LOC109491637	109491637	transcript	XM_023260844.1	protein_coding	1	c.159G>C	p.Trp53Cys
chrC2	9733012	T	C	PASS	missense_variant	MODERATE	LOC109491637	109491637	transcript	XM_023260844.1	protein_coding	1	c.166T>C	p.Ser56Pro
chrC2	9733147	CG	C	PASS	frameshift_variant	HIGH	LOC109491637	109491637	transcript	XM_023260844.1	protein_coding	1	c.304delG	p.Glu102fs
chrC2	9733160	G	C	PASS	missense_variant	MODERATE	LOC109491637	109491637	transcript	XM_023260844.1	protein_coding	1	c.314G>C	p.Ser105Thr
chrC2	9733184	G	A	PASS	missense_variant	MODERATE	LOC109491637	109491637	transcript	XM_023260844.1	protein_coding	1	c.338G>A	p.Cys113Tyr
chrC2	9733196	G	A	PASS	missense_variant	MODERATE	LOC109491637	109491637	transcript	XM_023260844.1	protein_coding	1	c.350G>A	p.Arg117His
chrC2	9733202	A	G	PASS	missense_variant	MODERATE	LOC109491637	109491637	transcript	XM_023260844.1	protein_coding	1	c.356A>G	p.Gln119Arg
chrC2	9733318	G	C	PASS	missense_variant	MODERATE	LOC109491637	109491637	transcript	XM_023260844.1	protein_coding	1	c.472G>C	p.Val158Leu
chrC2	9767162	G	GAC	PASS	frameshift_variant	HIGH	LOC109491637	109491637	transcript	XM_023260844.1	protein_coding	2	c.683_684dupCA	p.Val229fs
chrC2	9767191	C	T	PASS	missense_variant	MODERATE	LOC109491637	109491637	transcript	XM_023260844.1	protein_coding	2	c.710C>T	p.Thr237Met
chrC2	9767227	G	T	PASS	missense_variant	MODERATE	LOC109491637	109491637	transcript	XM_023260844.1	protein_coding	2	c.746G>T	p.Arg249Leu
chrC2	10804914	A	G	PASS	missense_variant	MODERATE	CLIC6	101085145	transcript	XM_023238767.1	protein_coding	1	c.773T>C	p.Val258Ala
chrC2	10804921	T	C	PASS	missense_variant	MODERATE	CLIC6	101085145	transcript	XM_023238767.1	protein_coding	1	c.766A>G	p.Thr256Ala
chrC2	10804950	T	G	PASS	missense_variant	MODERATE	CLIC6	101085145	transcript	XM_023238767.1	protein_coding	1	c.737A>C	p.Glu246Ala
chrC2	10804956	T	C	PASS	missense_variant	MODERATE	CLIC6	101085145	transcript	XM_023238767.1	protein_coding	1	c.731A>G	p.Glu244Gly
chrC2	10804980	G	A	PASS	missense_variant	MODERATE	CLIC6	101085145	transcript	XM_023238767.1	protein_coding	1	c.707C>T	p.Ser236Phe
chrC2	10949251	T	C	PASS	missense_variant	MODERATE	RCAN1	101085821	transcript	XM_023238769.1	protein_coding	1	c.8T>C	p.Leu3Pro
chrC2	10949260	G	C	PASS	missense_variant	MODERATE	RCAN1	101085821	transcript	XM_023238769.1	protein_coding	1	c.17G>C	p.Gly6Ala
chrC2	10949296	C	T	PASS	missense_variant	MODERATE	RCAN1	101085821	transcript	XM_023238769.1	protein_coding	1	c.53C>T	p.Ser18Phe
chrC2	11009867	A	G	PASS	missense_variant	MODERATE	KCNE1	493681	transcript	NM_001009206.1	protein_coding	1	c.268A>G	p.Lys90Glu
chrC2	11009867	A	G	PASS	missense_variant	MODERATE	KCNE1	493681	transcript	XM_023260085.1	protein_coding	2	c.268A>G	p.Lys90Glu
chrC2	11033892	T	C	PASS	missense_variant	MODERATE	LOC109503329	109503329	transcript	XM_019839403.1	protein_coding	1	c.164T>C	p.Leu55Pro
chrC2	11033936	C	A	PASS	missense_variant	MODERATE	LOC109503329	109503329	transcript	XM_019839403.1	protein_coding	1	c.208C>A	p.Pro70Thr
chrC2	11034063	CT	C	PASS	frameshift_variant	HIGH	LOC109503329	109503329	transcript	XM_019839403.1	protein_coding	2	c.217delT	p.Ser73fs
chrC2	11034095	G	A	PASS	missense_variant	MODERATE	LOC109503329	109503329	transcript	XM_019839403.1	protein_coding	2	c.248G>A	p.Arg83Gln
chrC2	11034127	C	G	PASS	missense_variant	MODERATE	LOC109503329	109503329	transcript	XM_019839403.1	protein_coding	2	c.280C>G	p.Gln94Glu
chrC2	11034155	C	T	PASS	missense_variant	MODERATE	LOC109503329	109503329	transcript	XM_019839403.1	protein_coding	2	c.308C>T	p.Pro103Leu
chrC2	11036470	G	T	PASS	stop_lost	HIGH	LOC109503329	109503329	transcript	XM_019839403.1	protein_coding	3	c.443G>T	p.Ter148Leuext*?
chrC2	11064435	C	G	PASS	missense_variant	MODERATE	CC2H21orf140	102899365	transcript	XM_006935906.3	protein_coding	1	c.166C>G	p.Leu56Val
chrC2	11064438	A	G	PASS	missense_variant	MODERATE	CC2H21orf140	102899365	transcript	XM_006935906.3	protein_coding	1	c.169A>G	p.Thr57Ala
chrC2	11064453	A	G	PASS	missense_variant	MODERATE	CC2H21orf140	102899365	transcript	XM_006935906.3	protein_coding	1	c.184A>G	p.Ser62Gly
chrC2	11064655	G	A	PASS	missense_variant	MODERATE	CC2H21orf140	102899365	transcript	XM_006935906.3	protein_coding	1	c.386G>A	p.Arg129Gln
chrC2	11064877	A	G	PASS	missense_variant	MODERATE	CC2H21orf140	102899365	transcript	XM_006935906.3	protein_coding	1	c.608A>G	p.Gln203Arg
chrC2	11065014	A	C	PASS	missense_variant	MODERATE	CC2H21orf140	102899365	transcript	XM_006935906.3	protein_coding	1	c.745A>C	p.Lys249Gln
chrC2	11065023	T	G	PASS	stop_lost	HIGH	CC2H21orf140	102899365	transcript	XM_006935906.3	protein_coding	1	c.754T>G	p.Ter252Gluext*?
chrC2	11076057	T	C	PASS	missense_variant	MODERATE	SMIM11A	101086081	transcript	XM_003991450.4	protein_coding	3	c.25A>G	p.Met9Val
chrC2	11076057	T	C	PASS	missense_variant	MODERATE	SMIM11A	101086081	transcript	XM_011285764.3	protein_coding	4	c.25A>G	p.Met9Val
chrC2	11076057	T	C	PASS	missense_variant	MODERATE	SMIM11A	101086081	transcript	XM_006935905.4	protein_coding	5	c.25A>G	p.Met9Val
chrC2	11076057	T	C	PASS	missense_variant	MODERATE	SMIM11A	101086081	transcript	XM_019839410.2	protein_coding	4	c.25A>G	p.Met9Val
chrC2	11076057	T	C	PASS	missense_variant	MODERATE	SMIM11A	101086081	transcript	XM_011285766.3	protein_coding	4	c.25A>G	p.Met9Val
chrC2	11076057	T	C	PASS	missense_variant	MODERATE	SMIM11A	101086081	transcript	XM_011285765.3	protein_coding	4	c.25A>G	p.Met9Val
chrC2	11089791	G	C	PASS	missense_variant	MODERATE	KCNE2	101086335	transcript	XM_019839406.2	protein_coding	5	c.503C>G	p.Thr168Ser
chrC2	11089791	G	C	PASS	missense_variant	MODERATE	KCNE2	101086335	transcript	XM_019839408.2	protein_coding	2	c.323C>G	p.Thr108Ser
chrC2	11089791	G	C	PASS	missense_variant	MODERATE	KCNE2	101086335	transcript	XM_006935910.4	protein_coding	3	c.446C>G	p.Thr149Ser
chrC2	11089791	G	C	PASS	missense_variant	MODERATE	KCNE2	101086335	transcript	XM_023238774.1	protein_coding	5	c.446C>G	p.Thr149Ser
chrC2	11089791	G	C	PASS	missense_variant	MODERATE	KCNE2	101086335	transcript	XM_023238775.1	protein_coding	4	c.446C>G	p.Thr149Ser
chrC2	11089791	G	C	PASS	missense_variant	MODERATE	KCNE2	101086335	transcript	XM_023238776.1	protein_coding	4	c.446C>G	p.Thr149Ser
chrC2	11089791	G	C	PASS	missense_variant	MODERATE	KCNE2	101086335	transcript	XM_023238773.1	protein_coding	3	c.500C>G	p.Thr167Ser
chrC2	11089813	C	A	PASS	missense_variant	MODERATE	KCNE2	101086335	transcript	XM_019839406.2	protein_coding	5	c.481G>T	p.Val161Leu
chrC2	11089813	C	A	PASS	missense_variant	MODERATE	KCNE2	101086335	transcript	XM_019839408.2	protein_coding	2	c.301G>T	p.Val101Leu
chrC2	11089813	C	A	PASS	missense_variant	MODERATE	KCNE2	101086335	transcript	XM_006935910.4	protein_coding	3	c.424G>T	p.Val142Leu
chrC2	11089813	C	A	PASS	missense_variant	MODERATE	KCNE2	101086335	transcript	XM_023238774.1	protein_coding	5	c.424G>T	p.Val142Leu
chrC2	11089813	C	A	PASS	missense_variant	MODERATE	KCNE2	101086335	transcript	XM_023238775.1	protein_coding	4	c.424G>T	p.Val142Leu
chrC2	11089813	C	A	PASS	missense_variant	MODERATE	KCNE2	101086335	transcript	XM_023238776.1	protein_coding	4	c.424G>T	p.Val142Leu
chrC2	11089813	C	A	PASS	missense_variant	MODERATE	KCNE2	101086335	transcript	XM_023238773.1	protein_coding	3	c.478G>T	p.Val160Leu
chrC2	11090056	T	C	PASS	missense_variant	MODERATE	KCNE2	101086335	transcript	XM_019839406.2	protein_coding	5	c.238A>G	p.Ile80Val
chrC2	11090056	T	C	PASS	missense_variant	MODERATE	KCNE2	101086335	transcript	XM_019839408.2	protein_coding	2	c.58A>G	p.Ile20Val
chrC2	11090056	T	C	PASS	missense_variant	MODERATE	KCNE2	101086335	transcript	XM_006935910.4	protein_coding	3	c.181A>G	p.Ile61Val
chrC2	11090056	T	C	PASS	missense_variant	MODERATE	KCNE2	101086335	transcript	XM_023238774.1	protein_coding	5	c.181A>G	p.Ile61Val
chrC2	11090056	T	C	PASS	missense_variant	MODERATE	KCNE2	101086335	transcript	XM_023238775.1	protein_coding	4	c.181A>G	p.Ile61Val
chrC2	11090056	T	C	PASS	missense_variant	MODERATE	KCNE2	101086335	transcript	XM_023238776.1	protein_coding	4	c.181A>G	p.Ile61Val
chrC2	11090056	T	C	PASS	missense_variant	MODERATE	KCNE2	101086335	transcript	XM_023238773.1	protein_coding	3	c.235A>G	p.Ile79Val
chrC2	11090115	T	C	PASS	missense_variant	MODERATE	KCNE2	101086335	transcript	XM_019839406.2	protein_coding	5	c.179A>G	p.Asp60Gly
chrC2	11090115	T	C	PASS	missense_variant	MODERATE	KCNE2	101086335	transcript	XM_006935910.4	protein_coding	3	c.122A>G	p.Asp41Gly
chrC2	11090115	T	C	PASS	missense_variant	MODERATE	KCNE2	101086335	transcript	XM_023238774.1	protein_coding	5	c.122A>G	p.Asp41Gly
chrC2	11090115	T	C	PASS	missense_variant	MODERATE	KCNE2	101086335	transcript	XM_023238775.1	protein_coding	4	c.122A>G	p.Asp41Gly
chrC2	11090115	T	C	PASS	missense_variant	MODERATE	KCNE2	101086335	transcript	XM_023238776.1	protein_coding	4	c.122A>G	p.Asp41Gly
chrC2	11090115	T	C	PASS	missense_variant	MODERATE	KCNE2	101086335	transcript	XM_023238773.1	protein_coding	3	c.176A>G	p.Asp59Gly
chrC2	11121604	G	A	PASS	missense_variant	MODERATE	KCNE2	101086335	transcript	XM_019839406.2	protein_coding	4	c.55C>T	p.His19Tyr
chrC2	11121604	G	A	PASS	missense_variant	MODERATE	KCNE2	101086335	transcript	XM_023238773.1	protein_coding	2	c.52C>T	p.His18Tyr
chrC2	11121611	C	T	PASS	splice_acceptor_variant&intron_variant	HIGH	KCNE2	101086335	transcript	XM_019839406.2	protein_coding	3	c.49-1G>A
chrC2	11121611	C	T	PASS	splice_acceptor_variant&intron_variant	HIGH	KCNE2	101086335	transcript	XM_006935910.4	protein_coding	1	c.-9-1G>A
chrC2	11121611	C	T	PASS	splice_acceptor_variant&intron_variant	HIGH	KCNE2	101086335	transcript	XM_023238774.1	protein_coding	3	c.-9-1G>A
chrC2	11121611	C	T	PASS	splice_acceptor_variant&intron_variant	HIGH	KCNE2	101086335	transcript	XM_023238775.1	protein_coding	2	c.-9-1G>A
chrC2	11121611	C	T	PASS	splice_acceptor_variant&intron_variant	HIGH	KCNE2	101086335	transcript	XM_023238776.1	protein_coding	2	c.-9-1G>A
chrC2	11121611	C	T	PASS	splice_acceptor_variant&intron_variant	HIGH	KCNE2	101086335	transcript	XM_023238773.1	protein_coding	1	c.46-1G>A
chrC2	11121611	C	T	PASS	splice_acceptor_variant&intron_variant	HIGH	KCNE2	101086335	transcript	XR_002735791.1	pseudogene	3	n.1227-1G>A
chrC2	97801499	G	A	PASS	missense_variant	MODERATE	SLC7A14	101086497	transcript	XM_006936269.4	protein_coding	7	c.1442G>A	p.Cys481Tyr
chrC2	111538810	T	C	PASS	missense_variant	MODERATE	PLCH1	101087261	transcript	XM_019810535.2	protein_coding	24	c.3584T>C	p.Ile1195Thr
chrC2	111538810	T	C	PASS	missense_variant	MODERATE	PLCH1	101087261	transcript	XM_019810538.2	protein_coding	24	c.3581T>C	p.Ile1194Thr
chrC2	111538810	T	C	PASS	missense_variant	MODERATE	PLCH1	101087261	transcript	XM_019810540.2	protein_coding	23	c.3524T>C	p.Ile1175Thr
chrC2	111538810	T	C	PASS	missense_variant	MODERATE	PLCH1	101087261	transcript	XM_003991977.5	protein_coding	23	c.3503T>C	p.Ile1168Thr
chrC2	111538810	T	C	PASS	missense_variant	MODERATE	PLCH1	101087261	transcript	XM_006936314.4	protein_coding	24	c.3563T>C	p.Ile1188Thr
chrC2	111538810	T	C	PASS	missense_variant	MODERATE	PLCH1	101087261	transcript	XM_023260450.1	protein_coding	23	c.3500T>C	p.Ile1167Thr
chrC2	111538810	T	C	PASS	missense_variant	MODERATE	PLCH1	101087261	transcript	XM_019810537.2	protein_coding	24	c.3584T>C	p.Ile1195Thr
chrC2	111538810	T	C	PASS	missense_variant	MODERATE	PLCH1	101087261	transcript	XM_019810536.2	protein_coding	25	c.3584T>C	p.Ile1195Thr
chrC2	111538810	T	C	PASS	missense_variant	MODERATE	PLCH1	101087261	transcript	XM_019810539.2	protein_coding	23	c.3548T>C	p.Ile1183Thr
chrC2	111539478	C	T	PASS	missense_variant	MODERATE	PLCH1	101087261	transcript	XM_019810535.2	protein_coding	24	c.4252C>T	p.His1418Tyr
chrC2	111539478	C	T	PASS	missense_variant	MODERATE	PLCH1	101087261	transcript	XM_019810538.2	protein_coding	24	c.4249C>T	p.His1417Tyr
chrC2	111539478	C	T	PASS	missense_variant	MODERATE	PLCH1	101087261	transcript	XM_019810540.2	protein_coding	23	c.4192C>T	p.His1398Tyr
chrC2	111539478	C	T	PASS	missense_variant	MODERATE	PLCH1	101087261	transcript	XM_003991977.5	protein_coding	23	c.4171C>T	p.His1391Tyr
chrC2	111539478	C	T	PASS	missense_variant	MODERATE	PLCH1	101087261	transcript	XM_006936314.4	protein_coding	24	c.4231C>T	p.His1411Tyr
chrC2	111539478	C	T	PASS	missense_variant	MODERATE	PLCH1	101087261	transcript	XM_023260450.1	protein_coding	23	c.4168C>T	p.His1390Tyr
chrC2	111539478	C	T	PASS	missense_variant	MODERATE	PLCH1	101087261	transcript	XM_019810537.2	protein_coding	24	c.4252C>T	p.His1418Tyr
chrC2	111539478	C	T	PASS	missense_variant	MODERATE	PLCH1	101087261	transcript	XM_019810536.2	protein_coding	25	c.4252C>T	p.His1418Tyr
chrC2	111539478	C	T	PASS	missense_variant	MODERATE	PLCH1	101087261	transcript	XM_019810539.2	protein_coding	23	c.4216C>T	p.His1406Tyr
chrC2	111539861	G	T	PASS	missense_variant	MODERATE	PLCH1	101087261	transcript	XM_019810535.2	protein_coding	24	c.4635G>T	p.Lys1545Asn
chrC2	111539861	G	T	PASS	missense_variant	MODERATE	PLCH1	101087261	transcript	XM_019810538.2	protein_coding	24	c.4632G>T	p.Lys1544Asn
chrC2	111539861	G	T	PASS	missense_variant	MODERATE	PLCH1	101087261	transcript	XM_019810540.2	protein_coding	23	c.4575G>T	p.Lys1525Asn
chrC2	111539861	G	T	PASS	missense_variant	MODERATE	PLCH1	101087261	transcript	XM_003991977.5	protein_coding	23	c.4554G>T	p.Lys1518Asn
chrC2	111539861	G	T	PASS	missense_variant	MODERATE	PLCH1	101087261	transcript	XM_006936314.4	protein_coding	24	c.4614G>T	p.Lys1538Asn
chrC2	111539861	G	T	PASS	missense_variant	MODERATE	PLCH1	101087261	transcript	XM_023260450.1	protein_coding	23	c.4551G>T	p.Lys1517Asn
chrC2	111539861	G	T	PASS	missense_variant	MODERATE	PLCH1	101087261	transcript	XM_019810537.2	protein_coding	24	c.4635G>T	p.Lys1545Asn
chrC2	111539861	G	T	PASS	missense_variant	MODERATE	PLCH1	101087261	transcript	XM_019810536.2	protein_coding	25	c.4635G>T	p.Lys1545Asn
chrC2	111539861	G	T	PASS	missense_variant	MODERATE	PLCH1	101087261	transcript	XM_019810539.2	protein_coding	23	c.4599G>T	p.Lys1533Asn
chrC2	155726933	T	C	PASS	missense_variant	MODERATE	GOLGA4	101091044	transcript	XM_023260754.1	protein_coding	15	c.1691A>G	p.Gln564Arg
chrC2	155726933	T	C	PASS	missense_variant	MODERATE	GOLGA4	101091044	transcript	XM_023260755.1	protein_coding	15	c.1691A>G	p.Gln564Arg
chrC2	155726933	T	C	PASS	missense_variant	MODERATE	GOLGA4	101091044	transcript	XM_023260756.1	protein_coding	14	c.1631A>G	p.Gln544Arg
chrC2	155726933	T	C	PASS	missense_variant	MODERATE	GOLGA4	101091044	transcript	XM_023260757.1	protein_coding	14	c.1607A>G	p.Gln536Arg
chrC2	155726933	T	C	PASS	missense_variant	MODERATE	GOLGA4	101091044	transcript	XM_023260758.1	protein_coding	14	c.1592A>G	p.Gln531Arg
chrC2	155726933	T	C	PASS	missense_variant	MODERATE	GOLGA4	101091044	transcript	XM_023260759.1	protein_coding	13	c.1532A>G	p.Gln511Arg
chrC2	155726933	T	C	PASS	missense_variant	MODERATE	GOLGA4	101091044	transcript	XM_023260760.1	protein_coding	14	c.1592A>G	p.Gln531Arg
chrD1	6756075	C	T	PASS	missense_variant	MODERATE	ATM	101089291	transcript	XM_019811239.2	protein_coding	20	c.2744C>T	p.Thr915Ile
chrD1	6756075	C	T	PASS	missense_variant	MODERATE	ATM	101089291	transcript	XM_023239067.1	protein_coding	20	c.2744C>T	p.Thr915Ile
chrD1	6756075	C	T	PASS	missense_variant	MODERATE	ATM	101089291	transcript	XM_019811246.2	protein_coding	20	c.2744C>T	p.Thr915Ile
chrD1	6756075	C	T	PASS	missense_variant	MODERATE	ATM	101089291	transcript	XM_019811247.2	protein_coding	20	c.2744C>T	p.Thr915Ile
chrD1	6756075	C	T	PASS	missense_variant	MODERATE	ATM	101089291	transcript	XM_019811245.2	protein_coding	20	c.2744C>T	p.Thr915Ile
chrD1	6756075	C	T	PASS	missense_variant	MODERATE	ATM	101089291	transcript	XM_019811240.2	protein_coding	20	c.2744C>T	p.Thr915Ile
chrD1	6756075	C	T	PASS	missense_variant	MODERATE	ATM	101089291	transcript	XM_019811241.2	protein_coding	20	c.2744C>T	p.Thr915Ile
chrD1	6756075	C	T	PASS	missense_variant	MODERATE	ATM	101089291	transcript	XM_019811242.2	protein_coding	20	c.2744C>T	p.Thr915Ile
chrD1	6756075	C	T	PASS	missense_variant	MODERATE	ATM	101089291	transcript	XM_019811243.2	protein_coding	20	c.2744C>T	p.Thr915Ile
chrD1	6756075	C	T	PASS	missense_variant	MODERATE	ATM	101089291	transcript	XM_023239066.1	protein_coding	14	c.2303C>T	p.Thr768Ile
chrD1	6770437	G	A	PASS	missense_variant	MODERATE	ATM	101089291	transcript	XM_019811239.2	protein_coding	26	c.3413G>A	p.Arg1138Lys
chrD1	6770437	G	A	PASS	missense_variant	MODERATE	ATM	101089291	transcript	XM_023239067.1	protein_coding	26	c.3413G>A	p.Arg1138Lys
chrD1	6770437	G	A	PASS	missense_variant	MODERATE	ATM	101089291	transcript	XM_019811246.2	protein_coding	26	c.3413G>A	p.Arg1138Lys
chrD1	6770437	G	A	PASS	missense_variant	MODERATE	ATM	101089291	transcript	XM_019811247.2	protein_coding	26	c.3413G>A	p.Arg1138Lys
chrD1	6770437	G	A	PASS	missense_variant	MODERATE	ATM	101089291	transcript	XM_019811245.2	protein_coding	26	c.3413G>A	p.Arg1138Lys
chrD1	6770437	G	A	PASS	missense_variant	MODERATE	ATM	101089291	transcript	XM_019811240.2	protein_coding	26	c.3413G>A	p.Arg1138Lys
chrD1	6770437	G	A	PASS	missense_variant	MODERATE	ATM	101089291	transcript	XM_019811241.2	protein_coding	26	c.3413G>A	p.Arg1138Lys
chrD1	6770437	G	A	PASS	missense_variant	MODERATE	ATM	101089291	transcript	XM_019811242.2	protein_coding	26	c.3410G>A	p.Arg1137Lys
chrD1	6770437	G	A	PASS	missense_variant	MODERATE	ATM	101089291	transcript	XM_019811243.2	protein_coding	26	c.3413G>A	p.Arg1138Lys
chrD1	6770437	G	A	PASS	missense_variant	MODERATE	ATM	101089291	transcript	XM_023239066.1	protein_coding	20	c.2972G>A	p.Arg991Lys
chrD1	12252904	A	G	PASS	missense_variant	MODERATE	CD1H11orf71	101100503	transcript	XM_003992451.5	protein_coding	2	c.311T>C	p.Val104Ala
chrD1	12260427	C	T	PASS	missense_variant	MODERATE	RBM7	101083445	transcript	XM_023239123.1	protein_coding	5	c.613C>T	p.Arg205Cys
chrD1	12394275	C	A	PASS	missense_variant	MODERATE	LOC101100996	101100996	transcript	XM_023239033.1	protein_coding	8	c.1241G>T	p.Ser414Ile
chrD1	12613515	T	A	PASS	missense_variant	MODERATE	NXPE2	101101501	transcript	XM_023238980.1	protein_coding	3	c.327T>A	p.His109Gln
chrD1	12613592	A	G	PASS	missense_variant	MODERATE	NXPE2	101101501	transcript	XM_023238980.1	protein_coding	3	c.404A>G	p.Asp135Gly
chrD1	12613864	G	A	PASS	missense_variant	MODERATE	NXPE2	101101501	transcript	XM_023238980.1	protein_coding	5	c.673G>A	p.Ala225Thr
chrD1	17801584	A	C	PASS	missense_variant	MODERATE	ARHGEF12	101085657	transcript	XM_006936730.4	protein_coding	39	c.4355A>C	p.Gln1452Pro
chrD1	17801584	A	C	PASS	missense_variant	MODERATE	ARHGEF12	101085657	transcript	XM_019811430.2	protein_coding	38	c.4235A>C	p.Gln1412Pro
chrD1	17801584	A	C	PASS	missense_variant	MODERATE	ARHGEF12	101085657	transcript	XM_006936731.4	protein_coding	38	c.4298A>C	p.Gln1433Pro
chrD1	17801584	A	C	PASS	missense_variant	MODERATE	ARHGEF12	101085657	transcript	XM_023239192.1	protein_coding	38	c.4046A>C	p.Gln1349Pro
chrD1	17801584	A	C	PASS	missense_variant	MODERATE	ARHGEF12	101085657	transcript	XM_023239193.1	protein_coding	37	c.4046A>C	p.Gln1349Pro
chrD1	38339783	C	T	PASS	stop_gained	HIGH	LOC101100411	101100411	transcript	XM_023239317.1	protein_coding	1	c.16C>T	p.Gln6*
chrD1	38339822	A	C	PASS	missense_variant	MODERATE	LOC101100411	101100411	transcript	XM_023239317.1	protein_coding	1	c.55A>C	p.Asn19His
chrD1	38339979	C	T	QD2	missense_variant	MODERATE	LOC101100411	101100411	transcript	XM_023239317.1	protein_coding	1	c.212C>T	p.Ala71Val
chrD1	38339989	A	T	QD2	missense_variant	MODERATE	LOC101100411	101100411	transcript	XM_023239317.1	protein_coding	1	c.222A>T	p.Gln74His
chrD1	45100074	AAAG	A	PASS	disruptive_inframe_deletion	MODERATE	CHORDC1	101088951	transcript	XM_003992634.5	protein_coding	11	c.984_986delAGA	p.Glu328del
chrD1	45128404	GT	G	PASS	splice_donor_variant&intron_variant	HIGH	LOC109491925	109491925	transcript	XR_002145556.1	pseudogene	1	n.803+2delT
chrD1	45221948	G	T	PASS	missense_variant	MODERATE	UBTFL1	101090136	transcript	XM_006936859.3	protein_coding	1	c.1223C>A	p.Ala408Glu
chrD1	45221978	T	C	PASS	missense_variant	MODERATE	UBTFL1	101090136	transcript	XM_006936859.3	protein_coding	1	c.1193A>G	p.Asn398Ser
chrD1	45222026	C	T	PASS	missense_variant	MODERATE	UBTFL1	101090136	transcript	XM_006936859.3	protein_coding	1	c.1145G>A	p.Ser382Asn
chrD1	45222176	A	C	PASS	missense_variant	MODERATE	UBTFL1	101090136	transcript	XM_006936859.3	protein_coding	1	c.995T>G	p.Leu332Arg
chrD1	45222182	A	C	PASS	missense_variant	MODERATE	UBTFL1	101090136	transcript	XM_006936859.3	protein_coding	1	c.989T>G	p.Met330Arg
chrD1	45222185	C	G	PASS	missense_variant	MODERATE	UBTFL1	101090136	transcript	XM_006936859.3	protein_coding	1	c.986G>C	p.Gly329Ala
chrD1	45222189	A	G	PASS	missense_variant	MODERATE	UBTFL1	101090136	transcript	XM_006936859.3	protein_coding	1	c.982T>C	p.Ser328Pro
chrD1	45222210	G	C	PASS	missense_variant	MODERATE	UBTFL1	101090136	transcript	XM_006936859.3	protein_coding	1	c.961C>G	p.Arg321Gly
chrD1	45222263	T	C	PASS	missense_variant	MODERATE	UBTFL1	101090136	transcript	XM_006936859.3	protein_coding	1	c.908A>G	p.Tyr303Cys
chrD1	45222281	T	G	PASS	missense_variant	MODERATE	UBTFL1	101090136	transcript	XM_006936859.3	protein_coding	1	c.890A>C	p.Asp297Ala
chrD1	45222411	T	C	PASS	missense_variant	MODERATE	UBTFL1	101090136	transcript	XM_006936859.3	protein_coding	1	c.760A>G	p.Ser254Gly
chrD1	45222446	C	T	PASS	missense_variant	MODERATE	UBTFL1	101090136	transcript	XM_006936859.3	protein_coding	1	c.725G>A	p.Arg242Gln
chrD1	45222934	G	T	PASS	missense_variant	MODERATE	UBTFL1	101090136	transcript	XM_006936859.3	protein_coding	1	c.237C>A	p.Asp79Glu
chrD1	45244659	A	G	PASS	missense_variant	MODERATE	LOC101090384	101090384	transcript	XM_023239345.1	protein_coding	1	c.77A>G	p.Lys26Arg
chrD1	45244709	C	G	PASS	missense_variant	MODERATE	LOC101090384	101090384	transcript	XM_023239345.1	protein_coding	1	c.127C>G	p.His43Asp
chrD1	45245218	TACTGACTTTTTTTTTTTCTGTTTCTCTTTGCAGCATTTTGAAAAC	T	PASS	splice_acceptor_variant&conservative_inframe_deletion&splice_region_variant&intron_variant	HIGH	LOC101090384	101090384	transcript	XM_023239345.1	protein_coding	2	c.208-33_219delACTGACTTTTTTTTTTTCTGTTTCTCTTTGCAGCATTTTGAAAAC	p.His70_Thr74del
chrD1	45246240	A	G	PASS	missense_variant	MODERATE	LOC101090384	101090384	transcript	XM_023239345.1	protein_coding	3	c.320A>G	p.His107Arg
chrD1	45257163	C	G	PASS	missense_variant	MODERATE	LOC101090641	101090641	transcript	XM_003992640.1	protein_coding	6	c.1166G>C	p.Cys389Ser
chrD1	45264822	A	C	PASS	missense_variant	MODERATE	LOC101090641	101090641	transcript	XM_003992640.1	protein_coding	1	c.101T>G	p.Phe34Cys
chrD1	45319973	AG	A	PASS	frameshift_variant	HIGH	LOC101091141	101091141	transcript	XM_023239346.1	protein_coding	4	c.798delC	p.Leu268fs
chrD1	45319982	G	A	PASS	missense_variant	MODERATE	LOC101091141	101091141	transcript	XM_023239346.1	protein_coding	4	c.790C>T	p.Leu264Phe
chrD1	45321464	T	C	PASS	missense_variant	MODERATE	LOC101091141	101091141	transcript	XM_023239346.1	protein_coding	3	c.320A>G	p.His107Arg
chrD1	45322437	AAGTGTTTTCAAAATGCTGCAAAGAGAAACAGAAAAAAAAAAAAAAACTC	A	QD2	splice_acceptor_variant&conservative_inframe_deletion&splice_region_variant&intron_variant	HIGH	LOC101091141	101091141	transcript	XM_023239346.1	protein_coding	2	c.208-34_222delGAGTTTTTTTTTTTTTTTCTGTTTCTCTTTGCAGCATTTTGAAAACACT	p.His70_Leu75del
chrD1	45322999	G	C	PASS	missense_variant	MODERATE	LOC101091141	101091141	transcript	XM_023239346.1	protein_coding	1	c.127C>G	p.His43Asp
chrD1	45358871	C	G	PASS	missense_variant	MODERATE	LOC101091395	101091395	transcript	XM_023239347.1	protein_coding	7	c.1283G>C	p.Cys428Ser
chrD1	45359250	C	G	PASS	missense_variant	MODERATE	LOC101091395	101091395	transcript	XM_023239347.1	protein_coding	7	c.904G>C	p.Gly302Arg
chrD1	45362905	A	G	PASS	missense_variant	MODERATE	LOC101091395	101091395	transcript	XM_023239347.1	protein_coding	4	c.583T>C	p.Cys195Arg
chrD1	45364935	C	G	PASS	missense_variant	MODERATE	LOC101091395	101091395	transcript	XM_023239347.1	protein_coding	2	c.282G>C	p.Glu94Asp
chrD1	45365064	C	A	PASS	missense_variant	MODERATE	LOC101091395	101091395	transcript	XM_023239347.1	protein_coding	2	c.153G>T	p.Gln51His
chrD1	45365194	T	A	PASS	missense_variant	MODERATE	LOC101091395	101091395	transcript	XM_023239347.1	protein_coding	2	c.23A>T	p.Asp8Val
chrD1	45442342	C	G	PASS	missense_variant	MODERATE	FOLH1B	101089641	transcript	XM_011286535.3	protein_coding	3	c.292G>C	p.Glu98Gln
chrD1	45442342	C	G	PASS	missense_variant	MODERATE	FOLH1B	101089641	transcript	XM_019811660.2	protein_coding	3	c.292G>C	p.Glu98Gln
chrD1	45442342	C	G	PASS	missense_variant	MODERATE	FOLH1B	101089641	transcript	XM_019811662.2	protein_coding	3	c.52G>C	p.Glu18Gln
chrD1	45442342	C	G	PASS	missense_variant	MODERATE	FOLH1B	101089641	transcript	XM_006936858.3	protein_coding	3	c.292G>C	p.Glu98Gln
chrD1	45442342	C	G	PASS	missense_variant	MODERATE	FOLH1B	101089641	transcript	XM_011286537.3	protein_coding	3	c.292G>C	p.Glu98Gln
chrD1	45448986	G	A	PASS	missense_variant	MODERATE	FOLH1B	101089641	transcript	XM_011286535.3	protein_coding	1	c.80C>T	p.Ala27Val
chrD1	45448986	G	A	PASS	missense_variant	MODERATE	FOLH1B	101089641	transcript	XM_019811660.2	protein_coding	1	c.80C>T	p.Ala27Val
chrD1	45448986	G	A	PASS	missense_variant	MODERATE	FOLH1B	101089641	transcript	XM_006936858.3	protein_coding	1	c.80C>T	p.Ala27Val
chrD1	45448986	G	A	PASS	missense_variant	MODERATE	FOLH1B	101089641	transcript	XM_011286537.3	protein_coding	1	c.80C>T	p.Ala27Val
chrD1	45601985	T	G	PASS	missense_variant&splice_region_variant	MODERATE	NOX4	101089891	transcript	XM_011286538.3	protein_coding	2	c.60T>G	p.Phe20Leu
chrD1	45628946	C	G	PASS	missense_variant	MODERATE	NOX4	101089891	transcript	XM_011286538.3	protein_coding	5	c.440C>G	p.Pro147Arg
chrD1	45628946	C	G	PASS	missense_variant	MODERATE	NOX4	101089891	transcript	XM_011286539.3	protein_coding	5	c.218C>G	p.Pro73Arg
chrD1	45628946	C	G	PASS	missense_variant	MODERATE	NOX4	101089891	transcript	XM_019811663.2	protein_coding	5	c.296C>G	p.Pro99Arg
chrD1	45628946	C	G	PASS	missense_variant	MODERATE	NOX4	101089891	transcript	XM_011286540.3	protein_coding	4	c.218C>G	p.Pro73Arg
chrD1	45628946	C	G	PASS	missense_variant	MODERATE	NOX4	101089891	transcript	XM_019811664.2	protein_coding	4	c.218C>G	p.Pro73Arg
chrD1	45663868	G	A	PASS	missense_variant	MODERATE	NOX4	101089891	transcript	XM_011286538.3	protein_coding	9	c.743G>A	p.Arg248His
chrD1	45663868	G	A	PASS	missense_variant	MODERATE	NOX4	101089891	transcript	XM_011286539.3	protein_coding	9	c.521G>A	p.Arg174His
[truncated: 5,469 more rows]

## Sheet: priv.hom.prot.chang.var. case 2
Table S4. 15 protein changing private variants in the sequenced shorthair cat of unknown breed (case no. 2) with EDS. Private variants were obtained by filtering all variants that were present at least once in 54 control genomes. Variants are listed multiple times, if they have predicted effects on more than one transcript. Variants with a SnpEff predicted impact of "high" or "moderate" were cons…
#CHROM	POS	REF	ALT	FILTER	EFFECT	IMPACT	GENE	GENEID	FEATURE	FEATUREID	BIOTYPE	RANK	HGVS_C	HGVS_P
chrA2	76891209	G	T	PASS	stop_gained	HIGH	VPS41	101099788	transcript	XM_006929098.3	protein_coding	11	c.874G>T	p.Glu292*
chrA2	76891209	G	T	PASS	stop_gained	HIGH	VPS41	101099788	transcript	XM_006929099.4	protein_coding	5	c.400G>T	p.Glu134*
chrA2	102457727	C	T	PASS	missense_variant	MODERATE	ASNS	101096050	transcript	XM_006929200.4	protein_coding	7	c.718G>A	p.Asp240Asn
chrA2	102457727	C	T	PASS	missense_variant	MODERATE	ASNS	101096050	transcript	XM_023250370.1	protein_coding	5	c.718G>A	p.Asp240Asn
chrA2	102457727	C	T	PASS	missense_variant	MODERATE	ASNS	101096050	transcript	XM_006929201.4	protein_coding	8	c.718G>A	p.Asp240Asn
chrA2	130142121	C	T	PASS	missense_variant	MODERATE	LOC111557442	111557442	transcript	XM_023242188.1	protein_coding	2	c.826G>A	p.Glu276Lys
chrB2	33227447	T	C	PASS	missense_variant	MODERATE	LOC111560583	111560583	transcript	XM_023254713.1	protein_coding	3	c.410T>C	p.Leu137Ser
chrB3	1450394	G	C	PASS	missense_variant	MODERATE	BCL2A1	101086480	transcript	XM_019831763.2	protein_coding	7	c.952C>G	p.Leu318Val
chrB3	1450394	G	C	PASS	missense_variant	MODERATE	BCL2A1	101086480	transcript	XM_019831764.2	protein_coding	6	c.952C>G	p.Leu318Val
chrB4	141226673	ACCC	A	PASS	disruptive_inframe_deletion	MODERATE	LOC111561468	111561468	transcript	XM_023257786.1	protein_coding	5	c.510_512delCCC	p.Pro171del
chrB4	141226683	GC	G	PASS	frameshift_variant	HIGH	LOC111561468	111561468	transcript	XM_023257786.1	protein_coding	5	c.519delC	p.Cys174fs
chrC1	44641558	C	G	PASS	missense_variant	MODERATE	PARS2	101098477	transcript	XM_006934768.3	protein_coding	3	c.971G>C	p.Gly324Ala
chrC2	111290498	G	C	PASS	splice_donor_variant&intron_variant	HIGH	CC2H3orf33	101087001	transcript	XM_023260449.1	protein_coding	1	c.-16+1G>C
chrD2	9089329	G	T	PASS	missense_variant	MODERATE	LOC101100417	101100417	transcript	XM_019814119.2	protein_coding	3	c.58G>T	p.Val20Leu
chrE1	2417202	TCCCAGCTACTCCCCGACCTCTCCCAGCTACTCTCCCACTTCTCCCAGCTACTCCCCGACCTCTCCCAGCTACTCCCCCACATCC	T	PASS	disruptive_inframe_deletion	MODERATE	POLR2A	101098500	transcript	XM_023243607.1	protein_coding	30	c.5049_5132delTCCCACTTCTCCCAGCTACTCCCCGACCTCTCCCAGCTACTCCCCCACATCCCCCAGCTACTCCCCGACCTCTCCCAGCTACTC	p.Pro1684_Ser1711del
chrE2	12966794	C	T	PASS	missense_variant	MODERATE	LOC101082109	101082109	transcript	XM_023245941.1	protein_coding	5	c.866C>T	p.Ala289Val
chrE3	7537344	G	C	PASS	missense_variant	MODERATE	PVRIG	101099421	transcript	XM_023246506.1	protein_coding	2	c.805G>C	p.Ala269Pro
chrF2	52157995	G	A	PASS	missense_variant	MODERATE	LRP12	101085269	transcript	XM_011291428.3	protein_coding	5	c.611C>T	p.Ala204Val
chrF2	52157995	G	A	PASS	missense_variant	MODERATE	LRP12	101085269	transcript	XM_011291429.3	protein_coding	4	c.554C>T	p.Ala185Val
NW_019365498.1	32027	A	AG	PASS	splice_acceptor_variant&splice_donor_variant&intron_variant	HIGH	LOC111559138	111559138	transcript	XM_023249703.1	protein_coding	3	c.559_559+1insG

## Sheet: priv.het.prot.chang.var. case 2
Table S4. 880 protein changing private variants in the sequenced shorthair cat of unknown breed (case no. 2) with EDS. Private variants were obtained by filtering all variants that were present at least once in 54 control genomes. Variants are listed multiple times, if they have predicted effects on more than one transcript. Variants with a SnpEff predicted impact of "high" or "moderate" were con…
#CHROM	POS	REF	ALT	FILTER	EFFECT	IMPACT	GENE	GENEID	FEATURE	FEATUREID	BIOTYPE	RANK	HGVS_C	HGVS_P
chrA1	779950	A	T	PASS	splice_acceptor_variant&intron_variant	HIGH	MPHOSPH8	101081515	transcript	XM_011282719.3	protein_coding	2	c.379-2A>T
chrA1	779950	A	T	PASS	splice_acceptor_variant&intron_variant	HIGH	MPHOSPH8	101081515	transcript	XM_019815491.2	protein_coding	2	c.379-2A>T
chrA1	779950	A	T	PASS	splice_acceptor_variant&intron_variant	HIGH	MPHOSPH8	101081515	transcript	XM_019815407.2	protein_coding	2	c.379-2A>T
chrA1	779951	G	T	PASS	splice_acceptor_variant&intron_variant	HIGH	MPHOSPH8	101081515	transcript	XM_011282719.3	protein_coding	2	c.379-1G>T
chrA1	779951	G	T	PASS	splice_acceptor_variant&intron_variant	HIGH	MPHOSPH8	101081515	transcript	XM_019815491.2	protein_coding	2	c.379-1G>T
chrA1	779951	G	T	PASS	splice_acceptor_variant&intron_variant	HIGH	MPHOSPH8	101081515	transcript	XM_019815407.2	protein_coding	2	c.379-1G>T
chrA1	3985851	AGT	A	QD2	frameshift_variant	HIGH	SACS	101095068	transcript	XM_006927166.4	protein_coding	10	c.9084_9085delAC	p.Leu3028fs
chrA1	3985855	AGTTGTC	A	QD2	conservative_inframe_deletion	MODERATE	SACS	101095068	transcript	XM_006927166.4	protein_coding	10	c.9076_9081delGACAAC	p.Asp3026_Asn3027del
chrA1	6922183	G	C	PASS	missense_variant	MODERATE	LOC111559476	111559476	transcript	XM_023250247.1	protein_coding	1	c.197G>C	p.Arg66Pro
chrA1	6922401	T	C	PASS	missense_variant	MODERATE	LOC111559476	111559476	transcript	XM_023250247.1	protein_coding	1	c.415T>C	p.Ser139Pro
chrA1	7117283	C	T	PASS	missense_variant	MODERATE	MTIF3	101087290	transcript	XM_006927181.4	protein_coding	4	c.170G>A	p.Arg57Gln
chrA1	7117283	C	T	PASS	missense_variant	MODERATE	MTIF3	101087290	transcript	XM_006927182.4	protein_coding	4	c.170G>A	p.Arg57Gln
chrA1	7117283	C	T	PASS	missense_variant	MODERATE	MTIF3	101087290	transcript	XM_006927183.4	protein_coding	3	c.107G>A	p.Arg36Gln
chrA1	7117283	C	T	PASS	missense_variant	MODERATE	MTIF3	101087290	transcript	XM_003980268.4	protein_coding	2	c.107G>A	p.Arg36Gln
chrA1	7117283	C	T	PASS	missense_variant	MODERATE	MTIF3	101087290	transcript	XM_023250294.1	protein_coding	2	c.137G>A	p.Arg46Gln
chrA1	7244056	C	T	PASS	missense_variant	MODERATE	LNX2	101087544	transcript	XM_003980269.5	protein_coding	2	c.73G>A	p.Glu25Lys
chrA1	7244056	C	T	PASS	missense_variant	MODERATE	LNX2	101087544	transcript	XM_023250306.1	protein_coding	2	c.73G>A	p.Glu25Lys
chrA1	7244056	C	T	PASS	missense_variant	MODERATE	LNX2	101087544	transcript	XM_023250304.1	protein_coding	2	c.73G>A	p.Glu25Lys
chrA1	7244056	C	T	PASS	missense_variant	MODERATE	LNX2	101087544	transcript	XM_023250309.1	protein_coding	2	c.73G>A	p.Glu25Lys
chrA1	11584237	TAGGAGA	T	PASS	frameshift_variant&splice_acceptor_variant&splice_region_variant&intron_variant	HIGH	BRCA2	493878	transcript	XM_011283605.3	protein_coding	12	c.6698-2_6701delAGGAGA	p.Gly2233fs
chrA1	11584237	TAGGAGA	T	PASS	frameshift_variant&splice_acceptor_variant&splice_region_variant&intron_variant	HIGH	BRCA2	493878	transcript	XM_019810443.2	protein_coding	12	c.6698-2_6701delAGGAGA	p.Gly2233fs
chrA1	11584237	TAGGAGA	T	PASS	frameshift_variant&splice_acceptor_variant&splice_region_variant&intron_variant	HIGH	BRCA2	493878	transcript	XM_019839734.2	protein_coding	12	c.6677-2_6680delAGGAGA	p.Gly2226fs
chrA1	11584237	TAGGAGA	T	PASS	frameshift_variant&splice_acceptor_variant&splice_region_variant&intron_variant	HIGH	BRCA2	493878	transcript	XM_019839322.2	protein_coding	12	c.6698-2_6701delAGGAGA	p.Gly2233fs
chrA1	11584237	TAGGAGA	T	PASS	frameshift_variant&splice_acceptor_variant&splice_region_variant&intron_variant	HIGH	BRCA2	493878	transcript	NM_001009858.1	protein_coding	16	c.6671-2_6674delAGGAGA	p.Gly2224fs
chrA1	27789504	G	T	PASS	missense_variant	MODERATE	DNAJC15	101087037	transcript	XM_003980414.5	protein_coding	1	c.29C>A	p.Ala10Asp
chrA1	28440302	C	A	PASS	missense_variant	MODERATE	AKAP11	101087548	transcript	XM_006927316.2	protein_coding	7	c.1087G>T	p.Asp363Tyr
chrA1	28440302	C	A	PASS	missense_variant	MODERATE	AKAP11	101087548	transcript	XM_006927317.2	protein_coding	7	c.1087G>T	p.Asp363Tyr
chrA1	28440302	C	A	PASS	missense_variant	MODERATE	AKAP11	101087548	transcript	XM_023251888.1	protein_coding	8	c.1087G>T	p.Asp363Tyr
chrA1	28440302	C	A	PASS	missense_variant	MODERATE	AKAP11	101087548	transcript	XM_023251876.1	protein_coding	8	c.1087G>T	p.Asp363Tyr
chrA1	28440302	C	A	PASS	missense_variant	MODERATE	AKAP11	101087548	transcript	XM_023251883.1	protein_coding	7	c.1087G>T	p.Asp363Tyr
chrA1	28440302	C	A	PASS	missense_variant	MODERATE	AKAP11	101087548	transcript	XM_011290613.3	protein_coding	7	c.1087G>T	p.Asp363Tyr
chrA1	28440307	C	A	QD2	missense_variant	MODERATE	AKAP11	101087548	transcript	XM_006927316.2	protein_coding	7	c.1082G>T	p.Ser361Ile
chrA1	28440307	C	A	QD2	missense_variant	MODERATE	AKAP11	101087548	transcript	XM_006927317.2	protein_coding	7	c.1082G>T	p.Ser361Ile
chrA1	28440307	C	A	QD2	missense_variant	MODERATE	AKAP11	101087548	transcript	XM_023251888.1	protein_coding	8	c.1082G>T	p.Ser361Ile
chrA1	28440307	C	A	QD2	missense_variant	MODERATE	AKAP11	101087548	transcript	XM_023251876.1	protein_coding	8	c.1082G>T	p.Ser361Ile
chrA1	28440307	C	A	QD2	missense_variant	MODERATE	AKAP11	101087548	transcript	XM_023251883.1	protein_coding	7	c.1082G>T	p.Ser361Ile
chrA1	28440307	C	A	QD2	missense_variant	MODERATE	AKAP11	101087548	transcript	XM_011290613.3	protein_coding	7	c.1082G>T	p.Ser361Ile
chrA1	28440308	T	A	QD2	missense_variant	MODERATE	AKAP11	101087548	transcript	XM_006927316.2	protein_coding	7	c.1081A>T	p.Ser361Cys
chrA1	28440308	T	A	QD2	missense_variant	MODERATE	AKAP11	101087548	transcript	XM_006927317.2	protein_coding	7	c.1081A>T	p.Ser361Cys
chrA1	28440308	T	A	QD2	missense_variant	MODERATE	AKAP11	101087548	transcript	XM_023251888.1	protein_coding	8	c.1081A>T	p.Ser361Cys
chrA1	28440308	T	A	QD2	missense_variant	MODERATE	AKAP11	101087548	transcript	XM_023251876.1	protein_coding	8	c.1081A>T	p.Ser361Cys
chrA1	28440308	T	A	QD2	missense_variant	MODERATE	AKAP11	101087548	transcript	XM_023251883.1	protein_coding	7	c.1081A>T	p.Ser361Cys
chrA1	28440308	T	A	QD2	missense_variant	MODERATE	AKAP11	101087548	transcript	XM_011290613.3	protein_coding	7	c.1081A>T	p.Ser361Cys
chrA1	28440310	T	A	QD2	missense_variant	MODERATE	AKAP11	101087548	transcript	XM_006927316.2	protein_coding	7	c.1079A>T	p.Asp360Val
chrA1	28440310	T	A	QD2	missense_variant	MODERATE	AKAP11	101087548	transcript	XM_006927317.2	protein_coding	7	c.1079A>T	p.Asp360Val
chrA1	28440310	T	A	QD2	missense_variant	MODERATE	AKAP11	101087548	transcript	XM_023251888.1	protein_coding	8	c.1079A>T	p.Asp360Val
chrA1	28440310	T	A	QD2	missense_variant	MODERATE	AKAP11	101087548	transcript	XM_023251876.1	protein_coding	8	c.1079A>T	p.Asp360Val
chrA1	28440310	T	A	QD2	missense_variant	MODERATE	AKAP11	101087548	transcript	XM_023251883.1	protein_coding	7	c.1079A>T	p.Asp360Val
chrA1	28440310	T	A	QD2	missense_variant	MODERATE	AKAP11	101087548	transcript	XM_011290613.3	protein_coding	7	c.1079A>T	p.Asp360Val
chrA1	28440311	C	A	QD2	missense_variant	MODERATE	AKAP11	101087548	transcript	XM_006927316.2	protein_coding	7	c.1078G>T	p.Asp360Tyr
chrA1	28440311	C	A	QD2	missense_variant	MODERATE	AKAP11	101087548	transcript	XM_006927317.2	protein_coding	7	c.1078G>T	p.Asp360Tyr
chrA1	28440311	C	A	QD2	missense_variant	MODERATE	AKAP11	101087548	transcript	XM_023251888.1	protein_coding	8	c.1078G>T	p.Asp360Tyr
chrA1	28440311	C	A	QD2	missense_variant	MODERATE	AKAP11	101087548	transcript	XM_023251876.1	protein_coding	8	c.1078G>T	p.Asp360Tyr
chrA1	28440311	C	A	QD2	missense_variant	MODERATE	AKAP11	101087548	transcript	XM_023251883.1	protein_coding	7	c.1078G>T	p.Asp360Tyr
chrA1	28440311	C	A	QD2	missense_variant	MODERATE	AKAP11	101087548	transcript	XM_011290613.3	protein_coding	7	c.1078G>T	p.Asp360Tyr
chrA1	51890465	A	T	PASS	splice_acceptor_variant&intron_variant	HIGH	SCEL	101089485	transcript	XM_019828134.1	protein_coding	30	c.1975-2A>T
chrA1	51890465	A	T	PASS	splice_acceptor_variant&intron_variant	HIGH	SCEL	101089485	transcript	XM_019828151.2	protein_coding	33	c.1945-2A>T
chrA1	51890465	A	T	PASS	splice_acceptor_variant&intron_variant	HIGH	SCEL	101089485	transcript	XM_019828143.1	protein_coding	34	c.1945-2A>T
chrA1	51890465	A	T	PASS	splice_acceptor_variant&intron_variant	HIGH	SCEL	101089485	transcript	XM_019828148.1	protein_coding	33	c.1945-2A>T
chrA1	51890465	A	T	PASS	splice_acceptor_variant&intron_variant	HIGH	SCEL	101089485	transcript	XM_019828147.1	protein_coding	34	c.1945-2A>T
chrA1	51890465	A	T	PASS	splice_acceptor_variant&intron_variant	HIGH	SCEL	101089485	transcript	XM_019828178.1	protein_coding	29	c.1900-2A>T
chrA1	51890465	A	T	PASS	splice_acceptor_variant&intron_variant	HIGH	SCEL	101089485	transcript	XM_019828136.1	protein_coding	30	c.1972-2A>T
chrA1	51890465	A	T	PASS	splice_acceptor_variant&intron_variant	HIGH	SCEL	101089485	transcript	XM_019828157.1	protein_coding	29	c.1915-2A>T
chrA1	51890465	A	T	PASS	splice_acceptor_variant&intron_variant	HIGH	SCEL	101089485	transcript	XM_019828162.1	protein_coding	29	c.1915-2A>T
chrA1	51890465	A	T	PASS	splice_acceptor_variant&intron_variant	HIGH	SCEL	101089485	transcript	XM_019828164.1	protein_coding	29	c.1912-2A>T
chrA1	51890465	A	T	PASS	splice_acceptor_variant&intron_variant	HIGH	SCEL	101089485	transcript	XM_019828188.1	protein_coding	28	c.1855-2A>T
chrA1	51890465	A	T	PASS	splice_acceptor_variant&intron_variant	HIGH	SCEL	101089485	transcript	XM_019828190.1	protein_coding	28	c.1852-2A>T
chrA1	51890465	A	T	PASS	splice_acceptor_variant&intron_variant	HIGH	SCEL	101089485	transcript	XM_019828156.1	protein_coding	29	c.1915-2A>T
chrA1	51890465	A	T	PASS	splice_acceptor_variant&intron_variant	HIGH	SCEL	101089485	transcript	XM_019828184.2	protein_coding	28	c.1870-2A>T
chrA1	51890465	A	T	PASS	splice_acceptor_variant&intron_variant	HIGH	SCEL	101089485	transcript	XM_019828175.1	protein_coding	29	c.1906-2A>T
chrA1	51890465	A	T	PASS	splice_acceptor_variant&intron_variant	HIGH	SCEL	101089485	transcript	XM_019828137.1	protein_coding	30	c.1945-2A>T
chrA1	51890465	A	T	PASS	splice_acceptor_variant&intron_variant	HIGH	SCEL	101089485	transcript	XM_019828191.1	protein_coding	30	c.1945-2A>T
chrA1	51890466	G	T	PASS	splice_acceptor_variant&intron_variant	HIGH	SCEL	101089485	transcript	XM_019828134.1	protein_coding	30	c.1975-1G>T
chrA1	51890466	G	T	PASS	splice_acceptor_variant&intron_variant	HIGH	SCEL	101089485	transcript	XM_019828151.2	protein_coding	33	c.1945-1G>T
chrA1	51890466	G	T	PASS	splice_acceptor_variant&intron_variant	HIGH	SCEL	101089485	transcript	XM_019828143.1	protein_coding	34	c.1945-1G>T
chrA1	51890466	G	T	PASS	splice_acceptor_variant&intron_variant	HIGH	SCEL	101089485	transcript	XM_019828148.1	protein_coding	33	c.1945-1G>T
chrA1	51890466	G	T	PASS	splice_acceptor_variant&intron_variant	HIGH	SCEL	101089485	transcript	XM_019828147.1	protein_coding	34	c.1945-1G>T
chrA1	51890466	G	T	PASS	splice_acceptor_variant&intron_variant	HIGH	SCEL	101089485	transcript	XM_019828178.1	protein_coding	29	c.1900-1G>T
chrA1	51890466	G	T	PASS	splice_acceptor_variant&intron_variant	HIGH	SCEL	101089485	transcript	XM_019828136.1	protein_coding	30	c.1972-1G>T
chrA1	51890466	G	T	PASS	splice_acceptor_variant&intron_variant	HIGH	SCEL	101089485	transcript	XM_019828157.1	protein_coding	29	c.1915-1G>T
chrA1	51890466	G	T	PASS	splice_acceptor_variant&intron_variant	HIGH	SCEL	101089485	transcript	XM_019828162.1	protein_coding	29	c.1915-1G>T
chrA1	51890466	G	T	PASS	splice_acceptor_variant&intron_variant	HIGH	SCEL	101089485	transcript	XM_019828164.1	protein_coding	29	c.1912-1G>T
chrA1	51890466	G	T	PASS	splice_acceptor_variant&intron_variant	HIGH	SCEL	101089485	transcript	XM_019828188.1	protein_coding	28	c.1855-1G>T
chrA1	51890466	G	T	PASS	splice_acceptor_variant&intron_variant	HIGH	SCEL	101089485	transcript	XM_019828190.1	protein_coding	28	c.1852-1G>T
chrA1	51890466	G	T	PASS	splice_acceptor_variant&intron_variant	HIGH	SCEL	101089485	transcript	XM_019828156.1	protein_coding	29	c.1915-1G>T
chrA1	51890466	G	T	PASS	splice_acceptor_variant&intron_variant	HIGH	SCEL	101089485	transcript	XM_019828184.2	protein_coding	28	c.1870-1G>T
chrA1	51890466	G	T	PASS	splice_acceptor_variant&intron_variant	HIGH	SCEL	101089485	transcript	XM_019828175.1	protein_coding	29	c.1906-1G>T
chrA1	51890466	G	T	PASS	splice_acceptor_variant&intron_variant	HIGH	SCEL	101089485	transcript	XM_019828137.1	protein_coding	30	c.1945-1G>T
chrA1	51890466	G	T	PASS	splice_acceptor_variant&intron_variant	HIGH	SCEL	101089485	transcript	XM_019828191.1	protein_coding	30	c.1945-1G>T
chrA1	51890468	G	T	PASS	missense_variant&splice_region_variant	MODERATE	SCEL	101089485	transcript	XM_019828134.1	protein_coding	31	c.1976G>T	p.Cys659Phe
chrA1	51890468	G	T	PASS	missense_variant&splice_region_variant	MODERATE	SCEL	101089485	transcript	XM_019828151.2	protein_coding	34	c.1946G>T	p.Cys649Phe
chrA1	51890468	G	T	PASS	missense_variant&splice_region_variant	MODERATE	SCEL	101089485	transcript	XM_019828143.1	protein_coding	35	c.1946G>T	p.Cys649Phe
chrA1	51890468	G	T	PASS	missense_variant&splice_region_variant	MODERATE	SCEL	101089485	transcript	XM_019828148.1	protein_coding	34	c.1946G>T	p.Cys649Phe
chrA1	51890468	G	T	PASS	missense_variant&splice_region_variant	MODERATE	SCEL	101089485	transcript	XM_019828147.1	protein_coding	35	c.1946G>T	p.Cys649Phe
chrA1	51890468	G	T	PASS	missense_variant&splice_region_variant	MODERATE	SCEL	101089485	transcript	XM_019828178.1	protein_coding	30	c.1901G>T	p.Cys634Phe
chrA1	51890468	G	T	PASS	missense_variant&splice_region_variant	MODERATE	SCEL	101089485	transcript	XM_019828136.1	protein_coding	31	c.1973G>T	p.Cys658Phe
chrA1	51890468	G	T	PASS	missense_variant&splice_region_variant	MODERATE	SCEL	101089485	transcript	XM_019828157.1	protein_coding	30	c.1916G>T	p.Cys639Phe
chrA1	51890468	G	T	PASS	missense_variant&splice_region_variant	MODERATE	SCEL	101089485	transcript	XM_019828162.1	protein_coding	30	c.1916G>T	p.Cys639Phe
chrA1	51890468	G	T	PASS	missense_variant&splice_region_variant	MODERATE	SCEL	101089485	transcript	XM_019828164.1	protein_coding	30	c.1913G>T	p.Cys638Phe
chrA1	51890468	G	T	PASS	missense_variant&splice_region_variant	MODERATE	SCEL	101089485	transcript	XM_019828188.1	protein_coding	29	c.1856G>T	p.Cys619Phe
chrA1	51890468	G	T	PASS	missense_variant&splice_region_variant	MODERATE	SCEL	101089485	transcript	XM_019828190.1	protein_coding	29	c.1853G>T	p.Cys618Phe
chrA1	51890468	G	T	PASS	missense_variant&splice_region_variant	MODERATE	SCEL	101089485	transcript	XM_019828156.1	protein_coding	30	c.1916G>T	p.Cys639Phe
chrA1	51890468	G	T	PASS	missense_variant&splice_region_variant	MODERATE	SCEL	101089485	transcript	XM_019828184.2	protein_coding	29	c.1871G>T	p.Cys624Phe
chrA1	51890468	G	T	PASS	missense_variant&splice_region_variant	MODERATE	SCEL	101089485	transcript	XM_019828175.1	protein_coding	30	c.1907G>T	p.Cys636Phe
chrA1	51890468	G	T	PASS	missense_variant&splice_region_variant	MODERATE	SCEL	101089485	transcript	XM_019828137.1	protein_coding	31	c.1946G>T	p.Cys649Phe
chrA1	51890468	G	T	PASS	missense_variant&splice_region_variant	MODERATE	SCEL	101089485	transcript	XM_019828191.1	protein_coding	31	c.1946G>T	p.Cys649Phe
chrA1	51890470	G	T	PASS	stop_gained	HIGH	SCEL	101089485	transcript	XM_019828134.1	protein_coding	31	c.1978G>T	p.Glu660*
chrA1	51890470	G	T	PASS	stop_gained	HIGH	SCEL	101089485	transcript	XM_019828151.2	protein_coding	34	c.1948G>T	p.Glu650*
chrA1	51890470	G	T	PASS	stop_gained	HIGH	SCEL	101089485	transcript	XM_019828143.1	protein_coding	35	c.1948G>T	p.Glu650*
chrA1	51890470	G	T	PASS	stop_gained	HIGH	SCEL	101089485	transcript	XM_019828148.1	protein_coding	34	c.1948G>T	p.Glu650*
chrA1	51890470	G	T	PASS	stop_gained	HIGH	SCEL	101089485	transcript	XM_019828147.1	protein_coding	35	c.1948G>T	p.Glu650*
chrA1	51890470	G	T	PASS	stop_gained	HIGH	SCEL	101089485	transcript	XM_019828178.1	protein_coding	30	c.1903G>T	p.Glu635*
chrA1	51890470	G	T	PASS	stop_gained	HIGH	SCEL	101089485	transcript	XM_019828136.1	protein_coding	31	c.1975G>T	p.Glu659*
chrA1	51890470	G	T	PASS	stop_gained	HIGH	SCEL	101089485	transcript	XM_019828157.1	protein_coding	30	c.1918G>T	p.Glu640*
chrA1	51890470	G	T	PASS	stop_gained	HIGH	SCEL	101089485	transcript	XM_019828162.1	protein_coding	30	c.1918G>T	p.Glu640*
chrA1	51890470	G	T	PASS	stop_gained	HIGH	SCEL	101089485	transcript	XM_019828164.1	protein_coding	30	c.1915G>T	p.Glu639*
chrA1	51890470	G	T	PASS	stop_gained	HIGH	SCEL	101089485	transcript	XM_019828188.1	protein_coding	29	c.1858G>T	p.Glu620*
chrA1	51890470	G	T	PASS	stop_gained	HIGH	SCEL	101089485	transcript	XM_019828190.1	protein_coding	29	c.1855G>T	p.Glu619*
chrA1	51890470	G	T	PASS	stop_gained	HIGH	SCEL	101089485	transcript	XM_019828156.1	protein_coding	30	c.1918G>T	p.Glu640*
chrA1	51890470	G	T	PASS	stop_gained	HIGH	SCEL	101089485	transcript	XM_019828184.2	protein_coding	29	c.1873G>T	p.Glu625*
chrA1	51890470	G	T	PASS	stop_gained	HIGH	SCEL	101089485	transcript	XM_019828175.1	protein_coding	30	c.1909G>T	p.Glu637*
chrA1	51890470	G	T	PASS	stop_gained	HIGH	SCEL	101089485	transcript	XM_019828137.1	protein_coding	31	c.1948G>T	p.Glu650*
chrA1	51890470	G	T	PASS	stop_gained	HIGH	SCEL	101089485	transcript	XM_019828191.1	protein_coding	31	c.1948G>T	p.Glu650*
chrA1	67749826	C	T	QD2	missense_variant	MODERATE	UGGT2	101099423	transcript	XM_011280607.3	protein_coding	32	c.3592G>A	p.Glu1198Lys
chrA1	67749827	A	T	QD2	missense_variant	MODERATE	UGGT2	101099423	transcript	XM_011280607.3	protein_coding	32	c.3591T>A	p.Asp1197Glu
chrA1	67749829	C	T	QD2	missense_variant	MODERATE	UGGT2	101099423	transcript	XM_011280607.3	protein_coding	32	c.3589G>A	p.Asp1197Asn
chrA1	94516348	A	T	QD2	splice_acceptor_variant&intron_variant	HIGH	YTHDC2	101099680	transcript	XM_019830944.2	protein_coding	21	c.2837-2A>T
chrA1	94516348	A	T	QD2	splice_acceptor_variant&intron_variant	HIGH	YTHDC2	101099680	transcript	XM_019830946.1	protein_coding	19	c.2357-2A>T
chrA1	94516349	G	T	QD2	splice_acceptor_variant&intron_variant	HIGH	YTHDC2	101099680	transcript	XM_019830944.2	protein_coding	21	c.2837-1G>T
chrA1	94516349	G	T	QD2	splice_acceptor_variant&intron_variant	HIGH	YTHDC2	101099680	transcript	XM_019830946.1	protein_coding	19	c.2357-1G>T
chrA1	106469502	T	A	PASS	missense_variant	MODERATE	PHAX	101086872	transcript	XM_023254752.1	protein_coding	3	c.755T>A	p.Ile252Lys
chrA1	106469504	ATTGGG	A	PASS	frameshift_variant	HIGH	PHAX	101086872	transcript	XM_023254752.1	protein_coding	3	c.758_762delTTGGG	p.Ile253fs
chrA1	106469512	C	A	PASS	missense_variant	MODERATE	PHAX	101086872	transcript	XM_023254752.1	protein_coding	3	c.765C>A	p.Asn255Lys
chrA1	106483364	C	T	PASS	missense_variant	MODERATE	TEX43	101087127	transcript	XM_006927566.3	protein_coding	2	c.178C>T	p.Arg60Cys
chrA1	113407625	AC	A	PASS	frameshift_variant	HIGH	CDKN2AIPNL	101099927	transcript	XM_003980771.5	protein_coding	1	c.49delG	p.Val17fs
chrA1	116824157	G	T	QD2	missense_variant	MODERATE	CDC23	101086445	transcript	XM_023243003.1	protein_coding	10	c.1073C>A	p.Ala358Asp
chrA1	116824158	C	T	QD2	missense_variant	MODERATE	CDC23	101086445	transcript	XM_023243003.1	protein_coding	10	c.1072G>A	p.Ala358Thr
chrA1	116824161	C	T	QD2	missense_variant	MODERATE	CDC23	101086445	transcript	XM_023243003.1	protein_coding	10	c.1069G>A	p.Glu357Lys
chrA1	116824163	A	T	QD2	missense_variant	MODERATE	CDC23	101086445	transcript	XM_023243003.1	protein_coding	10	c.1067T>A	p.Val356Glu
chrA1	116824164	C	T	QD2	missense_variant	MODERATE	CDC23	101086445	transcript	XM_023243003.1	protein_coding	10	c.1066G>A	p.Val356Ile
chrA1	116824166	A	T	QD2	missense_variant	MODERATE	CDC23	101086445	transcript	XM_023243003.1	protein_coding	10	c.1064T>A	p.Leu355Gln
chrA1	116824167	G	T	QD2	missense_variant	MODERATE	CDC23	101086445	transcript	XM_023243003.1	protein_coding	10	c.1063C>A	p.Leu355Ile
chrA1	118212309	T	A	PASS	missense_variant	MODERATE	NRG2	101090986	transcript	XM_023255767.1	protein_coding	2	c.775A>T	p.Thr259Ser
chrA1	118212309	T	A	PASS	missense_variant	MODERATE	NRG2	101090986	transcript	XM_023255775.1	protein_coding	2	c.127A>T	p.Thr43Ser
chrA1	118212309	T	A	PASS	missense_variant	MODERATE	NRG2	101090986	transcript	XM_023255776.1	protein_coding	3	c.55A>T	p.Thr19Ser
chrA1	118212309	T	A	PASS	missense_variant	MODERATE	NRG2	101090986	transcript	XM_023255770.1	protein_coding	2	c.775A>T	p.Thr259Ser
chrA1	118212309	T	A	PASS	missense_variant	MODERATE	NRG2	101090986	transcript	XM_023255773.1	protein_coding	2	c.775A>T	p.Thr259Ser
chrA1	118212309	T	A	PASS	missense_variant	MODERATE	NRG2	101090986	transcript	XM_023255774.1	protein_coding	2	c.775A>T	p.Thr259Ser
chrA1	119478501	T	C	PASS	missense_variant	MODERATE	LOC101100942	101100942	transcript	XM_019833499.2	protein_coding	1	c.395T>C	p.Ile132Thr
chrA1	123668050	G	C	PASS	missense_variant	MODERATE	SH3RF2	101082800	transcript	XM_019833842.2	protein_coding	5	c.787G>C	p.Gly263Arg
chrA1	123668050	G	C	PASS	missense_variant	MODERATE	SH3RF2	101082800	transcript	XM_019833843.2	protein_coding	5	c.787G>C	p.Gly263Arg
chrA1	123668050	G	C	PASS	missense_variant	MODERATE	SH3RF2	101082800	transcript	XM_003980943.5	protein_coding	5	c.787G>C	p.Gly263Arg
chrA1	123668050	G	C	PASS	missense_variant	MODERATE	SH3RF2	101082800	transcript	XM_019833850.2	protein_coding	5	c.787G>C	p.Gly263Arg
chrA1	123668050	G	C	PASS	missense_variant	MODERATE	SH3RF2	101082800	transcript	XM_019833855.2	protein_coding	4	c.517G>C	p.Gly173Arg
chrA1	126567723	ATTCTGG	A	PASS	frameshift_variant&splice_acceptor_variant&splice_region_variant&intron_variant	HIGH	IL6ST	101089832	transcript	XM_011282895.2	protein_coding	17	c.1938-4_1939delCCAGAA	p.Ile647fs
chrA1	126567723	ATTCTGG	A	PASS	frameshift_variant&splice_acceptor_variant&splice_region_variant&intron_variant	HIGH	IL6ST	101089832	transcript	XM_019834335.2	protein_coding	16	c.1938-4_1939delCCAGAA	p.Ile647fs
chrA1	126567723	ATTCTGG	A	PASS	frameshift_variant&splice_acceptor_variant&splice_region_variant&intron_variant	HIGH	IL6ST	101089832	transcript	XM_019834342.2	protein_coding	16	c.1938-4_1939delCCAGAA	p.Ile647fs
chrA1	126567723	ATTCTGG	A	PASS	frameshift_variant&splice_acceptor_variant&splice_region_variant&intron_variant	HIGH	IL6ST	101089832	transcript	XM_011282898.2	protein_coding	16	c.1938-4_1939delCCAGAA	p.Ile647fs
chrA1	126567723	ATTCTGG	A	PASS	frameshift_variant&splice_acceptor_variant&splice_region_variant&intron_variant	HIGH	IL6ST	101089832	transcript	XM_011282903.3	protein_coding	15	c.1938-4_1939delCCAGAA	p.Ile647fs
chrA1	126567723	ATTCTGG	A	PASS	frameshift_variant&splice_acceptor_variant&splice_region_variant&intron_variant	HIGH	IL6ST	101089832	transcript	XM_019834355.2	protein_coding	16	c.1841-4_1842delCCAGAA	p.Glu614fs
chrA1	136383006	TAGAG	T	PASS	frameshift_variant&splice_acceptor_variant&splice_region_variant&intron_variant	HIGH	MAST4	101087553	transcript	XM_023257117.1	protein_coding	30	c.3718-2_3719delAGAG	p.Ser1240fs
chrA1	138581765	TAGCCATCAG	T	PASS	disruptive_inframe_deletion	MODERATE	BDP1	101095226	transcript	XM_011283883.2	protein_coding	7	c.942_950delAGCCATCAG	p.Leu314_Ser317delinsPhe
chrA1	138581765	TAGCCATCAG	T	PASS	disruptive_inframe_deletion	MODERATE	BDP1	101095226	transcript	XM_019835223.2	protein_coding	10	c.942_950delAGCCATCAG	p.Leu314_Ser317delinsPhe
chrA1	138581765	TAGCCATCAG	T	PASS	disruptive_inframe_deletion	MODERATE	BDP1	101095226	transcript	XM_019835227.2	protein_coding	10	c.942_950delAGCCATCAG	p.Leu314_Ser317delinsPhe
chrA1	138581765	TAGCCATCAG	T	PASS	disruptive_inframe_deletion	MODERATE	BDP1	101095226	transcript	XM_019835230.2	protein_coding	8	c.942_950delAGCCATCAG	p.Leu314_Ser317delinsPhe
chrA1	138581765	TAGCCATCAG	T	PASS	disruptive_inframe_deletion	MODERATE	BDP1	101095226	transcript	XM_019835246.2	protein_coding	7	c.942_950delAGCCATCAG	p.Leu314_Ser317delinsPhe
chrA1	138581765	TAGCCATCAG	T	PASS	disruptive_inframe_deletion	MODERATE	BDP1	101095226	transcript	XM_019835240.2	protein_coding	7	c.939_947delAGCCATCAG	p.Leu313_Ser316delinsPhe
chrA1	138581765	TAGCCATCAG	T	PASS	disruptive_inframe_deletion	MODERATE	BDP1	101095226	transcript	XM_019835244.2	protein_coding	7	c.942_950delAGCCATCAG	p.Leu314_Ser317delinsPhe
chrA1	138614717	G	C	PASS	missense_variant	MODERATE	BDP1	101095226	transcript	XM_011283883.2	protein_coding	17	c.3365G>C	p.Arg1122Thr
chrA1	138614717	G	C	PASS	missense_variant	MODERATE	BDP1	101095226	transcript	XM_019835223.2	protein_coding	20	c.3365G>C	p.Arg1122Thr
chrA1	138614717	G	C	PASS	missense_variant	MODERATE	BDP1	101095226	transcript	XM_019835227.2	protein_coding	20	c.3365G>C	p.Arg1122Thr
chrA1	138614717	G	C	PASS	missense_variant	MODERATE	BDP1	101095226	transcript	XM_019835230.2	protein_coding	18	c.3365G>C	p.Arg1122Thr
chrA1	138614717	G	C	PASS	missense_variant	MODERATE	BDP1	101095226	transcript	XM_019835246.2	protein_coding	17	c.3365G>C	p.Arg1122Thr
chrA1	138614717	G	C	PASS	missense_variant	MODERATE	BDP1	101095226	transcript	XM_019835240.2	protein_coding	17	c.3362G>C	p.Arg1121Thr
chrA1	138614717	G	C	PASS	missense_variant	MODERATE	BDP1	101095226	transcript	XM_019835244.2	protein_coding	17	c.3365G>C	p.Arg1122Thr
chrA1	143148730	A	C	PASS	missense_variant	MODERATE	F2RL2	101100615	transcript	XM_006927798.4	protein_coding	2	c.269T>G	p.Leu90Arg
chrA1	143148730	A	C	PASS	missense_variant	MODERATE	F2RL2	101100615	transcript	XM_019835776.2	protein_coding	3	c.197T>G	p.Leu66Arg
chrA1	143148730	A	C	PASS	missense_variant	MODERATE	F2RL2	101100615	transcript	XM_003981082.5	protein_coding	2	c.263T>G	p.Leu88Arg
chrA1	148092335	G	A	PASS	missense_variant	MODERATE	LOC109502094	109502094	transcript	XM_023258008.1	protein_coding	1	c.697C>T	p.Pro233Ser
chrA1	160846650	A	C	PASS	missense_variant	MODERATE	CAST	101088981	transcript	XM_011284752.3	protein_coding	31	c.2376A>C	p.Lys792Asn
chrA1	160846650	A	C	PASS	missense_variant	MODERATE	CAST	101088981	transcript	XM_023258673.1	protein_coding	31	c.2373A>C	p.Lys791Asn
chrA1	160846650	A	C	PASS	missense_variant	MODERATE	CAST	101088981	transcript	XM_023258676.1	protein_coding	31	c.2370A>C	p.Lys790Asn
chrA1	160846650	A	C	PASS	missense_variant	MODERATE	CAST	101088981	transcript	XM_023258688.1	protein_coding	30	c.2304A>C	p.Lys768Asn
chrA1	160846650	A	C	PASS	missense_variant	MODERATE	CAST	101088981	transcript	XM_023258666.1	protein_coding	31	c.2373A>C	p.Lys791Asn
chrA1	160846650	A	C	PASS	missense_variant	MODERATE	CAST	101088981	transcript	XM_023258685.1	protein_coding	30	c.2307A>C	p.Lys769Asn
chrA1	160846650	A	C	PASS	missense_variant	MODERATE	CAST	101088981	transcript	XM_023258679.1	protein_coding	30	c.2310A>C	p.Lys770Asn
chrA1	160846650	A	C	PASS	missense_variant	MODERATE	CAST	101088981	transcript	XM_011284727.2	protein_coding	31	c.2331A>C	p.Lys777Asn
chrA1	160846650	A	C	PASS	missense_variant	MODERATE	CAST	101088981	transcript	XM_011284750.2	protein_coding	29	c.2127A>C	p.Lys709Asn
chrA1	160846650	A	C	PASS	missense_variant	MODERATE	CAST	101088981	transcript	XM_011284751.2	protein_coding	28	c.2061A>C	p.Lys687Asn
chrA1	190217439	C	A	PASS	missense_variant	MODERATE	SLU7	101084168	transcript	XM_023260055.1	protein_coding	15	c.1564C>A	p.His522Asn
chrA1	190217441	T	A	PASS	missense_variant	MODERATE	SLU7	101084168	transcript	XM_023260055.1	protein_coding	15	c.1566T>A	p.His522Gln
chrA1	190217442	G	A	PASS	missense_variant	MODERATE	SLU7	101084168	transcript	XM_023260055.1	protein_coding	15	c.1567G>A	p.Glu523Lys
chrA1	190217448	T	A	PASS	missense_variant	MODERATE	SLU7	101084168	transcript	XM_023260055.1	protein_coding	15	c.1573T>A	p.Leu525Met
chrA1	190217449	T	A	PASS	stop_gained	HIGH	SLU7	101084168	transcript	XM_023260055.1	protein_coding	15	c.1574T>A	p.Leu525*
chrA1	208814791	TGAAGACGTAAG	T	PASS	splice_donor_variant&conservative_inframe_deletion&splice_region_variant&intron_variant	HIGH	MROH2B	101094240	transcript	XM_019811443.2	protein_coding	38	c.4189_4194+5delGAAGACGTAAG	p.Glu1397_Asp1398del
chrA1	208814791	TGAAGACGTAAG	T	PASS	splice_donor_variant&conservative_inframe_deletion&splice_region_variant&intron_variant	HIGH	MROH2B	101094240	transcript	XM_023238843.1	protein_coding	37	c.4189_4194+5delGAAGACGTAAG	p.Glu1397_Asp1398del
chrA1	208814791	TGAAGACGTAAG	T	PASS	splice_donor_variant&conservative_inframe_deletion&splice_region_variant&intron_variant	HIGH	MROH2B	101094240	transcript	XM_019811451.2	protein_coding	37	c.4189_4194+5delGAAGACGTAAG	p.Glu1397_Asp1398del
chrA1	208814791	TGAAGACGTAAG	T	PASS	splice_donor_variant&conservative_inframe_deletion&splice_region_variant&intron_variant	HIGH	MROH2B	101094240	transcript	XM_023238844.1	protein_coding	33	c.3628_3633+5delGAAGACGTAAG	p.Glu1210_Asp1211del
chrA1	233694469	G	A	PASS	missense_variant	MODERATE	ANKRD33B	101092418	transcript	XM_011287289.3	protein_coding	4	c.1244C>T	p.Pro415Leu
chrA2	7791	C	A	PASS	missense_variant	MODERATE			transcript	TRANSCRIPT_	protein_coding	7	c.5431C>A	p.Leu1811Ile
chrA2	7792	T	A	PASS	missense_variant	MODERATE			transcript	TRANSCRIPT_	protein_coding	7	c.5432T>A	p.Leu1811Gln
chrA2	7795	G	A	PASS	missense_variant	MODERATE			transcript	TRANSCRIPT_	protein_coding	7	c.5435G>A	p.Arg1812Lys
chrA2	7797	G	A	PASS	missense_variant	MODERATE			transcript	TRANSCRIPT_	protein_coding	7	c.5437G>A	p.Gly1813Arg
chrA2	7798	G	A	PASS	missense_variant	MODERATE			transcript	TRANSCRIPT_	protein_coding	7	c.5438G>A	p.Gly1813Glu
chrA2	1168757	G	A	PASS	missense_variant	MODERATE	REXO1	105261118	transcript	XM_023243259.1	protein_coding	2	c.1807C>T	p.Pro603Ser
chrA2	1552656	C	G	PASS	missense_variant	MODERATE	LINGO3	105261113	transcript	XM_023243396.1	protein_coding	2	c.1748G>C	p.Gly583Ala
chrA2	1655061	GT	G	PASS	frameshift_variant&stop_lost	HIGH	TIMM13	105261067	transcript	XM_023243409.1	protein_coding	3	c.288delA	p.Ter96fs
chrA2	2459754	C	T	PASS	missense_variant	MODERATE	GNA11	101086541	transcript	XM_023243621.1	protein_coding	1	c.5C>T	p.Thr2Ile
chrA2	5344870	T	C	PASS	missense_variant	MODERATE	LOC101091924	101091924	transcript	XM_023244396.1	protein_coding	17	c.2023T>C	p.Trp675Arg
chrA2	8914712	A	T	QD2	stop_gained	HIGH	LOC101082633	101082633	transcript	XM_011289265.3	protein_coding	4	c.1626T>A	p.Cys542*
chrA2	8914712	A	T	QD2	stop_gained	HIGH	LOC101082633	101082633	transcript	XM_019817952.2	protein_coding	4	c.1623T>A	p.Cys541*
chrA2	8914712	A	T	QD2	stop_gained	HIGH	LOC101082633	101082633	transcript	XM_019817959.2	protein_coding	5	c.1584T>A	p.Cys528*
chrA2	8914712	A	T	QD2	stop_gained	HIGH	LOC101082633	101082633	transcript	XM_023245647.1	protein_coding	4	c.1584T>A	p.Cys528*
chrA2	8914713	C	T	QD2	missense_variant	MODERATE	LOC101082633	101082633	transcript	XM_011289265.3	protein_coding	4	c.1625G>A	p.Cys542Tyr
chrA2	8914713	C	T	QD2	missense_variant	MODERATE	LOC101082633	101082633	transcript	XM_019817952.2	protein_coding	4	c.1622G>A	p.Cys541Tyr
chrA2	8914713	C	T	QD2	missense_variant	MODERATE	LOC101082633	101082633	transcript	XM_019817959.2	protein_coding	5	c.1583G>A	p.Cys528Tyr
chrA2	8914713	C	T	QD2	missense_variant	MODERATE	LOC101082633	101082633	transcript	XM_023245647.1	protein_coding	4	c.1583G>A	p.Cys528Tyr
chrA2	8914714	A	T	QD2	missense_variant	MODERATE	LOC101082633	101082633	transcript	XM_011289265.3	protein_coding	4	c.1624T>A	p.Cys542Ser
chrA2	8914714	A	T	QD2	missense_variant	MODERATE	LOC101082633	101082633	transcript	XM_019817952.2	protein_coding	4	c.1621T>A	p.Cys541Ser
chrA2	8914714	A	T	QD2	missense_variant	MODERATE	LOC101082633	101082633	transcript	XM_019817959.2	protein_coding	5	c.1582T>A	p.Cys528Ser
chrA2	8914714	A	T	QD2	missense_variant	MODERATE	LOC101082633	101082633	transcript	XM_023245647.1	protein_coding	4	c.1582T>A	p.Cys528Ser
chrA2	8914721	A	T	QD2	stop_gained	HIGH	LOC101082633	101082633	transcript	XM_011289265.3	protein_coding	4	c.1617T>A	p.Cys539*
chrA2	8914721	A	T	QD2	stop_gained	HIGH	LOC101082633	101082633	transcript	XM_019817952.2	protein_coding	4	c.1614T>A	p.Cys538*
chrA2	8914721	A	T	QD2	stop_gained	HIGH	LOC101082633	101082633	transcript	XM_019817959.2	protein_coding	5	c.1575T>A	p.Cys525*
chrA2	8914721	A	T	QD2	stop_gained	HIGH	LOC101082633	101082633	transcript	XM_023245647.1	protein_coding	4	c.1575T>A	p.Cys525*
chrA2	10906317	A	G	PASS	missense_variant	MODERATE	LOC101082634	101082634	transcript	XM_011290174.1	protein_coding	1	c.887A>G	p.Asp296Gly
chrA2	10906335	G	T	PASS	missense_variant	MODERATE	LOC101082634	101082634	transcript	XM_011290174.1	protein_coding	1	c.905G>T	p.Arg302Met
chrA2	11078135	G	A	PASS	missense_variant	MODERATE	LOC101093132	101093132	transcript	XM_011290123.2	protein_coding	1	c.365G>A	p.Arg122Gln
chrA2	11121431	A	C	PASS	missense_variant	MODERATE	LOC101086209	101086209	transcript	XM_011290109.2	protein_coding	1	c.79A>C	p.Lys27Gln
chrA2	11183287	A	G	PASS	missense_variant	MODERATE	LOC101086955	101086955	transcript	XM_003981996.1	protein_coding	1	c.757T>C	p.Cys253Arg
chrA2	11321786	G	T	PASS	missense_variant	MODERATE	LOC101099278	101099278	transcript	XM_011290088.3	protein_coding	7	c.808G>T	p.Ala270Ser
chrA2	11336288	G	T	PASS	missense_variant	MODERATE	SYDE1	101087974	transcript	XM_023241193.1	protein_coding	8	c.1694G>T	p.Gly565Val
chrA2	11687458	G	A	PASS	missense_variant	MODERATE	LOC105259722	105259722	transcript	XM_023241195.1	protein_coding	4	c.163G>A	p.Ala55Thr
chrA2	11791648	G	A	PASS	missense_variant	MODERATE	LOC105261287	105261287	transcript	XM_023241386.1	protein_coding	1	c.494C>T	p.Thr165Met
chrA2	12412494	C	G	PASS	missense_variant&splice_region_variant	MODERATE	NWD1	101095083	transcript	XM_019819120.2	protein_coding	8	c.2109C>G	p.His703Gln
chrA2	15685853	C	T	PASS	missense_variant	MODERATE	FYCO1	101093003	transcript	XM_023248072.1	protein_coding	8	c.850G>A	p.Ala284Thr
chrA2	15685853	C	T	PASS	missense_variant	MODERATE	FYCO1	101093003	transcript	XM_023248080.1	protein_coding	8	c.850G>A	p.Ala284Thr
chrA2	15803990	C	T	PASS	missense_variant	MODERATE	CCR1	100191004	transcript	NM_001135969.1	protein_coding	1	c.742G>A	p.Val248Ile
chrA2	15803990	C	T	PASS	missense_variant	MODERATE	CCR1	100191004	transcript	XM_019814628.2	protein_coding	2	c.742G>A	p.Val248Ile
chrA2	15803990	C	T	PASS	missense_variant	MODERATE	CCR1	100191004	transcript	XM_019814626.2	protein_coding	2	c.742G>A	p.Val248Ile
chrA2	15803990	C	T	PASS	missense_variant	MODERATE	CCR1	100191004	transcript	XM_006928640.4	protein_coding	2	c.742G>A	p.Val248Ile
chrA2	15961896	C	G	PASS	missense_variant	MODERATE	CCRL2	101093252	transcript	XM_003982179.4	protein_coding	2	c.417C>G	p.Cys139Trp
chrA2	15961896	C	G	PASS	missense_variant	MODERATE	CCRL2	101093252	transcript	XM_006928678.4	protein_coding	2	c.417C>G	p.Cys139Trp
chrA2	16092965	G	A	PASS	missense_variant	MODERATE	TDGF1	101093999	transcript	XM_019826095.2	protein_coding	3	c.161G>A	p.Arg54His
chrA2	16329456	G	C	PASS	missense_variant	MODERATE	PTH1R	101095960	transcript	XM_023248158.1	protein_coding	9	c.830G>C	p.Gly277Ala
chrA2	18670143	G	A	PASS	missense_variant	MODERATE	BSN	101085610	transcript	XM_003982229.5	protein_coding	5	c.2924G>A	p.Arg975His
chrA2	18671934	C	T	PASS	missense_variant	MODERATE	BSN	101085610	transcript	XM_003982229.5	protein_coding	5	c.4715C>T	p.Ser1572Phe
chrA2	18671936	A	C	PASS	missense_variant	MODERATE	BSN	101085610	transcript	XM_003982229.5	protein_coding	5	c.4717A>C	p.Thr1573Pro
chrA2	18678954	G	A	PASS	missense_variant	MODERATE	BSN	101085610	transcript	XM_003982229.5	protein_coding	6	c.9451G>A	p.Asp3151Asn
chrA2	18679851	A	T	PASS	missense_variant	MODERATE	BSN	101085610	transcript	XM_003982229.5	protein_coding	6	c.10348A>T	p.Ser3450Cys
chrA2	25174487	A	G	PASS	missense_variant	MODERATE	SPATA12	102901846	transcript	XM_019825021.1	protein_coding	2	c.268A>G	p.Ile90Val
chrA2	26427114	C	T	PASS	missense_variant	MODERATE	ACOX2	101101039	transcript	XM_003982378.3	protein_coding	2	c.127G>A	p.Gly43Arg
chrA2	26427114	C	T	PASS	missense_variant	MODERATE	ACOX2	101101039	transcript	XM_019823488.1	protein_coding	2	c.127G>A	p.Gly43Arg
chrA2	26427114	C	T	PASS	missense_variant	MODERATE	ACOX2	101101039	transcript	XM_019823487.2	protein_coding	3	c.127G>A	p.Gly43Arg
chrA2	53378876	C	A	PASS	stop_gained	HIGH	PPARG	101095161	transcript	XM_003982496.5	protein_coding	3	c.477C>A	p.Cys159*
chrA2	53378876	C	A	PASS	stop_gained	HIGH	PPARG	101095161	transcript	XM_006928991.3	protein_coding	4	c.387C>A	p.Cys129*
chrA2	53378876	C	A	PASS	stop_gained	HIGH	PPARG	101095161	transcript	XM_011280216.2	protein_coding	4	c.387C>A	p.Cys129*
chrA2	53378876	C	A	PASS	stop_gained	HIGH	PPARG	101095161	transcript	XM_011280215.3	protein_coding	4	c.387C>A	p.Cys129*
chrA2	53378876	C	A	PASS	stop_gained	HIGH	PPARG	101095161	transcript	XM_019825091.2	protein_coding	4	c.387C>A	p.Cys129*
chrA2	53378880	G	A	PASS	splice_donor_variant&intron_variant	HIGH	PPARG	101095161	transcript	XM_003982496.5	protein_coding	3	c.480+1G>A
chrA2	53378880	G	A	PASS	splice_donor_variant&intron_variant	HIGH	PPARG	101095161	transcript	XM_006928991.3	protein_coding	4	c.390+1G>A
chrA2	53378880	G	A	PASS	splice_donor_variant&intron_variant	HIGH	PPARG	101095161	transcript	XM_011280216.2	protein_coding	4	c.390+1G>A
chrA2	53378880	G	A	PASS	splice_donor_variant&intron_variant	HIGH	PPARG	101095161	transcript	XM_011280215.3	protein_coding	4	c.390+1G>A
chrA2	53378880	G	A	PASS	splice_donor_variant&intron_variant	HIGH	PPARG	101095161	transcript	XM_019825091.2	protein_coding	4	c.390+1G>A
chrA2	59466702	G	C	PASS	missense_variant	MODERATE	CHST13	101093089	transcript	XM_023250093.1	protein_coding	3	c.877C>G	p.Arg293Gly
chrA2	59466702	G	C	PASS	missense_variant	MODERATE	CHST13	101093089	transcript	XM_019825163.2	protein_coding	3	c.721C>G	p.Arg241Gly
chrA2	64296771	G	C	PASS	missense_variant	MODERATE	PKD1L1	101081206	transcript	XM_023250145.1	protein_coding	54	c.8002C>G	p.Leu2668Val
chrA2	64384102	C	T	PASS	missense_variant	MODERATE	PKD1L1	101081206	transcript	XM_023250145.1	protein_coding	7	c.862G>A	p.Val288Ile
chrA2	64566018	C	A	PASS	missense_variant	MODERATE	ABCA13	101082477	transcript	XM_023241981.1	protein_coding	2	c.159C>A	p.Asp53Glu
chrA2	75064380	G	T	PASS	missense_variant	MODERATE			transcript	TRANSCRIPT_	protein_coding	125	c.38571G>T	p.Trp12857Cys
chrA2	76891200	G	A	PASS	missense_variant	MODERATE	VPS41	101099788	transcript	XM_006929098.3	protein_coding	11	c.865G>A	p.Glu289Lys
chrA2	76891200	G	A	PASS	missense_variant	MODERATE	VPS41	101099788	transcript	XM_006929099.4	protein_coding	5	c.391G>A	p.Glu131Lys
chrA2	76891201	AGGTTTCCG	A	PASS	frameshift_variant	HIGH	VPS41	101099788	transcript	XM_006929098.3	protein_coding	11	c.867_874delGGTTTCCG	p.Val290fs
chrA2	76891201	AGGTTTCCG	A	PASS	frameshift_variant	HIGH	VPS41	101099788	transcript	XM_006929099.4	protein_coding	5	c.393_400delGGTTTCCG	p.Val132fs
chrA2	78473128	G	T	PASS	missense_variant	MODERATE	LAMB4	101101552	transcript	XM_023250242.1	protein_coding	23	c.3061G>T	p.Asp1021Tyr
chrA2	78473128	G	T	PASS	missense_variant	MODERATE	LAMB4	101101552	transcript	XM_023250245.1	protein_coding	23	c.3061G>T	p.Asp1021Tyr
chrA2	78473128	G	T	PASS	missense_variant	MODERATE	LAMB4	101101552	transcript	XM_023250244.1	protein_coding	23	c.3061G>T	p.Asp1021Tyr
chrA2	78473128	G	T	PASS	missense_variant	MODERATE	LAMB4	101101552	transcript	XM_023250243.1	protein_coding	24	c.3061G>T	p.Asp1021Tyr
chrA2	78488766	G	A	PASS	missense_variant	MODERATE	LAMB4	101101552	transcript	XM_023250242.1	protein_coding	27	c.3949G>A	p.Glu1317Lys
chrA2	78488766	G	A	PASS	missense_variant	MODERATE	LAMB4	101101552	transcript	XM_023250245.1	protein_coding	27	c.3949G>A	p.Glu1317Lys
chrA2	78488766	G	A	PASS	missense_variant	MODERATE	LAMB4	101101552	transcript	XM_023250244.1	protein_coding	27	c.3949G>A	p.Glu1317Lys
chrA2	78488766	G	A	PASS	missense_variant	MODERATE	LAMB4	101101552	transcript	XM_023250243.1	protein_coding	28	c.3949G>A	p.Glu1317Lys
chrA2	80350298	A	T	PASS	splice_acceptor_variant&intron_variant	HIGH	SYPL1	101081616	transcript	XM_023250260.1	protein_coding	3	c.246-2A>T
chrA2	80350299	G	T	PASS	splice_acceptor_variant&intron_variant	HIGH	SYPL1	101081616	transcript	XM_023250260.1	protein_coding	3	c.246-1G>T
chrA2	80350300	G	T	PASS	missense_variant&splice_region_variant	MODERATE	SYPL1	101081616	transcript	XM_023250260.1	protein_coding	4	c.246G>T	p.Arg82Ser
chrA2	82569701	G	T	PASS	splice_acceptor_variant&intron_variant	HIGH	RELN	101085703	transcript	XM_019825367.2	protein_coding	4	c.545-1G>T
chrA2	82569701	G	T	PASS	splice_acceptor_variant&intron_variant	HIGH	RELN	101085703	transcript	XM_011280339.3	protein_coding	4	c.545-1G>T
chrA2	82569701	G	T	PASS	splice_acceptor_variant&intron_variant	HIGH	RELN	101085703	transcript	XM_019825368.2	protein_coding	4	c.545-1G>T
chrA2	97615499	GTTCAGCTTT	G	PASS	disruptive_inframe_deletion	MODERATE	PEX1	101086296	transcript	XM_023250341.1	protein_coding	9	c.1569_1577delAAAGCTGAA	p.Leu523_Asn526delinsPhe
chrA2	97615499	GTTCAGCTTT	G	PASS	disruptive_inframe_deletion	MODERATE	PEX1	101086296	transcript	XM_023250342.1	protein_coding	9	c.1569_1577delAAAGCTGAA	p.Leu523_Asn526delinsPhe
chrA2	97615499	GTTCAGCTTT	G	PASS	disruptive_inframe_deletion	MODERATE	PEX1	101086296	transcript	XM_023250343.1	protein_coding	9	c.1569_1577delAAAGCTGAA	p.Leu523_Asn526delinsPhe
chrA2	98204217	ATCTGTT	A	QD2	splice_acceptor_variant&splice_region_variant&5_prime_UTR_variant&intron_variant	HIGH	SAMD9L	101084783	transcript	XM_003982747.4	protein_coding	2	c.-323-5_-323delAACAGA
chrA2	103472643	G	A	PASS	missense_variant	MODERATE	ICA1	101097468	transcript	XM_023250380.1	protein_coding	9	c.1064C>T	p.Thr355Met
chrA2	103472643	G	A	PASS	missense_variant	MODERATE	ICA1	101097468	transcript	XM_023250384.1	protein_coding	9	c.884C>T	p.Thr295Met
chrA2	103472643	G	A	PASS	missense_variant	MODERATE	ICA1	101097468	transcript	XM_023250387.1	protein_coding	9	c.884C>T	p.Thr295Met
chrA2	103472643	G	A	PASS	missense_variant	MODERATE	ICA1	101097468	transcript	XM_023250389.1	protein_coding	9	c.881C>T	p.Thr294Met
chrA2	103472643	G	A	PASS	missense_variant	MODERATE	ICA1	101097468	transcript	XM_023250391.1	protein_coding	9	c.881C>T	p.Thr294Met
chrA2	103472643	G	A	PASS	missense_variant	MODERATE	ICA1	101097468	transcript	XM_023250385.1	protein_coding	9	c.884C>T	p.Thr295Met
chrA2	103472643	G	A	PASS	missense_variant	MODERATE	ICA1	101097468	transcript	XM_023250386.1	protein_coding	10	c.884C>T	p.Thr295Met
chrA2	103472643	G	A	PASS	missense_variant	MODERATE	ICA1	101097468	transcript	XM_023250388.1	protein_coding	9	c.884C>T	p.Thr295Met
chrA2	103472643	G	A	PASS	missense_variant	MODERATE	ICA1	101097468	transcript	XM_023250390.1	protein_coding	9	c.881C>T	p.Thr294Met
chrA2	103472643	G	A	PASS	missense_variant	MODERATE	ICA1	101097468	transcript	XM_023250381.1	protein_coding	9	c.1061C>T	p.Thr354Met
chrA2	103472643	G	A	PASS	missense_variant	MODERATE	ICA1	101097468	transcript	XM_023250382.1	protein_coding	9	c.1064C>T	p.Thr355Met
chrA2	103472643	G	A	PASS	missense_variant	MODERATE	ICA1	101097468	transcript	XM_023250393.1	protein_coding	9	c.1064C>T	p.Thr355Met
chrA2	103472643	G	A	PASS	missense_variant	MODERATE	ICA1	101097468	transcript	XM_023250396.1	protein_coding	9	c.1061C>T	p.Thr354Met
chrA2	103472643	G	A	PASS	missense_variant	MODERATE	ICA1	101097468	transcript	XM_023250392.1	protein_coding	9	c.1064C>T	p.Thr355Met
chrA2	103472643	G	A	PASS	missense_variant	MODERATE	ICA1	101097468	transcript	XM_023250383.1	protein_coding	9	c.1064C>T	p.Thr355Met
chrA2	103472643	G	A	PASS	missense_variant	MODERATE	ICA1	101097468	transcript	XM_023250395.1	protein_coding	9	c.1064C>T	p.Thr355Met
chrA2	103472643	G	A	PASS	missense_variant	MODERATE	ICA1	101097468	transcript	XM_023250394.1	protein_coding	9	c.1064C>T	p.Thr355Met
chrA2	103573474	T	C	PASS	splice_acceptor_variant&intron_variant	HIGH	ICA1	101097468	transcript	XM_023250387.1	protein_coding	1	c.-24-2A>G
chrA2	103573474	T	C	PASS	splice_acceptor_variant&intron_variant	HIGH	ICA1	101097468	transcript	XM_023250391.1	protein_coding	1	c.-24-2A>G
chrA2	103573474	T	C	PASS	splice_acceptor_variant&intron_variant	HIGH	ICA1	101097468	transcript	XM_023250388.1	protein_coding	1	c.-24-2A>G
chrA2	103573474	T	C	PASS	splice_acceptor_variant&intron_variant	HIGH	ICA1	101097468	transcript	XM_023250390.1	protein_coding	1	c.-24-2A>G
chrA2	106290090	C	A	PASS	missense_variant	MODERATE	THSD7A	101100458	transcript	XM_019825528.2	protein_coding	22	c.4245G>T	p.Gln1415His
chrA2	106290090	C	A	PASS	missense_variant	MODERATE	THSD7A	101100458	transcript	XM_019825529.2	protein_coding	21	c.4176G>T	p.Gln1392His
chrA2	106290090	C	A	PASS	missense_variant	MODERATE	THSD7A	101100458	transcript	XM_019825530.2	protein_coding	22	c.4245G>T	p.Gln1415His
chrA2	110754432	TTA	T	PASS	frameshift_variant	HIGH	ISPD	101092257	transcript	XM_023250417.1	protein_coding	9	c.1125_1126delTA	p.Tyr375fs
chrA2	110754432	TTA	T	PASS	frameshift_variant	HIGH	ISPD	101092257	transcript	XM_023250415.1	protein_coding	9	c.1125_1126delTA	p.Tyr375fs
chrA2	110754432	TTA	T	PASS	frameshift_variant	HIGH	ISPD	101092257	transcript	XM_023250416.1	protein_coding	9	c.1125_1126delTA	p.Tyr375fs
chrA2	125426246	ACT	A	PASS	splice_acceptor_variant&intron_variant	HIGH	KBTBD2	101090757	transcript	XM_023250478.1	protein_coding	1	c.-341-2_-341-1delAG
chrA2	126129596	A	G	PASS	missense_variant	MODERATE	BBS9	101091858	transcript	XM_019825674.2	protein_coding	21	c.2401A>G	p.Ile801Val
chrA2	126129596	A	G	PASS	missense_variant	MODERATE	BBS9	101091858	transcript	XM_006929295.4	protein_coding	20	c.2386A>G	p.Ile796Val
chrA2	126129596	A	G	PASS	missense_variant	MODERATE	BBS9	101091858	transcript	XM_023250491.1	protein_coding	21	c.2401A>G	p.Ile801Val
chrA2	126129596	A	G	PASS	missense_variant	MODERATE	BBS9	101091858	transcript	XM_006929296.4	protein_coding	20	c.2386A>G	p.Ile796Val
chrA2	126129596	A	G	PASS	missense_variant	MODERATE	BBS9	101091858	transcript	XM_019825676.2	protein_coding	19	c.2128A>G	p.Ile710Val
chrA2	126129596	A	G	PASS	missense_variant	MODERATE	BBS9	101091858	transcript	XM_019825677.2	protein_coding	18	c.2026A>G	p.Ile676Val
chrA2	126129596	A	G	PASS	missense_variant	MODERATE	BBS9	101091858	transcript	XM_023250492.1	protein_coding	17	c.1933A>G	p.Ile645Val
chrA2	142783094	TACAA	T	PASS	frameshift_variant	HIGH	HYAL4	101095484	transcript	XM_006929334.3	protein_coding	2	c.635_638delACAA	p.Tyr212fs
chrA2	142783100	T	TTTTTTTA	PASS	frameshift_variant&stop_gained	HIGH	HYAL4	101095484	transcript	XM_006929334.3	protein_coding	2	c.640_641insTTTTTTA	p.Tyr214fs
chrA2	142783103	GATT	G	PASS	conservative_inframe_deletion	MODERATE	HYAL4	101095484	transcript	XM_006929334.3	protein_coding	2	c.646_648delTAT	p.Tyr216del
chrA2	146924521	G	A	PASS	missense_variant	MODERATE	LOC111559540	111559540	transcript	XM_023250548.1	protein_coding	7	c.785C>T	p.Ala262Val
chrA2	148049174	T	C	PASS	missense_variant	MODERATE	SSMEM1	101093172	transcript	XM_006929372.2	protein_coding	1	c.14T>C	p.Leu5Pro
chrA2	148366148	T	A	PASS	splice_acceptor_variant&intron_variant	HIGH	COPG2	101090929	transcript	XM_023250572.1	protein_coding	12	c.1129-2A>T
chrA2	148366148	T	A	PASS	splice_acceptor_variant&intron_variant	HIGH	COPG2	101090929	transcript	XM_019825808.1	protein_coding	9	c.871-2A>T
chrA2	149377831	C	T	PASS	missense_variant	MODERATE			transcript	TRANSCRIPT_	protein_coding	182	c.50543C>T	p.Pro16848Leu
chrA2	149456434	TC	T	PASS	frameshift_variant	HIGH			transcript	TRANSCRIPT_	protein_coding	200	c.53899delC	p.Leu17967fs
chrA2	158010184	GTGGTCA	G	PASS	disruptive_inframe_deletion	MODERATE	LOC101084183	101084183	transcript	XM_003983117.3	protein_coding	1	c.432_437delGGTCAT	p.Val145_Ile146del
chrA2	158303764	C	T	PASS	missense_variant	MODERATE	LOC102902015	102902015	transcript	XM_006929434.3	protein_coding	3	c.209G>A	p.Arg70Gln
chrA2	158333728	A	G	PASS	missense_variant	MODERATE			transcript	TRANSCRIPT_	protein_coding	206	c.55135A>G	p.Lys18379Glu
chrA2	158345072	G	A	PASS	missense_variant	MODERATE			transcript	TRANSCRIPT_	protein_coding	208	c.55429G>A	p.Val18477Met
chrA2	158345259	G	A	PASS	missense_variant	MODERATE			transcript	TRANSCRIPT_	protein_coding	208	c.55616G>A	p.Ser18539Asn
chrA2	158602463	G	A	PASS	missense_variant	MODERATE	EPHB6	101085965	transcript	XM_003983124.5	protein_coding	6	c.748G>A	p.Val250Met
chrA2	158602463	G	A	PASS	missense_variant	MODERATE	EPHB6	101085965	transcript	XM_023250651.1	protein_coding	5	c.748G>A	p.Val250Met
chrA2	158602463	G	A	PASS	missense_variant	MODERATE	EPHB6	101085965	transcript	XM_023250650.1	protein_coding	5	c.748G>A	p.Val250Met
chrA2	158602463	G	A	PASS	missense_variant	MODERATE	EPHB6	101085965	transcript	XM_023250648.1	protein_coding	5	c.748G>A	p.Val250Met
chrA2	158602463	G	A	PASS	missense_variant	MODERATE	EPHB6	101085965	transcript	XM_023250649.1	protein_coding	6	c.748G>A	p.Val250Met
chrA2	163187040	CG	C	PASS	frameshift_variant	HIGH	CNTNAP2	101086795	transcript	XM_023250688.1	protein_coding	22	c.3521delG	p.Gly1174fs
chrA2	165112621	A	AGCAGGGCCCAGCCTCCCCGACAGCAGAGCCCGGCAGGGCACCGGCACCCGCAGTCTT	PASS	conservative_inframe_insertion	MODERATE	NOS3	101096463	transcript	XM_003983218.5	protein_coding	1	c.135_136insGTCTTGCAGGGCCCAGCCTCCCCGACAGCAGAGCCCGGCAGGGCACCGGCACCCGCA	p.Ala45_Pro46insValLeuGlnGlyProAlaSerProThrAlaGluProGlyArgAlaProAlaProAla
chrA2	165112621	A	AGCAGGGCCCAGCCTCCCCGACAGCAGAGCCCGGCAGGGCACCGGCACCCGCAGTCTT	PASS	conservative_inframe_insertion	MODERATE	NOS3	101096463	transcript	XM_006929504.4	protein_coding	1	c.135_136insGTCTTGCAGGGCCCAGCCTCCCCGACAGCAGAGCCCGGCAGGGCACCGGCACCCGCA	p.Ala45_Pro46insValLeuGlnGlyProAlaSerProThrAlaGluProGlyArgAlaProAlaProAla
chrA2	165300237	G	A	PASS	missense_variant&splice_region_variant	MODERATE	IQCA1L	102899223	transcript	XM_011280634.3	protein_coding	4	c.460C>T	p.Arg154Cys
chrA2	165300237	G	A	PASS	missense_variant&splice_region_variant	MODERATE	IQCA1L	102899223	transcript	XM_019826028.2	protein_coding	3	c.49C>T	p.Arg17Cys
chrA2	168232771	AG	A	PASS	frameshift_variant	HIGH	PAXIP1	101087392	transcript	XM_023242347.1	protein_coding	16	c.2369delC	p.Pro790fs
chrA2	170913162	G	A	QD2	missense_variant	MODERATE	NCAPG2	101085874	transcript	XM_019826078.2	protein_coding	14	c.1333C>T	p.Pro445Ser
chrA2	170913162	G	A	QD2	missense_variant	MODERATE	NCAPG2	101085874	transcript	XM_023250829.1	protein_coding	13	c.1333C>T	p.Pro445Ser
chrA2	170913162	G	A	QD2	missense_variant	MODERATE	NCAPG2	101085874	transcript	XM_023250826.1	protein_coding	14	c.1333C>T	p.Pro445Ser
chrA2	170913162	G	A	QD2	missense_variant	MODERATE	NCAPG2	101085874	transcript	XM_023250831.1	protein_coding	12	c.1120C>T	p.Pro374Ser
chrA2	170913162	G	A	QD2	missense_variant	MODERATE	NCAPG2	101085874	transcript	XM_023250824.1	protein_coding	15	c.1333C>T	p.Pro445Ser
chrA2	170913162	G	A	QD2	missense_variant	MODERATE	NCAPG2	101085874	transcript	XM_023250825.1	protein_coding	15	c.1333C>T	p.Pro445Ser
chrA2	170913162	G	A	QD2	missense_variant	MODERATE	NCAPG2	101085874	transcript	XM_023250827.1	protein_coding	15	c.1333C>T	p.Pro445Ser
chrA2	170913162	G	A	QD2	missense_variant	MODERATE	NCAPG2	101085874	transcript	XM_023250828.1	protein_coding	14	c.1333C>T	p.Pro445Ser
chrA2	170913162	G	A	QD2	missense_variant	MODERATE	NCAPG2	101085874	transcript	XM_023250830.1	protein_coding	15	c.1333C>T	p.Pro445Ser
chrA2	170913162	G	A	QD2	missense_variant	MODERATE	NCAPG2	101085874	transcript	XM_023250832.1	protein_coding	15	c.1333C>T	p.Pro445Ser
chrA2	170913167	C	A	QD2	missense_variant&splice_region_variant	MODERATE	NCAPG2	101085874	transcript	XM_019826078.2	protein_coding	14	c.1328G>T	p.Cys443Phe
chrA2	170913167	C	A	QD2	missense_variant&splice_region_variant	MODERATE	NCAPG2	101085874	transcript	XM_023250829.1	protein_coding	13	c.1328G>T	p.Cys443Phe
chrA2	170913167	C	A	QD2	missense_variant&splice_region_variant	MODERATE	NCAPG2	101085874	transcript	XM_023250826.1	protein_coding	14	c.1328G>T	p.Cys443Phe
chrA2	170913167	C	A	QD2	missense_variant&splice_region_variant	MODERATE	NCAPG2	101085874	transcript	XM_023250831.1	protein_coding	12	c.1115G>T	p.Cys372Phe
chrA2	170913167	C	A	QD2	missense_variant&splice_region_variant	MODERATE	NCAPG2	101085874	transcript	XM_023250824.1	protein_coding	15	c.1328G>T	p.Cys443Phe
chrA2	170913167	C	A	QD2	missense_variant&splice_region_variant	MODERATE	NCAPG2	101085874	transcript	XM_023250825.1	protein_coding	15	c.1328G>T	p.Cys443Phe
chrA2	170913167	C	A	QD2	missense_variant&splice_region_variant	MODERATE	NCAPG2	101085874	transcript	XM_023250827.1	protein_coding	15	c.1328G>T	p.Cys443Phe
chrA2	170913167	C	A	QD2	missense_variant&splice_region_variant	MODERATE	NCAPG2	101085874	transcript	XM_023250828.1	protein_coding	14	c.1328G>T	p.Cys443Phe
chrA2	170913167	C	A	QD2	missense_variant&splice_region_variant	MODERATE	NCAPG2	101085874	transcript	XM_023250830.1	protein_coding	15	c.1328G>T	p.Cys443Phe
chrA2	170913167	C	A	QD2	missense_variant&splice_region_variant	MODERATE	NCAPG2	101085874	transcript	XM_023250832.1	protein_coding	15	c.1328G>T	p.Cys443Phe
chrA2	170913169	C	A	QD2	splice_acceptor_variant&intron_variant	HIGH	NCAPG2	101085874	transcript	XM_019826078.2	protein_coding	13	c.1327-1G>T
chrA2	170913169	C	A	QD2	splice_acceptor_variant&intron_variant	HIGH	NCAPG2	101085874	transcript	XM_023250829.1	protein_coding	12	c.1327-1G>T
chrA2	170913169	C	A	QD2	splice_acceptor_variant&intron_variant	HIGH	NCAPG2	101085874	transcript	XM_023250826.1	protein_coding	13	c.1327-1G>T
chrA2	170913169	C	A	QD2	splice_acceptor_variant&intron_variant	HIGH	NCAPG2	101085874	transcript	XM_023250831.1	protein_coding	11	c.1114-1G>T
chrA2	170913169	C	A	QD2	splice_acceptor_variant&intron_variant	HIGH	NCAPG2	101085874	transcript	XM_023250824.1	protein_coding	14	c.1327-1G>T
chrA2	170913169	C	A	QD2	splice_acceptor_variant&intron_variant	HIGH	NCAPG2	101085874	transcript	XM_023250825.1	protein_coding	14	c.1327-1G>T
chrA2	170913169	C	A	QD2	splice_acceptor_variant&intron_variant	HIGH	NCAPG2	101085874	transcript	XM_023250827.1	protein_coding	14	c.1327-1G>T
chrA2	170913169	C	A	QD2	splice_acceptor_variant&intron_variant	HIGH	NCAPG2	101085874	transcript	XM_023250828.1	protein_coding	13	c.1327-1G>T
chrA2	170913169	C	A	QD2	splice_acceptor_variant&intron_variant	HIGH	NCAPG2	101085874	transcript	XM_023250830.1	protein_coding	14	c.1327-1G>T
chrA2	170913169	C	A	QD2	splice_acceptor_variant&intron_variant	HIGH	NCAPG2	101085874	transcript	XM_023250832.1	protein_coding	14	c.1327-1G>T
chrA2	170913170	T	A	QD2	splice_acceptor_variant&intron_variant	HIGH	NCAPG2	101085874	transcript	XM_019826078.2	protein_coding	13	c.1327-2A>T
chrA2	170913170	T	A	QD2	splice_acceptor_variant&intron_variant	HIGH	NCAPG2	101085874	transcript	XM_023250829.1	protein_coding	12	c.1327-2A>T
chrA2	170913170	T	A	QD2	splice_acceptor_variant&intron_variant	HIGH	NCAPG2	101085874	transcript	XM_023250826.1	protein_coding	13	c.1327-2A>T
chrA2	170913170	T	A	QD2	splice_acceptor_variant&intron_variant	HIGH	NCAPG2	101085874	transcript	XM_023250831.1	protein_coding	11	c.1114-2A>T
chrA2	170913170	T	A	QD2	splice_acceptor_variant&intron_variant	HIGH	NCAPG2	101085874	transcript	XM_023250824.1	protein_coding	14	c.1327-2A>T
chrA2	170913170	T	A	QD2	splice_acceptor_variant&intron_variant	HIGH	NCAPG2	101085874	transcript	XM_023250825.1	protein_coding	14	c.1327-2A>T
chrA2	170913170	T	A	QD2	splice_acceptor_variant&intron_variant	HIGH	NCAPG2	101085874	transcript	XM_023250827.1	protein_coding	14	c.1327-2A>T
chrA2	170913170	T	A	QD2	splice_acceptor_variant&intron_variant	HIGH	NCAPG2	101085874	transcript	XM_023250828.1	protein_coding	13	c.1327-2A>T
chrA2	170913170	T	A	QD2	splice_acceptor_variant&intron_variant	HIGH	NCAPG2	101085874	transcript	XM_023250830.1	protein_coding	14	c.1327-2A>T
chrA2	170913170	T	A	QD2	splice_acceptor_variant&intron_variant	HIGH	NCAPG2	101085874	transcript	XM_023250832.1	protein_coding	14	c.1327-2A>T
chrA3	4678629	CTCGGTCTCGAAG	C	PASS	disruptive_inframe_deletion	MODERATE	LOC102900772	102900772	transcript	XM_006929601.3	protein_coding	1	c.372_383delCTTCGAGACCGA	p.Asp124_Thr127del
chrA3	4679011	A	T	PASS	start_lost	HIGH	LOC102900772	102900772	transcript	XM_006929601.3	protein_coding	1	c.2T>A	p.Met1?
chrA3	13799448	C	T	PASS	missense_variant	MODERATE	SULF2	101083072	transcript	XM_023251149.1	protein_coding	11	c.1448C>T	p.Pro483Leu
chrA3	13799448	C	T	PASS	missense_variant	MODERATE	SULF2	101083072	transcript	XM_023251150.1	protein_coding	11	c.1448C>T	p.Pro483Leu
chrA3	15190579	C	T	PASS	missense_variant	MODERATE	NCOA5	101083924	transcript	XM_023251173.1	protein_coding	4	c.427C>T	p.Pro143Ser
chrA3	15190579	C	T	PASS	missense_variant	MODERATE	NCOA5	101083924	transcript	XM_023251175.1	protein_coding	4	c.427C>T	p.Pro143Ser
chrA3	15190579	C	T	PASS	missense_variant	MODERATE	NCOA5	101083924	transcript	XM_023251174.1	protein_coding	3	c.196C>T	p.Pro66Ser
chrA3	23889029	C	T	PASS	missense_variant	MODERATE	SPAG4	101080446	transcript	XM_019826596.2	protein_coding	2	c.328G>A	p.Val110Ile
chrA3	23889029	C	T	PASS	missense_variant	MODERATE	SPAG4	101080446	transcript	XM_023251290.1	protein_coding	1	c.133G>A	p.Val45Ile
chrA3	23889029	C	T	PASS	missense_variant	MODERATE	SPAG4	101080446	transcript	XM_023251291.1	protein_coding	2	c.91G>A	p.Val31Ile
chrA3	23889029	C	T	PASS	missense_variant	MODERATE	SPAG4	101080446	transcript	XM_023251292.1	protein_coding	2	c.91G>A	p.Val31Ile
chrA3	23889029	C	T	PASS	missense_variant	MODERATE	SPAG4	101080446	transcript	XM_003983574.5	protein_coding	2	c.328G>A	p.Val110Ile
chrA3	23889029	C	T	PASS	missense_variant	MODERATE	SPAG4	101080446	transcript	XM_019826600.2	protein_coding	2	c.328G>A	p.Val110Ile
chrA3	25875575	G	T	PASS	missense_variant	MODERATE	CDK5RAP1	101091009	transcript	XM_011280848.3	protein_coding	4	c.400G>T	p.Asp134Tyr
chrA3	25875575	G	T	PASS	missense_variant	MODERATE	CDK5RAP1	101091009	transcript	XM_023251324.1	protein_coding	4	c.400G>T	p.Asp134Tyr
chrA3	34928464	C	T	PASS	missense_variant	MODERATE	PLCB1	101092262	transcript	XM_023251450.1	protein_coding	14	c.1352C>T	p.Pro451Leu
chrA3	34928464	C	T	PASS	missense_variant	MODERATE	PLCB1	101092262	transcript	XM_023251452.1	protein_coding	14	c.1352C>T	p.Pro451Leu
chrA3	34928464	C	T	PASS	missense_variant	MODERATE	PLCB1	101092262	transcript	XM_023251451.1	protein_coding	14	c.1352C>T	p.Pro451Leu
chrA3	36684973	A	G	PASS	missense_variant	MODERATE	SLX4IP	101093175	transcript	XM_003983783.4	protein_coding	3	c.110A>G	p.Lys37Arg
chrA3	45325135	C	T	PASS	missense_variant	MODERATE	CRNKL1	101080882	transcript	XM_011280988.3	protein_coding	7	c.817G>A	p.Val273Ile
chrA3	60227125	C	T	PASS	missense_variant	MODERATE	IL18R1	493938	transcript	NM_001009863.2	protein_coding	6	c.784G>A	p.Glu262Lys
chrA3	60227125	C	T	PASS	missense_variant	MODERATE	IL18R1	493938	transcript	XM_023250909.1	protein_coding	8	c.784G>A	p.Glu262Lys
chrA3	60227125	C	T	PASS	missense_variant	MODERATE	IL18R1	493938	transcript	XM_023250910.1	protein_coding	8	c.784G>A	p.Glu262Lys
chrA3	62931638	G	A	PASS	missense_variant	MODERATE	REV1	102900457	transcript	XM_023251587.1	protein_coding	20	c.3212G>A	p.Arg1071Gln
chrA3	62931638	G	A	PASS	missense_variant	MODERATE	REV1	102900457	transcript	XM_023251588.1	protein_coding	19	c.3092G>A	p.Arg1031Gln
chrA3	62931638	G	A	PASS	missense_variant	MODERATE	REV1	102900457	transcript	XM_019827050.2	protein_coding	19	c.3002G>A	p.Arg1001Gln
chrA3	62931638	G	A	PASS	missense_variant	MODERATE	REV1	102900457	transcript	XM_019827051.2	protein_coding	19	c.3002G>A	p.Arg1001Gln
chrA3	62931638	G	A	PASS	missense_variant	MODERATE	REV1	102900457	transcript	XM_019827052.2	protein_coding	18	c.3002G>A	p.Arg1001Gln
chrA3	62931638	G	A	PASS	missense_variant	MODERATE	REV1	102900457	transcript	XM_011281065.3	protein_coding	18	c.3002G>A	p.Arg1001Gln
chrA3	62931638	G	A	PASS	missense_variant	MODERATE	REV1	102900457	transcript	XM_019827053.2	protein_coding	13	c.1757G>A	p.Arg586Gln
chrA3	62931638	G	A	PASS	missense_variant	MODERATE	REV1	102900457	transcript	XM_019827054.2	protein_coding	12	c.1646G>A	p.Arg549Gln
chrA3	62931642	C	A	PASS	missense_variant	MODERATE	REV1	102900457	transcript	XM_023251587.1	protein_coding	20	c.3216C>A	p.Asn1072Lys
chrA3	62931642	C	A	PASS	missense_variant	MODERATE	REV1	102900457	transcript	XM_023251588.1	protein_coding	19	c.3096C>A	p.Asn1032Lys
chrA3	62931642	C	A	PASS	missense_variant	MODERATE	REV1	102900457	transcript	XM_019827050.2	protein_coding	19	c.3006C>A	p.Asn1002Lys
chrA3	62931642	C	A	PASS	missense_variant	MODERATE	REV1	102900457	transcript	XM_019827051.2	protein_coding	19	c.3006C>A	p.Asn1002Lys
chrA3	62931642	C	A	PASS	missense_variant	MODERATE	REV1	102900457	transcript	XM_019827052.2	protein_coding	18	c.3006C>A	p.Asn1002Lys
chrA3	62931642	C	A	PASS	missense_variant	MODERATE	REV1	102900457	transcript	XM_011281065.3	protein_coding	18	c.3006C>A	p.Asn1002Lys
chrA3	62931642	C	A	PASS	missense_variant	MODERATE	REV1	102900457	transcript	XM_019827053.2	protein_coding	13	c.1761C>A	p.Asn587Lys
chrA3	62931642	C	A	PASS	missense_variant	MODERATE	REV1	102900457	transcript	XM_019827054.2	protein_coding	12	c.1650C>A	p.Asn550Lys
chrA3	62990772	TCGA	T	PASS	conservative_inframe_deletion	MODERATE	EIF5B	101095815	transcript	XM_023251589.1	protein_coding	5	c.370_372delTCG	p.Ser124del
chrA3	62990779	TGAA	T	PASS	disruptive_inframe_deletion	MODERATE	EIF5B	101095815	transcript	XM_023251589.1	protein_coding	5	c.363_365delTTC	p.Asp121_Ser122delinsGlu
chrA3	63360913	T	C	PASS	missense_variant	MODERATE	LOC101087915	101087915	transcript	XM_011281059.3	protein_coding	1	c.419A>G	p.Gln140Arg
chrA3	64095574	T	A	PASS	missense_variant	MODERATE	VWA3B	101096802	transcript	XM_019827072.2	protein_coding	22	c.2835A>T	p.Leu945Phe
chrA3	76148491	TCAGC	T	QD2	frameshift_variant	HIGH	RTN4	101091611	transcript	XM_019827207.2	protein_coding	3	c.2923_2926delGCTG	p.Ala975fs
chrA3	76148498	C	T	QD2	missense_variant	MODERATE	RTN4	101091611	transcript	XM_019827207.2	protein_coding	3	c.2920G>A	p.Glu974Lys
chrA3	88968745	C	A	PASS	splice_acceptor_variant&intron_variant	HIGH	NFU1	101093596	transcript	XM_003984083.5	protein_coding	7	c.718-1G>T
chrA3	88968745	C	A	PASS	splice_acceptor_variant&intron_variant	HIGH	NFU1	101093596	transcript	XM_011281121.3	protein_coding	5	c.298-1G>T
chrA3	88968745	C	A	PASS	splice_acceptor_variant&intron_variant	HIGH	NFU1	101093596	transcript	XM_023251732.1	protein_coding	7	c.646-1G>T
chrA3	88968745	C	A	PASS	splice_acceptor_variant&intron_variant	HIGH	NFU1	101093596	transcript	XM_011281120.3	protein_coding	7	c.655-1G>T
chrA3	88968745	C	A	PASS	splice_acceptor_variant&intron_variant	HIGH	NFU1	101093596	transcript	XM_011281119.3	protein_coding	7	c.646-1G>T
chrA3	104802696	G	A	PASS	missense_variant	MODERATE	PSD4	101080883	transcript	XM_006930290.4	protein_coding	17	c.3031C>T	p.Arg1011Cys
chrA3	104802696	G	A	PASS	missense_variant	MODERATE	PSD4	101080883	transcript	XM_019827563.2	protein_coding	17	c.3031C>T	p.Arg1011Cys
chrA3	104802696	G	A	PASS	missense_variant	MODERATE	PSD4	101080883	transcript	XM_019827564.2	protein_coding	17	c.3031C>T	p.Arg1011Cys
chrA3	104802696	G	A	PASS	missense_variant	MODERATE	PSD4	101080883	transcript	XM_023251870.1	protein_coding	18	c.3031C>T	p.Arg1011Cys
chrA3	104802696	G	A	PASS	missense_variant	MODERATE	PSD4	101080883	transcript	XM_023251871.1	protein_coding	19	c.3031C>T	p.Arg1011Cys
chrA3	104802696	G	A	PASS	missense_variant	MODERATE	PSD4	101080883	transcript	XM_023251872.1	protein_coding	17	c.3031C>T	p.Arg1011Cys
chrA3	105160891	TACAGGG	T	PASS	frameshift_variant&splice_acceptor_variant&splice_region_variant&intron_variant	HIGH	CKAP2L	101097473	transcript	XM_003984244.4	protein_coding	6	c.1615-4_1616delACAGGG	p.Gly539fs
chrA3	105160891	TACAGGG	T	PASS	frameshift_variant&splice_acceptor_variant&splice_region_variant&intron_variant	HIGH	CKAP2L	101097473	transcript	XM_019827572.2	protein_coding	6	c.1207-4_1208delACAGGG	p.Gly403fs
chrA3	105160891	TACAGGG	T	PASS	frameshift_variant&splice_acceptor_variant&splice_region_variant&intron_variant	HIGH	CKAP2L	101097473	transcript	XM_019827571.2	protein_coding	6	c.1207-4_1208delACAGGG	p.Gly403fs
chrA3	112758185	G	T	PASS	missense_variant	MODERATE	CEBPZ	101082486	transcript	XM_023252197.1	protein_coding	2	c.1406G>T	p.Cys469Phe
chrA3	112758193	C	T	PASS	missense_variant	MODERATE	CEBPZ	101082486	transcript	XM_023252197.1	protein_coding	2	c.1414C>T	p.Arg472Trp
chrA3	112801784	G	T	PASS	splice_acceptor_variant&intron_variant	HIGH	SULT6B1	101080275	transcript	XM_023251958.1	protein_coding	4	c.416-1G>T
chrA3	115737820	C	T	PASS	missense_variant	MODERATE	RASGRP3	101085456	transcript	XM_011281141.3	protein_coding	8	c.404G>A	p.Arg135Lys
chrA3	115737820	C	T	PASS	missense_variant	MODERATE	RASGRP3	101085456	transcript	XM_011281144.2	protein_coding	8	c.404G>A	p.Arg135Lys
chrA3	115737820	C	T	PASS	missense_variant	MODERATE	RASGRP3	101085456	transcript	XM_011281147.2	protein_coding	7	c.404G>A	p.Arg135Lys
chrA3	115737820	C	T	PASS	missense_variant	MODERATE	RASGRP3	101085456	transcript	XM_019827694.2	protein_coding	8	c.365G>A	p.Arg122Lys
chrA3	115737820	C	T	PASS	missense_variant	MODERATE	RASGRP3	101085456	transcript	XM_019827693.1	protein_coding	8	c.404G>A	p.Arg135Lys
chrA3	115737820	C	T	PASS	missense_variant	MODERATE	RASGRP3	101085456	transcript	XM_011281145.3	protein_coding	7	c.404G>A	p.Arg135Lys
chrA3	115737820	C	T	PASS	missense_variant	MODERATE	RASGRP3	101085456	transcript	XM_011281146.3	protein_coding	7	c.404G>A	p.Arg135Lys
chrA3	115737820	C	T	PASS	missense_variant	MODERATE	RASGRP3	101085456	transcript	XM_019827692.2	protein_coding	9	c.404G>A	p.Arg135Lys
chrA3	115737824	G	T	PASS	missense_variant	MODERATE	RASGRP3	101085456	transcript	XM_011281141.3	protein_coding	8	c.400C>A	p.Gln134Lys
chrA3	115737824	G	T	PASS	missense_variant	MODERATE	RASGRP3	101085456	transcript	XM_011281144.2	protein_coding	8	c.400C>A	p.Gln134Lys
chrA3	115737824	G	T	PASS	missense_variant	MODERATE	RASGRP3	101085456	transcript	XM_011281147.2	protein_coding	7	c.400C>A	p.Gln134Lys
chrA3	115737824	G	T	PASS	missense_variant	MODERATE	RASGRP3	101085456	transcript	XM_019827694.2	protein_coding	8	c.361C>A	p.Gln121Lys
chrA3	115737824	G	T	PASS	missense_variant	MODERATE	RASGRP3	101085456	transcript	XM_019827693.1	protein_coding	8	c.400C>A	p.Gln134Lys
chrA3	115737824	G	T	PASS	missense_variant	MODERATE	RASGRP3	101085456	transcript	XM_011281145.3	protein_coding	7	c.400C>A	p.Gln134Lys
chrA3	115737824	G	T	PASS	missense_variant	MODERATE	RASGRP3	101085456	transcript	XM_011281146.3	protein_coding	7	c.400C>A	p.Gln134Lys
chrA3	115737824	G	T	PASS	missense_variant	MODERATE	RASGRP3	101085456	transcript	XM_019827692.2	protein_coding	9	c.400C>A	p.Gln134Lys
chrA3	115737826	G	T	PASS	missense_variant	MODERATE	RASGRP3	101085456	transcript	XM_011281141.3	protein_coding	8	c.398C>A	p.Thr133Lys
chrA3	115737826	G	T	PASS	missense_variant	MODERATE	RASGRP3	101085456	transcript	XM_011281144.2	protein_coding	8	c.398C>A	p.Thr133Lys
chrA3	115737826	G	T	PASS	missense_variant	MODERATE	RASGRP3	101085456	transcript	XM_011281147.2	protein_coding	7	c.398C>A	p.Thr133Lys
chrA3	115737826	G	T	PASS	missense_variant	MODERATE	RASGRP3	101085456	transcript	XM_019827694.2	protein_coding	8	c.359C>A	p.Thr120Lys
chrA3	115737826	G	T	PASS	missense_variant	MODERATE	RASGRP3	101085456	transcript	XM_019827693.1	protein_coding	8	c.398C>A	p.Thr133Lys
chrA3	115737826	G	T	PASS	missense_variant	MODERATE	RASGRP3	101085456	transcript	XM_011281145.3	protein_coding	7	c.398C>A	p.Thr133Lys
chrA3	115737826	G	T	PASS	missense_variant	MODERATE	RASGRP3	101085456	transcript	XM_011281146.3	protein_coding	7	c.398C>A	p.Thr133Lys
chrA3	115737826	G	T	PASS	missense_variant	MODERATE	RASGRP3	101085456	transcript	XM_019827692.2	protein_coding	9	c.398C>A	p.Thr133Lys
chrA3	116649310	G	T	PASS	missense_variant	MODERATE	BIRC6	101087396	transcript	XM_019827703.2	protein_coding	56	c.10758C>A	p.Ser3586Arg
chrA3	116649311	C	T	PASS	missense_variant	MODERATE	BIRC6	101087396	transcript	XM_019827703.2	protein_coding	56	c.10757G>A	p.Ser3586Asn
chrA3	116649313	A	T	PASS	missense_variant	MODERATE	BIRC6	101087396	transcript	XM_019827703.2	protein_coding	56	c.10755T>A	p.Asp3585Glu
chrA3	116649315	C	T	PASS	missense_variant	MODERATE	BIRC6	101087396	transcript	XM_019827703.2	protein_coding	56	c.10753G>A	p.Asp3585Asn
chrA3	116649316	A	T	PASS	missense_variant	MODERATE	BIRC6	101087396	transcript	XM_019827703.2	protein_coding	56	c.10752T>A	p.Asp3584Glu
chrA3	116649318	C	T	PASS	missense_variant	MODERATE	BIRC6	101087396	transcript	XM_019827703.2	protein_coding	56	c.10750G>A	p.Asp3584Asn
chrA3	116649320	G	T	PASS	missense_variant	MODERATE	BIRC6	101087396	transcript	XM_019827703.2	protein_coding	56	c.10748C>A	p.Thr3583Asn
chrA3	119555147	G	A	PASS	missense_variant	MODERATE	ALK	101091689	transcript	XM_003984359.5	protein_coding	29	c.4378G>A	p.Gly1460Ser
chrA3	119555147	G	A	PASS	missense_variant	MODERATE	ALK	101091689	transcript	XM_023251978.1	protein_coding	14	c.1504G>A	p.Gly502Ser
chrA3	119555147	G	A	PASS	missense_variant	MODERATE	ALK	101091689	transcript	XM_023251980.1	protein_coding	14	c.1504G>A	p.Gly502Ser
chrA3	120876083	G	T	PASS	missense_variant	MODERATE	SLC4A1AP	101089851	transcript	XM_011281288.3	protein_coding	10	c.1943C>A	p.Thr648Lys
chrA3	120876087	C	T	PASS	missense_variant	MODERATE	SLC4A1AP	101089851	transcript	XM_011281288.3	protein_coding	10	c.1939G>A	p.Glu647Lys
chrA3	120876092	G	T	PASS	missense_variant	MODERATE	SLC4A1AP	101089851	transcript	XM_011281288.3	protein_coding	10	c.1934C>A	p.Ser645Tyr
chrA3	120876093	A	T	PASS	missense_variant	MODERATE	SLC4A1AP	101089851	transcript	XM_011281288.3	protein_coding	10	c.1933T>A	p.Ser645Thr
chrA3	120938451	T	A	PASS	missense_variant	MODERATE	CCDC121	101090096	transcript	XM_003984444.5	protein_coding	2	c.768T>A	p.His256Gln
chrA3	120938452	T	A	PASS	missense_variant	MODERATE	CCDC121	101090096	transcript	XM_003984444.5	protein_coding	2	c.769T>A	p.Tyr257Asn
chrA3	120938454	T	A	PASS	stop_gained	HIGH	CCDC121	101090096	transcript	XM_003984444.5	protein_coding	2	c.771T>A	p.Tyr257*
chrA3	120938455	T	A	PASS	missense_variant	MODERATE	CCDC121	101090096	transcript	XM_003984444.5	protein_coding	2	c.772T>A	p.Leu258Ile
chrA3	120938456	T	A	PASS	stop_gained	HIGH	CCDC121	101090096	transcript	XM_003984444.5	protein_coding	2	c.773T>A	p.Leu258*
chrA3	120938458	C	A	PASS	missense_variant	MODERATE	CCDC121	101090096	transcript	XM_003984444.5	protein_coding	2	c.775C>A	p.Gln259Lys
chrA3	134785424	ATTGTG	A	PASS	frameshift_variant	HIGH	ROCK2	101094501	transcript	XM_006930517.4	protein_coding	3	c.233_237delTTGTG	p.Ile78fs
chrA3	134785424	ATTGTG	A	PASS	frameshift_variant	HIGH	ROCK2	101094501	transcript	XM_023252104.1	protein_coding	3	c.233_237delTTGTG	p.Ile78fs
chrA3	134785424	ATTGTG	A	PASS	frameshift_variant	HIGH	ROCK2	101094501	transcript	XM_023252106.1	protein_coding	3	c.233_237delTTGTG	p.Ile78fs
chrA3	134785424	ATTGTG	A	PASS	frameshift_variant	HIGH	ROCK2	101094501	transcript	XM_019827905.2	protein_coding	3	c.233_237delTTGTG	p.Ile78fs
chrA3	134785424	ATTGTG	A	PASS	frameshift_variant	HIGH	ROCK2	101094501	transcript	XM_023252105.1	protein_coding	3	c.233_237delTTGTG	p.Ile78fs
chrA3	134785424	ATTGTG	A	PASS	frameshift_variant	HIGH	ROCK2	101094501	transcript	XM_023252107.1	protein_coding	3	c.233_237delTTGTG	p.Ile78fs
chrA3	140905417	C	T	PASS	missense_variant	MODERATE	RNASEH1	101097476	transcript	XM_011281342.3	protein_coding	7	c.734C>T	p.Ala245Val
chrA3	140905417	C	T	PASS	missense_variant	MODERATE	RNASEH1	101097476	transcript	XM_019827968.2	protein_coding	7	c.734C>T	p.Ala245Val
chrA3	140905417	C	T	PASS	missense_variant	MODERATE	RNASEH1	101097476	transcript	XM_011281343.3	protein_coding	7	c.734C>T	p.Ala245Val
chrA3	140907050	T	C	PASS	missense_variant	MODERATE	RNASEH1	101097476	transcript	XM_011281342.3	protein_coding	8	c.847T>C	p.Ser283Pro
chrA3	140907050	T	C	PASS	missense_variant	MODERATE	RNASEH1	101097476	transcript	XM_019827968.2	protein_coding	8	c.847T>C	p.Ser283Pro
chrA3	140907050	T	C	PASS	missense_variant	MODERATE	RNASEH1	101097476	transcript	XM_011281343.3	protein_coding	8	c.847T>C	p.Ser283Pro
chrB1	14781896	C	T	PASS	missense_variant	MODERATE	TRAPPC11	101088831	transcript	XM_011281376.3	protein_coding	18	c.1816C>T	p.Arg606Trp
chrB1	14781896	C	T	PASS	missense_variant	MODERATE	TRAPPC11	101088831	transcript	XM_019828244.2	protein_coding	18	c.1816C>T	p.Arg606Trp
chrB1	17116659	C	T	QD2	missense_variant	MODERATE	LOC101097556	101097556	transcript	XM_023252373.1	protein_coding	10	c.1177C>T	p.Pro393Ser
chrB1	17116660	C	T	QD2	missense_variant	MODERATE	LOC101097556	101097556	transcript	XM_023252373.1	protein_coding	10	c.1178C>T	p.Pro393Leu
chrB1	17116663	C	T	QD2	missense_variant	MODERATE	LOC101097556	101097556	transcript	XM_023252373.1	protein_coding	10	c.1181C>T	p.Ser394Phe
chrB1	17116665	G	T	QD2	missense_variant	MODERATE	LOC101097556	101097556	transcript	XM_023252373.1	protein_coding	10	c.1183G>T	p.Val395Phe
chrB1	17116668	C	T	QD2	missense_variant	MODERATE	LOC101097556	101097556	transcript	XM_023252373.1	protein_coding	10	c.1186C>T	p.Pro396Ser
chrB1	18747914	C	A	PASS	stop_gained	HIGH	TRIML2	101099545	transcript	XM_019828286.2	protein_coding	8	c.790G>T	p.Glu264*
chrB1	18747914	C	A	PASS	stop_gained	HIGH	TRIML2	101099545	transcript	XM_023252377.1	protein_coding	7	c.790G>T	p.Glu264*
chrB1	18747916	G	A	PASS	missense_variant	MODERATE	TRIML2	101099545	transcript	XM_019828286.2	protein_coding	8	c.788C>T	p.Ser263Phe
chrB1	18747916	G	A	PASS	missense_variant	MODERATE	TRIML2	101099545	transcript	XM_023252377.1	protein_coding	7	c.788C>T	p.Ser263Phe
chrB1	18747918	T	A	QD2	missense_variant	MODERATE	TRIML2	101099545	transcript	XM_019828286.2	protein_coding	8	c.786A>T	p.Leu262Phe
chrB1	18747918	T	A	QD2	missense_variant	MODERATE	TRIML2	101099545	transcript	XM_023252377.1	protein_coding	7	c.786A>T	p.Leu262Phe
chrB1	18747923	C	A	QD2	missense_variant	MODERATE	TRIML2	101099545	transcript	XM_019828286.2	protein_coding	8	c.781G>T	p.Val261Phe
chrB1	18747923	C	A	QD2	missense_variant	MODERATE	TRIML2	101099545	transcript	XM_023252377.1	protein_coding	7	c.781G>T	p.Val261Phe
chrB1	18747924	C	A	QD2	missense_variant	MODERATE	TRIML2	101099545	transcript	XM_019828286.2	protein_coding	8	c.780G>T	p.Leu260Phe
chrB1	18747924	C	A	QD2	missense_variant	MODERATE	TRIML2	101099545	transcript	XM_023252377.1	protein_coding	7	c.780G>T	p.Leu260Phe
chrB1	28723794	TCCTGGCAG	T	PASS	frameshift_variant	HIGH	TEX15	102899051	transcript	XM_019828368.2	protein_coding	8	c.7494_7501delCTGCCAGG	p.His2498fs
chrB1	28723794	TCCTGGCAG	T	PASS	frameshift_variant	HIGH	TEX15	102899051	transcript	XM_023252440.1	protein_coding	2	c.6411_6418delCTGCCAGG	p.His2137fs
chrB1	28723804	G	T	PASS	missense_variant	MODERATE	TEX15	102899051	transcript	XM_019828368.2	protein_coding	8	c.7492C>A	p.His2498Asn
chrB1	28723804	G	T	PASS	missense_variant	MODERATE	TEX15	102899051	transcript	XM_023252440.1	protein_coding	2	c.6409C>A	p.His2137Asn
chrB1	31792703	C	T	PASS	missense_variant	MODERATE	LOC102900107	102900107	transcript	XM_011281437.3	protein_coding	4	c.482G>A	p.Arg161His
chrB1	31792703	C	T	PASS	missense_variant	MODERATE	LOC102900107	102900107	transcript	XM_019828413.2	protein_coding	4	c.482G>A	p.Arg161His
chrB1	31792703	C	T	PASS	missense_variant	MODERATE	LOC102900107	102900107	transcript	XM_019828414.2	protein_coding	4	c.482G>A	p.Arg161His
chrB1	31792703	C	T	PASS	missense_variant	MODERATE	LOC102900107	102900107	transcript	XM_006930621.3	protein_coding	4	c.482G>A	p.Arg161His
chrB1	31792703	C	T	PASS	missense_variant	MODERATE	LOC102900107	102900107	transcript	XM_019828416.2	protein_coding	3	c.386G>A	p.Arg129His
chrB1	36016249	A	G	PASS	missense_variant	MODERATE	LGI3	101089853	transcript	XM_003984713.5	protein_coding	3	c.296A>G	p.Lys99Arg
chrB1	36016249	A	G	PASS	missense_variant	MODERATE	LGI3	101089853	transcript	XM_019828447.2	protein_coding	3	c.296A>G	p.Lys99Arg
chrB1	42169210	T	C	PASS	missense_variant	MODERATE	HOOK3	101101306	transcript	XM_023252550.1	protein_coding	1	c.8A>G	p.Asn3Ser
chrB1	42169210	T	C	PASS	missense_variant	MODERATE	HOOK3	101101306	transcript	XM_019828496.2	protein_coding	1	c.8A>G	p.Asn3Ser
chrB1	42169210	T	C	PASS	missense_variant	MODERATE	HOOK3	101101306	transcript	XM_023252551.1	protein_coding	1	c.8A>G	p.Asn3Ser
chrB1	44778820	GTTCCTCCT	G	PASS	splice_acceptor_variant&conservative_inframe_deletion&splice_region_variant&intron_variant	HIGH	IDO1	101096977	transcript	XM_003984814.3	protein_coding	2	c.100-2_105delAGGAGGAA	p.Glu34_Leu36del
chrB1	55169890	T	A	PASS	missense_variant	MODERATE	DEFB136	109499350	transcript	XM_019829911.2	protein_coding	1	c.16A>T	p.Ile6Phe
chrB1	65332394	A	G	PASS	missense_variant	MODERATE	LOC101097889	101097889	transcript	XM_019828738.2	protein_coding	1	c.1387T>C	p.Cys463Arg
chrB1	66972603	G	A	PASS	missense_variant	MODERATE	LOC111560221	111560221	transcript	XM_023253391.1	protein_coding	3	c.2876C>T	p.Ala959Val
chrB1	104090700	G	T	PASS	missense_variant	MODERATE	ADAD1	101090859	transcript	XM_019829001.2	protein_coding	4	c.493C>A	p.Gln165Lys
chrB1	104090700	G	T	PASS	missense_variant	MODERATE	ADAD1	101090859	transcript	XM_019829002.2	protein_coding	4	c.433C>A	p.Gln145Lys
chrB1	104090700	G	T	PASS	missense_variant	MODERATE	ADAD1	101090859	transcript	XM_019829003.2	protein_coding	4	c.493C>A	p.Gln165Lys
chrB1	104090700	G	T	PASS	missense_variant	MODERATE	ADAD1	101090859	transcript	XM_011281674.3	protein_coding	4	c.493C>A	p.Gln165Lys
chrB1	104090701	TCCCA	T	PASS	frameshift_variant	HIGH	ADAD1	101090859	transcript	XM_019829001.2	protein_coding	4	c.488_491delTGGG	p.Leu163fs
chrB1	104090701	TCCCA	T	PASS	frameshift_variant	HIGH	ADAD1	101090859	transcript	XM_019829002.2	protein_coding	4	c.428_431delTGGG	p.Leu143fs
chrB1	104090701	TCCCA	T	PASS	frameshift_variant	HIGH	ADAD1	101090859	transcript	XM_019829003.2	protein_coding	4	c.488_491delTGGG	p.Leu163fs
chrB1	104090701	TCCCA	T	PASS	frameshift_variant	HIGH	ADAD1	101090859	transcript	XM_011281674.3	protein_coding	4	c.488_491delTGGG	p.Leu163fs
chrB1	116536636	T	G	PASS	missense_variant	MODERATE	ETNPPL	101087400	transcript	XM_023252872.1	protein_coding	13	c.1599T>G	p.Ser533Arg
chrB1	120887869	C	A	PASS	missense_variant	MODERATE	TACR3	101093603	transcript	XM_003985120.4	protein_coding	1	c.250C>A	p.Arg84Ser
chrB1	125707787	TACAGAAG	T	PASS	splice_acceptor_variant&conservative_inframe_deletion&splice_region_variant&intron_variant	HIGH	STPG2	101089186	transcript	XM_023252922.1	protein_coding	4	c.382-4_384delACAGAAG	p.Lys128_Phe129del
chrB1	129317256	C	T	PASS	missense_variant	MODERATE	LOC111560165	111560165	transcript	XM_023252932.1	protein_coding	1	c.1699G>A	p.Ala567Thr
chrB1	135642119	TAGGATCC	T	PASS	frameshift_variant&splice_acceptor_variant&splice_region_variant&intron_variant	HIGH	HSD17B11	101096312	transcript	XM_003985194.5	protein_coding	7	c.813-2_817delAGGATCC	p.Arg271fs
chrB1	143010280	A	T	PASS	missense_variant	MODERATE	NAA11	101094415	transcript	XM_006931033.3	protein_coding	1	c.590A>T	p.Lys197Met
chrB1	145447304	A	T	PASS	splice_acceptor_variant&intron_variant	HIGH	LOC109499110	109499110	transcript	XR_002741857.1	pseudogene	3	n.410-2A>T
chrB1	145447305	G	T	PASS	splice_acceptor_variant&intron_variant	HIGH	LOC109499110	109499110	transcript	XR_002741857.1	pseudogene	3	n.410-1G>T
chrB1	145827727	TCACA	T	PASS	frameshift_variant	HIGH	STBD1	101091107	transcript	XM_003985320.4	protein_coding	2	c.729_732delTGTG	p.Asp243fs
chrB1	146645108	A	C	PASS	missense_variant	MODERATE	ODAPH	101092359	transcript	XM_019829356.2	protein_coding	2	c.315T>G	p.Phe105Leu
chrB1	151790096	C	T	PASS	missense_variant	MODERATE	YTHDC1	101087921	transcript	XM_019829412.2	protein_coding	3	c.157G>A	p.Glu53Lys
chrB1	151790096	C	T	PASS	missense_variant	MODERATE	YTHDC1	101087921	transcript	XM_003985312.4	protein_coding	2	c.121G>A	p.Glu41Lys
chrB1	151790096	C	T	PASS	missense_variant	MODERATE	YTHDC1	101087921	transcript	XM_003985313.4	protein_coding	2	c.121G>A	p.Glu41Lys
chrB1	151790096	C	T	PASS	missense_variant	MODERATE	YTHDC1	101087921	transcript	XM_006931083.3	protein_coding	2	c.121G>A	p.Glu41Lys
chrB1	151790096	C	T	PASS	missense_variant	MODERATE	YTHDC1	101087921	transcript	XM_019829413.2	protein_coding	3	c.157G>A	p.Glu53Lys
chrB1	151790096	C	T	PASS	missense_variant	MODERATE	YTHDC1	101087921	transcript	XM_019829414.2	protein_coding	3	c.157G>A	p.Glu53Lys
chrB1	151790097	G	T	PASS	missense_variant	MODERATE	YTHDC1	101087921	transcript	XM_019829412.2	protein_coding	3	c.156C>A	p.Asn52Lys
chrB1	151790097	G	T	PASS	missense_variant	MODERATE	YTHDC1	101087921	transcript	XM_003985312.4	protein_coding	2	c.120C>A	p.Asn40Lys
chrB1	151790097	G	T	PASS	missense_variant	MODERATE	YTHDC1	101087921	transcript	XM_003985313.4	protein_coding	2	c.120C>A	p.Asn40Lys
chrB1	151790097	G	T	PASS	missense_variant	MODERATE	YTHDC1	101087921	transcript	XM_006931083.3	protein_coding	2	c.120C>A	p.Asn40Lys
chrB1	151790097	G	T	PASS	missense_variant	MODERATE	YTHDC1	101087921	transcript	XM_019829413.2	protein_coding	3	c.156C>A	p.Asn52Lys
chrB1	151790097	G	T	PASS	missense_variant	MODERATE	YTHDC1	101087921	transcript	XM_019829414.2	protein_coding	3	c.156C>A	p.Asn52Lys
chrB1	151790103	A	T	PASS	missense_variant	MODERATE	YTHDC1	101087921	transcript	XM_019829412.2	protein_coding	3	c.150T>A	p.Asp50Glu
chrB1	151790103	A	T	PASS	missense_variant	MODERATE	YTHDC1	101087921	transcript	XM_003985312.4	protein_coding	2	c.114T>A	p.Asp38Glu
chrB1	151790103	A	T	PASS	missense_variant	MODERATE	YTHDC1	101087921	transcript	XM_003985313.4	protein_coding	2	c.114T>A	p.Asp38Glu
chrB1	151790103	A	T	PASS	missense_variant	MODERATE	YTHDC1	101087921	transcript	XM_006931083.3	protein_coding	2	c.114T>A	p.Asp38Glu
chrB1	151790103	A	T	PASS	missense_variant	MODERATE	YTHDC1	101087921	transcript	XM_019829413.2	protein_coding	3	c.150T>A	p.Asp50Glu
chrB1	151790103	A	T	PASS	missense_variant	MODERATE	YTHDC1	101087921	transcript	XM_019829414.2	protein_coding	3	c.150T>A	p.Asp50Glu
chrB1	151790105	C	T	PASS	missense_variant	MODERATE	YTHDC1	101087921	transcript	XM_019829412.2	protein_coding	3	c.148G>A	p.Asp50Asn
chrB1	151790105	C	T	PASS	missense_variant	MODERATE	YTHDC1	101087921	transcript	XM_003985312.4	protein_coding	2	c.112G>A	p.Asp38Asn
chrB1	151790105	C	T	PASS	missense_variant	MODERATE	YTHDC1	101087921	transcript	XM_003985313.4	protein_coding	2	c.112G>A	p.Asp38Asn
chrB1	151790105	C	T	PASS	missense_variant	MODERATE	YTHDC1	101087921	transcript	XM_006931083.3	protein_coding	2	c.112G>A	p.Asp38Asn
chrB1	151790105	C	T	PASS	missense_variant	MODERATE	YTHDC1	101087921	transcript	XM_019829413.2	protein_coding	3	c.148G>A	p.Asp50Asn
chrB1	151790105	C	T	PASS	missense_variant	MODERATE	YTHDC1	101087921	transcript	XM_019829414.2	protein_coding	3	c.148G>A	p.Asp50Asn
chrB1	165119940	C	A	PASS	missense_variant	MODERATE	LNX1	101091782	transcript	XM_011281882.3	protein_coding	13	c.2146C>A	p.Leu716Ile
chrB1	165119940	C	A	PASS	missense_variant	MODERATE	LNX1	101091782	transcript	XM_019829496.2	protein_coding	13	c.2146C>A	p.Leu716Ile
chrB1	165119940	C	A	PASS	missense_variant	MODERATE	LNX1	101091782	transcript	XM_011281883.3	protein_coding	10	c.1846C>A	p.Leu616Ile
chrB1	165119940	C	A	PASS	missense_variant	MODERATE	LNX1	101091782	transcript	XM_019829497.2	protein_coding	11	c.1804C>A	p.Leu602Ile
chrB1	165119940	C	A	PASS	missense_variant	MODERATE	LNX1	101091782	transcript	XM_023253103.1	protein_coding	10	c.1927C>A	p.Leu643Ile
chrB1	165119941	T	A	PASS	missense_variant	MODERATE	LNX1	101091782	transcript	XM_011281882.3	protein_coding	13	c.2147T>A	p.Leu716His
chrB1	165119941	T	A	PASS	missense_variant	MODERATE	LNX1	101091782	transcript	XM_019829496.2	protein_coding	13	c.2147T>A	p.Leu716His
chrB1	165119941	T	A	PASS	missense_variant	MODERATE	LNX1	101091782	transcript	XM_011281883.3	protein_coding	10	c.1847T>A	p.Leu616His
chrB1	165119941	T	A	PASS	missense_variant	MODERATE	LNX1	101091782	transcript	XM_019829497.2	protein_coding	11	c.1805T>A	p.Leu602His
chrB1	165119941	T	A	PASS	missense_variant	MODERATE	LNX1	101091782	transcript	XM_023253103.1	protein_coding	10	c.1928T>A	p.Leu643His
chrB1	165119946	G	A	PASS	missense_variant	MODERATE	LNX1	101091782	transcript	XM_011281882.3	protein_coding	13	c.2152G>A	p.Gly718Arg
chrB1	165119946	G	A	PASS	missense_variant	MODERATE	LNX1	101091782	transcript	XM_019829496.2	protein_coding	13	c.2152G>A	p.Gly718Arg
chrB1	165119946	G	A	PASS	missense_variant	MODERATE	LNX1	101091782	transcript	XM_011281883.3	protein_coding	10	c.1852G>A	p.Gly618Arg
chrB1	165119946	G	A	PASS	missense_variant	MODERATE	LNX1	101091782	transcript	XM_019829497.2	protein_coding	11	c.1810G>A	p.Gly604Arg
chrB1	165119946	G	A	PASS	missense_variant	MODERATE	LNX1	101091782	transcript	XM_023253103.1	protein_coding	10	c.1933G>A	p.Gly645Arg
chrB1	165119947	G	A	PASS	missense_variant	MODERATE	LNX1	101091782	transcript	XM_011281882.3	protein_coding	13	c.2153G>A	p.Gly718Glu
chrB1	165119947	G	A	PASS	missense_variant	MODERATE	LNX1	101091782	transcript	XM_019829496.2	protein_coding	13	c.2153G>A	p.Gly718Glu
chrB1	165119947	G	A	PASS	missense_variant	MODERATE	LNX1	101091782	transcript	XM_011281883.3	protein_coding	10	c.1853G>A	p.Gly618Glu
chrB1	165119947	G	A	PASS	missense_variant	MODERATE	LNX1	101091782	transcript	XM_019829497.2	protein_coding	11	c.1811G>A	p.Gly604Glu
chrB1	165119947	G	A	PASS	missense_variant	MODERATE	LNX1	101091782	transcript	XM_023253103.1	protein_coding	10	c.1934G>A	p.Gly645Glu
chrB1	168415171	G	A	PASS	missense_variant	MODERATE	GABRA4	101098052	transcript	XM_003985405.5	protein_coding	1	c.25G>A	p.Ala9Thr
chrB1	174906687	TCC	T	PASS	frameshift_variant	HIGH	LIAS	101083674	transcript	XM_003985433.4	protein_coding	2	c.99_100delGG	p.Glu34fs
chrB1	174906687	TCC	T	PASS	frameshift_variant	HIGH	LIAS	101083674	transcript	XM_023253190.1	protein_coding	2	c.99_100delGG	p.Glu34fs
chrB1	174906691	C	T	PASS	missense_variant	MODERATE	LIAS	101083674	transcript	XM_003985433.4	protein_coding	2	c.97G>A	p.Glu33Lys
chrB1	174906691	C	T	PASS	missense_variant	MODERATE	LIAS	101083674	transcript	XM_023253190.1	protein_coding	2	c.97G>A	p.Glu33Lys
chrB1	175174220	TGCCAGGTGAA	T	QD2	frameshift_variant	HIGH	WDR19	101084624	transcript	XM_003985437.4	protein_coding	2	c.55_64delTTCACCTGGC	p.Phe19fs
chrB1	175174220	TGCCAGGTGAA	T	QD2	frameshift_variant	HIGH	WDR19	101084624	transcript	XM_006931161.3	protein_coding	2	c.55_64delTTCACCTGGC	p.Phe19fs
chrB1	175174220	TGCCAGGTGAA	T	QD2	frameshift_variant	HIGH	WDR19	101084624	transcript	XM_019829626.1	protein_coding	2	c.55_64delTTCACCTGGC	p.Phe19fs
chrB1	177858716	C	A	PASS	missense_variant	MODERATE	ARAP2	101096980	transcript	XM_019829657.2	protein_coding	28	c.4314C>A	p.Ser1438Arg
chrB1	182708537	G	T	PASS	missense_variant	MODERATE	PCDH7	102902647	transcript	XM_023253216.1	protein_coding	1	c.2838C>A	p.Asn946Lys
chrB1	182708537	G	T	PASS	missense_variant	MODERATE	PCDH7	102902647	transcript	XM_019829661.2	protein_coding	1	c.2838C>A	p.Asn946Lys
chrB1	182708537	G	T	PASS	missense_variant	MODERATE	PCDH7	102902647	transcript	XM_023253217.1	protein_coding	1	c.2838C>A	p.Asn946Lys
chrB1	182708537	G	T	PASS	missense_variant	MODERATE	PCDH7	102902647	transcript	XM_023253218.1	protein_coding	1	c.2838C>A	p.Asn946Lys
chrB1	182708537	G	T	PASS	missense_variant	MODERATE	PCDH7	102902647	transcript	XM_023253219.1	protein_coding	1	c.2838C>A	p.Asn946Lys
chrB1	182708537	G	T	PASS	missense_variant	MODERATE	PCDH7	102902647	transcript	XM_023253220.1	protein_coding	1	c.2838C>A	p.Asn946Lys
chrB1	182708537	G	T	PASS	missense_variant	MODERATE	PCDH7	102902647	transcript	XM_023253224.1	protein_coding	1	c.2838C>A	p.Asn946Lys
chrB1	182708537	G	T	PASS	missense_variant	MODERATE	PCDH7	102902647	transcript	XM_023253221.1	protein_coding	1	c.2838C>A	p.Asn946Lys
chrB1	182708537	G	T	PASS	missense_variant	MODERATE	PCDH7	102902647	transcript	XM_023253222.1	protein_coding	1	c.2838C>A	p.Asn946Lys
chrB1	182708537	G	T	PASS	missense_variant	MODERATE	PCDH7	102902647	transcript	XM_023253223.1	protein_coding	1	c.2838C>A	p.Asn946Lys
chrB1	182708546	G	T	PASS	missense_variant	MODERATE	PCDH7	102902647	transcript	XM_023253216.1	protein_coding	1	c.2829C>A	p.Asp943Glu
chrB1	182708546	G	T	PASS	missense_variant	MODERATE	PCDH7	102902647	transcript	XM_019829661.2	protein_coding	1	c.2829C>A	p.Asp943Glu
chrB1	182708546	G	T	PASS	missense_variant	MODERATE	PCDH7	102902647	transcript	XM_023253217.1	protein_coding	1	c.2829C>A	p.Asp943Glu
chrB1	182708546	G	T	PASS	missense_variant	MODERATE	PCDH7	102902647	transcript	XM_023253218.1	protein_coding	1	c.2829C>A	p.Asp943Glu
chrB1	182708546	G	T	PASS	missense_variant	MODERATE	PCDH7	102902647	transcript	XM_023253219.1	protein_coding	1	c.2829C>A	p.Asp943Glu
chrB1	182708546	G	T	PASS	missense_variant	MODERATE	PCDH7	102902647	transcript	XM_023253220.1	protein_coding	1	c.2829C>A	p.Asp943Glu
chrB1	182708546	G	T	PASS	missense_variant	MODERATE	PCDH7	102902647	transcript	XM_023253224.1	protein_coding	1	c.2829C>A	p.Asp943Glu
chrB1	182708546	G	T	PASS	missense_variant	MODERATE	PCDH7	102902647	transcript	XM_023253221.1	protein_coding	1	c.2829C>A	p.Asp943Glu
chrB1	182708546	G	T	PASS	missense_variant	MODERATE	PCDH7	102902647	transcript	XM_023253222.1	protein_coding	1	c.2829C>A	p.Asp943Glu
chrB1	182708546	G	T	PASS	missense_variant	MODERATE	PCDH7	102902647	transcript	XM_023253223.1	protein_coding	1	c.2829C>A	p.Asp943Glu
chrB1	186448940	ACCTATTTTTTT	A	PASS	frameshift_variant&splice_acceptor_variant&splice_region_variant&intron_variant	HIGH	TBC1D19	101099713	transcript	XM_003985476.5	protein_coding	3	c.173-10_173delAAAAAAATAGG	p.Gly58fs
chrB1	186448940	ACCTATTTTTTT	A	PASS	frameshift_variant&splice_acceptor_variant&splice_region_variant&intron_variant	HIGH	TBC1D19	101099713	transcript	XM_019829664.2	protein_coding	3	c.173-10_173delAAAAAAATAGG	p.Gly58fs
chrB1	204837063	G	A	PASS	missense_variant	MODERATE	SH3TC1	101089262	transcript	XM_023253417.1	protein_coding	13	c.2612G>A	p.Arg871Gln
chrB1	204837063	G	A	PASS	missense_variant	MODERATE	SH3TC1	101089262	transcript	XM_023253418.1	protein_coding	13	c.2612G>A	p.Arg871Gln
chrB1	204837063	G	A	PASS	missense_variant	MODERATE	SH3TC1	101089262	transcript	XM_023253424.1	protein_coding	13	c.2612G>A	p.Arg871Gln
chrB1	204837063	G	A	PASS	missense_variant	MODERATE	SH3TC1	101089262	transcript	XM_023253422.1	protein_coding	12	c.2528G>A	p.Arg843Gln
chrB1	204837063	G	A	PASS	missense_variant	MODERATE	SH3TC1	101089262	transcript	XM_023253420.1	protein_coding	13	c.2612G>A	p.Arg871Gln
chrB1	204837063	G	A	PASS	missense_variant	MODERATE	SH3TC1	101089262	transcript	XM_023253421.1	protein_coding	13	c.2612G>A	p.Arg871Gln
chrB1	204837063	G	A	PASS	missense_variant	MODERATE	SH3TC1	101089262	transcript	XM_023253419.1	protein_coding	13	c.2612G>A	p.Arg871Gln
chrB1	204837063	G	A	PASS	missense_variant	MODERATE	SH3TC1	101089262	transcript	XM_023253423.1	protein_coding	12	c.2366G>A	p.Arg789Gln
chrB1	204837063	G	A	PASS	missense_variant	MODERATE	SH3TC1	101089262	transcript	XM_023253425.1	protein_coding	11	c.2279G>A	p.Arg760Gln
chrB1	205674730	G	A	PASS	missense_variant	MODERATE	DOK7	101087477	transcript	XM_023253343.1	protein_coding	7	c.1240C>T	p.Arg414Trp
chrB1	205674730	G	A	PASS	missense_variant	MODERATE	DOK7	101087477	transcript	XM_023253344.1	protein_coding	7	c.1216C>T	p.Arg406Trp
chrB1	205674854	C	T	PASS	missense_variant	MODERATE	DOK7	101087477	transcript	XM_023253345.1	protein_coding	7	c.1105G>A	p.Ala369Thr
chrB1	206713448	C	A	PASS	missense_variant	MODERATE	ZFYVE28	101084445	transcript	XM_023253481.1	protein_coding	8	c.1435C>A	p.Pro479Thr
chrB1	206713448	C	A	PASS	missense_variant	MODERATE	ZFYVE28	101084445	transcript	XM_023253482.1	protein_coding	8	c.1420C>A	p.Pro474Thr
chrB1	206713448	C	A	PASS	missense_variant	MODERATE	ZFYVE28	101084445	transcript	XM_023253483.1	protein_coding	8	c.1435C>A	p.Pro479Thr
chrB1	206713448	C	A	PASS	missense_variant	MODERATE	ZFYVE28	101084445	transcript	XM_019829843.2	protein_coding	8	c.1225C>A	p.Pro409Thr
chrB1	206713448	C	A	PASS	missense_variant	MODERATE	ZFYVE28	101084445	transcript	XM_019829845.2	protein_coding	4	c.793C>A	p.Pro265Thr
chrB1	206713470	C	G	PASS	missense_variant	MODERATE	ZFYVE28	101084445	transcript	XM_023253481.1	protein_coding	8	c.1457C>G	p.Ala486Gly
chrB1	206713470	C	G	PASS	missense_variant	MODERATE	ZFYVE28	101084445	transcript	XM_023253482.1	protein_coding	8	c.1442C>G	p.Ala481Gly
chrB1	206713470	C	G	PASS	missense_variant	MODERATE	ZFYVE28	101084445	transcript	XM_023253483.1	protein_coding	8	c.1457C>G	p.Ala486Gly
chrB1	206713470	C	G	PASS	missense_variant	MODERATE	ZFYVE28	101084445	transcript	XM_019829843.2	protein_coding	8	c.1247C>G	p.Ala416Gly
chrB1	206713470	C	G	PASS	missense_variant	MODERATE	ZFYVE28	101084445	transcript	XM_019829845.2	protein_coding	4	c.815C>G	p.Ala272Gly
chrB2	4781895	G	GGGGGGT	PASS	disruptive_inframe_insertion	MODERATE	CARMIL1	101086228	transcript	XM_023253592.1	protein_coding	1	c.26_27insACCCCC	p.Pro9_Arg10insProPro
chrB2	4781895	G	GGGGGGT	PASS	disruptive_inframe_insertion	MODERATE	CARMIL1	101086228	transcript	XM_023253593.1	protein_coding	1	c.26_27insACCCCC	p.Pro9_Arg10insProPro
chrB2	4781895	G	GGGGGGT	PASS	disruptive_inframe_insertion	MODERATE	CARMIL1	101086228	transcript	XM_023253594.1	protein_coding	1	c.26_27insACCCCC	p.Pro9_Arg10insProPro
chrB2	4781895	G	GGGGGGT	PASS	disruptive_inframe_insertion	MODERATE	CARMIL1	101086228	transcript	XM_023253595.1	protein_coding	1	c.26_27insACCCCC	p.Pro9_Arg10insProPro
chrB2	4781895	G	GGGGGGT	PASS	disruptive_inframe_insertion	MODERATE	CARMIL1	101086228	transcript	XM_023253596.1	protein_coding	1	c.26_27insACCCCC	p.Pro9_Arg10insProPro
chrB2	4781895	G	GGGGGGT	PASS	disruptive_inframe_insertion	MODERATE	CARMIL1	101086228	transcript	XM_023253598.1	protein_coding	1	c.26_27insACCCCC	p.Pro9_Arg10insProPro
chrB2	4781895	G	GGGGGGT	PASS	disruptive_inframe_insertion	MODERATE	CARMIL1	101086228	transcript	XM_023253599.1	protein_coding	1	c.26_27insACCCCC	p.Pro9_Arg10insProPro
chrB2	4781895	G	GGGGGGT	PASS	disruptive_inframe_insertion	MODERATE	CARMIL1	101086228	transcript	XM_023253597.1	protein_coding	1	c.26_27insACCCCC	p.Pro9_Arg10insProPro
chrB2	4781895	G	GGGGGGT	PASS	disruptive_inframe_insertion	MODERATE	CARMIL1	101086228	transcript	XM_023253601.1	protein_coding	1	c.26_27insACCCCC	p.Pro9_Arg10insProPro
chrB2	4781895	G	GGGGGGT	PASS	disruptive_inframe_insertion	MODERATE	CARMIL1	101086228	transcript	XM_023253602.1	protein_coding	1	c.26_27insACCCCC	p.Pro9_Arg10insProPro
chrB2	4781895	G	GGGGGGT	PASS	disruptive_inframe_insertion	MODERATE	CARMIL1	101086228	transcript	XM_023253603.1	protein_coding	1	c.26_27insACCCCC	p.Pro9_Arg10insProPro
chrB2	4781895	G	GGGGGGT	PASS	disruptive_inframe_insertion	MODERATE	CARMIL1	101086228	transcript	XM_023253600.1	protein_coding	1	c.26_27insACCCCC	p.Pro9_Arg10insProPro
chrB2	32760399	G	T	PASS	missense_variant	MODERATE	VWA7	101090517	transcript	XM_011282308.3	protein_coding	3	c.262C>A	p.Leu88Ile
chrB2	32760399	G	T	PASS	missense_variant	MODERATE	VWA7	101090517	transcript	XM_003985940.5	protein_coding	3	c.262C>A	p.Leu88Ile
chrB2	32760399	G	T	PASS	missense_variant	MODERATE	VWA7	101090517	transcript	XM_006931571.4	protein_coding	3	c.262C>A	p.Leu88Ile
chrB2	32760399	G	T	PASS	missense_variant	MODERATE	VWA7	101090517	transcript	XM_023253755.1	protein_coding	3	c.262C>A	p.Leu88Ile
chrB2	42793388	G	T	PASS	missense_variant	MODERATE	USP49	101091870	transcript	XM_023253959.1	protein_coding	8	c.1924C>A	p.Gln642Lys
chrB2	42793388	G	T	PASS	missense_variant	MODERATE	USP49	101091870	transcript	XM_023253963.1	protein_coding	6	c.1924C>A	p.Gln642Lys
chrB2	42793388	G	T	PASS	missense_variant	MODERATE	USP49	101091870	transcript	XM_023253960.1	protein_coding	8	c.1924C>A	p.Gln642Lys
chrB2	42793388	G	T	PASS	missense_variant	MODERATE	USP49	101091870	transcript	XM_023253961.1	protein_coding	8	c.1924C>A	p.Gln642Lys
chrB2	42793388	G	T	PASS	missense_variant	MODERATE	USP49	101091870	transcript	XM_023253962.1	protein_coding	8	c.1924C>A	p.Gln642Lys
chrB2	43761405	A	C	PASS	missense_variant	MODERATE	RPL7L1	101082492	transcript	XM_003986146.5	protein_coding	3	c.188A>C	p.Gln63Pro
chrB2	43761405	A	C	PASS	missense_variant	MODERATE	RPL7L1	101082492	transcript	XM_019830598.2	protein_coding	3	c.188A>C	p.Gln63Pro
chrB2	43761405	A	C	PASS	missense_variant	MODERATE	RPL7L1	101082492	transcript	XM_006931718.4	protein_coding	3	c.185A>C	p.Gln62Pro
chrB2	59547761	C	CGTACA	PASS	frameshift_variant	HIGH	LOC111560474	111560474	transcript	XM_023254080.1	protein_coding	1	c.406_410dupTGTAC	p.Ser138fs
chrB2	78422500	G	A	PASS	missense_variant	MODERATE	MRAP2	101083426	transcript	XM_003986345.5	protein_coding	4	c.454G>A	p.Gly152Arg
chrB2	78422500	G	A	PASS	missense_variant	MODERATE	MRAP2	101083426	transcript	XM_019830919.1	protein_coding	2	c.196G>A	p.Gly66Arg
chrB2	78514852	G	A	PASS	missense_variant	MODERATE	CEP162	101087232	transcript	XM_011282478.2	protein_coding	9	c.796C>T	p.Pro266Ser
chrB2	78514852	G	A	PASS	missense_variant	MODERATE	CEP162	101087232	transcript	XM_019830923.1	protein_coding	4	c.259C>T	p.Pro87Ser
chrB2	78514852	G	A	PASS	missense_variant	MODERATE	CEP162	101087232	transcript	XM_019830920.1	protein_coding	9	c.796C>T	p.Pro266Ser
chrB2	78514852	G	A	PASS	missense_variant	MODERATE	CEP162	101087232	transcript	XM_019830922.1	protein_coding	9	c.796C>T	p.Pro266Ser
chrB2	79628226	C	A	PASS	stop_gained	HIGH	NT5E	101087744	transcript	XM_011282497.2	protein_coding	9	c.1719C>A	p.Tyr573*
chrB2	79628230	T	A	PASS	stop_lost	HIGH	NT5E	101087744	transcript	XM_011282497.2	protein_coding	9	c.1723T>A	p.Ter575Lysext*?
chrB2	83338222	G	C	PASS	missense_variant	MODERATE	CASP8AP2	101095416	transcript	XM_023254733.1	protein_coding	8	c.514G>C	p.Asp172His
chrB2	83367112	C	T	PASS	missense_variant	MODERATE	GJA10	101095659	transcript	XM_004001506.5	protein_coding	2	c.1279C>T	p.Arg427Cys
chrB2	83385464	G	A	PASS	missense_variant	MODERATE	BACH2	101098143	transcript	XM_019830959.2	protein_coding	6	c.2758C>T	p.Pro920Ser
chrB2	83385464	G	A	PASS	missense_variant	MODERATE	BACH2	101098143	transcript	XM_019830962.2	protein_coding	5	c.2326C>T	p.Pro776Ser
chrB2	83385464	G	A	PASS	missense_variant	MODERATE	BACH2	101098143	transcript	XM_011282461.3	protein_coding	7	c.2326C>T	p.Pro776Ser
chrB2	83385464	G	A	PASS	missense_variant	MODERATE	BACH2	101098143	transcript	XM_019830960.2	protein_coding	6	c.2347C>T	p.Pro783Ser
chrB2	93372340	G	T	PASS	stop_gained	HIGH	ASCC3	101086653	transcript	XM_019831018.2	protein_coding	33	c.5139C>A	p.Tyr1713*
chrB2	93372340	G	T	PASS	stop_gained	HIGH	ASCC3	101086653	transcript	XM_011282448.3	protein_coding	33	c.5139C>A	p.Tyr1713*
chrB2	93372340	G	T	PASS	stop_gained	HIGH	ASCC3	101086653	transcript	XM_019831019.2	protein_coding	33	c.5139C>A	p.Tyr1713*
chrB2	93372340	G	T	PASS	stop_gained	HIGH	ASCC3	101086653	transcript	XM_023254198.1	protein_coding	33	c.5139C>A	p.Tyr1713*
chrB2	93372341	TAAAAG	T	PASS	frameshift_variant	HIGH	ASCC3	101086653	transcript	XM_019831018.2	protein_coding	33	c.5133_5137delCTTTT	p.Asp1711fs
chrB2	93372341	TAAAAG	T	PASS	frameshift_variant	HIGH	ASCC3	101086653	transcript	XM_011282448.3	protein_coding	33	c.5133_5137delCTTTT	p.Asp1711fs
chrB2	93372341	TAAAAG	T	PASS	frameshift_variant	HIGH	ASCC3	101086653	transcript	XM_019831019.2	protein_coding	33	c.5133_5137delCTTTT	p.Asp1711fs
chrB2	93372341	TAAAAG	T	PASS	frameshift_variant	HIGH	ASCC3	101086653	transcript	XM_023254198.1	protein_coding	33	c.5133_5137delCTTTT	p.Asp1711fs
chrB2	93372348	C	T	PASS	missense_variant	MODERATE	ASCC3	101086653	transcript	XM_019831018.2	protein_coding	33	c.5131G>A	p.Asp1711Asn
chrB2	93372348	C	T	PASS	missense_variant	MODERATE	ASCC3	101086653	transcript	XM_011282448.3	protein_coding	33	c.5131G>A	p.Asp1711Asn
chrB2	93372348	C	T	PASS	missense_variant	MODERATE	ASCC3	101086653	transcript	XM_019831019.2	protein_coding	33	c.5131G>A	p.Asp1711Asn
chrB2	93372348	C	T	PASS	missense_variant	MODERATE	ASCC3	101086653	transcript	XM_023254198.1	protein_coding	33	c.5131G>A	p.Asp1711Asn
chrB2	97217660	T	G	PASS	missense_variant	MODERATE	HACE1	101095417	transcript	XM_023254199.1	protein_coding	12	c.1267A>C	p.Thr423Pro
chrB2	97217660	T	G	PASS	missense_variant	MODERATE	HACE1	101095417	transcript	XM_019831029.1	protein_coding	6	c.763A>C	p.Thr255Pro
chrB2	97217660	T	G	PASS	missense_variant	MODERATE	HACE1	101095417	transcript	XM_023254202.1	protein_coding	11	c.1135A>C	p.Thr379Pro
chrB2	97217660	T	G	PASS	missense_variant	MODERATE	HACE1	101095417	transcript	XM_023254200.1	protein_coding	12	c.1267A>C	p.Thr423Pro
chrB2	97217660	T	G	PASS	missense_variant	MODERATE	HACE1	101095417	transcript	XM_023254201.1	protein_coding	12	c.1267A>C	p.Thr423Pro
chrB2	101273199	G	A	PASS	missense_variant	MODERATE	CCDC162P	101100210	transcript	XM_023254735.1	protein_coding	19	c.2609G>A	p.Arg870Gln
chrB2	101354067	G	A	PASS	missense_variant	MODERATE	LOC111560600	111560600	transcript	XM_023254736.1	protein_coding	7	c.854G>A	p.Ser285Asn
chrB2	101454018	C	T	PASS	missense_variant	MODERATE	MICAL1	101100722	transcript	XM_023254231.1	protein_coding	3	c.410G>A	p.Arg137His
chrB2	101454018	C	T	PASS	missense_variant	MODERATE	MICAL1	101100722	transcript	XM_023254230.1	protein_coding	3	c.326G>A	p.Arg109His
chrB2	101454018	C	T	PASS	missense_variant	MODERATE	MICAL1	101100722	transcript	XM_023254233.1	protein_coding	3	c.326G>A	p.Arg109His
chrB2	101454018	C	T	PASS	missense_variant	MODERATE	MICAL1	101100722	transcript	XM_023254232.1	protein_coding	3	c.326G>A	p.Arg109His
chrB2	101454018	C	T	PASS	missense_variant	MODERATE	MICAL1	101100722	transcript	XM_003986443.3	protein_coding	2	c.326G>A	p.Arg109His
chrB2	125097345	A	T	PASS	missense_variant	MODERATE	AHI1	101081636	transcript	XM_019831276.2	protein_coding	3	c.98T>A	p.Leu33Gln
chrB2	125727741	GTGACCTATTT	G	PASS	frameshift_variant&splice_acceptor_variant&splice_region_variant&intron_variant	HIGH	MTFR2	101082156	transcript	XM_006932043.4	protein_coding	7	c.876-6_879delAAATAGGTCA	p.Ser293fs
chrB2	125727741	GTGACCTATTT	G	PASS	frameshift_variant&splice_acceptor_variant&splice_region_variant&intron_variant	HIGH	MTFR2	101082156	transcript	XM_019831284.1	protein_coding	7	c.876-6_879delAAATAGGTCA	p.Ser293fs
chrB2	125727741	GTGACCTATTT	G	PASS	frameshift_variant&splice_acceptor_variant&splice_region_variant&intron_variant	HIGH	MTFR2	101082156	transcript	XM_011282596.3	protein_coding	8	c.876-6_879delAAATAGGTCA	p.Ser293fs
chrB2	126548611	C	A	PASS	missense_variant	MODERATE	IFNGR1	101086811	transcript	XM_003986606.4	protein_coding	6	c.731G>T	p.Trp244Leu
chrB2	126548615	C	A	PASS	missense_variant	MODERATE	IFNGR1	101086811	transcript	XM_003986606.4	protein_coding	6	c.727G>T	p.Val243Phe
chrB2	126548617	G	A	PASS	missense_variant	MODERATE	IFNGR1	101086811	transcript	XM_003986606.4	protein_coding	6	c.725C>T	p.Ser242Phe
chrB2	126548620	T	A	PASS	missense_variant&splice_region_variant	MODERATE	IFNGR1	101086811	transcript	XM_003986606.4	protein_coding	6	c.722A>T	p.Asp241Val
chrB2	126548621	C	A	PASS	splice_acceptor_variant&intron_variant	HIGH	IFNGR1	101086811	transcript	XM_003986606.4	protein_coding	5	c.722-1G>T
chrB2	126548622	T	A	PASS	splice_acceptor_variant&intron_variant	HIGH	IFNGR1	101086811	transcript	XM_003986606.4	protein_coding	5	c.722-2A>T
chrB2	137785714	C	T	PASS	missense_variant	MODERATE	KATNA1	101099465	transcript	XM_003986638.5	protein_coding	4	c.488G>A	p.Gly163Glu
chrB2	137785714	C	T	PASS	missense_variant	MODERATE	KATNA1	101099465	transcript	XM_019831380.2	protein_coding	4	c.488G>A	p.Gly163Glu
chrB2	138781481	C	T	PASS	missense_variant	MODERATE	MTHFD1L	101082751	transcript	XM_023254505.1	protein_coding	1	c.62C>T	p.Pro21Leu
chrB2	138781481	C	T	PASS	missense_variant	MODERATE	MTHFD1L	101082751	transcript	XM_023254509.1	protein_coding	1	c.62C>T	p.Pro21Leu
chrB2	138781481	C	T	PASS	missense_variant	MODERATE	MTHFD1L	101082751	transcript	XM_023254507.1	protein_coding	1	c.62C>T	p.Pro21Leu
chrB2	138781481	C	T	PASS	missense_variant	MODERATE	MTHFD1L	101082751	transcript	XM_023254506.1	protein_coding	1	c.62C>T	p.Pro21Leu
chrB2	138796535	C	T	PASS	missense_variant	MODERATE	MTHFD1L	101082751	transcript	XM_023254505.1	protein_coding	7	c.740C>T	p.Thr247Ile
chrB2	138796535	C	T	PASS	missense_variant	MODERATE	MTHFD1L	101082751	transcript	XM_023254509.1	protein_coding	7	c.740C>T	p.Thr247Ile
[truncated: 1,619 more rows]

## Sheet: priv.hom.prot.chang.var. case 4
Table S4. 51 protein changing private variants in the sequenced domestic shorthair cat (case no. 4) with EDS. Private variants were obtained by filtering all variants that were present at least once in 54 control genomes. Variants are listed multiple times, if they have predicted effects on more than one transcript. Variants with a SnpEff predicted impact of "high" or "moderate" were considered p…
[truncated: 70 more rows]

[truncated: 1 more sheets: priv.het.prot.chang.var. case 4]
